# Supplementary material
Source: publisher site journal article supplement (https://www.dovepress.com/get_supplementary_file.php?f=496091.xlsx)
Supplement: Supplementary file 1 [file get_supplementary_file.php]

## Sheet: Abbreviations list
Abbreviations list
GWAS: genome-wide association studies
LDSC: linkage disequilibrium score regression
FDR: false discovery rate
AD: atopic dermatitis
RA: rheumatoid arthritis
IVs: instrumental variables
IVW: inverse variance weight
SCFAs: short-chain fatty acids
OPG: Osteoprotegerin
CXCL11: C-X-C motif chemokine 11
TRANCE: TNF-related activation cytokine
AXIN1: Axin-1
CCL25: C-C motif chemokine 25
TWEAK: Tumor necrosis factor (Ligand) superfamily member 12
TNFSF14: Tumor necrosis factor ligand superfamily member 14
STAMPB: STAM-binding protein
FGF-19: Fibroblast growth factor 19
IL-33: Interleukin-33
uPA: Urokinase-type plasminogen activator
ADA: Adenosine Deaminase
TGF-alpha: Transforming growth factor alpha
LAP TGF-beta-1: Latency-associated peptide transforming growth factor beta 1
Beta-NGF: Beta-nerve growth factor
TNFB: TNF-beta
TNF:Tumor necrosis factor
IFN-gamma: Interferon gamma
IL-1 alpha: Interleukin-1 alpha
CXCL10: C-X-C motif chemokine 10
MMP-1: Matrix metalloproteinase-1
IL-4: Interleukin-4
IL-5: Interleukin-5
IL-6: Interleukin-6
CD5: T-cell surface glycoprotein CD5
MMP-10: Matrix metalloproteinase-10
CXCL1: C-X-C motif chemokine 1
CSF-1: Macrophage colony-stimulating factor 1
IL-8: Interleukin-8
MIP-1 alpha: Macrophage inflammatory protein 1-alpha
IL-7: Interleukin-7
CCL4: C-C motif chemokine 4
MCP-1: Monocyte chemotactic protein 1
OSM: Oncostatin-M
HGF: Hepatocyte growth factor
IL-2RB: Interleukin-2 receptor subunit beta
LIF: Leukemia inhibitory factor
VEGF_A: Vascular endothelial growth factor A
NT-3: Neurotrophin-3
SCF: Stem cell factor
IL-10: Interleukin-10
CD40L receptor: CD40 ligand receptor
CST5: Cystatin D
IL-12B: Interleukin-12 subunit beta
IL-13: Interleukin-13
hGDNF: Glial cell line-derived neutrophic factor
LIF-R: Leukemia inhibitory factor receptor
CXCL5: C-X-C motif chemokine 5
FIt3L: Fms-related tyrosine kinase 3 ligand
ST1A1: Sulfotransferase 1A1
TRAIL: TNF-related apoptosis ligand
CCL11: Eotaxin-1
CCL23: C-C motif chemokine 23
IL-2: Interleukin-2
CX3CL1: Fractalkine
CCL20: C-C motif chemokine 20
MCP-2: Monocyte chemotactic protein 2
MCP-3: Monocyte chemotactic protein 3
CXCL6: C-X-C motif chemokine 6
EN-RAGE: Protein S100-A12
TNFRSF9: Tumor necrosis factor receptor superfamily member 9
CXCL9: C-X-C motif chemokine 9
IL10RB: Interleukin-10 receptor subunit beta
IL-24: Interleukin-24
IL-15RA: Interleukin-15 receptor subunit alpha
SLAMF1: Signaling lymphocytic activation molecule
IL-18R1: Interleukin-18 receptor 1
4EBP1: Eukaryotic translation initiation factor 4E-binding protein 1
IL10RA: Interleukin-10 receptor subunit alpha
IL-18: Interleukin-18
CASP-8: Caspase 8
IL-17A: Interleukin-17A
ARTN: Artemin
SIRT2: SIR2-like protein 2
IL-22RA1: Interleukin-22 receptor subunit alpha-1
FGF-5: Fibroblast growth factor 5
DNER: Delta and Notch-like epidermal growth factor related receptor
CD6: T-cell surface glycoprotein CD6 isoform
TSLP: Thymic stromal lymphopoietin
MCP-4: Monocyte chemotactic protein 4
CCL19: C-C motif chemokine 19
NRTN: Neurturin
CD244: Natural killer cell receptor 2B4
FGF-23: Fibroblast growth factor 23
CDCP1: CUB domain-containing protein 1
CCL28: C-C motif chemokine 28
FGF-21: Fibroblast growth factor 21
IL-20: Interleukin-20
PD-L1: Programmed cell death 1 ligand 1
IL-17C: Interleukin-17C
IL-20RA: Interleukin-20 receptor subunit alpha

## Sheet: Table S1
Table S1: Overview of the source of Inflammatory Skin Disease data.
GWAS ID	Trait	Consortium	Sample size	Case	Control	Population
/	Acne	FinnGen biobank	331060	2313	328747	European
/	Allergic contact dermatitis	FinnGen biobank	310755	3846	306909	European
/	Eczema	FinnGen biobank	309154	30359	278795	European
/	Psoriasis vulgaris	FinnGen biobank	335993	5018	330975	European
/	Seborrheic dermatitis	FinnGen biobank	369995	2949	367046	European
ieu-b-5116	Psoriatic arthritis	/	26351	5065	21286	European

## Sheet: Table S2
Table S2: heritability of gut microbiota,inflammatory cytokines and inflammatory dermatoses in Univariate LDSC
trait	mean_chisq	lambda_gc	intercept	intercept_se	ratio	ratio_se	h2_observed	h2_observed_se	h2_Z	h2_p
class Actinobacteria	1.01681	1.00351	0.982587	0.00923233	-1.0359	0.549221	0.105749	0.0490657	2.15525	0.031142
class Alphaproteobacteria	1.00628	0.999529	0.996451	0.00654131	-0.565452	1.04224	0.0514272	0.0522729	0.983822	0.325203
class Bacilli	1.00015	0.997872	0.992189	0.00650791	-51.4209	42.8438	0.0233514	0.0262438	0.889786	0.373581
class Bacteroidia	1.0097	1.01497	1.00215	0.00574894	0.221728	0.592807	0.0206865	0.0215571	0.959617	0.337248
class Betaproteobacteria	0.989647	0.989537	0.987307	0.00634235	1.22604	-0.612607	0.0069962	0.0271053	0.258112	0.79632
class Clostridia	0.999159	0.997124	0.989733	0.0068467	12.2145	-8.1451	0.026343	0.0260899	1.0097	0.312639
class Deltaproteobacteria	1.00812	1.0015	0.994826	0.00634127	-0.637176	0.780988	0.0444083	0.0285513	1.55539	0.119854
class Erysipelotrichia	1.00097	0.998564	0.999297	0.006323	-0.725255	6.52309	0.00471553	0.0240647	0.195953	0.844647
class Gammaproteobacteria	1.00928	1.00562	0.982934	0.00657943	-1.83825	0.708704	0.0843412	0.0294331	2.86552	0.00416319
class Methanobacteria	1.01004	1.00745	1.00708	0.00716635	0.705843	0.714131	0.0390357	0.131922	0.2959	0.767307
class Mollicutes	1.00374	1.01284	1.00027	0.00679042	0.0710095	1.81575	0.0154707	0.0401502	0.385322	0.699999
class Negativicutes	1.00136	0.999711	0.999618	0.00689007	-0.279865	5.05352	0.00504473	0.025291	0.199467	0.841897
class Verrucomicrobiae	1.0076	1.0016	0.990509	0.0064693	-1.24923	0.851485	0.0721056	0.0374979	1.92292	0.0544896
family Acidaminococcaceae	0.998068	1.00448	0.993602	0.00620654	3.31186	-3.21295	0.0179437	0.0339304	0.528838	0.596918
family Alcaligenaceae	0.990779	0.99145	0.987816	0.00617954	1.32128	-0.670155	0.00902899	0.0263452	0.342719	0.73181
family Bacteroidaceae	0.99913	1.00189	0.991868	0.00629935	9.35059	-7.24327	0.0203258	0.0253998	0.800235	0.423575
family Bifidobacteriaceae	1.01608	1.00368	0.982954	0.00982334	-1.06033	0.611039	0.111598	0.0578191	1.93012	0.0535922
family Christensenellaceae	1.01194	1.01046	0.996754	0.00662463	-0.271892	0.554941	0.0462832	0.0258224	1.79236	0.0730748
family Clostridiaceae1	1.01063	1.01031	0.986935	0.00668481	-1.22888	0.628744	0.0844021	0.0318101	2.65331	0.0079707
family Desulfovibrionaceae	1.00677	1.00235	0.994226	0.00628439	-0.853313	0.928709	0.0419863	0.0286983	1.46302	0.143461
family Enterobacteriaceae	1.00131	1.00676	0.991735	0.00635056	-6.327	4.86134	0.0356634	0.0319196	1.11729	0.263872
family Erysipelotrichaceae	1.00097	0.998564	0.999297	0.006323	-0.725255	6.52309	0.00471553	0.0240647	0.195953	0.844647
family FamilyXIII	1.00496	1.00109	1.00479	0.00726745	0.96425	1.46421	0.000587913	0.0292352	0.0201098	0.983956
family Lachnospiraceae	0.999238	0.998593	0.989215	0.00654786	14.1465	-8.58842	0.0279953	0.0231651	1.20851	0.22685
family Methanobacteriaceae	1.01003	1.00745	1.00709	0.00716588	0.706914	0.714398	0.0388747	0.131924	0.294675	0.768242
family Peptostreptococcaceae	1.0208	1.02145	0.991068	0.00622307	-0.42943	0.299184	0.0952362	0.0283963	3.35383	0.000797021
family Porphyromonadaceae	1.00838	0.996238	0.99078	0.00605742	-1.09972	0.722468	0.0501226	0.0251555	1.99251	0.0463153
family Prevotellaceae	1.00951	1.01796	1.0035	0.00586736	0.367943	0.616972	0.0203795	0.0310402	0.656553	0.511468
family Rhodospirillaceae	1.00584	1.00304	0.999213	0.00597557	-0.134884	1.0236	0.0388403	0.0538261	0.721588	0.470548
family Ruminococcaceae	0.998771	0.994153	0.991654	0.00662135	6.79355	-5.38957	0.0198881	0.02511	0.79204	0.428337
family Streptococcaceae	1.00631	1.00252	0.992319	0.00693675	-1.21663	1.09877	0.0427617	0.0296284	1.44327	0.148944
family Veillonellaceae	1.00363	1.00268	0.994949	0.00655126	-1.392	1.80557	0.0282422	0.0285355	0.989722	0.32231
family Verrucomicrobiaceae	1.00761	1.00168	0.990528	0.00646981	-1.24516	0.850466	0.0720683	0.0375044	1.9216	0.0546565
genus Clostridiuminnocuumgroup	1.00732	1.00696	1.0025	0.00678208	0.340851	0.926093	0.0577107	0.105524	0.546894	0.584451
genus Eubacteriumbrachygroup	1.00769	1.00754	1.00715	0.00787146	0.930067	1.02361	0.0065333	0.124541	0.052459	0.958163
genus Eubacteriumcoprostanoligenesgroup	1.00289	0.998699	0.996313	0.00614718	-1.27449	2.12498	0.0194803	0.0240654	0.809474	0.418243
genus Eubacteriumeligensgroup	0.999838	1.00596	0.991695	0.00679517	51.2262	-41.9115	0.028041	0.032361	0.866504	0.386214
genus Eubacteriumhalliigroup	0.995415	0.994932	0.988473	0.00596067	2.51401	-1.29999	0.0214541	0.0251966	0.85147	0.394508
genus Eubacteriumoxidoreducensgroup	0.99245	0.996561	0.989043	0.00661399	1.45126	-0.876019	0.0313881	0.0826425	0.379806	0.704089
genus Eubacteriumrectalegroup	0.991848	0.993749	0.990323	0.00644243	1.1871	-0.790328	0.0045023	0.0245269	0.183566	0.854354
genus Eubacteriumruminantiumgroup	1.01177	1.01247	0.998125	0.00689799	-0.159272	0.585934	0.0877143	0.0620736	1.41307	0.157635
genus Eubacteriumxylanophilumgroup	1.008	1.00578	0.993137	0.00652937	-0.857671	0.815986	0.0562819	0.0331509	1.69775	0.0895552
genus Ruminococcusgauvreauiigroup	1.01111	1.01347	1.0059	0.00646116	0.531083	0.581699	0.0195768	0.0339817	0.576098	0.564549
genus Actinomyces	0.996128	0.998857	0.993981	0.00698156	1.55436	-1.80287	0.0141537	0.0591296	0.239367	0.810821
genus Adlercreutzia	1.00513	1.00936	1.00256	0.00666837	0.498497	1.29968	0.0155036	0.0535107	0.289729	0.772024
genus Akkermansia	1.00772	1.00169	0.990366	0.00646601	-1.24831	0.83778	0.0732237	0.0374786	1.95375	0.0507313
genus Alistipes	0.996278	0.992027	0.995356	0.00650276	1.24788	-1.74734	0.00265684	0.0252545	0.105202	0.916215
genus Allisonella	1.01436	1.01839	1.01192	0.00841562	0.830276	0.586045	0.0349307	0.153106	0.228148	0.819531
genus Anaerofilum	1.00592	1.00815	1.00172	0.00628787	0.290485	1.06275	0.0385986	0.0922467	0.418428	0.675634
genus Anaerostipes	1.01353	1.01106	0.995368	0.0066042	-0.342253	0.487978	0.0550543	0.0294299	1.87069	0.061388
genus Anaerotruncus	0.992647	0.988162	0.982633	0.00644247	2.36189	-0.87618	0.0307395	0.0289413	1.06213	0.288175
genus Bacteroides	0.99913	1.00189	0.991868	0.00629935	9.35059	-7.24327	0.0203258	0.0253998	0.800235	0.423575
genus Barnesiella	1.00635	1.01216	0.992964	0.00627636	-1.10747	0.987903	0.0470589	0.0283099	1.66228	0.0964575
genus Bifidobacterium	1.01391	1.00153	0.983603	0.0098331	-1.1791	0.707101	0.10344	0.0576394	1.79461	0.0727164
genus Bilophila	0.997803	0.995206	0.990199	0.00683992	4.46081	-3.11305	0.0296871	0.0349069	0.850466	0.395066
genus Blautia	1.01235	1.01658	0.991484	0.00577128	-0.689277	0.467141	0.0583942	0.0232801	2.50834	0.0121301
genus Butyricicoccus	0.996841	0.99354	0.996193	0.00710309	1.20519	-2.24869	0.00193342	0.0274664	0.0703923	0.943881
genus Butyricimonas	1.00811	0.998749	1.00108	0.00668894	0.13321	0.824642	0.0325672	0.0413957	0.786731	0.43144
genus Catenibacterium	1.00958	1.01672	1.00916	0.00752327	0.955624	0.785167	0.00410126	0.152021	0.0269782	0.978477
genus ChristensenellaceaeR.7group	1.01196	1.0171	0.992177	0.00654895	-0.654144	0.547593	0.0617986	0.0269213	2.29552	0.0217031
genus Clostridiumsensustricto1	1.00978	1.01245	0.989255	0.00655751	-1.09853	0.670402	0.0737375	0.0315149	2.33976	0.019296
genus Collinsella	0.997768	0.995661	0.997332	0.00669513	1.19522	-2.99967	0.00151794	0.0316552	0.0479522	0.961754
genus Coprobacter	0.995405	0.992044	0.985803	0.00642055	3.08992	-1.39737	0.0697855	0.0644983	1.08198	0.279264
genus Coprococcus1	0.999543	0.996381	0.996108	0.00715811	8.51937	-15.6671	0.0104506	0.0310067	0.337044	0.736084
genus Coprococcus2	1.01131	1.00912	1.00067	0.00652833	0.0591253	0.576995	0.0469576	0.041504	1.1314	0.257887
genus Coprococcus3	1.00374	0.998136	0.999131	0.00669625	-0.232434	1.79095	0.0150029	0.0271298	0.553004	0.58026
genus Eggerthella	1.01593	1.02193	1.00323	0.00680508	0.202777	0.427211	0.12011	0.0925891	1.29723	0.194551
genus Eisenbergiella	1.00697	1.00559	1.00362	0.00647059	0.519578	0.92781	0.0298239	0.0824814	0.361584	0.717663
genus Enterorhabdus	1.00534	1.00392	0.999281	0.00617622	-0.134607	1.15698	0.0389214	0.057468	0.677271	0.498234
genus Erysipelatoclostridium	1.00648	1.00817	0.992096	0.00640822	-1.21893	0.988311	0.073652	0.0451716	1.63049	0.102997
genus ErysipelotrichaceaeUCG003	1.00574	1.00391	0.990055	0.00657245	-1.73128	1.14419	0.0532729	0.0307325	1.73344	0.0830178
genus Escherichia.Shigella	0.999434	0.997955	0.994721	0.00652349	9.3329	-11.5341	0.0197004	0.0370866	0.5312	0.59528
genus Faecalibacterium	0.998797	0.994961	0.990089	0.00597391	8.23567	-4.96398	0.0246648	0.0239348	1.0305	0.302774
genus FamilyXIIIAD3011group	1.00733	1.00073	0.997815	0.00635634	-0.29826	0.86769	0.0341371	0.0324654	1.05149	0.293032
genus Flavonifractor	1.00754	1.00579	0.990946	0.00642136	-1.20101	0.851753	0.0769303	0.0427109	1.80119	0.0716736
genus Fusicatenibacter	1.00267	1.00434	1.00155	0.0069494	0.580985	2.60189	0.00321981	0.026079	0.123464	0.90174
genus Haemophilus	0.994112	0.993951	0.993475	0.00607485	1.10827	-1.03178	0.00348452	0.0493398	0.0706228	0.943698
genus Holdemania	0.995962	0.999863	0.991221	0.00697803	2.17406	-1.72806	0.0258111	0.049047	0.526253	0.598712
genus Intestinibacter	1.01407	1.01743	1.00061	0.00677991	0.0434261	0.481972	0.0538995	0.0374518	1.43917	0.150103
genus Lachnoclostridium	1.0071	1.00455	0.986992	0.00629425	-1.83317	0.886999	0.057507	0.0273933	2.0993	0.0357901
genus Lachnospira	1.00128	0.999981	1.0011	0.00608277	0.852978	4.73575	0.000636664	0.0260474	0.0244425	0.9805
genus LachnospiraceaeFCS020group	1.00737	1.00509	0.982204	0.00727598	-2.41394	0.986961	0.091708	0.0361337	2.53802	0.0111483
genus LachnospiraceaeNC2004group	1.00154	0.996159	0.994115	0.00703544	-3.8289	4.57702	0.058385	0.0740127	0.788851	0.430199
genus LachnospiraceaeUCG004	1.00442	0.998907	0.987665	0.00583494	-2.78962	1.31959	0.0588851	0.0315251	1.86788	0.0617791
genus LachnospiraceaeUCG010	1.00694	1.00799	0.999995	0.00616614	-0.000666712	0.88819	0.0267888	0.0330837	0.809729	0.418096
genus Marvinbryantia	1.00009	1.00333	0.999618	0.00628569	-4.14927	68.2453	0.00196503	0.036152	0.0543546	0.956653
genus Methanobrevibacter	1.01359	1.01361	1.00659	0.00707964	0.484774	0.521044	0.0952761	0.133211	0.715227	0.474469
genus Olsenella	1.00359	1.00466	1.00342	0.00726461	0.953565	2.02481	0.00290929	0.122695	0.0237115	0.981083
genus Oscillospira	1.01645	1.01662	1.00977	0.00719202	0.594248	0.437317	0.0330564	0.046625	0.708984	0.478334
genus Parabacteroides	1.00395	1.00479	0.995047	0.00596331	-1.25241	1.50798	0.0262364	0.0261685	1.0026	0.316056
genus Parasutterella	1.00048	1.00175	0.998093	0.00681143	-3.97185	14.1876	0.0104827	0.0431028	0.243201	0.807849
genus Peptococcus	1.00611	1.01333	1.00486	0.00676468	0.796445	1.10792	0.0103858	0.0809495	0.128299	0.897912
genus Prevotella7	1.00888	1.0132	1.00596	0.00704294	0.671256	0.793515	0.0422479	0.132834	0.318049	0.750447
genus RikenellaceaeRC9gutgroup	1.00946	1.01256	1.00116	0.00642135	0.12272	0.678965	0.118106	0.126109	0.936537	0.348997
genus Romboutsia	1.00477	0.992839	0.998082	0.00649906	-0.402059	1.36207	0.0240384	0.0301495	0.79731	0.425271
genus Roseburia	1.00949	1.00801	1.00015	0.00618272	0.0161835	0.651449	0.0272942	0.0256088	1.06581	0.28651
genus Ruminiclostridium9	1.01736	1.01428	0.983205	0.00622261	-0.967589	0.3585	0.103561	0.0282615	3.6644	0.000247916
genus RuminococcaceaeNK4A214group	1.01716	1.01633	1.01124	0.00715264	0.655451	0.416942	0.0194955	0.0302714	0.644024	0.51956
genus RuminococcaceaeUCG002	1.01283	1.01244	1.00576	0.00668315	0.44905	0.520818	0.0213662	0.0291144	0.733871	0.463027
genus RuminococcaceaeUCG003	1.0025	1.00645	0.995881	0.00564134	-1.64842	2.25781	0.0234234	0.0269606	0.868802	0.384955
genus RuminococcaceaeUCG004	1.00343	1.01123	0.99805	0.00563937	-0.567781	1.64202	0.028581	0.0416113	0.686858	0.492172
genus RuminococcaceaeUCG005	1.00999	1.00422	0.996087	0.00677563	-0.391868	0.678474	0.0434197	0.0273998	1.58467	0.113041
genus RuminococcaceaeUCG010	1.00488	1.00649	0.998453	0.00682872	-0.317177	1.39994	0.0252325	0.0339577	0.743056	0.457448
genus RuminococcaceaeUCG011	1.00751	1.0017	1.00709	0.00757294	0.942972	1.00778	0.00355464	0.142889	0.024877	0.980153
genus RuminococcaceaeUCG014	1.00016	1.0034	0.992232	0.00636669	-48.7833	39.9808	0.0277336	0.0334925	0.828055	0.40764
genus Ruminococcus2	1.0048	1.00621	0.99243	0.00608174	-1.57691	1.26695	0.0407298	0.0267826	1.52076	0.128321
genus Sellimonas	1.02084	1.02055	1.00658	0.00783194	0.315536	0.375748	0.210631	0.158755	1.32677	0.184586
genus Slackia	1.00733	1.01333	0.992163	0.00711258	-1.06925	0.970476	0.121686	0.0809757	1.50274	0.132906
genus Streptococcus	1.00548	1.0069	0.997631	0.00683693	-0.43202	1.24705	0.0243899	0.0290598	0.839298	0.401302
genus Subdoligranulum	1.00552	1.00947	0.998351	0.00632452	-0.298863	1.14645	0.0208029	0.0235472	0.883453	0.376992
genus Sutterella	1.00005	0.992784	0.990862	0.007047	-203.058	156.598	0.0350442	0.0413648	0.847198	0.396885
genus Terrisporobacter	1.0058	1.0038	0.994847	0.00700158	-0.888723	1.20748	0.08239	0.0683905	1.2047	0.22832
genus Turicibacter	1.00626	1.0127	1.00128	0.00664497	0.204454	1.0616	0.0277775	0.0500942	0.554504	0.579234
genus Veillonella	1.00703	1.00619	1.00624	0.00706515	0.887415	1.00541	0.0045344	0.0454724	0.0997175	0.920569
order Bacteroidales	1.0097	1.01497	1.00216	0.00574933	0.222215	0.592769	0.020676	0.0215574	0.959114	0.337501
order Bifidobacteriales	1.01608	1.00368	0.982954	0.00982334	-1.06033	0.611039	0.111598	0.0578191	1.93012	0.0535922
order Burkholderiales	0.989618	0.989247	0.987877	0.00630065	1.16767	-0.606893	0.00522237	0.0268618	0.194416	0.84585
order Clostridiales	0.999251	0.997779	0.989522	0.00687247	13.9931	-9.17781	0.0271883	0.0261709	1.03887	0.298863
order Desulfovibrionales	1.00718	1.00276	0.99418	0.00626105	-0.810416	0.871793	0.0435233	0.0285811	1.5228	0.12781
order Enterobacteriales	1.00131	1.00676	0.991735	0.00635056	-6.327	4.86134	0.0356634	0.0319196	1.11729	0.263872
order Erysipelotrichales	1.00097	0.998564	0.999297	0.006323	-0.725255	6.52309	0.00471553	0.0240647	0.195953	0.844647
order Lactobacillales	0.999225	0.996877	0.9899	0.00656298	13.0396	-8.47311	0.0274835	0.0273959	1.0032	0.315766
order Methanobacteriales	1.01004	1.00745	1.00708	0.00716635	0.705843	0.714131	0.0390357	0.131922	0.2959	0.767307
order MollicutesRF9	1.00579	1.00984	1.0038	0.0065631	0.656492	1.13377	0.00991046	0.0452159	0.219181	0.826509
order Rhodospirillales	1.0057	0.999851	0.999807	0.00587909	-0.0338807	1.03083	0.0343025	0.0527057	0.650831	0.515155
order Selenomonadales	1.00136	0.999711	0.999618	0.00689007	-0.279865	5.05352	0.00504473	0.025291	0.199467	0.841897
order Verrucomicrobiales	1.0076	1.0016	0.990509	0.0064693	-1.24923	0.851485	0.0721056	0.0374979	1.92292	0.0544896
phylum Actinobacteria	1.00123	0.997256	0.984277	0.00840829	-12.7638	6.82583	0.0481323	0.040104	1.20019	0.230067
phylum Bacteroidetes	1.00983	1.01591	1.00254	0.00571314	0.257982	0.58121	0.0200207	0.0213791	0.936464	0.349034
phylum Cyanobacteria	0.995867	0.992942	0.994796	0.00687191	1.25914	-1.6626	0.00742875	0.0653433	0.113688	0.909485
phylum Euryarchaeota	1.00954	1.01141	1.00271	0.00676383	0.28423	0.708945	0.0874199	0.120566	0.725079	0.468404
phylum Firmicutes	0.997772	0.995372	0.995068	0.00700986	2.2133	-3.1457	0.007562	0.0265593	0.284722	0.775857
phylum Proteobacteria	0.997329	0.995906	0.983144	0.00607613	6.31185	-2.27521	0.0398298	0.0241449	1.64962	0.0990215
phylum Tenericutes	1.00374	1.01284	1.00027	0.00679042	0.0710095	1.81575	0.0154707	0.0401502	0.385322	0.699999
phylum Verrucomicrobia	1.00366	0.996237	0.987582	0.00613846	-3.39668	1.67902	0.0649881	0.0335424	1.93749	0.0526853
Acne	1.06035	1.06367	1.02003	0.00661985	0.331868	0.109698	0.0059763	0.00141878	4.21227	2.53e-05
Allergic_conttact	1.0381	1.0309	1.01386	0.00658717	0.363773	0.172903	0.00404565	0.00159104	2.54277	0.0109978
Eczema	1.20186	1.16527	1.06292	0.00991586	0.311721	0.0491218	0.0226241	0.00258751	8.7436	2.26e-18
Psoriasis_vulgaris	1.13981	1.11643	1.06324	0.00876115	0.452353	0.0626647	0.0121289	0.00178495	6.7951	1.08e-11
Psoriatic_arthritis	1.19338	1.16108	1.17159	0.00866913	0.887322	0.04483	0.0283552	0.02942	0.963807	0.335143
Seborrheic_dermatitis	1.05087	1.04982	1.01555	0.00708581	0.30575	0.139285	0.00487792	0.00138511	3.52167	0.000428834
Eukaryotic translation initiation factor 4E-binding protein 1 levels	1.00717	1.00091	0.987022	0.00568549	-1.81062	0.793194	0.0711333	0.0291811	2.43765	0.0147829
Adenosine Deaminase levels	1.00542	1.00091	1.00421	0.00719417	0.777167	1.32827	0.00443021	0.0297328	0.149	0.881553
Artemin levels	0.998208	1.00045	0.995531	0.00582592	2.49416	-3.25117	0.0117591	0.0317225	0.370686	0.710871
Axin-1 levels	1.01439	1.01458	1.0015	0.00653739	0.104082	0.454266	0.0566177	0.037936	1.49245	0.135581
beta-nerve growth factor levels	1.01556	1.01214	0.993486	0.0062847	-0.418498	0.403792	0.0773618	0.0309992	2.49561	0.0125741
Caspase 8 levels	0.997227	0.990649	0.986558	0.00600623	4.84685	-2.16563	0.0377294	0.0273898	1.3775	0.168357
Eotaxin levels	1.02726	1.01807	0.988952	0.00617263	-0.40522	0.226397	0.136149	0.0342951	3.96992	7.19e-05
C-C motif chemokine 19 levels	1.03744	1.02903	0.99568	0.00643707	-0.115393	0.171944	0.148992	0.0352101	4.23152	2.32e-05
C-C motif chemokine 20 levels	1.02763	1.02903	0.998633	0.00664603	-0.0494678	0.240568	0.101523	0.0313437	3.23902	0.0011994
C-C motif chemokine 23 levels	1.01173	1.0095	1.00351	0.007362	0.299512	0.627775	0.0288258	0.0311327	0.9259	0.354498
C-C motif chemokine 25 levels	1.03121	1.02857	1.0012	0.0118477	0.0383134	0.37965	0.104435	0.0434928	2.40121	0.0163411
C-C motif chemokine 28 levels	1.04275	1.03895	1.00881	0.00657922	0.205971	0.153884	0.119478	0.0320547	3.72731	0.000193533
C-C motif chemokine 4 levels	1.02752	1.01033	0.991597	0.00935174	-0.305375	0.339838	0.126197	0.081695	1.54473	0.122411
Natural killer cell receptor 2B4 levels	1.03057	1.02185	0.9987	0.00655286	-0.0425458	0.214385	0.111436	0.0357337	3.11853	0.00181758
CD40L receptor levels	1.0106	1.00934	0.999164	0.00691974	-0.0788217	0.65257	0.0402741	0.0297484	1.35382	0.175793
T-cell surface glycoprotein CD5 levels	1.04609	1.03287	1.008	0.00704017	0.173509	0.152759	0.136786	0.0383516	3.56663	0.000361599
T-cell surface glycoprotein CD6 isoform levels	1.04063	1.03287	1.0144	0.00806198	0.354402	0.198431	0.0938429	0.0348503	2.69274	0.00708674
CUB domain-containing protein 1 levels	1.03833	1.02903	1.00519	0.00674447	0.135328	0.175971	0.115827	0.0356698	3.2472	0.00116547
Macrophage colony-stimulating factor 1 levels	1.01514	1.0116	0.992432	0.00603748	-0.499912	0.3988	0.080291	0.0335427	2.39369	0.0166798
Cystatin D levels	1.03846	1.03575	0.999552	0.00612725	-0.0116419	0.159306	0.140744	0.0437228	3.219	0.00128638
Fractalkine levels	1.0299	1.02035	1.01036	0.00758209	0.346314	0.25354	0.0698364	0.0313125	2.23031	0.025727
C-X-C motif chemokine 1 levels	1.00385	1.00215	1.00092	0.00561429	0.239049	1.45799	0.0105166	0.0284133	0.370128	0.711287
C-X-C motif chemokine 10 levels	1.02204	1.01292	0.987878	0.00704701	-0.550014	0.319755	0.119921	0.0440959	2.71955	0.00653707
C-X-C motif chemokine 11 levels	1.02718	1.01987	0.995191	0.005927	-0.176905	0.218052	0.114323	0.0384841	2.97066	0.00297164
C-X-C motif chemokine 5 levels	1.02195	1.02015	1.0034	0.0060411	0.154738	0.275162	0.0670625	0.034105	1.96635	0.0492581
C-X-C motif chemokine 6 levels	1.02043	1.01739	0.994559	0.00593998	-0.266372	0.29079	0.0929553	0.0287761	3.2303	0.00123662
C-X-C motif chemokine 9 levels	1.03459	1.02064	0.998597	0.00706005	-0.0405614	0.204086	0.127283	0.0408693	3.1144	0.00184318
Delta and Notch-like epidermal growth factor-related receptor levels	1.02679	1.02639	1.00212	0.00741558	0.0791081	0.276757	0.0882852	0.0277384	3.18278	0.0014587
Protein S100-A12 levels	0.9995	1.00215	0.983171	0.00578341	33.6369	-11.5597	0.0577407	0.0269957	2.13888	0.032445
Fibroblast growth factor 19 levels	1.01578	1.01262	0.98229	0.00643797	-1.12252	0.408069	0.118187	0.0346707	3.40885	0.000652381
Fibroblast growth factor 21 levels	1.02153	1.01139	0.990339	0.00595936	-0.448775	0.276824	0.110438	0.035639	3.09881	0.001943
Fibroblast growth factor 23 levels	1.01256	1.00482	0.984991	0.00623034	-1.19518	0.496141	0.0982878	0.0294446	3.33805	0.000843672
Fibroblast growth factor 5 levels	1.02073	1.01722	1.00951	0.00644499	0.458535	0.310913	0.0479131	0.0369379	1.29712	0.194589
Fms-related tyrosine kinase 3 ligand levels	1.05429	1.04271	1.00027	0.00732488	0.00490748	0.13491	0.192695	0.0378255	5.0943	3.5e-07
Glial cell line-derived neurotrophic factor levels	1.024	1.02185	0.997968	0.00736362	-0.0846762	0.306866	0.0907139	0.037066	2.44736	0.0143906
Hepatocyte growth factor levels	1.01964	1.0195	1.0023	0.00639226	0.116964	0.325549	0.0601869	0.033836	1.77878	0.0752758
Interferon gamma levels	1.00321	1.00034	0.997891	0.00625449	-0.656198	1.94626	0.0233128	0.0371142	0.628135	0.529915
Interleukin-10 levels	1.015	1.00977	0.994752	0.00631392	-0.349871	0.420897	0.071073	0.0319815	2.22231	0.0262621
Interleukin-10 receptor subunit alpha levels	1.01682	1.01913	0.991191	0.00681295	-0.523607	0.404947	0.110073	0.0474474	2.3199	0.020346
Interleukin-10 receptor subunit beta levels	1.02428	1.02248	0.997296	0.00694609	-0.111364	0.28608	0.0948345	0.0317731	2.98474	0.00283816
Interleukin-12 subunit beta levels	1.02726	1.00934	0.998127	0.00812561	-0.0687054	0.298066	0.10132	0.0430698	2.35245	0.01865
Interleukin-15 receptor subunit alpha levels	1.01825	1.01446	1.00983	0.00737841	0.538591	0.404402	0.0366652	0.0352656	1.03969	0.298486
Interleukin-17A levels	1.02451	1.01895	0.996541	0.00661996	-0.141101	0.270076	0.12297	0.0413041	2.9772	0.00290898
Interleukin-17C levels	1.0258	1.01925	1.00108	0.00610034	0.0420345	0.236476	0.108385	0.0383064	2.82941	0.0046634
Interleukin-18 levels	1.01751	1.01562	0.997568	0.00646374	-0.138884	0.36909	0.0710572	0.0392597	1.80993	0.0703074
interleukin-18 receptor 1 levels	1.01742	1.00465	1.00537	0.00645928	0.308036	0.370836	0.0419834	0.0378065	1.11048	0.266792
Interleukin-1-alpha levels	1.00374	1.00215	0.994806	0.00567876	-1.38704	1.5166	0.0393411	0.0363338	1.08277	0.278911
Interleukin-2 levels	1.01171	1.01373	0.99484	0.00556083	-0.440702	0.474973	0.0730699	0.0352143	2.07501	0.0379859
Interleukin-20 levels	1.01442	1.01895	1.00016	0.00550716	0.0112095	0.381874	0.0617997	0.0348553	1.77304	0.0762229
Interleukin-22 receptor subunit alpha-1 levels	0.996259	0.992262	0.984531	0.00617792	4.13456	-1.6512	0.0514539	0.0392047	1.31244	0.189371
Interleukin-24 levels	1.00023	0.996187	0.998361	0.00580028	-7.04136	24.9249	0.00824286	0.0384243	0.214522	0.83014
Interleukin-2 receptor subunit beta levels	0.999945	0.998768	0.986887	0.00656774	238.338	-119.377	0.0572962	0.0397549	1.44124	0.149518
Interleukin-4 levels	1.01124	1.01139	0.995765	0.00630314	-0.376915	0.561003	0.0661899	0.0401432	1.64885	0.0991789
Interleukin-6 levels	1.00211	1.00344	0.994004	0.00564574	-2.84363	2.67746	0.0285418	0.0322221	0.885782	0.375735
Interleukin-7 levels	1.00877	1.00795	0.987596	0.00605229	-1.41434	0.69012	0.0752431	0.0283218	2.65672	0.00789044
Interleukin-8 levels	1.00885	0.99454	1.00135	0.00579973	0.152987	0.655615	0.0266173	0.0303359	0.877418	0.380259
Latency-associated peptide transforming growth factor beta 1 levels	1.01841	1.01458	1.00601	0.00657374	0.326401	0.357159	0.0434404	0.0296356	1.46582	0.142698
Leukemia inhibitory factor levels	1.00543	1.00556	0.99948	0.00616321	-0.0957809	1.13519	0.025414	0.0383329	0.662983	0.507342
Leukemia inhibitory factor receptor levels	1.0188	1.01458	1.00424	0.00609422	0.225604	0.324153	0.0639807	0.0376405	1.69978	0.0891717
Monocyte chemoattractant protein-1 levels	1.01596	1.00552	0.994076	0.00661257	-0.371129	0.414293	0.0772015	0.0456158	1.69243	0.0905644
Monocyte chemoattractant protein 2 levels	1.01382	1.01115	0.997451	0.00822428	-0.184379	0.594942	0.057912	0.0312074	1.85571	0.0634946
Monocyte chemoattractant protein-3 levels	1.02332	1.02768	0.99958	0.00655429	-0.0180252	0.281084	0.104219	0.0427847	2.43588	0.0148555
Monocyte chemoattractant protein-4 levels	1.03449	1.02264	0.989912	0.00690391	-0.292488	0.200165	0.160231	0.0348471	4.59813	4.26e-06
Macrophage inflammatory protein 1a levels	1.01542	1.01641	0.993439	0.00749478	-0.425587	0.486124	0.0775594	0.0297399	2.60793	0.00910921
Matrix metalloproteinase-1 levels	1.02697	1.01842	1.00913	0.00783274	0.338601	0.290389	0.065007	0.0317255	2.04904	0.0404578
Matrix metalloproteinase-10 levels	1.01211	1.00538	0.999474	0.00693504	-0.0434054	0.572698	0.0449946	0.0403616	1.11479	0.264941
Neurturin levels	1.01136	1.01214	1.00653	0.00589191	0.574816	0.518662	0.0204767	0.0381309	0.537011	0.59126
Neurotrophin-3 levels	1.00866	1.01121	0.988579	0.00673702	-1.31933	0.778215	0.0710181	0.0301051	2.35901	0.0183238
Osteoprotegerin levels	1.04389	1.03025	1.01213	0.00641851	0.276407	0.146238	0.109108	0.0383742	2.84325	0.00446558
Oncostatin-M levels	1.00996	1.00189	0.985159	0.00615836	-1.49053	0.61852	0.0877269	0.0331536	2.64608	0.0081431
Programmed cell death 1 ligand 1 levels	1.01553	1.01547	0.995149	0.00654473	-0.312335	0.421384	0.0725278	0.0308056	2.35437	0.018554
Stem cell factor levels	1.04577	1.02968	0.993137	0.0071216	-0.149953	0.155605	0.18308	0.0427254	4.28504	1.83e-05
SIR2-like protein 2 levels	0.998717	0.996977	0.989907	0.00638732	7.86365	-4.97669	0.0311741	0.0302606	1.03019	0.302922
Signaling lymphocytic activation molecule levels	1.04386	1.03575	1.00197	0.00711318	0.0449662	0.162171	0.148142	0.0339061	4.36918	1.25e-05
Sulfotransferase 1A1 levels	1.00975	1.01722	1.00393	0.00673893	0.403328	0.691429	0.0253748	0.0394609	0.643037	0.5202
STAM binding protein levels	1.0005	1.00525	0.992302	0.00609831	-15.308	12.1276	0.028994	0.029102	0.996287	0.319111
Transforming growth factor-alpha levels	1.00964	1.00309	0.980143	0.0064679	-2.05919	0.67072	0.104199	0.0338363	3.0795	0.0020735
Tumor necrosis factor levels	1.01663	1.00723	1.01473	0.00623497	0.885386	0.374863	0.00751282	0.0399218	0.188188	0.850729
TNF-beta levels	1.0171	1.00588	1.01157	0.00719602	0.676796	0.420886	0.0238858	0.0527573	0.452749	0.65073
Tumor necrosis factor receptor superfamily member 9 levels	1.04024	1.04029	1.00629	0.0059252	0.156327	0.147231	0.149924	0.0416981	3.59546	0.000323819
Tumor necrosis factor ligand superfamily member 14 levels	1.02303	1.02084	1.0066	0.00846056	0.286669	0.367305	0.0718369	0.0481595	1.49165	0.135792
TNF-related apoptosis-inducing ligand levels	1.03176	1.02988	0.98902	0.00691212	-0.345742	0.217652	0.149237	0.0360883	4.13532	3.54e-05
TNF-related activation-induced cytokine levels	1.04457	1.03525	1.00193	0.00690465	0.0432447	0.154904	0.14968	0.0366356	4.08563	4.4e-05
Thymic stromal lymphopoietin levels	1.01921	1.02185	0.998915	0.0055572	-0.05646	0.289312	0.0877045	0.038473	2.27964	0.0226293
Tumor necrosis factor ligand superfamily member 12 levels	1.02656	1.01842	1.00036	0.0065986	0.0136358	0.248484	0.0915061	0.0313072	2.92284	0.00346853
Urokinase-type plasminogen activator levels	1.0312	1.01764	0.992305	0.00786193	-0.24664	0.251981	0.135162	0.0438224	3.08431	0.00204028
Vascular endothelial growth factor A levels	1.01123	1.00871	1.00261	0.00901198	0.232394	0.80222	0.0302824	0.0366682	0.825849	0.40889

## Sheet: Table S3
Table S3: Genetic correlation between gut microbiota/inflammatory cytokines and inflammatory dermatoses
trait1	trait2	rg	rg_se	pval	adjustP
class Actinobacteria	Acne	0.125747	0.216079	0.560602	1
class Alphaproteobacteria	Acne	-0.166796	0.312523	0.593544	1
class Bacilli	Acne	-0.00162625	0.353028	0.996324	0.996324
class Bacteroidia	Acne	-0.101603	0.398495	0.798749	1
class Betaproteobacteria	Acne	0.315765	0.684276	0.64447	0.977567
class Clostridia	Acne	0.307965	0.362978	0.396192	1
class Deltaproteobacteria	Acne	0.231896	0.33766	0.492225	1
class Erysipelotrichia	Acne	0.611279	0.778766	0.432493	1
class Gammaproteobacteria	Acne	-0.0443455	0.206373	0.82986	1
class Methanobacteria	Acne	0.336084	0.660237	0.610728	1
class Mollicutes	Acne	-0.326305	0.571763	0.568203	1
class Negativicutes	Acne	0.532777	0.748207	0.47642	1
class Verrucomicrobiae	Acne	0.33315	0.296871	0.261774	1
family Acidaminococcaceae	Acne	0.928471	0.569748	0.103183	1
family Alcaligenaceae	Acne	0.406434	0.601029	0.498894	1
family Bacteroidaceae	Acne	-0.0184075	0.400517	0.963343	1
family Bifidobacteriaceae	Acne	0.138238	0.213741	0.517792	1
family Christensenellaceae	Acne	-0.173346	0.265983	0.514584	1
family Clostridiaceae1	Acne	0.166008	0.209708	0.428585	1
family Desulfovibrionaceae	Acne	0.206962	0.346606	0.550434	1
family Enterobacteriaceae	Acne	-0.39813	0.37102	0.28324	1
family Erysipelotrichaceae	Acne	0.611279	0.778766	0.432493	1
family FamilyXIII	Acne	1.60968	2.63393	0.541114	1
family Lachnospiraceae	Acne	0.168617	0.334526	0.614228	0.964195
family Methanobacteriaceae	Acne	0.336559	0.66163	0.610975	0.981924
family Peptostreptococcaceae	Acne	0.302824	0.196595	0.123476	1
family Porphyromonadaceae	Acne	-0.100249	0.222362	0.652108	0.978162
family Prevotellaceae	Acne	-0.553893	0.474183	0.242766	1
family Rhodospirillaceae	Acne	-0.099027	0.408984	0.80868	1
family Ruminococcaceae	Acne	0.473351	0.405773	0.243395	1
family Streptococcaceae	Acne	0.05703	0.29317	0.845762	1
family Veillonellaceae	Acne	-0.15849	0.312299	0.611809	0.971696
family Verrucomicrobiaceae	Acne	0.332657	0.296911	0.262547	1
genus Clostridiuminnocuumgroup	Acne	-0.0750772	0.487308	0.877558	1
genus Eubacteriumbrachygroup	Acne	0.349792	1.62994	0.830076	1
genus Eubacteriumcoprostanoligenesgroup	Acne	-0.0325787	0.370594	0.929949	1
genus Eubacteriumeligensgroup	Acne	0.667449	0.383792	0.0820189	1
genus Eubacteriumhalliigroup	Acne	-0.219082	0.388611	0.57292	1
genus Eubacteriumoxidoreducensgroup	Acne	-0.265583	0.630837	0.673755	0.978031
genus Eubacteriumrectalegroup	Acne	-0.22446	0.796212	0.778012	1
genus Eubacteriumruminantiumgroup	Acne	-0.0983665	0.335404	0.76931	1
genus Eubacteriumxylanophilumgroup	Acne	0.144768	0.26202	0.580599	0.992164
genus Ruminococcusgauvreauiigroup	Acne	0.674607	0.50802	0.184206	1
genus Actinomyces	Acne	0.30913	0.696563	0.657192	0.964358
genus Adlercreutzia	Acne	0.00425434	0.728384	0.99534	1
genus Akkermansia	Acne	0.328527	0.294929	0.265314	1
genus Alistipes	Acne	0.07959	0.989742	0.935907	1
genus Allisonella	Acne	0.749414	0.763082	0.326057	1
genus Anaerofilum	Acne	-0.446821	0.546428	0.413521	1
genus Anaerostipes	Acne	0.102121	0.259012	0.693381	0.975067
genus Anaerotruncus	Acne	0.473103	0.356239	0.184161	1
genus Bacteroides	Acne	-0.0184075	0.400517	0.963343	1
genus Barnesiella	Acne	0.319113	0.323893	0.324505	1
genus Bifidobacterium	Acne	0.184751	0.221111	0.403404	1
genus Bilophila	Acne	0.469476	0.425076	0.269397	1
genus Blautia	Acne	-0.0565693	0.227701	0.803796	1
genus Butyricicoccus	Acne	0.410522	1.06228	0.699161	0.97306
genus Butyricimonas	Acne	-0.363768	0.382865	0.342051	1
genus Catenibacterium	Acne	2.30175	2.18052	0.291153	1
genus ChristensenellaceaeR.7group	Acne	-0.079089	0.234213	0.735605	0.993067
genus Clostridiumsensustricto1	Acne	0.245343	0.22311	0.271484	1
genus Collinsella	Acne	0.0933918	1.43122	0.947972	1
genus Coprobacter	Acne	0.365881	0.362138	0.312334	1
genus Coprococcus1	Acne	0.57453	0.623821	0.357057	1
genus Coprococcus2	Acne	-0.00509656	0.337173	0.98794	1
genus Coprococcus3	Acne	0.419268	0.48454	0.38688	1
genus Eggerthella	Acne	-0.113672	0.333708	0.733379	1
genus Eisenbergiella	Acne	-0.734824	0.556328	0.186552	1
genus Enterorhabdus	Acne	-0.22709	0.491854	0.644295	0.988408
genus Erysipelatoclostridium	Acne	0.0312342	0.278881	0.910825	1
genus ErysipelotrichaceaeUCG003	Acne	0.195014	0.279936	0.48603	1
genus Escherichia.Shigella	Acne	-0.282065	0.541908	0.602712	1
genus Faecalibacterium	Acne	0.205026	0.362239	0.571396	1
genus FamilyXIIIAD3011group	Acne	-0.225796	0.381713	0.554163	1
genus Flavonifractor	Acne	-0.302652	0.266011	0.255227	1
genus Fusicatenibacter	Acne	0.840906	1.16764	0.471418	1
genus Haemophilus	Acne	1.56115	1.36833	0.253903	1
genus Holdemania	Acne	-0.563019	0.509653	0.269285	1
genus Intestinibacter	Acne	0.00807335	0.299704	0.978509	1
genus Lachnoclostridium	Acne	0.1533	0.254931	0.547614	1
genus Lachnospira	Acne	4.09078	2.1818	0.060798	1
genus LachnospiraceaeFCS020group	Acne	0.245853	0.21857	0.260664	1
genus LachnospiraceaeNC2004group	Acne	0.334184	0.458887	0.466462	1
genus LachnospiraceaeUCG004	Acne	0.251456	0.277042	0.364066	1
genus LachnospiraceaeUCG010	Acne	0.183472	0.406976	0.65212	0.967431
genus Marvinbryantia	Acne	2.29682	1.60759	0.153079	1
genus Methanobrevibacter	Acne	0.0196715	0.434418	0.963882	1
genus Olsenella	Acne	2.81783	2.42656	0.245541	1
genus Oscillospira	Acne	-0.307841	0.453944	0.497678	1
genus Parabacteroides	Acne	-0.136293	0.337845	0.686641	0.975753
genus Parasutterella	Acne	0.648097	0.690073	0.347643	1
genus Peptococcus	Acne	0.918397	1.06694	0.389363	1
genus Prevotella7	Acne	0.848772	0.686161	0.216092	1
genus RikenellaceaeRC9gutgroup	Acne	-0.0283901	0.402737	0.943801	1
genus Romboutsia	Acne	-0.00314344	0.387589	0.993529	1
genus Roseburia	Acne	0.447865	0.339952	0.187693	1
genus Ruminiclostridium9	Acne	0.120708	0.218095	0.579946	1
genus RuminococcaceaeNK4A214group	Acne	0.781855	0.48422	0.106383	1
genus RuminococcaceaeUCG002	Acne	0.468419	0.407922	0.250842	1
genus RuminococcaceaeUCG003	Acne	0.221834	0.460331	0.629877	0.977395
genus RuminococcaceaeUCG004	Acne	-0.0379457	0.425564	0.92895	1
genus RuminococcaceaeUCG005	Acne	-0.00920283	0.300707	0.975585	1
genus RuminococcaceaeUCG010	Acne	-0.401342	0.417297	0.336168	1
genus RuminococcaceaeUCG011	Acne	0.10844	2.155	0.959867	1
genus RuminococcaceaeUCG014	Acne	-0.474483	0.364619	0.193152	1
genus Ruminococcus2	Acne	0.289565	0.339472	0.393667	1
genus Sellimonas	Acne	0.0679359	0.308151	0.82551	1
genus Slackia	Acne	0.224108	0.280856	0.424903	1
genus Streptococcus	Acne	0.0618722	0.385501	0.872489	1
genus Subdoligranulum	Acne	0.365839	0.384733	0.34166	1
genus Sutterella	Acne	0.0459077	0.351654	0.896133	1
genus Terrisporobacter	Acne	0.119787	0.332121	0.718343	0.989555
genus Turicibacter	Acne	-0.162019	0.486009	0.738858	0.987582
genus Veillonella	Acne	0.778009	1.07425	0.468923	1
order Bacteroidales	Acne	-0.101629	0.398605	0.798753	1
order Bifidobacteriales	Acne	0.138238	0.213741	0.517792	1
order Burkholderiales	Acne	0.546998	0.785839	0.486386	1
order Clostridiales	Acne	0.301909	0.357497	0.398385	1
order Desulfovibrionales	Acne	0.204562	0.341043	0.548632	1
order Enterobacteriales	Acne	-0.39813	0.37102	0.28324	1
order Erysipelotrichales	Acne	0.611279	0.778766	0.432493	1
order Lactobacillales	Acne	-0.0973492	0.333018	0.770039	1
order Methanobacteriales	Acne	0.336084	0.660237	0.610728	0.993352
order MollicutesRF9	Acne	0.202339	0.731627	0.782118	1
order Rhodospirillales	Acne	-0.180289	0.432396	0.676711	0.971873
order Selenomonadales	Acne	0.532777	0.748207	0.47642	1
order Verrucomicrobiales	Acne	0.33315	0.296871	0.261774	1
phylum Actinobacteria	Acne	0.0569332	0.282088	0.840051	1
phylum Bacteroidetes	Acne	-0.0400144	0.40322	0.92095	1
phylum Cyanobacteria	Acne	-2.10651	1.21902	0.0839824	1
phylum Euryarchaeota	Acne	0.323925	0.42659	0.447652	1
phylum Firmicutes	Acne	0.438092	0.658797	0.506058	1
phylum Proteobacteria	Acne	-0.050625	0.306472	0.868797	1
phylum Tenericutes	Acne	-0.326305	0.571763	0.568203	1
phylum Verrucomicrobia	Acne	0.209248	0.290551	0.471415	1
Eukaryotic translation initiation factor 4E-binding protein 1 levels	Acne	0.511741	0.258763	0.0479692	0.173889
Adenosine Deaminase levels	Acne	0.990449	1.09979	0.36781	0.457136
Artemin levels	Acne	0.558184	0.544017	0.304872	0.401877
Axin-1 levels	Acne	0.189203	0.307004	0.537704	0.592155
beta-nerve growth factor levels	Acne	0.609373	0.224002	0.00652058	0.0630323
Caspase 8 levels	Acne	0.4352	0.342241	0.203509	0.340486
Eotaxin levels	Acne	0.451226	0.176522	0.0105819	0.0836935
C-C motif chemokine 19 levels	Acne	0.389014	0.165179	0.0185174	0.107401
C-C motif chemokine 20 levels	Acne	0.276294	0.191229	0.148504	0.269164
C-C motif chemokine 23 levels	Acne	0.654867	0.380217	0.085006	0.205431
C-C motif chemokine 25 levels	Acne	0.119388	0.215048	0.57878	0.629423
C-C motif chemokine 28 levels	Acne	0.464261	0.187218	0.0131461	0.0879778
C-C motif chemokine 4 levels	Acne	0.318204	0.185429	0.0861548	0.197249
Natural killer cell receptor 2B4 levels	Acne	0.215314	0.20639	0.296838	0.397307
CD40L receptor levels	Acne	0.589842	0.310036	0.0571059	0.177436
T-cell surface glycoprotein CD5 levels	Acne	0.173469	0.188654	0.357827	0.451174
T-cell surface glycoprotein CD6 isoform levels	Acne	0.0138049	0.223454	0.950738	0.950738
CUB domain-containing protein 1 levels	Acne	0.376134	0.197791	0.0572131	0.171639
Macrophage colony-stimulating factor 1 levels	Acne	0.412871	0.227749	0.0698578	0.178754
Cystatin D levels	Acne	0.29599	0.176004	0.0926222	0.206619
Fractalkine levels	Acne	0.536224	0.225027	0.0171753	0.106732
C-X-C motif chemokine 1 levels	Acne	0.230689	0.586129	0.69389	0.727331
C-X-C motif chemokine 10 levels	Acne	0.389476	0.194535	0.0452756	0.17126
C-X-C motif chemokine 11 levels	Acne	0.190526	0.175632	0.278011	0.38392
C-X-C motif chemokine 5 levels	Acne	0.0770839	0.24998	0.757808	0.784873
C-X-C motif chemokine 6 levels	Acne	0.442741	0.201266	0.0278221	0.127396
C-X-C motif chemokine 9 levels	Acne	0.12841	0.18731	0.492998	0.571877
Delta and Notch-like epidermal growth factor-related receptor levels	Acne	0.632369	0.211338	0.00276957	0.0344218
Protein S100-A12 levels	Acne	0.200211	0.238835	0.401874	0.492437
Fibroblast growth factor 19 levels	Acne	0.185274	0.223876	0.407912	0.492894
Fibroblast growth factor 21 levels	Acne	-0.0998692	0.180645	0.580367	0.623357
Fibroblast growth factor 23 levels	Acne	0.122596	0.191196	0.521389	0.581549
Fibroblast growth factor 5 levels	Acne	0.46356	0.333605	0.164667	0.28652
Fms-related tyrosine kinase 3 ligand levels	Acne	0.420527	0.152894	0.00595119	0.0647191
Glial cell line-derived neurotrophic factor levels	Acne	0.450466	0.243174	0.0639618	0.168626
Hepatocyte growth factor levels	Acne	0.292165	0.2714	0.281699	0.382935
Interferon gamma levels	Acne	1.35339	0.439923	0.00209497	0.0364525
Interleukin-10 levels	Acne	0.463217	0.23995	0.0535481	0.17918
Interleukin-10 receptor subunit alpha levels	Acne	0.4768	0.251721	0.0582042	0.168792
Interleukin-10 receptor subunit beta levels	Acne	0.248097	0.218613	0.25643	0.35983
Interleukin-12 subunit beta levels	Acne	0.301788	0.209911	0.150521	0.267251
Interleukin-15 receptor subunit alpha levels	Acne	1.3991	0.343324	4.6e-05	0.004002
Interleukin-17A levels	Acne	0.269042	0.17839	0.131512	0.260034
Interleukin-17C levels	Acne	0.0370586	0.192574	0.847399	0.857252
Interleukin-18 levels	Acne	0.265151	0.227738	0.244309	0.354248
interleukin-18 receptor 1 levels	Acne	0.379791	0.320965	0.236698	0.355047
Interleukin-1-alpha levels	Acne	1.12514	0.345759	0.00113747	0.0329865
Interleukin-2 levels	Acne	0.309868	0.258403	0.230464	0.364552
Interleukin-20 levels	Acne	1.08655	0.282323	0.000118787	0.00516723
Interleukin-22 receptor subunit alpha-1 levels	Acne	0.201131	0.313031	0.520531	0.588132
Interleukin-24 levels	Acne	1.38822	0.708761	0.0501524	0.17453
Interleukin-2 receptor subunit beta levels	Acne	0.580241	0.301097	0.0539687	0.173899
Interleukin-4 levels	Acne	0.567203	0.301937	0.0603061	0.163957
Interleukin-6 levels	Acne	0.325954	0.352846	0.355598	0.454956
Interleukin-7 levels	Acne	0.370491	0.249079	0.136898	0.26467
Interleukin-8 levels	Acne	0.434916	0.370529	0.240487	0.354616
Latency-associated peptide transforming growth factor beta 1 levels	Acne	0.60732	0.322232	0.0594663	0.166889
Leukemia inhibitory factor levels	Acne	0.968734	0.475247	0.0415121	0.164161
Leukemia inhibitory factor receptor levels	Acne	0.343316	0.276965	0.215136	0.346609
Monocyte chemoattractant protein-1 levels	Acne	0.590663	0.217206	0.00654065	0.0569036
Monocyte chemoattractant protein 2 levels	Acne	0.386831	0.252796	0.125964	0.267289
Monocyte chemoattractant protein-3 levels	Acne	0.24672	0.207385	0.234175	0.357425
Monocyte chemoattractant protein-4 levels	Acne	0.337795	0.165604	0.041373	0.171402
Macrophage inflammatory protein 1a levels	Acne	0.470758	0.208755	0.0241289	0.116623
Matrix metalloproteinase-1 levels	Acne	0.100398	0.244722	0.681621	0.723183
Matrix metalloproteinase-10 levels	Acne	-0.369351	0.292705	0.207001	0.339795
Neurturin levels	Acne	1.437	0.445516	0.00125766	0.0273541
Neurotrophin-3 levels	Acne	0.394884	0.267439	0.139799	0.264403
Osteoprotegerin levels	Acne	0.168724	0.233977	0.47084	0.553555
Oncostatin-M levels	Acne	0.213361	0.212588	0.315555	0.409751
Programmed cell death 1 ligand 1 levels	Acne	0.662646	0.218173	0.00238753	0.0346192
Stem cell factor levels	Acne	0.181499	0.156195	0.245234	0.349759
SIR2-like protein 2 levels	Acne	0.460203	0.386745	0.234071	0.363645
Signaling lymphocytic activation molecule levels	Acne	0.0427092	0.154486	0.782195	0.8006
Sulfotransferase 1A1 levels	Acne	0.657533	0.454008	0.147538	0.273102
STAM binding protein levels	Acne	0.626706	0.414271	0.130332	0.263695
Transforming growth factor-alpha levels	Acne	0.319931	0.210256	0.128103	0.265357
Tumor necrosis factor levels	Acne	1.58078	0.753355	0.0358766	0.156063
TNF-beta levels	Acne	0.594631	0.441862	0.178387	0.304307
Tumor necrosis factor receptor superfamily member 9 levels	Acne	0.130814	0.200154	0.51339	0.587697
Tumor necrosis factor ligand superfamily member 14 levels	Acne	0.219423	0.275856	0.426365	0.508134
TNF-related apoptosis-inducing ligand levels	Acne	0.318182	0.185249	0.0858722	0.201916
TNF-related activation-induced cytokine levels	Acne	0.259501	0.161649	0.10842	0.235813
Thymic stromal lymphopoietin levels	Acne	0.583341	0.255592	0.022471	0.114998
Tumor necrosis factor ligand superfamily member 12 levels	Acne	0.559019	0.223144	0.0122386	0.0887298
Urokinase-type plasminogen activator levels	Acne	0.376724	0.210891	0.0740434	0.184051
Vascular endothelial growth factor A levels	Acne	0.865725	0.37033	0.0194023	0.1055
class Actinobacteria	Allergic_contact_dermatitis	-0.0110904	0.24888	0.964457	0.97896
class Alphaproteobacteria	Allergic_contact_dermatitis	-0.894038	0.419876	0.03323	0.560757
class Bacilli	Allergic_contact_dermatitis	-0.135483	0.468251	0.772322	0.906639
class Bacteroidia	Allergic_contact_dermatitis	0.904169	0.459959	0.0493264	0.554922
class Betaproteobacteria	Allergic_contact_dermatitis	0.653283	0.776072	0.39991	0.805789
class Clostridia	Allergic_contact_dermatitis	-0.415425	0.424236	0.327466	0.749286
class Deltaproteobacteria	Allergic_contact_dermatitis	-0.401941	0.333944	0.228737	0.753159
class Erysipelotrichia	Allergic_contact_dermatitis	-0.391671	1.06582	0.713258	0.934853
class Gammaproteobacteria	Allergic_contact_dermatitis	-0.0172598	0.246424	0.944161	0.980475
class Methanobacteria	Allergic_contact_dermatitis	-0.909854	0.754682	0.227967	0.809882
class Mollicutes	Allergic_contact_dermatitis	0.66334	0.708295	0.349001	0.75992
class Negativicutes	Allergic_contact_dermatitis	-0.437478	0.894881	0.624936	0.937404
class Verrucomicrobiae	Allergic_contact_dermatitis	-0.674929	0.314619	0.0319351	0.718539
family Acidaminococcaceae	Allergic_contact_dermatitis	-0.6015	0.595394	0.312373	0.73983
family Alcaligenaceae	Allergic_contact_dermatitis	0.666271	0.682354	0.328852	0.739916
family Bacteroidaceae	Allergic_contact_dermatitis	0.392464	0.490655	0.423781	0.805782
family Bifidobacteriaceae	Allergic_contact_dermatitis	-0.167915	0.251956	0.505125	0.874254
family Christensenellaceae	Allergic_contact_dermatitis	-0.612953	0.339816	0.0712661	0.506364
family Clostridiaceae1	Allergic_contact_dermatitis	-0.1396	0.259333	0.590367	0.916087
family Desulfovibrionaceae	Allergic_contact_dermatitis	-0.404169	0.343148	0.238866	0.716599
family Enterobacteriaceae	Allergic_contact_dermatitis	-0.157247	0.379295	0.678452	0.934603
family Erysipelotrichaceae	Allergic_contact_dermatitis	-0.391671	1.06582	0.713258	0.925864
family FamilyXIII	Allergic_contact_dermatitis	-6.27296	2.79495	0.0248074	1
family Lachnospiraceae	Allergic_contact_dermatitis	-0.486625	0.418043	0.244402	0.702006
family Methanobacteriaceae	Allergic_contact_dermatitis	-0.911525	0.756242	0.228074	0.76975
family Peptostreptococcaceae	Allergic_contact_dermatitis	-0.380978	0.232428	0.101188	0.650496
family Porphyromonadaceae	Allergic_contact_dermatitis	-0.100805	0.333226	0.76226	0.902677
family Prevotellaceae	Allergic_contact_dermatitis	0.181535	0.512566	0.723212	0.904015
family Rhodospirillaceae	Allergic_contact_dermatitis	-0.632912	0.49868	0.204378	0.745704
family Ruminococcaceae	Allergic_contact_dermatitis	-0.367266	0.476727	0.441068	0.804651
family Streptococcaceae	Allergic_contact_dermatitis	-0.229702	0.353913	0.516316	0.839792
family Veillonellaceae	Allergic_contact_dermatitis	0.158116	0.432004	0.71436	0.909799
family Verrucomicrobiaceae	Allergic_contact_dermatitis	-0.677199	0.31479	0.0314546	0.849274
genus Clostridiuminnocuumgroup	Allergic_contact_dermatitis	-0.584467	0.503629	0.245841	0.691426
genus Eubacteriumbrachygroup	Allergic_contact_dermatitis	-1.37032	1.86219	0.461815	0.831267
genus Eubacteriumcoprostanoligenesgroup	Allergic_contact_dermatitis	-0.416712	0.50211	0.406583	0.795488
genus Eubacteriumeligensgroup	Allergic_contact_dermatitis	-0.120545	0.417753	0.772922	0.899521
genus Eubacteriumhalliigroup	Allergic_contact_dermatitis	-0.754376	0.530437	0.154974	0.674888
genus Eubacteriumoxidoreducensgroup	Allergic_contact_dermatitis	-0.181135	0.655587	0.782322	0.902679
genus Eubacteriumrectalegroup	Allergic_contact_dermatitis	-1.55878	0.982534	0.112627	0.633528
genus Eubacteriumruminantiumgroup	Allergic_contact_dermatitis	0.162627	0.355056	0.64693	0.929102
genus Eubacteriumxylanophilumgroup	Allergic_contact_dermatitis	0.0450135	0.371882	0.903657	0.960581
genus Ruminococcusgauvreauiigroup	Allergic_contact_dermatitis	-0.0858607	0.582267	0.882769	0.945824
genus Actinomyces	Allergic_contact_dermatitis	1.38207	0.870975	0.112556	0.660655
genus Adlercreutzia	Allergic_contact_dermatitis	0.00457094	0.830342	0.995608	0.995608
genus Akkermansia	Allergic_contact_dermatitis	-0.674193	0.312315	0.0308735	1
genus Alistipes	Allergic_contact_dermatitis	0.636292	1.2425	0.608578	0.933614
genus Allisonella	Allergic_contact_dermatitis	0.922928	0.91111	0.311074	0.763545
genus Anaerofilum	Allergic_contact_dermatitis	-0.0341579	0.662277	0.958866	0.980659
genus Anaerostipes	Allergic_contact_dermatitis	-0.0996481	0.320621	0.755955	0.903132
genus Anaerotruncus	Allergic_contact_dermatitis	0.28878	0.371159	0.43654	0.8073
genus Bacteroides	Allergic_contact_dermatitis	0.392464	0.490655	0.423781	0.79459
genus Barnesiella	Allergic_contact_dermatitis	-0.0625641	0.378564	0.868734	0.938233
genus Bifidobacterium	Allergic_contact_dermatitis	-0.189891	0.264726	0.473182	0.84052
genus Bilophila	Allergic_contact_dermatitis	-0.138099	0.394966	0.726603	0.899922
genus Blautia	Allergic_contact_dermatitis	-0.349861	0.328594	0.287002	0.774907
genus Butyricicoccus	Allergic_contact_dermatitis	1.05823	1.62686	0.515386	0.848501
genus Butyricimonas	Allergic_contact_dermatitis	0.719525	0.467072	0.123438	0.666567
genus Catenibacterium	Allergic_contact_dermatitis	-0.112243	2.60974	0.965694	0.972901
genus ChristensenellaceaeR.7group	Allergic_contact_dermatitis	-0.398501	0.304135	0.190102	0.712884
genus Clostridiumsensustricto1	Allergic_contact_dermatitis	-0.117559	0.271258	0.664735	0.925147
genus Collinsella	Allergic_contact_dermatitis	-3.38259	1.9942	0.0898462	0.606462
genus Coprobacter	Allergic_contact_dermatitis	-0.420833	0.396983	0.28911	0.76529
genus Coprococcus1	Allergic_contact_dermatitis	-1.13627	0.695027	0.102078	0.626386
genus Coprococcus2	Allergic_contact_dermatitis	-0.0494525	0.413396	0.90478	0.954261
genus Coprococcus3	Allergic_contact_dermatitis	-1.08005	0.581597	0.0633062	0.474796
genus Eggerthella	Allergic_contact_dermatitis	0.081005	0.346403	0.815105	0.916993
genus Eisenbergiella	Allergic_contact_dermatitis	0.705245	0.689739	0.306554	0.780845
genus Enterorhabdus	Allergic_contact_dermatitis	-0.158029	0.588239	0.788201	0.901755
genus Erysipelatoclostridium	Allergic_contact_dermatitis	-0.414782	0.353565	0.240738	0.706514
genus ErysipelotrichaceaeUCG003	Allergic_contact_dermatitis	-0.152816	0.346188	0.658905	0.926585
genus Escherichia.Shigella	Allergic_contact_dermatitis	-0.267262	0.558581	0.632318	0.927858
genus Faecalibacterium	Allergic_contact_dermatitis	0.431605	0.42578	0.310735	0.776838
genus FamilyXIIIAD3011group	Allergic_contact_dermatitis	-0.790364	0.42148	0.0607635	0.482534
genus Flavonifractor	Allergic_contact_dermatitis	0.632805	0.318565	0.0469863	0.634315
genus Fusicatenibacter	Allergic_contact_dermatitis	-1.11828	1.3138	0.394668	0.807276
genus Haemophilus	Allergic_contact_dermatitis	2.06523	1.556	0.18442	0.711334
genus Holdemania	Allergic_contact_dermatitis	1.13611	0.592054	0.0549927	0.494935
genus Intestinibacter	Allergic_contact_dermatitis	-0.222362	0.376979	0.55529	0.871677
genus Lachnoclostridium	Allergic_contact_dermatitis	0.244748	0.284527	0.389682	0.80934
genus Lachnospira	Allergic_contact_dermatitis	0.572194	2.65736	0.829515	0.925492
genus LachnospiraceaeFCS020group	Allergic_contact_dermatitis	-0.312424	0.230027	0.174398	0.713446
genus LachnospiraceaeNC2004group	Allergic_contact_dermatitis	-0.703049	0.482036	0.144703	0.697674
genus LachnospiraceaeUCG004	Allergic_contact_dermatitis	0.187506	0.294627	0.524504	0.842952
genus LachnospiraceaeUCG010	Allergic_contact_dermatitis	0.545667	0.4931	0.268465	0.739648
genus Marvinbryantia	Allergic_contact_dermatitis	-1.81074	1.8084	0.316685	0.737111
genus Methanobrevibacter	Allergic_contact_dermatitis	-0.308814	0.511632	0.546119	0.867365
genus Olsenella	Allergic_contact_dermatitis	-0.586428	2.85317	0.837153	0.918827
genus Oscillospira	Allergic_contact_dermatitis	-0.174823	0.475723	0.713255	0.944014
genus Parabacteroides	Allergic_contact_dermatitis	-0.334908	0.498452	0.50165	0.879516
genus Parasutterella	Allergic_contact_dermatitis	-0.947724	0.937723	0.312177	0.752569
genus Peptococcus	Allergic_contact_dermatitis	0.546077	1.21163	0.652208	0.926822
genus Prevotella7	Allergic_contact_dermatitis	0.214613	0.6874	0.754881	0.909902
genus RikenellaceaeRC9gutgroup	Allergic_contact_dermatitis	-0.170415	0.494691	0.73048	0.888422
genus Romboutsia	Allergic_contact_dermatitis	-0.859179	0.448352	0.0553265	0.466817
genus Roseburia	Allergic_contact_dermatitis	-0.277047	0.418974	0.50845	0.85801
genus Ruminiclostridium9	Allergic_contact_dermatitis	-0.293187	0.219779	0.1822	0.723442
genus RuminococcaceaeNK4A214group	Allergic_contact_dermatitis	-1.21473	0.525418	0.0207813	1
genus RuminococcaceaeUCG002	Allergic_contact_dermatitis	-0.179264	0.486379	0.71245	0.952284
genus RuminococcaceaeUCG003	Allergic_contact_dermatitis	-0.186759	0.535474	0.727259	0.892545
genus RuminococcaceaeUCG004	Allergic_contact_dermatitis	-0.0908349	0.508218	0.858148	0.934274
genus RuminococcaceaeUCG005	Allergic_contact_dermatitis	-0.40768	0.339237	0.229458	0.737545
genus RuminococcaceaeUCG010	Allergic_contact_dermatitis	0.126908	0.504123	0.801243	0.908973
genus RuminococcaceaeUCG011	Allergic_contact_dermatitis	1.23413	2.62716	0.638529	0.926896
genus RuminococcaceaeUCG014	Allergic_contact_dermatitis	-0.338379	0.422039	0.422685	0.815178
genus Ruminococcus2	Allergic_contact_dermatitis	-0.496581	0.347431	0.15292	0.688141
genus Sellimonas	Allergic_contact_dermatitis	-0.140566	0.35707	0.693827	0.936666
genus Slackia	Allergic_contact_dermatitis	-0.282783	0.337303	0.401825	0.797742
genus Streptococcus	Allergic_contact_dermatitis	-0.23117	0.46377	0.618161	0.93766
genus Subdoligranulum	Allergic_contact_dermatitis	-0.912659	0.470973	0.0526457	0.507655
genus Sutterella	Allergic_contact_dermatitis	0.570593	0.395766	0.149375	0.695366
genus Terrisporobacter	Allergic_contact_dermatitis	0.0784489	0.364635	0.829655	0.918061
genus Turicibacter	Allergic_contact_dermatitis	0.857793	0.578538	0.138157	0.690783
genus Veillonella	Allergic_contact_dermatitis	0.160988	1.40484	0.908766	0.951035
order Bacteroidales	Allergic_contact_dermatitis	0.904427	0.460072	0.0493171	0.605256
order Bifidobacteriales	Allergic_contact_dermatitis	-0.167915	0.251956	0.505125	0.863188
order Burkholderiales	Allergic_contact_dermatitis	0.784081	0.901618	0.384499	0.811052
order Clostridiales	Allergic_contact_dermatitis	-0.406546	0.417812	0.330537	0.731515
order Desulfovibrionales	Allergic_contact_dermatitis	-0.404077	0.336779	0.230206	0.722741
order Enterobacteriales	Allergic_contact_dermatitis	-0.157247	0.379295	0.678452	0.925162
order Erysipelotrichales	Allergic_contact_dermatitis	-0.391671	1.06582	0.713258	0.917046
order Lactobacillales	Allergic_contact_dermatitis	-0.154497	0.432397	0.720864	0.909501
order Methanobacteriales	Allergic_contact_dermatitis	-0.909854	0.754682	0.227967	0.789116
order MollicutesRF9	Allergic_contact_dermatitis	0.951162	0.901665	0.291473	0.75671
order Rhodospirillales	Allergic_contact_dermatitis	-0.648627	0.541218	0.230738	0.707947
order Selenomonadales	Allergic_contact_dermatitis	-0.437478	0.894881	0.624936	0.927102
order Verrucomicrobiales	Allergic_contact_dermatitis	-0.674929	0.314619	0.0319351	0.615891
phylum Actinobacteria	Allergic_contact_dermatitis	-0.718349	0.35165	0.0410728	0.616092
phylum Bacteroidetes	Allergic_contact_dermatitis	0.906078	0.467186	0.0524483	0.544655
phylum Cyanobacteria	Allergic_contact_dermatitis	0.854111	1.30451	0.512637	0.854395
phylum Euryarchaeota	Allergic_contact_dermatitis	-0.653784	0.479825	0.173025	0.729949
phylum Firmicutes	Allergic_contact_dermatitis	-1.32171	0.87052	0.128939	0.66949
phylum Proteobacteria	Allergic_contact_dermatitis	0.0212821	0.322572	0.947397	0.976325
phylum Tenericutes	Allergic_contact_dermatitis	0.66334	0.708295	0.349001	0.747858
phylum Verrucomicrobia	Allergic_contact_dermatitis	-0.755108	0.321524	0.0188477	1
Eukaryotic translation initiation factor 4E-binding protein 1 levels	Allergic_conttact	0.503625	0.247587	0.041938	0.608102
Adenosine Deaminase levels	Allergic_conttact	2.03292	1.07719	0.059128	0.571571
Artemin levels	Allergic_conttact	0.554672	0.697005	0.426152	0.674095
Axin-1 levels	Allergic_conttact	0.513868	0.35154	0.143806	0.695063
beta-nerve growth factor levels	Allergic_conttact	0.260479	0.263954	0.323723	0.625865
Caspase 8 levels	Allergic_conttact	0.308388	0.359803	0.391389	0.654824
Eotaxin levels	Allergic_conttact	-0.0292035	0.198132	0.882821	0.925367
C-C motif chemokine 19 levels	Allergic_conttact	0.147232	0.19586	0.452221	0.666834
C-C motif chemokine 20 levels	Allergic_conttact	-0.332313	0.22339	0.136859	0.744172
C-C motif chemokine 23 levels	Allergic_conttact	1.03328	0.421383	0.0142019	0.411855
C-C motif chemokine 25 levels	Allergic_conttact	-0.346413	0.23999	0.148894	0.647691
C-C motif chemokine 28 levels	Allergic_conttact	0.234667	0.225971	0.299045	0.650422
C-C motif chemokine 4 levels	Allergic_conttact	0.140723	0.204799	0.492002	0.658526
Natural killer cell receptor 2B4 levels	Allergic_conttact	0.214939	0.216787	0.321454	0.635602
CD40L receptor levels	Allergic_conttact	0.267918	0.367094	0.465491	0.663898
T-cell surface glycoprotein CD5 levels	Allergic_conttact	0.152771	0.196974	0.437993	0.668515
T-cell surface glycoprotein CD6 isoform levels	Allergic_conttact	-0.240646	0.255393	0.34606	0.640578
CUB domain-containing protein 1 levels	Allergic_conttact	0.382316	0.233326	0.101308	0.629557
Macrophage colony-stimulating factor 1 levels	Allergic_conttact	0.494467	0.249304	0.0473239	0.514647
Cystatin D levels	Allergic_conttact	-0.170575	0.188489	0.365485	0.662441
Fractalkine levels	Allergic_conttact	-0.191838	0.297664	0.519265	0.67427
C-X-C motif chemokine 1 levels	Allergic_conttact	0.88708	0.774876	0.252291	0.627123
C-X-C motif chemokine 10 levels	Allergic_conttact	0.189183	0.214537	0.377875	0.670921
C-X-C motif chemokine 11 levels	Allergic_conttact	0.27282	0.213574	0.201459	0.625962
C-X-C motif chemokine 5 levels	Allergic_conttact	0.288191	0.27932	0.302185	0.641222
C-X-C motif chemokine 6 levels	Allergic_conttact	0.426009	0.227924	0.0616116	0.536021
C-X-C motif chemokine 9 levels	Allergic_conttact	0.153767	0.223007	0.490499	0.677355
Delta and Notch-like epidermal growth factor-related receptor levels	Allergic_conttact	-0.0391742	0.250125	0.875546	0.928933
Protein S100-A12 levels	Allergic_conttact	0.235628	0.293259	0.421697	0.6794
Fibroblast growth factor 19 levels	Allergic_conttact	0.322299	0.219515	0.142042	0.726921
Fibroblast growth factor 21 levels	Allergic_conttact	0.244848	0.217836	0.261012	0.597579
Fibroblast growth factor 23 levels	Allergic_conttact	0.264092	0.217265	0.224164	0.650077
Fibroblast growth factor 5 levels	Allergic_conttact	0.459048	0.390874	0.240229	0.653124
Fms-related tyrosine kinase 3 ligand levels	Allergic_conttact	-0.0427399	0.168212	0.799432	0.869382
Glial cell line-derived neurotrophic factor levels	Allergic_conttact	-0.195367	0.223116	0.381232	0.663344
Hepatocyte growth factor levels	Allergic_conttact	0.460679	0.317698	0.147043	0.673304
Interferon gamma levels	Allergic_conttact	0.879005	0.516495	0.0887806	0.643659
Interleukin-10 levels	Allergic_conttact	-0.0598794	0.264351	0.820801	0.881602
Interleukin-10 receptor subunit alpha levels	Allergic_conttact	0.263896	0.258973	0.308199	0.623565
Interleukin-10 receptor subunit beta levels	Allergic_conttact	0.298255	0.248332	0.229738	0.644748
Interleukin-12 subunit beta levels	Allergic_conttact	0.157303	0.221502	0.477604	0.670186
Interleukin-15 receptor subunit alpha levels	Allergic_conttact	0.557617	0.430609	0.195338	0.629422
Interleukin-17A levels	Allergic_conttact	0.369981	0.230163	0.10795	0.626112
Interleukin-17C levels	Allergic_conttact	-0.0137458	0.221433	0.950502	0.961554
Interleukin-18 levels	Allergic_conttact	0.359265	0.259198	0.165727	0.626881
interleukin-18 receptor 1 levels	Allergic_conttact	0.663458	0.362105	0.0669182	0.529262
Interleukin-1-alpha levels	Allergic_conttact	-0.155107	0.416864	0.709832	0.823405
Interleukin-2 levels	Allergic_conttact	-0.110437	0.325088	0.734072	0.829406
Interleukin-20 levels	Allergic_conttact	0.0183041	0.316591	0.953895	0.953895
Interleukin-22 receptor subunit alpha-1 levels	Allergic_conttact	0.125746	0.343688	0.71446	0.817868
Interleukin-24 levels	Allergic_conttact	0.623638	0.796026	0.433369	0.67327
Interleukin-2 receptor subunit beta levels	Allergic_conttact	0.702348	0.296869	0.0179887	0.391255
Interleukin-4 levels	Allergic_conttact	-0.347695	0.337205	0.30249	0.626586
Interleukin-6 levels	Allergic_conttact	0.478192	0.420534	0.255493	0.617442
Interleukin-7 levels	Allergic_conttact	0.188613	0.276897	0.495765	0.653508
Interleukin-8 levels	Allergic_conttact	0.468313	0.41701	0.261426	0.583182
Latency-associated peptide transforming growth factor beta 1 levels	Allergic_conttact	1.09109	0.393364	0.00554143	0.482104
Leukemia inhibitory factor levels	Allergic_conttact	0.76031	0.536516	0.156446	0.618674
Leukemia inhibitory factor receptor levels	Allergic_conttact	0.244755	0.324351	0.450489	0.675734
Monocyte chemoattractant protein-1 levels	Allergic_conttact	0.531909	0.266065	0.0455897	0.566615
Monocyte chemoattractant protein 2 levels	Allergic_conttact	0.260431	0.304223	0.39197	0.643422
Monocyte chemoattractant protein-3 levels	Allergic_conttact	0.292362	0.236958	0.217273	0.651819
Monocyte chemoattractant protein-4 levels	Allergic_conttact	0.489337	0.188003	0.00924612	0.402206
Macrophage inflammatory protein 1a levels	Allergic_conttact	0.55543	0.256455	0.0303267	0.527685
Matrix metalloproteinase-1 levels	Allergic_conttact	0.154154	0.296562	0.6032	0.739133
Matrix metalloproteinase-10 levels	Allergic_conttact	0.220614	0.301817	0.464807	0.67397
Neurturin levels	Allergic_conttact	-0.15519	0.513654	0.762553	0.85054
Neurotrophin-3 levels	Allergic_conttact	-0.0329086	0.252638	0.896361	0.917452
Osteoprotegerin levels	Allergic_conttact	0.191811	0.223667	0.391128	0.667218
Oncostatin-M levels	Allergic_conttact	0.160308	0.255093	0.529722	0.677733
Programmed cell death 1 ligand 1 levels	Allergic_conttact	0.174264	0.252928	0.490831	0.667224
Stem cell factor levels	Allergic_conttact	-0.0245895	0.181249	0.892084	0.923945
SIR2-like protein 2 levels	Allergic_conttact	0.550688	0.413646	0.18309	0.637152
Signaling lymphocytic activation molecule levels	Allergic_conttact	0.188753	0.196788	0.337472	0.638262
Sulfotransferase 1A1 levels	Allergic_conttact	0.306869	0.513295	0.549945	0.683504
STAM binding protein levels	Allergic_conttact	0.47341	0.416923	0.256171	0.602349
Transforming growth factor-alpha levels	Allergic_conttact	0.293572	0.226637	0.195202	0.653177
Tumor necrosis factor levels	Allergic_conttact	-0.281136	0.956555	0.768831	0.846687
TNF-beta levels	Allergic_conttact	0.20797	0.520169	0.689295	0.810388
Tumor necrosis factor receptor superfamily member 9 levels	Allergic_conttact	0.306626	0.213811	0.151544	0.627824
Tumor necrosis factor ligand superfamily member 14 levels	Allergic_conttact	0.15164	0.365177	0.677959	0.807978
TNF-related apoptosis-inducing ligand levels	Allergic_conttact	-0.119281	0.19447	0.539636	0.68041
TNF-related activation-induced cytokine levels	Allergic_conttact	-0.0782354	0.185667	0.673482	0.813791
Thymic stromal lymphopoietin levels	Allergic_conttact	-0.311105	0.269517	0.248375	0.654806
Tumor necrosis factor ligand superfamily member 12 levels	Allergic_conttact	0.413632	0.24544	0.0919374	0.615273
Urokinase-type plasminogen activator levels	Allergic_conttact	0.314011	0.228257	0.168919	0.61233
Vascular endothelial growth factor A levels	Allergic_conttact	0.468501	0.40843	0.251349	0.643159
class Actinobacteria	Eczema	0.148706	0.117523	0.205751	0.712216
class Alphaproteobacteria	Eczema	-0.225003	0.224211	0.315604	0.819357
class Bacilli	Eczema	-0.129345	0.250595	0.605749	0.939956
class Bacteroidia	Eczema	0.348102	0.225996	0.123487	0.574854
class Betaproteobacteria	Eczema	0.640881	0.383584	0.0947671	0.556242
class Clostridia	Eczema	0.195027	0.206069	0.343937	0.859841
class Deltaproteobacteria	Eczema	-0.0464282	0.186295	0.803191	0.951148
class Erysipelotrichia	Eczema	-0.274213	0.480001	0.567813	0.958184
class Gammaproteobacteria	Eczema	-0.282573	0.120691	0.0192168	0.648568
class Methanobacteria	Eczema	-0.152332	0.361113	0.673141	0.946605
class Mollicutes	Eczema	0.833419	0.395025	0.0348769	0.523153
class Negativicutes	Eczema	-0.0368694	0.411241	0.928562	0.994888
class Verrucomicrobiae	Eczema	-0.26777	0.174678	0.125292	0.545628
family Acidaminococcaceae	Eczema	0.233792	0.315348	0.458465	0.93777
family Alcaligenaceae	Eczema	0.641701	0.320097	0.0449947	0.552207
family Bacteroidaceae	Eczema	0.130036	0.260346	0.617445	0.947217
family Bifidobacteriaceae	Eczema	0.142648	0.124165	0.250613	0.751839
family Christensenellaceae	Eczema	-0.143292	0.184005	0.436133	0.934571
family Clostridiaceae1	Eczema	0.0175953	0.124497	0.887608	0.98219
family Desulfovibrionaceae	Eczema	-0.0455229	0.191544	0.812143	0.945166
family Enterobacteriaceae	Eczema	-0.429852	0.187769	0.0220641	0.59573
family Erysipelotrichaceae	Eczema	-0.274213	0.480001	0.567813	0.946355
family FamilyXIII	Eczema	-1.04741	1.46712	0.475275	0.929885
family Lachnospiraceae	Eczema	0.127563	0.192262	0.507021	0.924971
family Methanobacteriaceae	Eczema	-0.152767	0.361863	0.672901	0.956228
family Peptostreptococcaceae	Eczema	0.0347478	0.110886	0.754003	0.951312
family Porphyromonadaceae	Eczema	0.0421304	0.144786	0.771063	0.954987
family Prevotellaceae	Eczema	0.431408	0.231803	0.0627297	0.529282
family Rhodospirillaceae	Eczema	-0.00711106	0.306833	0.98151	0.99627
family Ruminococcaceae	Eczema	0.16566	0.235104	0.481045	0.914664
family Streptococcaceae	Eczema	-0.165426	0.190972	0.386364	0.86932
family Veillonellaceae	Eczema	-0.0261785	0.196636	0.894089	0.981317
family Verrucomicrobiaceae	Eczema	-0.268257	0.174749	0.124759	0.561417
genus Clostridiuminnocuumgroup	Eczema	-0.0456259	0.260931	0.861191	0.96884
genus Eubacteriumbrachygroup	Eczema	-1.47053	0.900329	0.102401	0.552965
genus Eubacteriumcoprostanoligenesgroup	Eczema	0.15635	0.242781	0.519576	0.922931
genus Eubacteriumeligensgroup	Eczema	0.0218168	0.241953	0.928152	1
genus Eubacteriumhalliigroup	Eczema	-0.161775	0.229032	0.479975	0.925666
genus Eubacteriumoxidoreducensgroup	Eczema	0.195998	0.376516	0.602675	0.94606
genus Eubacteriumrectalegroup	Eczema	0.162509	0.480445	0.735177	0.945228
genus Eubacteriumruminantiumgroup	Eczema	0.411212	0.224267	0.0667162	0.474036
genus Eubacteriumxylanophilumgroup	Eczema	0.155593	0.151611	0.304766	0.806735
genus Ruminococcusgauvreauiigroup	Eczema	-0.0801702	0.300662	0.789742	0.951921
genus Actinomyces	Eczema	0.210348	0.395678	0.594993	0.944988
genus Adlercreutzia	Eczema	-0.015139	0.44007	0.972557	1
genus Akkermansia	Eczema	-0.265515	0.173566	0.126076	0.515765
genus Alistipes	Eczema	-0.580694	0.643464	0.366818	0.86878
genus Allisonella	Eczema	-0.30829	0.453031	0.496185	0.917602
genus Anaerofilum	Eczema	-0.0697904	0.334984	0.834964	0.955255
genus Anaerostipes	Eczema	-0.00105681	0.147615	0.994288	0.994288
genus Anaerotruncus	Eczema	0.34891	0.190095	0.0664387	0.49829
genus Bacteroides	Eczema	0.130036	0.260346	0.617445	0.936574
genus Barnesiella	Eczema	0.205594	0.188332	0.274983	0.742454
genus Bifidobacterium	Eczema	0.142797	0.126462	0.258828	0.727953
genus Bilophila	Eczema	-0.104092	0.244114	0.669812	0.961964
genus Blautia	Eczema	-0.172843	0.135091	0.200734	0.732408
genus Butyricicoccus	Eczema	0.943547	0.804729	0.240995	0.774627
genus Butyricimonas	Eczema	0.212694	0.250772	0.396349	0.877166
genus Catenibacterium	Eczema	-0.3884	1.13595	0.732413	0.959959
genus ChristensenellaceaeR.7group	Eczema	-0.108554	0.158668	0.493873	0.926013
genus Clostridiumsensustricto1	Eczema	0.0403467	0.13195	0.759777	0.949721
genus Collinsella	Eczema	-1.56777	0.934559	0.0934357	0.573356
genus Coprobacter	Eczema	-0.141082	0.196586	0.472964	0.938973
genus Coprococcus1	Eczema	-0.353639	0.387484	0.361424	0.887131
genus Coprococcus2	Eczema	0.300848	0.18485	0.103625	0.538052
genus Coprococcus3	Eczema	0.160002	0.292705	0.584632	0.939588
genus Eggerthella	Eczema	0.0828855	0.199511	0.677818	0.933729
genus Eisenbergiella	Eczema	0.118678	0.321457	0.711988	0.942337
genus Enterorhabdus	Eczema	0.00906042	0.296338	0.975609	1
genus Erysipelatoclostridium	Eczema	-0.0643806	0.163617	0.693963	0.93685
genus ErysipelotrichaceaeUCG003	Eczema	-0.202953	0.18387	0.269685	0.743009
genus Escherichia.Shigella	Eczema	-0.678542	0.272586	0.0128004	0.576017
genus Faecalibacterium	Eczema	0.377268	0.208751	0.0707218	0.477372
genus FamilyXIIIAD3011group	Eczema	-0.281884	0.210088	0.179679	0.673796
genus Flavonifractor	Eczema	-0.11116	0.180761	0.538582	0.944267
genus Fusicatenibacter	Eczema	0.755672	0.649016	0.244289	0.766953
genus Haemophilus	Eczema	0.934315	0.731731	0.201653	0.716399
genus Holdemania	Eczema	-0.2674	0.304919	0.380512	0.885675
genus Intestinibacter	Eczema	-0.0572499	0.169816	0.736019	0.937383
genus Lachnoclostridium	Eczema	-0.158889	0.139095	0.253328	0.727643
genus Lachnospira	Eczema	2.37163	1.23669	0.0551453	0.531758
genus LachnospiraceaeFCS020group	Eczema	-0.13348	0.108838	0.220044	0.742649
genus LachnospiraceaeNC2004group	Eczema	0.316642	0.273438	0.246863	0.75742
genus LachnospiraceaeUCG004	Eczema	0.379197	0.16931	0.0251131	0.484324
genus LachnospiraceaeUCG010	Eczema	0.212827	0.244522	0.384094	0.87886
genus Marvinbryantia	Eczema	0.253844	0.989791	0.797594	0.952878
genus Methanobrevibacter	Eczema	-0.184292	0.239907	0.442381	0.933146
genus Olsenella	Eczema	-0.669361	1.45149	0.644688	0.967032
genus Oscillospira	Eczema	-0.223392	0.246046	0.363918	0.877302
genus Parabacteroides	Eczema	-0.0943454	0.217392	0.664298	0.964303
genus Parasutterella	Eczema	-0.729081	0.439094	0.09683	0.544669
genus Peptococcus	Eczema	-0.271753	0.593533	0.647056	0.959918
genus Prevotella7	Eczema	-0.0259717	0.378881	0.945349	0.997048
genus RikenellaceaeRC9gutgroup	Eczema	0.135416	0.235497	0.565276	0.965978
genus Romboutsia	Eczema	0.104816	0.236938	0.658216	0.965861
genus Roseburia	Eczema	0.336835	0.224106	0.132835	0.512365
genus Ruminiclostridium9	Eczema	-0.0289581	0.103486	0.779611	0.956795
genus RuminococcaceaeNK4A214group	Eczema	0.00620697	0.291221	0.982995	0.990331
genus RuminococcaceaeUCG002	Eczema	0.188056	0.25017	0.452223	0.939233
genus RuminococcaceaeUCG003	Eczema	0.0740648	0.26927	0.783272	0.952628
genus RuminococcaceaeUCG004	Eczema	-0.166724	0.285734	0.559561	0.968471
genus RuminococcaceaeUCG005	Eczema	0.0617893	0.180892	0.732666	0.951057
genus RuminococcaceaeUCG010	Eczema	0.0239708	0.238121	0.919815	1
genus RuminococcaceaeUCG011	Eczema	3.71515	1.27966	0.00369336	0.498604
genus RuminococcaceaeUCG014	Eczema	-0.150983	0.204877	0.461154	0.929192
genus Ruminococcus2	Eczema	0.033079	0.210067	0.874875	0.976101
genus Sellimonas	Eczema	-0.323447	0.174959	0.0645011	0.512214
genus Slackia	Eczema	-0.323312	0.170867	0.0584659	0.526193
genus Streptococcus	Eczema	-0.143917	0.255603	0.573402	0.932642
genus Subdoligranulum	Eczema	-0.503105	0.19536	0.0100161	0.676085
genus Sutterella	Eczema	0.243161	0.205708	0.237177	0.78095
genus Terrisporobacter	Eczema	-0.158284	0.199611	0.427801	0.931503
genus Turicibacter	Eczema	0.457572	0.287355	0.111304	0.55652
genus Veillonella	Eczema	-0.160828	0.805644	0.841773	0.954953
order Bacteroidales	Eczema	0.348208	0.226052	0.123466	0.59528
order Bifidobacteriales	Eczema	0.142648	0.124165	0.250613	0.735494
order Burkholderiales	Eczema	0.762483	0.434632	0.0793762	0.510276
order Clostridiales	Eczema	0.196732	0.203231	0.333035	0.848298
order Desulfovibrionales	Eczema	-0.046492	0.187115	0.803773	0.943559
order Enterobacteriales	Eczema	-0.429852	0.187769	0.0220641	0.496442
order Erysipelotrichales	Eczema	-0.274213	0.480001	0.567813	0.934814
order Lactobacillales	Eczema	-0.154022	0.234442	0.511199	0.920159
order Methanobacteriales	Eczema	-0.152332	0.361113	0.673141	0.936846
order MollicutesRF9	Eczema	1.02073	0.510828	0.045697	0.514091
order Rhodospirillales	Eczema	-0.00783735	0.322918	0.980637	1
order Selenomonadales	Eczema	-0.0368694	0.411241	0.928562	0.987054
order Verrucomicrobiales	Eczema	-0.26777	0.174678	0.125292	0.528577
phylum Actinobacteria	Eczema	0.00767686	0.147683	0.958543	1
phylum Bacteroidetes	Eczema	0.345724	0.228972	0.131071	0.520428
phylum Cyanobacteria	Eczema	0.283578	0.757963	0.708306	0.946746
phylum Euryarchaeota	Eczema	-0.097204	0.238653	0.683786	0.932435
phylum Firmicutes	Eczema	0.0828087	0.375386	0.825407	0.952393
phylum Proteobacteria	Eczema	-0.341599	0.153964	0.026507	0.447305
phylum Tenericutes	Eczema	0.833419	0.395025	0.0348769	0.470838
phylum Verrucomicrobia	Eczema	-0.340893	0.17152	0.0468687	0.486714
Eukaryotic translation initiation factor 4E-binding protein 1 levels	Eczema	0.0839088	0.140582	0.550597	0.855391
Adenosine Deaminase levels	Eczema	-0.129708	0.610429	0.831727	0.915953
Artemin levels	Eczema	0.454882	0.30431	0.134968	0.782813
Axin-1 levels	Eczema	0.0444938	0.169986	0.793514	0.932916
beta-nerve growth factor levels	Eczema	-0.0414532	0.140424	0.76784	0.915097
Caspase 8 levels	Eczema	0.143587	0.197181	0.466493	0.845518
Eotaxin levels	Eczema	-0.0506825	0.10774	0.638059	0.867362
C-C motif chemokine 19 levels	Eczema	-0.0615001	0.0871243	0.480257	0.835647
C-C motif chemokine 20 levels	Eczema	0.0722629	0.112317	0.519977	0.869961
C-C motif chemokine 23 levels	Eczema	0.00765259	0.205772	0.970334	0.993165
C-C motif chemokine 25 levels	Eczema	-0.152037	0.122124	0.213155	0.74178
C-C motif chemokine 28 levels	Eczema	0.162123	0.113206	0.152113	0.778462
C-C motif chemokine 4 levels	Eczema	-0.0958547	0.0974912	0.325502	0.832903
Natural killer cell receptor 2B4 levels	Eczema	0.100525	0.121313	0.407309	0.80536
CD40L receptor levels	Eczema	0.101216	0.177668	0.568888	0.853332
T-cell surface glycoprotein CD5 levels	Eczema	-0.00613237	0.102435	0.952262	0.986272
T-cell surface glycoprotein CD6 isoform levels	Eczema	-0.110929	0.12135	0.360654	0.871581
CUB domain-containing protein 1 levels	Eczema	0.153634	0.120223	0.201284	0.729655
Macrophage colony-stimulating factor 1 levels	Eczema	0.0990996	0.119568	0.40721	0.823891
Cystatin D levels	Eczema	-0.138398	0.100132	0.166925	0.764342
Fractalkine levels	Eczema	-0.224364	0.146361	0.12529	0.838477
C-X-C motif chemokine 1 levels	Eczema	-0.160636	0.353216	0.649267	0.869019
C-X-C motif chemokine 10 levels	Eczema	0.0171621	0.106166	0.871578	0.93614
C-X-C motif chemokine 11 levels	Eczema	0.143195	0.10538	0.174197	0.721671
C-X-C motif chemokine 5 levels	Eczema	-0.124303	0.147297	0.39873	0.846085
C-X-C motif chemokine 6 levels	Eczema	0.0426461	0.117995	0.717784	0.905032
C-X-C motif chemokine 9 levels	Eczema	0.0532253	0.110677	0.630584	0.884852
Delta and Notch-like epidermal growth factor-related receptor levels	Eczema	-0.238774	0.127032	0.060158	0.747678
Protein S100-A12 levels	Eczema	0.139574	0.140936	0.32201	0.848935
Fibroblast growth factor 19 levels	Eczema	0.25122	0.126572	0.0471663	1
Fibroblast growth factor 21 levels	Eczema	0.065026	0.123292	0.597905	0.881657
Fibroblast growth factor 23 levels	Eczema	-0.0106504	0.10871	0.921955	0.966387
Fibroblast growth factor 5 levels	Eczema	0.19491	0.18826	0.300518	0.84339
Fms-related tyrosine kinase 3 ligand levels	Eczema	-0.0788862	0.0992484	0.426709	0.789866
Glial cell line-derived neurotrophic factor levels	Eczema	0.0746405	0.142737	0.601027	0.857202
Hepatocyte growth factor levels	Eczema	0.105413	0.171393	0.538529	0.867629
Interferon gamma levels	Eczema	0.614394	0.238445	0.00997575	0.433945
Interleukin-10 levels	Eczema	-0.0647721	0.13735	0.637224	0.879976
Interleukin-10 receptor subunit alpha levels	Eczema	0.281492	0.151554	0.0632581	0.687932
Interleukin-10 receptor subunit beta levels	Eczema	-0.0304849	0.12011	0.799643	0.927586
Interleukin-12 subunit beta levels	Eczema	-0.144302	0.115911	0.213156	0.713253
Interleukin-15 receptor subunit alpha levels	Eczema	0.391607	0.230602	0.0894714	0.707638
Interleukin-17A levels	Eczema	0.188762	0.115928	0.103469	0.750149
Interleukin-17C levels	Eczema	-0.0947533	0.112791	0.400863	0.830359
Interleukin-18 levels	Eczema	0.194207	0.132931	0.144025	0.783135
interleukin-18 receptor 1 levels	Eczema	0.173153	0.214381	0.419271	0.792969
Interleukin-1-alpha levels	Eczema	0.369728	0.207269	0.074455	0.647758
Interleukin-2 levels	Eczema	0.197501	0.145824	0.175615	0.694476
Interleukin-20 levels	Eczema	0.252206	0.138825	0.0692604	0.669517
Interleukin-22 receptor subunit alpha-1 levels	Eczema	0.182514	0.176942	0.30231	0.821906
Interleukin-24 levels	Eczema	1.28654	0.361095	0.000366789	0.0319106
Interleukin-2 receptor subunit beta levels	Eczema	0.235116	0.154554	0.128195	0.796638
Interleukin-4 levels	Eczema	-0.0225752	0.136745	0.868873	0.944899
Interleukin-6 levels	Eczema	0.531889	0.212576	0.0123455	0.35802
Interleukin-7 levels	Eczema	-0.148801	0.136242	0.274753	0.824259
Interleukin-8 levels	Eczema	0.202413	0.236149	0.391365	0.873045
Latency-associated peptide transforming growth factor beta 1 levels	Eczema	0.19093	0.183097	0.29705	0.861446
Leukemia inhibitory factor levels	Eczema	0.280825	0.233757	0.229613	0.739863
Leukemia inhibitory factor receptor levels	Eczema	-0.039216	0.172026	0.819673	0.926124
Monocyte chemoattractant protein-1 levels	Eczema	0.0399548	0.128595	0.756027	0.926399
Monocyte chemoattractant protein 2 levels	Eczema	-0.0517068	0.155674	0.739778	0.919439
Monocyte chemoattractant protein-3 levels	Eczema	0.240901	0.123044	0.0502487	0.874327
Monocyte chemoattractant protein-4 levels	Eczema	0.0772804	0.0956015	0.418884	0.809842
Macrophage inflammatory protein 1a levels	Eczema	0.017504	0.126011	0.889523	0.943762
Matrix metalloproteinase-1 levels	Eczema	0.0810854	0.137064	0.554127	0.845774
Matrix metalloproteinase-10 levels	Eczema	0.063995	0.175762	0.715783	0.915782
Neurturin levels	Eczema	0.352313	0.264994	0.183678	0.694782
Neurotrophin-3 levels	Eczema	-0.00242914	0.137866	0.985942	0.985942
Osteoprotegerin levels	Eczema	0.00357796	0.137367	0.97922	0.990606
Oncostatin-M levels	Eczema	0.190106	0.137265	0.166067	0.802657
Programmed cell death 1 ligand 1 levels	Eczema	0.0830598	0.132338	0.530243	0.870399
Stem cell factor levels	Eczema	-0.0897526	0.0966298	0.352977	0.877401
SIR2-like protein 2 levels	Eczema	-0.0453337	0.20149	0.821986	0.91683
Signaling lymphocytic activation molecule levels	Eczema	0.182747	0.0949249	0.0542079	0.786014
Sulfotransferase 1A1 levels	Eczema	0.287456	0.247248	0.244981	0.761192
STAM binding protein levels	Eczema	-0.108342	0.206543	0.599896	0.869849
Transforming growth factor-alpha levels	Eczema	0.11286	0.130792	0.388192	0.888755
Tumor necrosis factor levels	Eczema	-0.147625	0.498442	0.767098	0.92691
TNF-beta levels	Eczema	-0.108864	0.270176	0.686995	0.892068
Tumor necrosis factor receptor superfamily member 9 levels	Eczema	-0.0421076	0.0979342	0.667226	0.879526
Tumor necrosis factor ligand superfamily member 14 levels	Eczema	0.12805	0.192006	0.504831	0.861183
TNF-related apoptosis-inducing ligand levels	Eczema	-0.0771128	0.108773	0.478364	0.84934
TNF-related activation-induced cytokine levels	Eczema	0.0781472	0.0896246	0.383242	0.901136
Thymic stromal lymphopoietin levels	Eczema	-0.0378074	0.151324	0.802708	0.91889
Tumor necrosis factor ligand superfamily member 12 levels	Eczema	-0.077547	0.129058	0.547927	0.866721
Urokinase-type plasminogen activator levels	Eczema	-0.101149	0.119223	0.396212	0.86176
Vascular endothelial growth factor A levels	Eczema	0.297974	0.217109	0.16992	0.739154
class Actinobacteria	Psoriasis vulgaris	-0.0517711	0.125002	0.678756	0.974809
class Alphaproteobacteria	psoriasis_vulgaris	-0.135092	0.2434	0.578881	0.953037
class Bacilli	psoriasis_vulgaris	0.434671	0.271341	0.109171	1
class Bacteroidia	psoriasis_vulgaris	0.0569003	0.289037	0.843936	0.990707
class Betaproteobacteria	psoriasis_vulgaris	0.751032	0.522719	0.150781	0.925245
class Clostridia	psoriasis_vulgaris	-0.247605	0.249873	0.321724	0.835244
class Deltaproteobacteria	psoriasis_vulgaris	-0.186771	0.221722	0.399584	0.870062
class Erysipelotrichia	psoriasis_vulgaris	-0.679148	0.6086	0.264457	0.830272
class Gammaproteobacteria	psoriasis_vulgaris	0.112311	0.152031	0.460064	0.900125
class Methanobacteria	psoriasis_vulgaris	-0.229868	0.489324	0.638522	0.979551
class Mollicutes	psoriasis_vulgaris	-0.770789	0.409448	0.059767	1
class Negativicutes	psoriasis_vulgaris	0.724446	0.570007	0.203749	0.833517
class Verrucomicrobiae	psoriasis_vulgaris	0.0337884	0.190042	0.858884	0.958259
family Acidaminococcaceae	psoriasis_vulgaris	0.411444	0.365164	0.259853	0.835241
family Alcaligenaceae	psoriasis_vulgaris	0.837484	0.453402	0.064731	1
family Bacteroidaceae	psoriasis_vulgaris	0.394239	0.282957	0.163534	0.883082
family Bifidobacteriaceae	psoriasis_vulgaris	-0.127569	0.124797	0.306683	0.862546
family Christensenellaceae	psoriasis_vulgaris	-0.289451	0.208822	0.165712	0.828562
family Clostridiaceae1	psoriasis_vulgaris	-0.226223	0.159469	0.156016	0.877588
family Desulfovibrionaceae	psoriasis_vulgaris	-0.181487	0.228688	0.42743	0.887738
family Enterobacteriaceae	psoriasis_vulgaris	-0.0808239	0.249752	0.746229	0.968662
family Erysipelotrichaceae	psoriasis_vulgaris	-0.679148	0.6086	0.264457	0.811402
family FamilyXIII	psoriasis_vulgaris	-1.33431	1.73497	0.441851	0.890297
family Lachnospiraceae	psoriasis_vulgaris	-0.0303984	0.2423	0.900161	0.964458
family Methanobacteriaceae	psoriasis_vulgaris	-0.230305	0.490347	0.638585	0.957877
family Peptostreptococcaceae	psoriasis_vulgaris	0.0817738	0.140392	0.560251	0.957391
family Porphyromonadaceae	psoriasis_vulgaris	0.0879536	0.167109	0.598662	0.962135
family Prevotellaceae	psoriasis_vulgaris	0.00551294	0.313038	0.985949	0.993307
family Rhodospirillaceae	psoriasis_vulgaris	-0.25357	0.299291	0.396864	0.878305
family Ruminococcaceae	psoriasis_vulgaris	-0.262011	0.276048	0.342544	0.825775
family Streptococcaceae	psoriasis_vulgaris	0.244427	0.204945	0.233008	0.806565
family Veillonellaceae	psoriasis_vulgaris	0.127606	0.239276	0.593825	0.96586
family Verrucomicrobiaceae	psoriasis_vulgaris	0.0335905	0.19007	0.859723	0.943599
genus Clostridiuminnocuumgroup	psoriasis_vulgaris	0.201662	0.350843	0.565431	0.954165
genus Eubacteriumbrachygroup	psoriasis_vulgaris	-1.9498	1.01307	0.054273	1
genus Eubacteriumcoprostanoligenesgroup	psoriasis_vulgaris	0.0708153	0.296973	0.811527	0.995965
genus Eubacteriumeligensgroup	psoriasis_vulgaris	0.400269	0.255437	0.117115	1
genus Eubacteriumhalliigroup	psoriasis_vulgaris	-0.46025	0.296634	0.120764	1
genus Eubacteriumoxidoreducensgroup	psoriasis_vulgaris	0.623921	0.427946	0.144856	0.931217
genus Eubacteriumrectalegroup	psoriasis_vulgaris	-0.465847	0.585542	0.426274	0.899172
genus Eubacteriumruminantiumgroup	psoriasis_vulgaris	0.0152574	0.220064	0.944725	0.966196
genus Eubacteriumxylanophilumgroup	psoriasis_vulgaris	0.236865	0.18919	0.210571	0.812204
genus Ruminococcusgauvreauiigroup	psoriasis_vulgaris	0.377494	0.323019	0.242547	0.818598
genus Actinomyces	psoriasis_vulgaris	0.0723435	0.51241	0.887725	0.958743
genus Adlercreutzia	psoriasis_vulgaris	0.133647	0.408781	0.743712	0.984325
genus Akkermansia	psoriasis_vulgaris	0.0327731	0.18861	0.862053	0.938525
genus Alistipes	psoriasis_vulgaris	-0.507102	0.717455	0.479687	0.875104
genus Allisonella	psoriasis_vulgaris	0.46633	0.591423	0.430411	0.880387
genus Anaerofilum	psoriasis_vulgaris	-0.178179	0.442911	0.687469	0.947024
genus Anaerostipes	psoriasis_vulgaris	-0.013495	0.176361	0.939006	0.975122
genus Anaerotruncus	psoriasis_vulgaris	-0.0455814	0.246343	0.853204	0.96792
genus Bacteroides	psoriasis_vulgaris	0.394239	0.282957	0.163534	0.849117
genus Barnesiella	psoriasis_vulgaris	0.0710294	0.199376	0.721647	0.964578
genus Bifidobacterium	psoriasis_vulgaris	-0.132155	0.132739	0.319444	0.845588
genus Bilophila	psoriasis_vulgaris	0.04946	0.276401	0.857983	0.965231
genus Blautia	psoriasis_vulgaris	0.103848	0.173766	0.550086	0.952072
genus Butyricicoccus	psoriasis_vulgaris	0.391775	0.886331	0.658476	0.955852
genus Butyricimonas	psoriasis_vulgaris	0.404465	0.295046	0.17042	0.793334
genus Catenibacterium	psoriasis_vulgaris	-0.400268	1.56717	0.798407	0.998009
genus ChristensenellaceaeR.7group	psoriasis_vulgaris	-0.275782	0.187508	0.141352	0.954128
genus Clostridiumsensustricto1	psoriasis_vulgaris	-0.197293	0.170204	0.246393	0.811295
genus Collinsella	psoriasis_vulgaris	-0.214393	1.10908	0.846719	0.968703
genus Coprobacter	psoriasis_vulgaris	-0.0438064	0.226237	0.846465	0.976691
genus Coprococcus1	psoriasis_vulgaris	-0.155319	0.381954	0.684271	0.962256
genus Coprococcus2	psoriasis_vulgaris	-0.15558	0.240565	0.517807	0.919789
genus Coprococcus3	psoriasis_vulgaris	0.322366	0.341707	0.345477	0.818236
genus Eggerthella	psoriasis_vulgaris	0.474589	0.213773	0.0264145	1
genus Eisenbergiella	psoriasis_vulgaris	-0.160887	0.414212	0.697707	0.941905
genus Enterorhabdus	psoriasis_vulgaris	0.400251	0.313963	0.202367	0.853735
genus Erysipelatoclostridium	psoriasis_vulgaris	0.372383	0.190475	0.0505807	1
genus ErysipelotrichaceaeUCG003	psoriasis_vulgaris	-0.308722	0.200698	0.123989	0.880972
genus Escherichia.Shigella	psoriasis_vulgaris	-0.253973	0.351269	0.469671	0.880633
genus Faecalibacterium	psoriasis_vulgaris	-0.222769	0.243111	0.359495	0.836756
genus FamilyXIIIAD3011group	psoriasis_vulgaris	-0.204676	0.234303	0.382362	0.860315
genus Flavonifractor	psoriasis_vulgaris	0.0389145	0.192529	0.839821	0.994525
genus Fusicatenibacter	psoriasis_vulgaris	-0.258731	0.662366	0.69608	0.9492
genus Haemophilus	psoriasis_vulgaris	0.714389	0.996337	0.473364	0.8754
genus Holdemania	psoriasis_vulgaris	-0.0800711	0.358707	0.823363	0.992446
genus Intestinibacter	psoriasis_vulgaris	0.331777	0.2143	0.121576	0.911823
genus Lachnoclostridium	psoriasis_vulgaris	0.211397	0.169911	0.213439	0.778765
genus Lachnospira	psoriasis_vulgaris	2.27846	1.46914	0.120929	0.960319
genus LachnospiraceaeFCS020group	psoriasis_vulgaris	-0.0388372	0.150335	0.796146	1
genus LachnospiraceaeNC2004group	psoriasis_vulgaris	-0.350191	0.269628	0.194014	0.844902
genus LachnospiraceaeUCG004	psoriasis_vulgaris	0.0992909	0.197247	0.614695	0.964929
genus LachnospiraceaeUCG010	psoriasis_vulgaris	-0.124836	0.309321	0.68652	0.955467
genus Marvinbryantia	psoriasis_vulgaris	1.07622	1.10106	0.328351	0.820877
genus Methanobrevibacter	psoriasis_vulgaris	-0.198092	0.326962	0.544611	0.954838
genus Olsenella	psoriasis_vulgaris	2.91041	1.62497	0.0732849	1
genus Oscillospira	psoriasis_vulgaris	-0.0305666	0.285834	0.914838	0.964868
genus Parabacteroides	psoriasis_vulgaris	0.269388	0.248377	0.278102	0.816169
genus Parasutterella	psoriasis_vulgaris	0.104982	0.511023	0.837232	1
genus Peptococcus	psoriasis_vulgaris	-0.697746	0.6779	0.30335	0.871325
genus Prevotella7	psoriasis_vulgaris	0.0055191	0.45941	0.990415	0.990415
genus RikenellaceaeRC9gutgroup	psoriasis_vulgaris	-0.456586	0.280404	0.103458	1
genus Romboutsia	psoriasis_vulgaris	-0.0189019	0.30009	0.949776	0.964059
genus Roseburia	psoriasis_vulgaris	-0.207422	0.229214	0.365505	0.836326
genus Ruminiclostridium9	psoriasis_vulgaris	-0.061793	0.132775	0.641647	0.951893
genus RuminococcaceaeNK4A214group	psoriasis_vulgaris	-0.567648	0.336857	0.0919634	1
genus RuminococcaceaeUCG002	psoriasis_vulgaris	-0.114421	0.280604	0.683444	0.97121
genus RuminococcaceaeUCG003	psoriasis_vulgaris	0.0183812	0.262727	0.944223	0.973054
genus RuminococcaceaeUCG004	psoriasis_vulgaris	-0.151914	0.322856	0.637975	0.989962
genus RuminococcaceaeUCG005	psoriasis_vulgaris	-0.070301	0.217182	0.746168	0.977988
genus RuminococcaceaeUCG010	psoriasis_vulgaris	0.0293833	0.297203	0.921244	0.964093
genus RuminococcaceaeUCG011	psoriasis_vulgaris	2.19316	1.53208	0.152289	0.893871
genus RuminococcaceaeUCG014	psoriasis_vulgaris	0.0590246	0.24287	0.807982	1
genus Ruminococcus2	psoriasis_vulgaris	-0.25564	0.213818	0.231852	0.823685
genus Sellimonas	psoriasis_vulgaris	-0.0924789	0.206317	0.653982	0.959648
genus Slackia	psoriasis_vulgaris	0.249408	0.189973	0.189229	0.851532
genus Streptococcus	psoriasis_vulgaris	0.206006	0.272095	0.448983	0.891363
genus Subdoligranulum	psoriasis_vulgaris	-0.351596	0.282438	0.213184	0.799438
genus Sutterella	psoriasis_vulgaris	0.137507	0.242811	0.571182	0.95197
genus Terrisporobacter	psoriasis_vulgaris	0.152017	0.232679	0.513541	0.924374
genus Turicibacter	psoriasis_vulgaris	-0.107282	0.361399	0.766579	0.976303
genus Veillonella	psoriasis_vulgaris	-0.0961205	0.856934	0.91069	0.968057
order Bacteroidales	psoriasis_vulgaris	0.0568824	0.289115	0.844026	0.982271
order Bifidobacteriales	psoriasis_vulgaris	-0.127569	0.124797	0.306683	0.844943
order Burkholderiales	psoriasis_vulgaris	0.951974	0.605714	0.11603	1
order Clostridiales	psoriasis_vulgaris	-0.249622	0.2456	0.309451	0.835518
order Desulfovibrionales	psoriasis_vulgaris	-0.181714	0.224564	0.418407	0.896586
order Enterobacteriales	psoriasis_vulgaris	-0.0808239	0.249752	0.746229	0.959437
order Erysipelotrichales	psoriasis_vulgaris	-0.679148	0.6086	0.264457	0.793371
order Lactobacillales	psoriasis_vulgaris	0.33791	0.246297	0.170075	0.820003
order Methanobacteriales	psoriasis_vulgaris	-0.229868	0.489324	0.638522	0.968545
order MollicutesRF9	psoriasis_vulgaris	-0.80443	0.513645	0.11732	1
order Rhodospirillales	psoriasis_vulgaris	-0.234115	0.317114	0.460352	0.887821
order Selenomonadales	psoriasis_vulgaris	0.724446	0.570007	0.203749	0.809002
order Verrucomicrobiales	psoriasis_vulgaris	0.0337884	0.190042	0.858884	0.950405
phylum Actinobacteria	psoriasis_vulgaris	-0.301937	0.179657	0.0928336	1
phylum Bacteroidetes	psoriasis_vulgaris	0.0702525	0.295362	0.811996	0.987562
phylum Cyanobacteria	psoriasis_vulgaris	-0.736725	0.755357	0.329395	0.808516
phylum Euryarchaeota	psoriasis_vulgaris	-0.16745	0.32102	0.601937	0.956017
phylum Firmicutes	psoriasis_vulgaris	-0.433168	0.439368	0.324187	0.825759
phylum Proteobacteria	psoriasis_vulgaris	0.397417	0.202294	0.0494658	1
phylum Tenericutes	psoriasis_vulgaris	-0.770789	0.409448	0.059767	1
phylum Verrucomicrobia	psoriasis_vulgaris	-0.141462	0.194956	0.468076	0.890004
Eukaryotic translation initiation factor 4E-binding protein 1 levels	Psoriasis_vulgaris	-0.0320146	0.161802	0.843153	1
Adenosine Deaminase levels	Psoriasis_vulgaris	0.406284	0.61988	0.512196	0.948107
Artemin levels	Psoriasis_vulgaris	-0.337859	0.434958	0.437299	0.951125
Axin-1 levels	Psoriasis_vulgaris	-0.190334	0.205819	0.355089	0.996539
beta-nerve growth factor levels	Psoriasis_vulgaris	-0.0224474	0.153066	0.883407	1
Caspase 8 levels	Psoriasis_vulgaris	0.213253	0.207591	0.304291	0.912874
Eotaxin levels	Psoriasis_vulgaris	0.00115145	0.12719	0.992777	0.992777
C-C motif chemokine 19 levels	Psoriasis_vulgaris	0.28457	0.1104	0.00994799	0.865475
C-C motif chemokine 20 levels	Psoriasis_vulgaris	0.0167402	0.149328	0.910742	0.990432
C-C motif chemokine 23 levels	Psoriasis_vulgaris	-0.0906485	0.24756	0.71424	1
C-C motif chemokine 25 levels	Psoriasis_vulgaris	-0.0246046	0.15252	0.871841	1
C-C motif chemokine 28 levels	Psoriasis_vulgaris	-0.142625	0.13075	0.275352	0.887244
C-C motif chemokine 4 levels	Psoriasis_vulgaris	0.112297	0.123323	0.362508	0.98557
Natural killer cell receptor 2B4 levels	Psoriasis_vulgaris	-0.0268171	0.135373	0.842969	1
CD40L receptor levels	Psoriasis_vulgaris	-0.157316	0.217988	0.470496	0.930298
T-cell surface glycoprotein CD5 levels	Psoriasis_vulgaris	0.187585	0.121246	0.121828	0.757077
T-cell surface glycoprotein CD6 isoform levels	Psoriasis_vulgaris	0.0919601	0.130223	0.480079	0.928153
CUB domain-containing protein 1 levels	Psoriasis_vulgaris	0.0223904	0.148322	0.880009	1
Macrophage colony-stimulating factor 1 levels	Psoriasis_vulgaris	-0.00791853	0.16269	0.96118	1
Cystatin D levels	Psoriasis_vulgaris	-0.149136	0.121901	0.221171	0.836602
Fractalkine levels	Psoriasis_vulgaris	0.043777	0.183028	0.810965	1
C-X-C motif chemokine 1 levels	Psoriasis_vulgaris	0.129208	0.425443	0.761355	1
C-X-C motif chemokine 10 levels	Psoriasis_vulgaris	0.13607	0.119989	0.256786	0.859247
C-X-C motif chemokine 11 levels	Psoriasis_vulgaris	0.164317	0.133861	0.219625	0.868517
C-X-C motif chemokine 5 levels	Psoriasis_vulgaris	0.141246	0.183458	0.441354	0.936532
C-X-C motif chemokine 6 levels	Psoriasis_vulgaris	0.229026	0.152228	0.132454	0.768231
C-X-C motif chemokine 9 levels	Psoriasis_vulgaris	0.306285	0.122697	0.0125509	0.545965
Delta and Notch-like epidermal growth factor-related receptor levels	Psoriasis_vulgaris	-0.274745	0.152032	0.0707383	0.769279
Protein S100-A12 levels	Psoriasis_vulgaris	0.301838	0.16497	0.0673013	0.836459
Fibroblast growth factor 19 levels	Psoriasis_vulgaris	0.0141216	0.113668	0.901129	1
Fibroblast growth factor 21 levels	Psoriasis_vulgaris	0.181375	0.135362	0.180269	0.825443
Fibroblast growth factor 23 levels	Psoriasis_vulgaris	0.033022	0.142686	0.81698	1
Fibroblast growth factor 5 levels	Psoriasis_vulgaris	-0.164004	0.208381	0.431258	0.962037
Fms-related tyrosine kinase 3 ligand levels	Psoriasis_vulgaris	0.0472686	0.109808	0.666858	1
Glial cell line-derived neurotrophic factor levels	Psoriasis_vulgaris	-0.2496	0.150797	0.0978816	0.85157
Hepatocyte growth factor levels	Psoriasis_vulgaris	-0.043694	0.185624	0.813906	1
Interferon gamma levels	Psoriasis_vulgaris	-0.186639	0.321159	0.561144	0.976391
Interleukin-10 levels	Psoriasis_vulgaris	0.0894788	0.160415	0.576985	0.984268
Interleukin-10 receptor subunit alpha levels	Psoriasis_vulgaris	-0.265718	0.140177	0.058015	1
Interleukin-10 receptor subunit beta levels	Psoriasis_vulgaris	-0.0314841	0.154377	0.838398	1
Interleukin-12 subunit beta levels	Psoriasis_vulgaris	0.0252569	0.149489	0.865832	1
Interleukin-15 receptor subunit alpha levels	Psoriasis_vulgaris	-0.219201	0.257325	0.394299	0.980114
Interleukin-17A levels	Psoriasis_vulgaris	0.0946599	0.153197	0.536643	0.952816
Interleukin-17C levels	Psoriasis_vulgaris	-0.246398	0.150866	0.102422	0.810067
Interleukin-18 levels	Psoriasis_vulgaris	0.233369	0.16344	0.153332	0.784699
interleukin-18 receptor 1 levels	Psoriasis_vulgaris	0.281142	0.227584	0.216706	0.942671
Interleukin-1-alpha levels	Psoriasis_vulgaris	0.288123	0.240116	0.230165	0.83435
Interleukin-2 levels	Psoriasis_vulgaris	0.00995842	0.190379	0.958283	1
Interleukin-20 levels	Psoriasis_vulgaris	-0.167754	0.179443	0.34986	1
Interleukin-22 receptor subunit alpha-1 levels	Psoriasis_vulgaris	0.249944	0.212709	0.239974	0.835111
Interleukin-24 levels	Psoriasis_vulgaris	0.517609	0.486131	0.286988	0.891714
Interleukin-2 receptor subunit beta levels	Psoriasis_vulgaris	-0.0439424	0.185708	0.812951	1
Interleukin-4 levels	Psoriasis_vulgaris	-0.0136328	0.19817	0.945154	1
Interleukin-6 levels	Psoriasis_vulgaris	0.0102866	0.263727	0.968887	1
Interleukin-7 levels	Psoriasis_vulgaris	0.0617029	0.17337	0.721914	1
Interleukin-8 levels	Psoriasis_vulgaris	0.206213	0.273664	0.451134	0.934491
Latency-associated peptide transforming growth factor beta 1 levels	Psoriasis_vulgaris	0.0383655	0.212489	0.856718	1
Leukemia inhibitory factor levels	Psoriasis_vulgaris	0.248306	0.333282	0.456251	0.923113
Leukemia inhibitory factor receptor levels	Psoriasis_vulgaris	0.183071	0.207312	0.377198	0.965183
Monocyte chemoattractant protein-1 levels	Psoriasis_vulgaris	0.109602	0.159501	0.491984	0.930491
Monocyte chemoattractant protein 2 levels	Psoriasis_vulgaris	-0.146471	0.177595	0.409515	0.962913
Monocyte chemoattractant protein-3 levels	Psoriasis_vulgaris	0.243192	0.155662	0.118215	0.85706
Monocyte chemoattractant protein-4 levels	Psoriasis_vulgaris	0.0696947	0.126532	0.581766	0.973339
Macrophage inflammatory protein 1a levels	Psoriasis_vulgaris	0.0762335	0.156837	0.626919	1
Matrix metalloproteinase-1 levels	Psoriasis_vulgaris	-0.0240085	0.190189	0.899546	1
Matrix metalloproteinase-10 levels	Psoriasis_vulgaris	0.0327919	0.223925	0.883573	1
Neurturin levels	Psoriasis_vulgaris	-0.126215	0.322092	0.695161	1
Neurotrophin-3 levels	Psoriasis_vulgaris	-0.302403	0.160968	0.0602923	0.874238
Osteoprotegerin levels	Psoriasis_vulgaris	-0.0788261	0.147188	0.592272	0.972221
Oncostatin-M levels	Psoriasis_vulgaris	0.0349037	0.140105	0.803264	1
Programmed cell death 1 ligand 1 levels	Psoriasis_vulgaris	-0.19118	0.155441	0.218727	0.906154
Stem cell factor levels	Psoriasis_vulgaris	-0.0310479	0.105211	0.767916	1
SIR2-like protein 2 levels	Psoriasis_vulgaris	-0.114475	0.253395	0.651438	1
Signaling lymphocytic activation molecule levels	Psoriasis_vulgaris	0.10571	0.1194	0.375974	0.991203
Sulfotransferase 1A1 levels	Psoriasis_vulgaris	0.39178	0.28506	0.169325	0.818404
STAM binding protein levels	Psoriasis_vulgaris	-0.216138	0.257706	0.401639	0.970628
Transforming growth factor-alpha levels	Psoriasis_vulgaris	-0.00263262	0.141883	0.985196	1
Tumor necrosis factor levels	Psoriasis_vulgaris	-1.06528	0.499281	0.0328728	0.95331
TNF-beta levels	Psoriasis_vulgaris	0.146689	0.317942	0.644534	1
Tumor necrosis factor receptor superfamily member 9 levels	Psoriasis_vulgaris	-0.00222669	0.129767	0.98631	0.997778
Tumor necrosis factor ligand superfamily member 14 levels	Psoriasis_vulgaris	-0.0220732	0.195145	0.909942	1
TNF-related apoptosis-inducing ligand levels	Psoriasis_vulgaris	0.069452	0.11028	0.528839	0.95852
TNF-related activation-induced cytokine levels	Psoriasis_vulgaris	0.199578	0.116173	0.085809	0.829487
Thymic stromal lymphopoietin levels	Psoriasis_vulgaris	-0.247334	0.159836	0.12176	0.814854
Tumor necrosis factor ligand superfamily member 12 levels	Psoriasis_vulgaris	-0.276963	0.135409	0.0408171	0.887772
Urokinase-type plasminogen activator levels	Psoriasis_vulgaris	-0.180179	0.123318	0.143989	0.782938
Vascular endothelial growth factor A levels	Psoriasis_vulgaris	0.215542	0.264868	0.415776	0.951908
class Actinobacteria	Psoriatic_arthritis	-0.0910818	0.297023	0.759111	1
class Alphaproteobacteria	Psoriatic_arthritis	0.27661	0.531581	0.602818	1
class Bacilli	Psoriatic_arthritis	0.759538	0.653459	0.245099	0.945383
class Bacteroidia	Psoriatic_arthritis	0.0505819	0.656583	0.938593	0.997717
class Betaproteobacteria	Psoriatic_arthritis	1.84855	1.06426	0.0823985	1
class Clostridia	Psoriatic_arthritis	0.123916	0.54996	0.821731	0.964641
class Deltaproteobacteria	Psoriatic_arthritis	-0.798448	0.597104	0.181157	1
class Erysipelotrichia	Psoriatic_arthritis	2.1352	1.48178	0.149592	1
class Gammaproteobacteria	Psoriatic_arthritis	-0.529589	0.358888	0.140041	1
class Methanobacteria	Psoriatic_arthritis	-0.434878	1.12669	0.699513	1
class Mollicutes	Psoriatic_arthritis	-0.368837	0.947915	0.697199	1
class Negativicutes	Psoriatic_arthritis	-0.357688	1.30363	0.783793	1
class Verrucomicrobiae	Psoriatic_arthritis	0.153353	0.46356	0.740784	1
family Acidaminococcaceae	Psoriatic_arthritis	-0.622421	0.908097	0.493084	1
family Alcaligenaceae	Psoriatic_arthritis	1.64167	0.980976	0.0942287	1
family Bacteroidaceae	Psoriatic_arthritis	0.554344	0.62945	0.37849	1
family Bifidobacteriaceae	Psoriatic_arthritis	-0.0227727	0.303911	0.940269	0.99169
family Christensenellaceae	Psoriatic_arthritis	-0.982683	0.441251	0.0259446	1
family Clostridiaceae1	Psoriatic_arthritis	-0.412915	0.375455	0.271432	0.964299
family Desulfovibrionaceae	Psoriatic_arthritis	-0.81655	0.617635	0.186148	0.930741
family Enterobacteriaceae	Psoriatic_arthritis	-1.03457	0.603249	0.0863445	1
family Erysipelotrichaceae	Psoriatic_arthritis	2.1352	1.48178	0.149592	1
family FamilyXIII	Psoriatic_arthritis	7.37383	4.03266	0.0674705	1
family Lachnospiraceae	Psoriatic_arthritis	0.223927	0.577334	0.698116	1
family Methanobacteriaceae	Psoriatic_arthritis	-0.435708	1.12897	0.699547	1
family Peptostreptococcaceae	Psoriatic_arthritis	0.0268185	0.32719	0.934674	1
family Porphyromonadaceae	Psoriatic_arthritis	-0.536072	0.428704	0.211136	0.919464
family Prevotellaceae	Psoriatic_arthritis	-1.21	0.786086	0.123739	1
family Rhodospirillaceae	Psoriatic_arthritis	-0.526422	0.644858	0.414307	1
family Ruminococcaceae	Psoriatic_arthritis	0.141631	0.626181	0.82106	0.972308
family Streptococcaceae	Psoriatic_arthritis	0.717683	0.541999	0.185456	0.962945
family Veillonellaceae	Psoriatic_arthritis	0.255003	0.641342	0.690918	1
family Verrucomicrobiaceae	Psoriatic_arthritis	0.153355	0.463645	0.740826	1
genus Clostridiuminnocuumgroup	Psoriatic_arthritis	1.38214	0.812317	0.0888534	1
genus Eubacteriumbrachygroup	Psoriatic_arthritis	-3.16102	2.80795	0.260276	0.949654
genus Eubacteriumcoprostanoligenesgroup	Psoriatic_arthritis	0.19842	0.661022	0.764047	1
genus Eubacteriumeligensgroup	Psoriatic_arthritis	0.0520705	0.653076	0.936451	1
genus Eubacteriumhalliigroup	Psoriatic_arthritis	-0.160069	0.659405	0.8082	0.991882
genus Eubacteriumoxidoreducensgroup	Psoriatic_arthritis	0.159495	0.979879	0.8707	0.979537
genus Eubacteriumrectalegroup	Psoriatic_arthritis	-0.572821	1.50549	0.703584	1
genus Eubacteriumruminantiumgroup	Psoriatic_arthritis	0.460037	0.526175	0.381952	1
genus Eubacteriumxylanophilumgroup	Psoriatic_arthritis	0.693151	0.466632	0.137429	1
genus Ruminococcusgauvreauiigroup	Psoriatic_arthritis	0.644088	0.770078	0.402934	1
genus Actinomyces	Psoriatic_arthritis	0.310843	1.24279	0.802496	0.993917
genus Adlercreutzia	Psoriatic_arthritis	-0.271552	1.18461	0.818687	0.978078
genus Akkermansia	Psoriatic_arthritis	0.144131	0.459794	0.753925	1
genus Alistipes	Psoriatic_arthritis	-0.0296091	1.83459	0.987123	1
genus Allisonella	Psoriatic_arthritis	0.501537	1.21135	0.678852	1
genus Anaerofilum	Psoriatic_arthritis	-0.267817	0.983319	0.785345	1
genus Anaerostipes	Psoriatic_arthritis	0.578761	0.434729	0.183085	0.988658
genus Anaerotruncus	Psoriatic_arthritis	-0.141512	0.560671	0.800734	1
genus Bacteroides	Psoriatic_arthritis	0.554344	0.62945	0.37849	1
genus Barnesiella	Psoriatic_arthritis	-0.115533	0.501341	0.817744	0.985673
genus Bifidobacterium	Psoriatic_arthritis	-0.180835	0.312315	0.562579	1
genus Bilophila	Psoriatic_arthritis	-0.217565	0.763358	0.775636	1
genus Blautia	Psoriatic_arthritis	-0.254764	0.422391	0.546411	1
genus Butyricicoccus	Psoriatic_arthritis	-1.88774	2.24298	0.399998	1
genus Butyricimonas	Psoriatic_arthritis	0.44066	0.700781	0.529472	1
genus Catenibacterium	Psoriatic_arthritis	-0.0726438	4.14302	0.986011	1
genus ChristensenellaceaeR.7group	Psoriatic_arthritis	-1.02336	0.387096	0.00820101	0.553568
genus Clostridiumsensustricto1	Psoriatic_arthritis	-0.418277	0.402544	0.298766	1
genus Collinsella	Psoriatic_arthritis	-0.578249	2.65771	0.827761	0.955109
genus Coprobacter	Psoriatic_arthritis	0.539536	0.566994	0.341314	1
genus Coprococcus1	Psoriatic_arthritis	-0.524961	0.973312	0.589642	1
genus Coprococcus2	Psoriatic_arthritis	-0.857116	0.589644	0.146053	1
genus Coprococcus3	Psoriatic_arthritis	0.325216	0.919017	0.723434	1
genus Eggerthella	Psoriatic_arthritis	-0.425709	0.570597	0.455621	0.992078
genus Eisenbergiella	Psoriatic_arthritis	-0.548044	0.947693	0.563066	1
genus Enterorhabdus	Psoriatic_arthritis	-0.0110778	0.756089	0.98831	0.995686
genus Erysipelatoclostridium	Psoriatic_arthritis	0.295662	0.455397	0.516183	1
genus ErysipelotrichaceaeUCG003	Psoriatic_arthritis	0.643567	0.546417	0.238879	0.948489
genus Escherichia.Shigella	Psoriatic_arthritis	-1.84704	0.868391	0.0334231	1
genus Faecalibacterium	Psoriatic_arthritis	-0.638693	0.593945	0.282222	0.976923
genus FamilyXIIIAD3011group	Psoriatic_arthritis	0.052022	0.591984	0.929974	1
genus Flavonifractor	Psoriatic_arthritis	0.368675	0.421012	0.3812	1
genus Fusicatenibacter	Psoriatic_arthritis	1.333	1.69362	0.431241	1
genus Haemophilus	Psoriatic_arthritis	-0.327974	2.23336	0.883248	0.985442
genus Holdemania	Psoriatic_arthritis	0.294596	0.847035	0.727993	1
genus Intestinibacter	Psoriatic_arthritis	-0.249387	0.500737	0.618456	1
genus Lachnoclostridium	Psoriatic_arthritis	-0.149957	0.433197	0.72922	1
genus Lachnospira	Psoriatic_arthritis	2.4379	3.99155	0.541355	1
genus LachnospiraceaeFCS020group	Psoriatic_arthritis	-0.280784	0.335849	0.403131	1
genus LachnospiraceaeNC2004group	Psoriatic_arthritis	-0.615831	0.740752	0.40577	1
genus LachnospiraceaeUCG004	Psoriatic_arthritis	0.220368	0.475318	0.642919	1
genus LachnospiraceaeUCG010	Psoriatic_arthritis	-0.746422	0.728019	0.305232	1
genus Marvinbryantia	Psoriatic_arthritis	-4.33259	2.77352	0.118259	1
genus Methanobrevibacter	Psoriatic_arthritis	-0.384656	0.748232	0.607192	1
genus Olsenella	Psoriatic_arthritis	2.80899	3.87577	0.468601	1
genus Oscillospira	Psoriatic_arthritis	0.269053	0.718813	0.70818	1
genus Parabacteroides	Psoriatic_arthritis	-0.814143	0.646394	0.207845	0.967553
genus Parasutterella	Psoriatic_arthritis	1.92708	1.12896	0.0878312	1
genus Peptococcus	Psoriatic_arthritis	-0.0759509	1.65282	0.963348	1
genus Prevotella7	Psoriatic_arthritis	-0.724523	1.0259	0.480042	1
genus RikenellaceaeRC9gutgroup	Psoriatic_arthritis	-0.787001	0.678293	0.245941	0.922277
genus Romboutsia	Psoriatic_arthritis	0.214744	0.693007	0.756658	1
genus Roseburia	Psoriatic_arthritis	-0.513961	0.562612	0.360965	1
genus Ruminiclostridium9	Psoriatic_arthritis	-0.9793	0.318261	0.0020907	0.282245
genus RuminococcaceaeNK4A214group	Psoriatic_arthritis	0.0320618	0.763882	0.966521	0.996033
genus RuminococcaceaeUCG002	Psoriatic_arthritis	-0.359411	0.680721	0.597509	1
genus RuminococcaceaeUCG003	Psoriatic_arthritis	0.334541	0.678887	0.622169	1
genus RuminococcaceaeUCG004	Psoriatic_arthritis	0.209915	0.783738	0.788824	0.995245
genus RuminococcaceaeUCG005	Psoriatic_arthritis	-0.367079	0.483355	0.44759	1
genus RuminococcaceaeUCG010	Psoriatic_arthritis	0.524267	0.669281	0.433434	1
genus RuminococcaceaeUCG011	Psoriatic_arthritis	4.99099	3.96695	0.20834	0.937532
genus RuminococcaceaeUCG014	Psoriatic_arthritis	0.616473	0.665595	0.354343	1
genus Ruminococcus2	Psoriatic_arthritis	-0.211147	0.50129	0.673603	1
genus Sellimonas	Psoriatic_arthritis	-0.474928	0.478189	0.320621	1
genus Slackia	Psoriatic_arthritis	0.124919	0.454757	0.783551	1
genus Streptococcus	Psoriatic_arthritis	0.849355	0.715579	0.235248	0.962379
genus Subdoligranulum	Psoriatic_arthritis	-0.920816	0.643274	0.152301	0.934573
genus Sutterella	Psoriatic_arthritis	0.713888	0.562692	0.204548	0.986214
genus Terrisporobacter	Psoriatic_arthritis	0.134057	0.555959	0.809456	0.984474
genus Turicibacter	Psoriatic_arthritis	0.109954	0.8141	0.892563	0.987672
genus Veillonella	Psoriatic_arthritis	-1.55896	2.05259	0.447548	1
order Bacteroidales	Psoriatic_arthritis	0.0506356	0.656746	0.938543	1
order Bifidobacteriales	Psoriatic_arthritis	-0.0227727	0.303911	0.940269	0.984002
order Burkholderiales	Psoriatic_arthritis	2.04515	1.23296	0.0971684	1
order Clostridiales	Psoriatic_arthritis	0.120192	0.540871	0.824143	0.959132
order Desulfovibrionales	Psoriatic_arthritis	-0.810663	0.603773	0.179381	1
order Enterobacteriales	Psoriatic_arthritis	-1.03457	0.603249	0.0863445	1
order Erysipelotrichales	Psoriatic_arthritis	2.1352	1.48178	0.149592	0.961666
order Lactobacillales	Psoriatic_arthritis	0.723589	0.600788	0.228435	0.963711
order Methanobacteriales	Psoriatic_arthritis	-0.434878	1.12669	0.699513	1
order MollicutesRF9	Psoriatic_arthritis	0.416592	1.29653	0.747974	1
order Rhodospirillales	Psoriatic_arthritis	-0.514832	0.684055	0.45168	0.999619
order Selenomonadales	Psoriatic_arthritis	-0.357688	1.30363	0.783793	1
order Verrucomicrobiales	Psoriatic_arthritis	0.153353	0.46356	0.740784	1
phylum Actinobacteria	Psoriatic_arthritis	-0.186188	0.385985	0.629542	1
phylum Bacteroidetes	Psoriatic_arthritis	0.121664	0.668562	0.855599	0.978864
phylum Cyanobacteria	Psoriatic_arthritis	-3.35882	2.00371	0.0936793	1
phylum Euryarchaeota	Psoriatic_arthritis	-0.127366	0.72471	0.860493	0.976189
phylum Firmicutes	Psoriatic_arthritis	0.821981	1.06215	0.439	1
phylum Proteobacteria	Psoriatic_arthritis	-0.414038	0.447641	0.355001	1
phylum Tenericutes	Psoriatic_arthritis	-0.368837	0.947915	0.697199	1
phylum Verrucomicrobia	Psoriatic_arthritis	-0.00429824	0.46727	0.992661	0.992661
Eukaryotic translation initiation factor 4E-binding protein 1 levels	Psoriatic_arthritis	-0.688425	0.411022	0.0939512	1
Adenosine Deaminase levels	Psoriatic_arthritis	-3.63721	1.6726	0.0296617	1
Artemin levels	Psoriatic_arthritis	0.646545	1.04657	0.536724	0.915587
Axin-1 levels	Psoriatic_arthritis	-1.09946	0.539027	0.0413789	1
beta-nerve growth factor levels	Psoriatic_arthritis	-0.0787494	0.390011	0.839983	1
Caspase 8 levels	Psoriatic_arthritis	-0.362487	0.594733	0.542195	0.907135
Eotaxin levels	Psoriatic_arthritis	0.445086	0.276694	0.107707	1
C-C motif chemokine 19 levels	Psoriatic_arthritis	0.0624653	0.290784	0.82991	1
C-C motif chemokine 20 levels	Psoriatic_arthritis	0.377901	0.32271	0.241589	0.875759
C-C motif chemokine 23 levels	Psoriatic_arthritis	-0.16413	0.586077	0.77944	0.982773
C-C motif chemokine 25 levels	Psoriatic_arthritis	-0.349726	0.330428	0.289872	0.720538
C-C motif chemokine 28 levels	Psoriatic_arthritis	-0.215727	0.342192	0.528415	0.938206
C-C motif chemokine 4 levels	Psoriatic_arthritis	0.0453794	0.277517	0.87011	0.983111
Natural killer cell receptor 2B4 levels	Psoriatic_arthritis	-0.251635	0.29089	0.387011	0.841748
CD40L receptor levels	Psoriatic_arthritis	-0.751529	0.52598	0.153057	0.951139
T-cell surface glycoprotein CD5 levels	Psoriatic_arthritis	0.248806	0.298032	0.403814	0.856874
T-cell surface glycoprotein CD6 isoform levels	Psoriatic_arthritis	0.135984	0.38081	0.721024	0.965063
CUB domain-containing protein 1 levels	Psoriatic_arthritis	-0.158617	0.31037	0.609309	0.946605
Macrophage colony-stimulating factor 1 levels	Psoriatic_arthritis	0.534783	0.369649	0.147972	1
Cystatin D levels	Psoriatic_arthritis	0.131406	0.304258	0.66582	0.949612
Fractalkine levels	Psoriatic_arthritis	-0.162108	0.404397	0.688521	0.950814
C-X-C motif chemokine 1 levels	Psoriatic_arthritis	-0.616933	1.04372	0.554461	0.893299
C-X-C motif chemokine 10 levels	Psoriatic_arthritis	0.0446165	0.327102	0.891506	0.957543
C-X-C motif chemokine 11 levels	Psoriatic_arthritis	-0.141969	0.315226	0.652442	0.94604
C-X-C motif chemokine 5 levels	Psoriatic_arthritis	-0.464845	0.412427	0.259702	0.836816
C-X-C motif chemokine 6 levels	Psoriatic_arthritis	-0.38775	0.337258	0.250261	0.837413
C-X-C motif chemokine 9 levels	Psoriatic_arthritis	0.241458	0.324367	0.456636	0.882829
Delta and Notch-like epidermal growth factor-related receptor levels	Psoriatic_arthritis	-0.29047	0.364023	0.424903	0.880156
Protein S100-A12 levels	Psoriatic_arthritis	0.514798	0.474548	0.278002	0.780199
Fibroblast growth factor 19 levels	Psoriatic_arthritis	-0.353536	0.322631	0.273169	0.819508
Fibroblast growth factor 21 levels	Psoriatic_arthritis	0.0206733	0.312988	0.947337	0.958352
Fibroblast growth factor 23 levels	Psoriatic_arthritis	0.0581135	0.296172	0.844442	0.979552
Fibroblast growth factor 5 levels	Psoriatic_arthritis	-0.241034	0.513647	0.638883	0.975137
Fms-related tyrosine kinase 3 ligand levels	Psoriatic_arthritis	0.281928	0.254208	0.26741	0.830881
Glial cell line-derived neurotrophic factor levels	Psoriatic_arthritis	0.217905	0.347844	0.531023	0.92398
Hepatocyte growth factor levels	Psoriatic_arthritis	-0.197669	0.434123	0.648872	0.956811
Interferon gamma levels	Psoriatic_arthritis	0.56557	0.807742	0.483811	0.895565
Interleukin-10 levels	Psoriatic_arthritis	-0.493633	0.412867	0.231844	0.916836
Interleukin-10 receptor subunit alpha levels	Psoriatic_arthritis	0.0139135	0.366226	0.969694	0.969694
Interleukin-10 receptor subunit beta levels	Psoriatic_arthritis	-0.551088	0.318949	0.0840198	1
Interleukin-12 subunit beta levels	Psoriatic_arthritis	0.429356	0.350529	0.22062	1
Interleukin-15 receptor subunit alpha levels	Psoriatic_arthritis	0.673409	0.629916	0.285049	0.774977
Interleukin-17A levels	Psoriatic_arthritis	-0.0510811	0.314102	0.870813	0.971292
Interleukin-17C levels	Psoriatic_arthritis	-0.390115	0.367366	0.28827	0.759984
Interleukin-18 levels	Psoriatic_arthritis	-0.502659	0.412915	0.223475	0.972114
interleukin-18 receptor 1 levels	Psoriatic_arthritis	0.0835858	0.480236	0.861825	0.986563
Interleukin-1-alpha levels	Psoriatic_arthritis	0.56625	0.646847	0.381357	0.850719
Interleukin-2 levels	Psoriatic_arthritis	0.14084	0.460822	0.759889	0.972211
Interleukin-20 levels	Psoriatic_arthritis	-0.679842	0.485818	0.1617	0.93786
Interleukin-22 receptor subunit alpha-1 levels	Psoriatic_arthritis	-0.212375	0.465036	0.647897	0.971846
Interleukin-24 levels	Psoriatic_arthritis	-0.253512	1.25646	0.840099	0.987684
Interleukin-2 receptor subunit beta levels	Psoriatic_arthritis	0.473318	0.499717	0.343551	0.807809
Interleukin-4 levels	Psoriatic_arthritis	0.443827	0.473401	0.348487	0.797852
Interleukin-6 levels	Psoriatic_arthritis	0.051914	0.587829	0.929626	0.974428
Interleukin-7 levels	Psoriatic_arthritis	-0.392826	0.388852	0.31239	0.754943
Interleukin-8 levels	Psoriatic_arthritis	-1.20331	0.676572	0.0753144	1
Latency-associated peptide transforming growth factor beta 1 levels	Psoriatic_arthritis	-0.549103	0.518301	0.289405	0.740536
Leukemia inhibitory factor levels	Psoriatic_arthritis	0.563357	0.765583	0.46182	0.873442
Leukemia inhibitory factor receptor levels	Psoriatic_arthritis	0.239775	0.422733	0.570576	0.902548
Monocyte chemoattractant protein-1 levels	Psoriatic_arthritis	0.416915	0.355377	0.24073	0.910586
Monocyte chemoattractant protein 2 levels	Psoriatic_arthritis	-0.323591	0.42628	0.447791	0.885404
Monocyte chemoattractant protein-3 levels	Psoriatic_arthritis	-0.0954383	0.388918	0.806151	1
Monocyte chemoattractant protein-4 levels	Psoriatic_arthritis	-0.431393	0.270822	0.111182	1
Macrophage inflammatory protein 1a levels	Psoriatic_arthritis	0.126804	0.364148	0.727674	0.959206
Matrix metalloproteinase-1 levels	Psoriatic_arthritis	-0.486276	0.418077	0.244778	0.851828
Matrix metalloproteinase-10 levels	Psoriatic_arthritis	-0.543323	0.450586	0.227889	0.944111
Neurturin levels	Psoriatic_arthritis	-1.01968	0.820077	0.213721	1
Neurotrophin-3 levels	Psoriatic_arthritis	-0.433208	0.39699	0.27517	0.797993
Osteoprotegerin levels	Psoriatic_arthritis	0.0471299	0.310158	0.879223	0.956155
Oncostatin-M levels	Psoriatic_arthritis	-0.0257895	0.379818	0.945866	0.968121
Programmed cell death 1 ligand 1 levels	Psoriatic_arthritis	-0.610784	0.361125	0.0907731	1
Stem cell factor levels	Psoriatic_arthritis	0.113359	0.272267	0.677151	0.950196
SIR2-like protein 2 levels	Psoriatic_arthritis	-1.02401	0.619086	0.098114	1
Signaling lymphocytic activation molecule levels	Psoriatic_arthritis	0.389197	0.281554	0.166874	0.907377
Sulfotransferase 1A1 levels	Psoriatic_arthritis	-0.547167	0.698176	0.433211	0.876497
STAM binding protein levels	Psoriatic_arthritis	-0.963935	0.671704	0.15127	1
Transforming growth factor-alpha levels	Psoriatic_arthritis	0.108364	0.349657	0.756625	0.982484
Tumor necrosis factor levels	Psoriatic_arthritis	2.0148	1.32379	0.128011	1
TNF-beta levels	Psoriatic_arthritis	1.09025	0.703368	0.12113	1
Tumor necrosis factor receptor superfamily member 9 levels	Psoriatic_arthritis	0.0461605	0.284678	0.871188	0.959409
Tumor necrosis factor ligand superfamily member 14 levels	Psoriatic_arthritis	-0.312911	0.516877	0.544922	0.894495
TNF-related apoptosis-inducing ligand levels	Psoriatic_arthritis	0.020191	0.277494	0.941995	0.975638
TNF-related activation-induced cytokine levels	Psoriatic_arthritis	-0.192915	0.286041	0.500038	0.906319
Thymic stromal lymphopoietin levels	Psoriatic_arthritis	-0.516957	0.417976	0.216157	1
Tumor necrosis factor ligand superfamily member 12 levels	Psoriatic_arthritis	0.0409191	0.325695	0.90002	0.954899
Urokinase-type plasminogen activator levels	Psoriatic_arthritis	0.0723969	0.298337	0.808263	0.990406
Vascular endothelial growth factor A levels	Psoriatic_arthritis	-0.225069	0.619682	0.716455	0.973931
class Actinobacteria	Seborrhoeic_dermatitis	0.0736911	0.208344	0.723564	1
class Alphaproteobacteria	Seborrhoeic_dermatitis	-0.254468	0.359914	0.479552	1
class Bacilli	Seborrhoeic_dermatitis	0.489789	0.414907	0.23781	1
class Bacteroidia	Seborrhoeic_dermatitis	0.232556	0.384605	0.545404	1
class Betaproteobacteria	Seborrhoeic_dermatitis	0.0129704	0.703904	0.985299	0.992652
class Clostridia	Seborrhoeic_dermatitis	0.172612	0.334309	0.605627	1
class Deltaproteobacteria	Seborrhoeic_dermatitis	0.0275334	0.287424	0.923684	1
class Erysipelotrichia	Seborrhoeic_dermatitis	0.676205	0.961045	0.481673	1
class Gammaproteobacteria	Seborrhoeic_dermatitis	0.0654151	0.210448	0.755925	1
class Methanobacteria	Seborrhoeic_dermatitis	0.252061	0.68755	0.713911	1
class Mollicutes	Seborrhoeic_dermatitis	0.360945	0.608362	0.552976	1
class Negativicutes	Seborrhoeic_dermatitis	1.17129	0.754318	0.120474	0.956708
class Verrucomicrobiae	Seborrhoeic_dermatitis	-1.01687	0.334922	0.00239634	0.161753
family Acidaminococcaceae	Seborrhoeic_dermatitis	0.753766	0.609399	0.216124	1
family Alcaligenaceae	Seborrhoeic_dermatitis	0.0677982	0.606694	0.911021	1
family Bacteroidaceae	Seborrhoeic_dermatitis	0.0818121	0.473492	0.862821	1
family Bifidobacteriaceae	Seborrhoeic_dermatitis	0.185088	0.227931	0.416771	1
family Christensenellaceae	Seborrhoeic_dermatitis	-0.575969	0.312919	0.0656755	0.985133
family Clostridiaceae1	Seborrhoeic_dermatitis	0.0547122	0.231473	0.813149	1
family Desulfovibrionaceae	Seborrhoeic_dermatitis	0.0441309	0.297625	0.882124	1
family Enterobacteriaceae	Seborrhoeic_dermatitis	-0.186403	0.349959	0.594282	1
family Erysipelotrichaceae	Seborrhoeic_dermatitis	0.676205	0.961045	0.481673	1
family FamilyXIII	Seborrhoeic_dermatitis	1.1794	2.60139	0.65028	1
family Lachnospiraceae	Seborrhoeic_dermatitis	0.134684	0.338079	0.690351	1
family Methanobacteriaceae	Seborrhoeic_dermatitis	0.251989	0.688974	0.714555	1
family Peptostreptococcaceae	Seborrhoeic_dermatitis	0.0837134	0.209032	0.688802	1
family Porphyromonadaceae	Seborrhoeic_dermatitis	-0.0434298	0.277581	0.875672	1
family Prevotellaceae	Seborrhoeic_dermatitis	0.0105733	0.455888	0.981497	0.996256
family Rhodospirillaceae	Seborrhoeic_dermatitis	0.145953	0.474989	0.758632	1
family Ruminococcaceae	Seborrhoeic_dermatitis	0.0324546	0.395508	0.934601	1
family Streptococcaceae	Seborrhoeic_dermatitis	0.63301	0.323927	0.0506809	0.85524
family Veillonellaceae	Seborrhoeic_dermatitis	-0.349487	0.322051	0.277837	1
family Verrucomicrobiaceae	Seborrhoeic_dermatitis	-1.01691	0.335066	0.00240568	0.0811917
genus Clostridiuminnocuumgroup	Seborrhoeic_dermatitis	0.178748	0.498736	0.720042	1
genus Eubacteriumbrachygroup	Seborrhoeic_dermatitis	-1.25091	1.59059	0.431609	1
genus Eubacteriumcoprostanoligenesgroup	Seborrhoeic_dermatitis	0.680683	0.428601	0.112252	1
genus Eubacteriumeligensgroup	Seborrhoeic_dermatitis	0.0238754	0.424553	0.955153	0.999579
genus Eubacteriumhalliigroup	Seborrhoeic_dermatitis	-0.199241	0.363539	0.583652	1
genus Eubacteriumoxidoreducensgroup	Seborrhoeic_dermatitis	0.253007	0.743821	0.733747	1
genus Eubacteriumrectalegroup	Seborrhoeic_dermatitis	0.252755	0.910259	0.781263	1
genus Eubacteriumruminantiumgroup	Seborrhoeic_dermatitis	0.0421287	0.359841	0.9068	1
genus Eubacteriumxylanophilumgroup	Seborrhoeic_dermatitis	0.43677	0.279125	0.117634	0.992536
genus Ruminococcusgauvreauiigroup	Seborrhoeic_dermatitis	0.410334	0.534756	0.442886	1
genus Actinomyces	Seborrhoeic_dermatitis	0.0549868	0.784808	0.944143	1
genus Adlercreutzia	Seborrhoeic_dermatitis	-0.466175	0.691223	0.500044	1
genus Akkermansia	Seborrhoeic_dermatitis	-1.0053	0.333008	0.00253746	0.0685114
genus Alistipes	Seborrhoeic_dermatitis	0.142643	1.19216	0.90476	1
genus Allisonella	Seborrhoeic_dermatitis	0.437446	0.78199	0.575888	1
genus Anaerofilum	Seborrhoeic_dermatitis	0.809433	0.590688	0.170586	1
genus Anaerostipes	Seborrhoeic_dermatitis	0.227083	0.290046	0.433674	1
genus Anaerotruncus	Seborrhoeic_dermatitis	0.576435	0.353933	0.103386	1
genus Bacteroides	Seborrhoeic_dermatitis	0.0818121	0.473492	0.862821	1
genus Barnesiella	Seborrhoeic_dermatitis	-0.127082	0.348173	0.715114	1
genus Bifidobacterium	Seborrhoeic_dermatitis	0.128681	0.232453	0.579867	1
genus Bilophila	Seborrhoeic_dermatitis	0.0875252	0.465866	0.850973	1
genus Blautia	Seborrhoeic_dermatitis	-0.0641436	0.222534	0.773162	1
genus Butyricicoccus	Seborrhoeic_dermatitis	0.42116	1.29132	0.744313	1
genus Butyricimonas	Seborrhoeic_dermatitis	0.687752	0.446748	0.123692	0.834918
genus Catenibacterium	Seborrhoeic_dermatitis	-2.54768	2.07673	0.219908	1
genus ChristensenellaceaeR.7group	Seborrhoeic_dermatitis	-0.403919	0.267735	0.131388	0.844635
genus Clostridiumsensustricto1	Seborrhoeic_dermatitis	0.0617888	0.250625	0.805265	1
genus Collinsella	Seborrhoeic_dermatitis	-2.9687	1.64854	0.0717334	0.880365
genus Coprobacter	Seborrhoeic_dermatitis	-0.290995	0.356645	0.414545	1
genus Coprococcus1	Seborrhoeic_dermatitis	-0.137416	0.577879	0.812041	1
genus Coprococcus2	Seborrhoeic_dermatitis	0.521471	0.337632	0.122468	0.870169
genus Coprococcus3	Seborrhoeic_dermatitis	0.656312	0.509941	0.198082	1
genus Eggerthella	Seborrhoeic_dermatitis	-0.0357897	0.302955	0.90596	1
genus Eisenbergiella	Seborrhoeic_dermatitis	0.160642	0.616709	0.794491	1
genus Enterorhabdus	Seborrhoeic_dermatitis	0.276003	0.428462	0.519464	1
genus Erysipelatoclostridium	Seborrhoeic_dermatitis	-0.285837	0.29008	0.324441	1
genus ErysipelotrichaceaeUCG003	Seborrhoeic_dermatitis	-0.0170162	0.306117	0.955671	0.984851
genus Escherichia.Shigella	Seborrhoeic_dermatitis	-0.585049	0.542775	0.281085	1
genus Faecalibacterium	Seborrhoeic_dermatitis	-0.232437	0.394483	0.555715	1
genus FamilyXIIIAD3011group	Seborrhoeic_dermatitis	0.304048	0.396455	0.443132	1
genus Flavonifractor	Seborrhoeic_dermatitis	0.0185671	0.298323	0.950373	1
genus Fusicatenibacter	Seborrhoeic_dermatitis	1.02434	1.03449	0.322083	1
genus Haemophilus	Seborrhoeic_dermatitis	1.55775	1.20034	0.194372	1
genus Holdemania	Seborrhoeic_dermatitis	-0.852385	0.53193	0.109058	1
genus Intestinibacter	Seborrhoeic_dermatitis	-0.177238	0.284308	0.53302	1
genus Lachnoclostridium	Seborrhoeic_dermatitis	0.287401	0.266277	0.280442	1
genus Lachnospira	Seborrhoeic_dermatitis	-1.88831	2.36742	0.42509	1
genus LachnospiraceaeFCS020group	Seborrhoeic_dermatitis	0.267724	0.208795	0.199761	1
genus LachnospiraceaeNC2004group	Seborrhoeic_dermatitis	0.569245	0.51821	0.271993	1
genus LachnospiraceaeUCG004	Seborrhoeic_dermatitis	0.265459	0.341998	0.437631	1
genus LachnospiraceaeUCG010	Seborrhoeic_dermatitis	0.892181	0.434937	0.0402391	0.776039
genus Marvinbryantia	Seborrhoeic_dermatitis	0.803175	1.67821	0.632231	1
genus Methanobrevibacter	Seborrhoeic_dermatitis	-0.102024	0.461742	0.825127	1
genus Olsenella	Seborrhoeic_dermatitis	-0.140888	2.78692	0.959682	0.981493
genus Oscillospira	Seborrhoeic_dermatitis	-0.177016	0.428478	0.679513	1
genus Parabacteroides	Seborrhoeic_dermatitis	-0.437478	0.396076	0.269363	1
genus Parasutterella	Seborrhoeic_dermatitis	-0.117911	0.732601	0.872134	1
genus Peptococcus	Seborrhoeic_dermatitis	-0.70175	1.09789	0.522706	1
genus Prevotella7	Seborrhoeic_dermatitis	0.186262	0.68857	0.786772	1
genus RikenellaceaeRC9gutgroup	Seborrhoeic_dermatitis	-0.142735	0.383451	0.709716	1
genus Romboutsia	Seborrhoeic_dermatitis	0.225599	0.471329	0.632191	1
genus Roseburia	Seborrhoeic_dermatitis	0.341525	0.414198	0.409631	1
genus Ruminiclostridium9	Seborrhoeic_dermatitis	0.0507074	0.173022	0.76947	1
genus RuminococcaceaeNK4A214group	Seborrhoeic_dermatitis	0.356627	0.472154	0.450057	1
genus RuminococcaceaeUCG002	Seborrhoeic_dermatitis	0.0739107	0.401114	0.853807	1
genus RuminococcaceaeUCG003	Seborrhoeic_dermatitis	-0.0266514	0.454389	0.953228	1
genus RuminococcaceaeUCG004	Seborrhoeic_dermatitis	0.182038	0.435495	0.675945	1
genus RuminococcaceaeUCG005	Seborrhoeic_dermatitis	-0.138566	0.314338	0.659344	1
genus RuminococcaceaeUCG010	Seborrhoeic_dermatitis	-0.319373	0.447303	0.475229	1
genus RuminococcaceaeUCG011	Seborrhoeic_dermatitis	-1.11135	2.20913	0.614915	1
genus RuminococcaceaeUCG014	Seborrhoeic_dermatitis	-0.823575	0.374977	0.028068	0.631531
genus Ruminococcus2	Seborrhoeic_dermatitis	0.471341	0.314266	0.133663	0.820206
genus Sellimonas	Seborrhoeic_dermatitis	-0.183399	0.32845	0.576588	1
genus Slackia	Seborrhoeic_dermatitis	-0.238007	0.306628	0.437625	1
genus Streptococcus	Seborrhoeic_dermatitis	0.800627	0.435535	0.0660241	0.891325
genus Subdoligranulum	Seborrhoeic_dermatitis	-0.325075	0.369125	0.3785	1
genus Sutterella	Seborrhoeic_dermatitis	-0.020213	0.360809	0.955325	0.992068
genus Terrisporobacter	Seborrhoeic_dermatitis	-0.0195137	0.325713	0.952227	1
genus Turicibacter	Seborrhoeic_dermatitis	0.874811	0.531145	0.0995523	1
genus Veillonella	Seborrhoeic_dermatitis	1.17954	1.35263	0.383189	1
order Bacteroidales	Seborrhoeic_dermatitis	0.23261	0.384698	0.545407	1
order Bifidobacteriales	Seborrhoeic_dermatitis	0.185088	0.227931	0.416771	1
order Burkholderiales	Seborrhoeic_dermatitis	-0.0552511	0.803057	0.945148	1
order Clostridiales	Seborrhoeic_dermatitis	0.178713	0.329445	0.587497	1
order Desulfovibrionales	Seborrhoeic_dermatitis	0.0375313	0.29147	0.897543	1
order Enterobacteriales	Seborrhoeic_dermatitis	-0.186403	0.349959	0.594282	1
order Erysipelotrichales	Seborrhoeic_dermatitis	0.676205	0.961045	0.481673	1
order Lactobacillales	Seborrhoeic_dermatitis	0.415449	0.38716	0.283241	1
order Methanobacteriales	Seborrhoeic_dermatitis	0.252061	0.68755	0.713911	1
order MollicutesRF9	Seborrhoeic_dermatitis	0.343864	0.826797	0.677484	1
order Rhodospirillales	Seborrhoeic_dermatitis	-0.00266721	0.501184	0.995754	0.995754
order Selenomonadales	Seborrhoeic_dermatitis	1.17129	0.754318	0.120474	0.903558
order Verrucomicrobiales	Seborrhoeic_dermatitis	-1.01687	0.334922	0.00239634	0.107836
phylum Actinobacteria	Seborrhoeic_dermatitis	-0.302304	0.264206	0.252542	1
phylum Bacteroidetes	Seborrhoeic_dermatitis	0.26089	0.384695	0.497661	1
phylum Cyanobacteria	Seborrhoeic_dermatitis	0.543248	1.4179	0.70162	1
phylum Euryarchaeota	Seborrhoeic_dermatitis	0.234581	0.445745	0.598703	1
phylum Firmicutes	Seborrhoeic_dermatitis	0.370456	0.615317	0.547136	1
phylum Proteobacteria	Seborrhoeic_dermatitis	0.181035	0.296543	0.541539	1
phylum Tenericutes	Seborrhoeic_dermatitis	0.360945	0.608362	0.552976	1
phylum Verrucomicrobia	Seborrhoeic_dermatitis	-1.13854	0.330528	0.000571912	0.0772081
Eukaryotic translation initiation factor 4E-binding protein 1 levels	Seborrheic_dermatitis	0.0861336	0.263269	0.743539	1
Adenosine Deaminase levels	Seborrheic_dermatitis	0.464775	1.07353	0.665058	1
Artemin levels	Seborrheic_dermatitis	-0.274406	0.606782	0.651102	1
Axin-1 levels	Seborrheic_dermatitis	0.228165	0.30973	0.46133	1
beta-nerve growth factor levels	Seborrheic_dermatitis	0.0470742	0.245787	0.848115	0.983813
Caspase 8 levels	Seborrheic_dermatitis	0.102415	0.336805	0.761069	1
Eotaxin levels	Seborrheic_dermatitis	-0.163724	0.220328	0.457427	1
C-C motif chemokine 19 levels	Seborrheic_dermatitis	-0.168351	0.174858	0.335652	1
C-C motif chemokine 20 levels	Seborrheic_dermatitis	0.075018	0.203147	0.711919	1
C-C motif chemokine 23 levels	Seborrheic_dermatitis	-0.392222	0.375709	0.296508	1
C-C motif chemokine 25 levels	Seborrheic_dermatitis	-0.360836	0.231411	0.118929	1
C-C motif chemokine 28 levels	Seborrheic_dermatitis	-0.121299	0.181524	0.50399	1
C-C motif chemokine 4 levels	Seborrheic_dermatitis	-0.195802	0.171739	0.254238	1
Natural killer cell receptor 2B4 levels	Seborrheic_dermatitis	0.185142	0.204941	0.366316	1
CD40L receptor levels	Seborrheic_dermatitis	0.24084	0.320918	0.452971	1
T-cell surface glycoprotein CD5 levels	Seborrheic_dermatitis	0.0847483	0.158503	0.592871	1
T-cell surface glycoprotein CD6 isoform levels	Seborrheic_dermatitis	-0.0597121	0.212668	0.778882	1
CUB domain-containing protein 1 levels	Seborrheic_dermatitis	0.101593	0.216981	0.639632	1
Macrophage colony-stimulating factor 1 levels	Seborrheic_dermatitis	0.150465	0.224619	0.502942	1
Cystatin D levels	Seborrheic_dermatitis	-0.253081	0.163137	0.120821	1
Fractalkine levels	Seborrheic_dermatitis	-0.0893608	0.242971	0.713034	1
C-X-C motif chemokine 1 levels	Seborrheic_dermatitis	-0.306766	0.586437	0.600904	1
C-X-C motif chemokine 10 levels	Seborrheic_dermatitis	-0.211467	0.19399	0.275673	1
C-X-C motif chemokine 11 levels	Seborrheic_dermatitis	0.057619	0.16986	0.734448	1
C-X-C motif chemokine 5 levels	Seborrheic_dermatitis	-0.122555	0.237457	0.605774	1
C-X-C motif chemokine 6 levels	Seborrheic_dermatitis	-0.03815	0.192468	0.842877	0.99095
C-X-C motif chemokine 9 levels	Seborrheic_dermatitis	-0.243415	0.220615	0.269875	1
Delta and Notch-like epidermal growth factor-related receptor levels	Seborrheic_dermatitis	-0.272349	0.242537	0.261472	1
Protein S100-A12 levels	Seborrheic_dermatitis	-0.481346	0.238405	0.0434845	1
Fibroblast growth factor 19 levels	Seborrheic_dermatitis	-0.163608	0.241043	0.497296	1
Fibroblast growth factor 21 levels	Seborrheic_dermatitis	-0.075097	0.19867	0.705432	1
Fibroblast growth factor 23 levels	Seborrheic_dermatitis	-0.0849277	0.209302	0.684915	1
Fibroblast growth factor 5 levels	Seborrheic_dermatitis	0.0361473	0.340643	0.915491	0.983305
Fms-related tyrosine kinase 3 ligand levels	Seborrheic_dermatitis	0.0562739	0.175719	0.74878	1
Glial cell line-derived neurotrophic factor levels	Seborrheic_dermatitis	-0.0103342	0.28684	0.97126	0.994113
Hepatocyte growth factor levels	Seborrheic_dermatitis	-0.210988	0.286764	0.461879	1
Interferon gamma levels	Seborrheic_dermatitis	-0.159176	0.403026	0.692879	1
Interleukin-10 levels	Seborrheic_dermatitis	-0.0502915	0.242036	0.835397	1
Interleukin-10 receptor subunit alpha levels	Seborrheic_dermatitis	0.0567972	0.284334	0.841672	1
Interleukin-10 receptor subunit beta levels	Seborrheic_dermatitis	-0.25774	0.185594	0.164915	1
Interleukin-12 subunit beta levels	Seborrheic_dermatitis	-0.0295843	0.217573	0.891842	0.982155
Interleukin-15 receptor subunit alpha levels	Seborrheic_dermatitis	-0.0815163	0.381661	0.830872	1
Interleukin-17A levels	Seborrheic_dermatitis	-0.0721403	0.204514	0.724283	1
Interleukin-17C levels	Seborrheic_dermatitis	-0.125974	0.203825	0.536541	1
Interleukin-18 levels	Seborrheic_dermatitis	0.00787035	0.23698	0.973506	0.984826
interleukin-18 receptor 1 levels	Seborrheic_dermatitis	-0.0446847	0.366509	0.902963	0.981972
Interleukin-1-alpha levels	Seborrheic_dermatitis	0.234251	0.415922	0.573292	1
Interleukin-2 levels	Seborrheic_dermatitis	0.479747	0.257001	0.0619423	1
Interleukin-20 levels	Seborrheic_dermatitis	-0.245486	0.291765	0.400134	1
Interleukin-22 receptor subunit alpha-1 levels	Seborrheic_dermatitis	0.0124892	0.302704	0.96709	1
Interleukin-24 levels	Seborrheic_dermatitis	0.165382	0.691697	0.811031	1
Interleukin-2 receptor subunit beta levels	Seborrheic_dermatitis	0.248557	0.291074	0.393144	1
Interleukin-4 levels	Seborrheic_dermatitis	0.0591097	0.282482	0.834252	1
Interleukin-6 levels	Seborrheic_dermatitis	-0.414239	0.365042	0.256471	1
Interleukin-7 levels	Seborrheic_dermatitis	-0.174866	0.230636	0.448337	1
Interleukin-8 levels	Seborrheic_dermatitis	-0.146276	0.4141	0.72391	1
Latency-associated peptide transforming growth factor beta 1 levels	Seborrheic_dermatitis	-0.107717	0.294482	0.714525	1
Leukemia inhibitory factor levels	Seborrheic_dermatitis	-0.133438	0.424759	0.753407	1
Leukemia inhibitory factor receptor levels	Seborrheic_dermatitis	-0.193019	0.340247	0.570517	1
Monocyte chemoattractant protein-1 levels	Seborrheic_dermatitis	0.31669	0.23783	0.182996	1
Monocyte chemoattractant protein 2 levels	Seborrheic_dermatitis	0.205191	0.259733	0.429524	1
Monocyte chemoattractant protein-3 levels	Seborrheic_dermatitis	0.186069	0.245661	0.448798	1
Monocyte chemoattractant protein-4 levels	Seborrheic_dermatitis	-0.0744761	0.158893	0.63927	1
Macrophage inflammatory protein 1a levels	Seborrheic_dermatitis	-0.361281	0.225572	0.10924	1
Matrix metalloproteinase-1 levels	Seborrheic_dermatitis	-0.0329888	0.236644	0.889132	0.991724
Matrix metalloproteinase-10 levels	Seborrheic_dermatitis	-0.260087	0.30609	0.395488	1
Neurturin levels	Seborrheic_dermatitis	0.0107526	0.473556	0.981885	0.981885
Neurotrophin-3 levels	Seborrheic_dermatitis	0.287793	0.274386	0.294243	1
Osteoprotegerin levels	Seborrheic_dermatitis	-0.166524	0.270992	0.538885	1
Oncostatin-M levels	Seborrheic_dermatitis	-0.0212254	0.200729	0.915787	0.971628
Programmed cell death 1 ligand 1 levels	Seborrheic_dermatitis	-0.19512	0.245789	0.427282	1
Stem cell factor levels	Seborrheic_dermatitis	0.0431951	0.168447	0.797617	1
SIR2-like protein 2 levels	Seborrheic_dermatitis	0.166648	0.346552	0.630605	1
Signaling lymphocytic activation molecule levels	Seborrheic_dermatitis	0.148522	0.16826	0.377402	1
Sulfotransferase 1A1 levels	Seborrheic_dermatitis	0.644494	0.49033	0.188709	1
STAM binding protein levels	Seborrheic_dermatitis	0.174625	0.372436	0.639161	1
Transforming growth factor-alpha levels	Seborrheic_dermatitis	0.0100083	0.223123	0.964223	1
Tumor necrosis factor levels	Seborrheic_dermatitis	1.06565	0.835239	0.202004	1
TNF-beta levels	Seborrheic_dermatitis	-0.179238	0.47142	0.703791	1
Tumor necrosis factor receptor superfamily member 9 levels	Seborrheic_dermatitis	-0.23304	0.168797	0.167402	1
Tumor necrosis factor ligand superfamily member 14 levels	Seborrheic_dermatitis	0.0380053	0.263966	0.885518	1
TNF-related apoptosis-inducing ligand levels	Seborrheic_dermatitis	-0.156045	0.208644	0.45452	1
TNF-related activation-induced cytokine levels	Seborrheic_dermatitis	-0.0281223	0.172308	0.870353	0.996325
Thymic stromal lymphopoietin levels	Seborrheic_dermatitis	0.325725	0.268948	0.225854	1
Tumor necrosis factor ligand superfamily member 12 levels	Seborrheic_dermatitis	0.0937811	0.246555	0.703674	1
Urokinase-type plasminogen activator levels	Seborrheic_dermatitis	-0.160998	0.21558	0.455177	1
Vascular endothelial growth factor A levels	Seborrheic_dermatitis	0.156132	0.368556	0.671834	1

## Sheet: Table S4
Table S4: Instrumental variables used in MR analyisis between gut microbiota and inflammatory skin diseases
chr.exposure	pos.exposure	beta.exposure	se.exposure	pval.exposure	samplesize.exposure	id.exposure	SNP	effect_allele.exposure	other_allele.exposure	eaf.exposure	exposure	mr_keep.exposure
1	105422565	-0.0655342	0.0142231	4.13409e-06	14306	ebi-a-GCST90017108	rs11184341	C	G	NA	Gut microbiota abundance (order Verrucomicrobiales id.4030)	TRUE
1	41074472	-0.0758309	0.0167762	6.7228e-06	14306	ebi-a-GCST90017108	rs61779207	G	A	NA	Gut microbiota abundance (order Verrucomicrobiales id.4030)	TRUE
4	100544188	0.112164	0.0236422	1.63222e-06	14306	ebi-a-GCST90017108	rs74542928	T	C	NA	Gut microbiota abundance (order Verrucomicrobiales id.4030)	TRUE
4	95027272	0.0749798	0.0150177	6.73085e-07	14306	ebi-a-GCST90017108	rs11729256	T	C	NA	Gut microbiota abundance (order Verrucomicrobiales id.4030)	TRUE
6	56341481	-0.0704036	0.0147128	2.53688e-06	14306	ebi-a-GCST90017108	rs9349825	A	G	NA	Gut microbiota abundance (order Verrucomicrobiales id.4030)	TRUE
10	5064327	-0.0689292	0.0147693	2.63615e-06	14306	ebi-a-GCST90017108	rs4242783	A	G	NA	Gut microbiota abundance (order Verrucomicrobiales id.4030)	TRUE
11	130280667	-0.0648843	0.0135928	1.1222e-06	14306	ebi-a-GCST90017108	rs4936098	G	A	NA	Gut microbiota abundance (order Verrucomicrobiales id.4030)	TRUE
12	130309670	0.090699	0.0196746	3.73844e-06	14306	ebi-a-GCST90017108	rs111862613	T	C	NA	Gut microbiota abundance (order Verrucomicrobiales id.4030)	TRUE
15	97570657	0.0618926	0.0130946	2.17165e-06	14306	ebi-a-GCST90017108	rs12908520	G	A	NA	Gut microbiota abundance (order Verrucomicrobiales id.4030)	TRUE
16	81063149	-0.0746844	0.0156194	2.58297e-06	14306	ebi-a-GCST90017108	rs2602429	T	C	NA	Gut microbiota abundance (order Verrucomicrobiales id.4030)	TRUE
18	49473635	0.204683	0.0431572	2.91823e-06	14306	ebi-a-GCST90017108	rs117107102	A	G	NA	Gut microbiota abundance (order Verrucomicrobiales id.4030)	TRUE
20	31867840	-0.0631436	0.0143767	9.60993e-06	14306	ebi-a-GCST90017108	rs941682	G	A	NA	Gut microbiota abundance (order Verrucomicrobiales id.4030)	TRUE
2	125440268	0.115986	0.0230271	6.18885e-07	14306	ebi-a-GCST90017113	rs10202904	G	T	NA	Gut microbiota abundance (phylum Euryarchaeota id.55)	TRUE
3	15019595	-0.197523	0.0414497	2.74069e-06	14306	ebi-a-GCST90017113	rs73031978	C	G	NA	Gut microbiota abundance (phylum Euryarchaeota id.55)	TRUE
3	15591607	-0.119983	0.0259356	4.635e-06	14306	ebi-a-GCST90017113	rs7635189	A	G	NA	Gut microbiota abundance (phylum Euryarchaeota id.55)	TRUE
4	104418307	0.203577	0.0440033	5.11929e-06	14306	ebi-a-GCST90017113	rs894996	C	A	NA	Gut microbiota abundance (phylum Euryarchaeota id.55)	TRUE
5	178160975	0.176759	0.0385787	5.30383e-06	14306	ebi-a-GCST90017113	rs56131665	G	A	NA	Gut microbiota abundance (phylum Euryarchaeota id.55)	TRUE
6	16284785	-0.160157	0.0340856	4.75423e-06	14306	ebi-a-GCST90017113	rs77658038	A	C	NA	Gut microbiota abundance (phylum Euryarchaeota id.55)	TRUE
6	146840876	0.19977	0.0425421	4.33092e-06	14306	ebi-a-GCST90017113	rs34928225	T	C	NA	Gut microbiota abundance (phylum Euryarchaeota id.55)	TRUE
8	58018853	-0.118111	0.0264389	7.19863e-06	14306	ebi-a-GCST90017113	rs7015093	G	A	NA	Gut microbiota abundance (phylum Euryarchaeota id.55)	TRUE
11	13893667	0.10373	0.0228889	7.73001e-06	14306	ebi-a-GCST90017113	rs11022995	A	G	NA	Gut microbiota abundance (phylum Euryarchaeota id.55)	TRUE
13	41963791	0.214866	0.0438442	1.04621e-06	14306	ebi-a-GCST90017113	rs76029318	T	C	NA	Gut microbiota abundance (phylum Euryarchaeota id.55)	TRUE
19	28827760	-0.150529	0.0337091	8.12363e-06	14306	ebi-a-GCST90017113	rs6508769	C	T	NA	Gut microbiota abundance (phylum Euryarchaeota id.55)	TRUE
20	56042866	-0.123612	0.0275749	9.3377e-06	14306	ebi-a-GCST90017113	rs6064552	T	C	NA	Gut microbiota abundance (phylum Euryarchaeota id.55)	TRUE
21	27368994	-0.131882	0.029229	5.32451e-06	14306	ebi-a-GCST90017113	rs45498998	G	A	NA	Gut microbiota abundance (phylum Euryarchaeota id.55)	TRUE
1	24927625	-0.0616691	0.0125259	7.20444e-07	14306	ebi-a-GCST90017011	rs4378146	A	C	NA	Gut microbiota abundance (genus Fusicatenibacter id.11305)	TRUE
2	5532793	0.0508345	0.0113843	8.49533e-06	14306	ebi-a-GCST90017011	rs792108	C	T	NA	Gut microbiota abundance (genus Fusicatenibacter id.11305)	TRUE
2	226649570	-0.0710571	0.015924	4.54527e-06	14306	ebi-a-GCST90017011	rs62187631	T	C	NA	Gut microbiota abundance (genus Fusicatenibacter id.11305)	TRUE
3	64252803	-0.0739124	0.0151073	7.77428e-07	14306	ebi-a-GCST90017011	rs704418	C	T	NA	Gut microbiota abundance (genus Fusicatenibacter id.11305)	TRUE
5	29595000	-0.0701397	0.0145589	1.56769e-06	14306	ebi-a-GCST90017011	rs62353480	A	G	NA	Gut microbiota abundance (genus Fusicatenibacter id.11305)	TRUE
7	148856720	0.0492427	0.0109365	5.46739e-06	14306	ebi-a-GCST90017011	rs60254196	G	A	NA	Gut microbiota abundance (genus Fusicatenibacter id.11305)	TRUE
8	15360718	-0.0771914	0.0160344	1.07686e-06	14306	ebi-a-GCST90017011	rs2132128	G	A	NA	Gut microbiota abundance (genus Fusicatenibacter id.11305)	TRUE
9	130371107	0.0497415	0.0107941	3.94176e-06	14306	ebi-a-GCST90017011	rs2039204	A	T	NA	Gut microbiota abundance (genus Fusicatenibacter id.11305)	TRUE
10	120447429	-0.0953657	0.020407	3.93895e-06	14306	ebi-a-GCST90017011	rs3303	T	C	NA	Gut microbiota abundance (genus Fusicatenibacter id.11305)	TRUE
10	112177119	-0.0967298	0.0205426	2.98834e-06	14306	ebi-a-GCST90017011	rs2025938	G	A	NA	Gut microbiota abundance (genus Fusicatenibacter id.11305)	TRUE
12	58658311	-0.0597324	0.0134458	8.29564e-06	14306	ebi-a-GCST90017011	rs73103914	A	G	NA	Gut microbiota abundance (genus Fusicatenibacter id.11305)	TRUE
15	88353215	0.0792146	0.0180505	8.06325e-06	14306	ebi-a-GCST90017011	rs8028026	G	A	NA	Gut microbiota abundance (genus Fusicatenibacter id.11305)	TRUE
16	73821805	-0.104026	0.022217	4.9289e-06	14306	ebi-a-GCST90017011	rs8063430	T	C	NA	Gut microbiota abundance (genus Fusicatenibacter id.11305)	TRUE
17	70697344	-0.061617	0.0136576	7.30988e-06	14306	ebi-a-GCST90017011	rs9905659	G	A	NA	Gut microbiota abundance (genus Fusicatenibacter id.11305)	TRUE
17	70721782	-0.0494799	0.0108105	4.96158e-06	14306	ebi-a-GCST90017011	rs1864685	A	C	NA	Gut microbiota abundance (genus Fusicatenibacter id.11305)	TRUE
18	10370596	-0.0568339	0.0127894	8.95757e-06	14306	ebi-a-GCST90017011	rs206581	A	G	NA	Gut microbiota abundance (genus Fusicatenibacter id.11305)	TRUE
20	55937366	0.0659543	0.0148763	5.86894e-06	14306	ebi-a-GCST90017011	rs167879	T	C	NA	Gut microbiota abundance (genus Fusicatenibacter id.11305)	TRUE
20	25257001	0.141575	0.0313559	7.28652e-06	14306	ebi-a-GCST90017011	rs6515626	G	A	NA	Gut microbiota abundance (genus Fusicatenibacter id.11305)	TRUE
21	42681392	-0.0572129	0.0130007	7.68493e-06	14306	ebi-a-GCST90017011	rs10439674	A	G	NA	Gut microbiota abundance (genus Fusicatenibacter id.11305)	TRUE
2	192878532	0.0584045	0.0122081	1.57373e-06	14306	ebi-a-GCST90016929	rs13020688	G	A	NA	Gut microbiota abundance (family Bifidobacteriaceae id.433)	TRUE
2	136616754	-0.11707	0.0126703	5.94155e-20	14306	ebi-a-GCST90016929	rs182549	T	C	NA	Gut microbiota abundance (family Bifidobacteriaceae id.433)	TRUE
2	137603404	0.0637133	0.0144305	8.79792e-06	14306	ebi-a-GCST90016929	rs10496759	G	C	NA	Gut microbiota abundance (family Bifidobacteriaceae id.433)	TRUE
2	49906864	0.0577763	0.0117388	8.88055e-07	14306	ebi-a-GCST90016929	rs4567981	T	A	NA	Gut microbiota abundance (family Bifidobacteriaceae id.433)	TRUE
4	161211924	0.0562	0.0126395	7.24136e-06	14306	ebi-a-GCST90016929	rs10857328	T	A	NA	Gut microbiota abundance (family Bifidobacteriaceae id.433)	TRUE
4	1517826	0.053673	0.0120586	8.66204e-06	14306	ebi-a-GCST90016929	rs55888705	A	G	NA	Gut microbiota abundance (family Bifidobacteriaceae id.433)	TRUE
5	521096	0.0569873	0.0116907	1.1517e-06	14306	ebi-a-GCST90016929	rs4957061	T	C	NA	Gut microbiota abundance (family Bifidobacteriaceae id.433)	TRUE
5	142793467	-0.0942612	0.0208421	4.84953e-06	14306	ebi-a-GCST90016929	rs73797465	T	G	NA	Gut microbiota abundance (family Bifidobacteriaceae id.433)	TRUE
5	169748189	-0.0892981	0.0183177	1.03631e-06	14306	ebi-a-GCST90016929	rs76671854	C	G	NA	Gut microbiota abundance (family Bifidobacteriaceae id.433)	TRUE
6	14617591	0.0553965	0.0120669	3.8249e-06	14306	ebi-a-GCST90016929	rs857444	C	T	NA	Gut microbiota abundance (family Bifidobacteriaceae id.433)	TRUE
6	97406220	-0.0914312	0.0202604	7.27998e-06	14306	ebi-a-GCST90016929	rs6899771	A	G	NA	Gut microbiota abundance (family Bifidobacteriaceae id.433)	TRUE
11	13098051	0.0537537	0.0123746	9.94741e-06	14306	ebi-a-GCST90016929	rs10831953	G	A	NA	Gut microbiota abundance (family Bifidobacteriaceae id.433)	TRUE
12	20378911	-0.0613031	0.0128844	2.28066e-06	14306	ebi-a-GCST90016929	rs10841473	G	C	NA	Gut microbiota abundance (family Bifidobacteriaceae id.433)	TRUE
13	112859829	0.110676	0.0200996	1.74032e-08	14306	ebi-a-GCST90016929	rs7322849	T	C	NA	Gut microbiota abundance (family Bifidobacteriaceae id.433)	TRUE
15	92463303	-0.0551726	0.0124655	6.86784e-06	14306	ebi-a-GCST90016929	rs7174549	T	C	NA	Gut microbiota abundance (family Bifidobacteriaceae id.433)	TRUE
16	898055	0.0810099	0.019073	8.52884e-06	14306	ebi-a-GCST90016929	rs12446429	T	C	NA	Gut microbiota abundance (family Bifidobacteriaceae id.433)	TRUE
17	72897722	-0.0632518	0.013817	5.36809e-06	14306	ebi-a-GCST90016929	rs540489	T	G	NA	Gut microbiota abundance (family Bifidobacteriaceae id.433)	TRUE
18	4304187	-0.0728589	0.0164821	6.00109e-06	14306	ebi-a-GCST90016929	rs677208	C	G	NA	Gut microbiota abundance (family Bifidobacteriaceae id.433)	TRUE
1	216223782	0.16763	0.0379501	9.28346e-06	14306	ebi-a-GCST90017042	rs12069354	C	T	NA	Gut microbiota abundance (genus Peptococcus id.2037)	TRUE
1	75971700	0.137957	0.0302965	8.55342e-06	14306	ebi-a-GCST90017042	rs74592222	G	A	NA	Gut microbiota abundance (genus Peptococcus id.2037)	TRUE
2	33691809	-0.0895433	0.0188332	2.14166e-06	14306	ebi-a-GCST90017042	rs2054133	A	G	NA	Gut microbiota abundance (genus Peptococcus id.2037)	TRUE
3	17793504	0.181434	0.0319429	1.09883e-08	14306	ebi-a-GCST90017042	rs75754569	C	G	NA	Gut microbiota abundance (genus Peptococcus id.2037)	TRUE
4	35358594	0.121167	0.0225844	1.23637e-07	14306	ebi-a-GCST90017042	rs10031059	C	T	NA	Gut microbiota abundance (genus Peptococcus id.2037)	TRUE
6	99020289	-0.135311	0.0289742	1.14731e-06	14306	ebi-a-GCST90017042	rs6918730	A	G	NA	Gut microbiota abundance (genus Peptococcus id.2037)	TRUE
6	162239191	0.0976832	0.0214155	3.50768e-06	14306	ebi-a-GCST90017042	rs7766680	G	C	NA	Gut microbiota abundance (genus Peptococcus id.2037)	TRUE
9	104595848	-0.090152	0.018995	2.21958e-06	14306	ebi-a-GCST90017042	rs7033353	G	T	NA	Gut microbiota abundance (genus Peptococcus id.2037)	TRUE
10	78716030	-0.195611	0.0392217	1.32859e-06	14306	ebi-a-GCST90017042	rs11001941	G	A	NA	Gut microbiota abundance (genus Peptococcus id.2037)	TRUE
11	968356	-0.134304	0.0300423	5.74156e-06	14306	ebi-a-GCST90017042	rs72850165	T	C	NA	Gut microbiota abundance (genus Peptococcus id.2037)	TRUE
11	4019788	-0.17402	0.0374133	3.1299e-06	14306	ebi-a-GCST90017042	rs11030569	A	T	NA	Gut microbiota abundance (genus Peptococcus id.2037)	TRUE
13	91182556	0.200307	0.0387328	2.68838e-07	14306	ebi-a-GCST90017042	rs77681628	C	T	NA	Gut microbiota abundance (genus Peptococcus id.2037)	TRUE
14	57985112	0.110229	0.0237523	3.30088e-06	14306	ebi-a-GCST90017042	rs413827	G	A	NA	Gut microbiota abundance (genus Peptococcus id.2037)	TRUE
15	75073172	0.191797	0.0399832	1.83535e-06	14306	ebi-a-GCST90017042	rs34282744	G	C	NA	Gut microbiota abundance (genus Peptococcus id.2037)	TRUE
20	43118017	-0.14067	0.030628	6.98715e-06	14306	ebi-a-GCST90017042	rs36121075	A	G	NA	Gut microbiota abundance (genus Peptococcus id.2037)	TRUE
22	50973113	0.162018	0.0356813	3.21959e-06	14306	ebi-a-GCST90017042	rs5770862	T	C	NA	Gut microbiota abundance (genus Peptococcus id.2037)	TRUE
3	101352439	-0.0969809	0.021925	9.82969e-06	14306	ebi-a-GCST90016959	rs71315246	A	G	NA	Gut microbiota abundance (genus Actinomyces id.423)	TRUE
6	67207371	0.126596	0.0268461	4.48528e-06	14306	ebi-a-GCST90016959	rs34583783	G	T	NA	Gut microbiota abundance (genus Actinomyces id.423)	TRUE
6	169224781	0.0749687	0.0167368	7.94273e-06	14306	ebi-a-GCST90016959	rs4073240	G	A	NA	Gut microbiota abundance (genus Actinomyces id.423)	TRUE
6	133007480	0.232634	0.0512044	6.33826e-06	14306	ebi-a-GCST90016959	rs35011108	A	G	NA	Gut microbiota abundance (genus Actinomyces id.423)	TRUE
10	4782841	0.0985224	0.0214182	4.49645e-06	14306	ebi-a-GCST90016959	rs4146653	G	A	NA	Gut microbiota abundance (genus Actinomyces id.423)	TRUE
10	121356829	0.094316	0.0213513	9.62299e-06	14306	ebi-a-GCST90016959	rs10787984	G	C	NA	Gut microbiota abundance (genus Actinomyces id.423)	TRUE
10	127532121	-0.18776	0.0401636	5.91984e-06	14306	ebi-a-GCST90016959	rs7915461	C	T	NA	Gut microbiota abundance (genus Actinomyces id.423)	TRUE
15	99492313	-0.0746684	0.0164822	6.27004e-06	14306	ebi-a-GCST90016959	rs2715439	T	C	NA	Gut microbiota abundance (genus Actinomyces id.423)	TRUE
2	71145246	-0.130842	0.0266671	7.37904e-07	14306	ebi-a-GCST90016999	rs3771393	T	C	NA	Gut microbiota abundance (genus Eubacterium fissicatena group id.14373)	TRUE
3	39604954	-0.139489	0.0316186	8.70062e-06	14306	ebi-a-GCST90016999	rs1768152	C	T	NA	Gut microbiota abundance (genus Eubacterium fissicatena group id.14373)	TRUE
6	39940437	0.111463	0.0252788	9.75326e-06	14306	ebi-a-GCST90016999	rs6934739	A	G	NA	Gut microbiota abundance (genus Eubacterium fissicatena group id.14373)	TRUE
7	73043561	0.20951	0.0454847	3.09678e-06	14306	ebi-a-GCST90016999	rs151257695	A	G	NA	Gut microbiota abundance (genus Eubacterium fissicatena group id.14373)	TRUE
8	5433699	0.109644	0.0228306	1.49091e-06	14306	ebi-a-GCST90016999	rs2733072	G	A	NA	Gut microbiota abundance (genus Eubacterium fissicatena group id.14373)	TRUE
10	96758467	0.10585	0.0237114	8.20012e-06	14306	ebi-a-GCST90016999	rs11818408	G	A	NA	Gut microbiota abundance (genus Eubacterium fissicatena group id.14373)	TRUE
11	115165111	0.138612	0.0291906	2.73149e-06	14306	ebi-a-GCST90016999	rs7104872	G	A	NA	Gut microbiota abundance (genus Eubacterium fissicatena group id.14373)	TRUE
14	89484373	0.172263	0.039601	8.27237e-06	14306	ebi-a-GCST90016999	rs10147907	T	G	NA	Gut microbiota abundance (genus Eubacterium fissicatena group id.14373)	TRUE
18	45753272	0.131469	0.0281712	2.66557e-06	14306	ebi-a-GCST90016999	rs11876297	T	C	NA	Gut microbiota abundance (genus Eubacterium fissicatena group id.14373)	TRUE
2	16056779	0.109751	0.0238636	4.21143e-06	14306	ebi-a-GCST90016943	rs934049	G	A	NA	Gut microbiota abundance (family Oxalobacteraceae id.2966)	TRUE
3	171947435	0.12561	0.0230053	4.87933e-08	14306	ebi-a-GCST90016943	rs4428215	G	A	NA	Gut microbiota abundance (family Oxalobacteraceae id.2966)	TRUE
4	84254259	-0.16332	0.0360823	8.04841e-06	14306	ebi-a-GCST90016943	rs12509763	C	G	NA	Gut microbiota abundance (family Oxalobacteraceae id.2966)	TRUE
4	67427392	-0.18756	0.0423688	6.64003e-06	14306	ebi-a-GCST90016943	rs80330081	A	C	NA	Gut microbiota abundance (family Oxalobacteraceae id.2966)	TRUE
4	189935314	0.181604	0.0398742	6.25792e-06	14306	ebi-a-GCST90016943	rs36057338	G	T	NA	Gut microbiota abundance (family Oxalobacteraceae id.2966)	TRUE
6	38550301	-0.140043	0.0281704	7.45178e-07	14306	ebi-a-GCST90016943	rs1569853	T	C	NA	Gut microbiota abundance (family Oxalobacteraceae id.2966)	TRUE
7	1794263	0.181521	0.0400608	7.4583e-06	14306	ebi-a-GCST90016943	rs62435498	C	A	NA	Gut microbiota abundance (family Oxalobacteraceae id.2966)	TRUE
9	87514407	-0.105642	0.0200648	1.49417e-07	14306	ebi-a-GCST90016943	rs736744	T	C	NA	Gut microbiota abundance (family Oxalobacteraceae id.2966)	TRUE
9	19682558	0.196145	0.044523	5.53197e-06	14306	ebi-a-GCST90016943	rs12002250	A	C	NA	Gut microbiota abundance (family Oxalobacteraceae id.2966)	TRUE
11	610277	-0.13607	0.0291797	4.50837e-06	14306	ebi-a-GCST90016943	rs11246212	C	T	NA	Gut microbiota abundance (family Oxalobacteraceae id.2966)	TRUE
12	18793583	0.105525	0.0236769	7.19383e-06	14306	ebi-a-GCST90016943	rs561239	A	G	NA	Gut microbiota abundance (family Oxalobacteraceae id.2966)	TRUE
13	23443627	-0.0921059	0.0201114	5.03733e-06	14306	ebi-a-GCST90016943	rs7993559	A	C	NA	Gut microbiota abundance (family Oxalobacteraceae id.2966)	TRUE
15	93941937	0.204031	0.0445746	4.56321e-06	14306	ebi-a-GCST90016943	rs111966731	T	C	NA	Gut microbiota abundance (family Oxalobacteraceae id.2966)	TRUE
16	5984558	-0.189444	0.0430248	8.09003e-06	14306	ebi-a-GCST90016943	rs17138946	G	T	NA	Gut microbiota abundance (family Oxalobacteraceae id.2966)	TRUE
22	37421469	-0.118383	0.0241355	7.3872e-07	14306	ebi-a-GCST90016943	rs6000536	C	T	NA	Gut microbiota abundance (family Oxalobacteraceae id.2966)	TRUE
1	241789757	-0.11504	0.0260137	8.74138e-06	14306	ebi-a-GCST90017062	rs3819978	C	T	NA	Gut microbiota abundance (genus Ruminococcus1 id.11373)	TRUE
1	12778598	0.0709997	0.0162766	9.27662e-06	14306	ebi-a-GCST90017062	rs3000856	A	T	NA	Gut microbiota abundance (genus Ruminococcus1 id.11373)	TRUE
2	10533921	0.0527654	0.0112619	2.55611e-06	14306	ebi-a-GCST90017062	rs7583465	C	T	NA	Gut microbiota abundance (genus Ruminococcus1 id.11373)	TRUE
2	181882879	0.0519509	0.0116306	8.09245e-06	14306	ebi-a-GCST90017062	rs10167839	A	G	NA	Gut microbiota abundance (genus Ruminococcus1 id.11373)	TRUE
2	119481372	0.132764	0.0299816	8.82612e-06	14306	ebi-a-GCST90017062	rs4849717	T	A	NA	Gut microbiota abundance (genus Ruminococcus1 id.11373)	TRUE
2	65925212	0.167497	0.0367639	5.11423e-06	14306	ebi-a-GCST90017062	rs78613526	G	A	NA	Gut microbiota abundance (genus Ruminococcus1 id.11373)	TRUE
5	15944587	0.125038	0.0279411	5.23106e-06	14306	ebi-a-GCST90017062	rs78572139	G	A	NA	Gut microbiota abundance (genus Ruminococcus1 id.11373)	TRUE
8	144596903	-0.0734114	0.0161398	4.72683e-06	14306	ebi-a-GCST90017062	rs11783695	G	T	NA	Gut microbiota abundance (genus Ruminococcus1 id.11373)	TRUE
10	65870347	-0.0762002	0.0174689	8.38262e-06	14306	ebi-a-GCST90017062	rs10995816	C	G	NA	Gut microbiota abundance (genus Ruminococcus1 id.11373)	TRUE
11	45688595	0.0640277	0.0110059	5.29127e-09	14306	ebi-a-GCST90017062	rs10769159	C	G	NA	Gut microbiota abundance (genus Ruminococcus1 id.11373)	TRUE
11	114023573	0.0829505	0.0170891	6.47978e-07	14306	ebi-a-GCST90017062	rs7117576	A	G	NA	Gut microbiota abundance (genus Ruminococcus1 id.11373)	TRUE
15	55439182	-0.0535262	0.0115885	3.38361e-06	14306	ebi-a-GCST90017062	rs6493760	T	C	NA	Gut microbiota abundance (genus Ruminococcus1 id.11373)	TRUE
17	71256018	0.0999271	0.0211728	1.96336e-06	14306	ebi-a-GCST90017062	rs17781867	C	T	NA	Gut microbiota abundance (genus Ruminococcus1 id.11373)	TRUE
20	13258628	-0.0607052	0.013425	5.05918e-06	14306	ebi-a-GCST90017062	rs6105066	T	C	NA	Gut microbiota abundance (genus Ruminococcus1 id.11373)	TRUE
1	108074445	-0.063193	0.0142275	9.78949e-06	14306	ebi-a-GCST90017063	rs12406309	A	C	NA	Gut microbiota abundance (genus Ruminococcus2 id.11374)	TRUE
2	182656416	0.199648	0.0438453	3.62928e-06	14306	ebi-a-GCST90017063	rs2368224	T	G	NA	Gut microbiota abundance (genus Ruminococcus2 id.11374)	TRUE
2	238103439	-0.0665937	0.0140168	2.142e-06	14306	ebi-a-GCST90017063	rs12986628	T	C	NA	Gut microbiota abundance (genus Ruminococcus2 id.11374)	TRUE
3	173040924	0.0618344	0.0129031	1.98052e-06	14306	ebi-a-GCST90017063	rs7635831	G	A	NA	Gut microbiota abundance (genus Ruminococcus2 id.11374)	TRUE
3	106664363	-0.192815	0.0392045	3.31184e-07	14306	ebi-a-GCST90017063	rs78120384	A	G	NA	Gut microbiota abundance (genus Ruminococcus2 id.11374)	TRUE
4	24655463	-0.0523503	0.0117119	6.78938e-06	14306	ebi-a-GCST90017063	rs61791565	T	C	NA	Gut microbiota abundance (genus Ruminococcus2 id.11374)	TRUE
4	4268322	-0.102822	0.0235087	9.42128e-06	14306	ebi-a-GCST90017063	rs7693984	G	A	NA	Gut microbiota abundance (genus Ruminococcus2 id.11374)	TRUE
7	16804578	0.0546114	0.0120077	5.79923e-06	14306	ebi-a-GCST90017063	rs4400279	A	G	NA	Gut microbiota abundance (genus Ruminococcus2 id.11374)	TRUE
7	151435722	0.0842356	0.0184893	5.28433e-06	14306	ebi-a-GCST90017063	rs1819812	G	T	NA	Gut microbiota abundance (genus Ruminococcus2 id.11374)	TRUE
9	79919385	0.0865522	0.0189141	8.0059e-06	14306	ebi-a-GCST90017063	rs55707116	C	A	NA	Gut microbiota abundance (genus Ruminococcus2 id.11374)	TRUE
9	137557890	0.0723875	0.0160787	4.18177e-06	14306	ebi-a-GCST90017063	rs58681734	A	G	NA	Gut microbiota abundance (genus Ruminococcus2 id.11374)	TRUE
11	12148588	0.0836825	0.0176445	3.95294e-06	14306	ebi-a-GCST90017063	rs75140805	T	G	NA	Gut microbiota abundance (genus Ruminococcus2 id.11374)	TRUE
13	62067781	0.0568439	0.0122325	4.22114e-06	14306	ebi-a-GCST90017063	rs2997412	G	A	NA	Gut microbiota abundance (genus Ruminococcus2 id.11374)	TRUE
18	33456427	0.0837001	0.0182263	5.40132e-06	14306	ebi-a-GCST90017063	rs4799823	C	T	NA	Gut microbiota abundance (genus Ruminococcus2 id.11374)	TRUE
18	862477	-0.0522093	0.0116382	7.58892e-06	14306	ebi-a-GCST90017063	rs2846589	T	G	NA	Gut microbiota abundance (genus Ruminococcus2 id.11374)	TRUE
1	3041519	0.0563367	0.012392	5.27024e-06	14306	ebi-a-GCST90016931	rs2817172	C	T	NA	Gut microbiota abundance (family Clostridiaceae1 id.1869)	TRUE
1	101804809	0.0536759	0.0119436	8.09823e-06	14306	ebi-a-GCST90016931	rs10875374	T	C	NA	Gut microbiota abundance (family Clostridiaceae1 id.1869)	TRUE
3	132596627	0.0748236	0.016246	5.33962e-06	14306	ebi-a-GCST90016931	rs12186080	G	A	NA	Gut microbiota abundance (family Clostridiaceae1 id.1869)	TRUE
3	111482845	-0.0616944	0.013693	6.9051e-06	14306	ebi-a-GCST90016931	rs12490337	C	G	NA	Gut microbiota abundance (family Clostridiaceae1 id.1869)	TRUE
6	48093014	0.0615805	0.0136198	9.07716e-06	14306	ebi-a-GCST90016931	rs62397761	A	G	NA	Gut microbiota abundance (family Clostridiaceae1 id.1869)	TRUE
6	165722832	-0.0734787	0.0168383	7.0912e-06	14306	ebi-a-GCST90016931	rs550843	T	C	NA	Gut microbiota abundance (family Clostridiaceae1 id.1869)	TRUE
7	30934659	-0.106376	0.0241944	7.42147e-06	14306	ebi-a-GCST90016931	rs4723021	T	C	NA	Gut microbiota abundance (family Clostridiaceae1 id.1869)	TRUE
9	136710881	0.0814503	0.0179338	4.54485e-06	14306	ebi-a-GCST90016931	rs12341505	G	A	NA	Gut microbiota abundance (family Clostridiaceae1 id.1869)	TRUE
10	43270264	-0.180969	0.0390911	3.80627e-06	14306	ebi-a-GCST90016931	rs2795528	G	A	NA	Gut microbiota abundance (family Clostridiaceae1 id.1869)	TRUE
16	87710690	0.0967773	0.0217471	8.24442e-06	14306	ebi-a-GCST90016931	rs56188186	A	G	NA	Gut microbiota abundance (family Clostridiaceae1 id.1869)	TRUE
22	47806774	0.0533035	0.0119011	7.8966e-06	14306	ebi-a-GCST90016931	rs881532	G	A	NA	Gut microbiota abundance (family Clostridiaceae1 id.1869)	TRUE
2	60484909	-0.197786	0.0410495	5.97008e-07	14306	ebi-a-GCST90016958	rs6545794	A	G	NA	Gut microbiota abundance (family Victivallaceae id.2255)	TRUE
2	2649472	-0.123489	0.0266695	3.23802e-06	14306	ebi-a-GCST90016958	rs67832247	C	T	NA	Gut microbiota abundance (family Victivallaceae id.2255)	TRUE
2	31211657	0.145501	0.0300007	3.07921e-06	14306	ebi-a-GCST90016958	rs61702987	T	C	NA	Gut microbiota abundance (family Victivallaceae id.2255)	TRUE
3	9968555	-0.134158	0.0301427	8.19426e-06	14306	ebi-a-GCST90016958	rs7627405	C	T	NA	Gut microbiota abundance (family Victivallaceae id.2255)	TRUE
5	94692439	-0.126643	0.0257111	1.02501e-06	14306	ebi-a-GCST90016958	rs2546105	T	A	NA	Gut microbiota abundance (family Victivallaceae id.2255)	TRUE
7	146808977	0.127099	0.025656	7.4929e-07	14306	ebi-a-GCST90016958	rs11764871	G	T	NA	Gut microbiota abundance (family Victivallaceae id.2255)	TRUE
7	57589803	-0.124197	0.0257026	1.56603e-06	14306	ebi-a-GCST90016958	rs2944282	T	C	NA	Gut microbiota abundance (family Victivallaceae id.2255)	TRUE
9	94128796	0.164855	0.0375128	9.60086e-06	14306	ebi-a-GCST90016958	rs7860510	G	C	NA	Gut microbiota abundance (family Victivallaceae id.2255)	TRUE
9	111086170	-0.246101	0.0483077	2.69855e-07	14306	ebi-a-GCST90016958	rs62570196	C	T	NA	Gut microbiota abundance (family Victivallaceae id.2255)	TRUE
10	95286954	0.148942	0.0318366	2.83374e-06	14306	ebi-a-GCST90016958	rs7077363	G	A	NA	Gut microbiota abundance (family Victivallaceae id.2255)	TRUE
11	9316730	-0.152918	0.0288525	1.53784e-07	14306	ebi-a-GCST90016958	rs4396289	C	T	NA	Gut microbiota abundance (family Victivallaceae id.2255)	TRUE
12	102525047	0.101088	0.0225594	6.40088e-06	14306	ebi-a-GCST90016958	rs7314815	G	A	NA	Gut microbiota abundance (family Victivallaceae id.2255)	TRUE
12	131103256	-0.186945	0.0418412	6.24827e-06	14306	ebi-a-GCST90016958	rs34962571	A	C	NA	Gut microbiota abundance (family Victivallaceae id.2255)	TRUE
19	711637	-0.160034	0.0349472	4.08037e-06	14306	ebi-a-GCST90016958	rs11671100	A	C	NA	Gut microbiota abundance (family Victivallaceae id.2255)	TRUE
1	68664315	-0.127185	0.0281887	6.54757e-06	14306	ebi-a-GCST90016987	rs12031543	T	C	NA	Gut microbiota abundance (genus Desulfovibrio id.3173)	TRUE
2	198089911	0.109402	0.0226964	1.79449e-06	14306	ebi-a-GCST90016987	rs16863365	A	G	NA	Gut microbiota abundance (genus Desulfovibrio id.3173)	TRUE
3	67478973	0.119141	0.0250891	3.78669e-06	14306	ebi-a-GCST90016987	rs13066142	G	A	NA	Gut microbiota abundance (genus Desulfovibrio id.3173)	TRUE
5	52633741	0.0854927	0.0172749	8.5487e-07	14306	ebi-a-GCST90016987	rs2456226	A	C	NA	Gut microbiota abundance (genus Desulfovibrio id.3173)	TRUE
5	139410687	0.0770979	0.0169735	4.93856e-06	14306	ebi-a-GCST90016987	rs6580353	T	C	NA	Gut microbiota abundance (genus Desulfovibrio id.3173)	TRUE
8	105462047	-0.0811971	0.0174234	2.42438e-06	14306	ebi-a-GCST90016987	rs2853179	T	C	NA	Gut microbiota abundance (genus Desulfovibrio id.3173)	TRUE
8	57972916	-0.106594	0.0239337	8.29755e-06	14306	ebi-a-GCST90016987	rs72647089	T	G	NA	Gut microbiota abundance (genus Desulfovibrio id.3173)	TRUE
10	130170270	0.0654931	0.0148681	9.14282e-06	14306	ebi-a-GCST90016987	rs2032031	G	A	NA	Gut microbiota abundance (genus Desulfovibrio id.3173)	TRUE
13	64264446	-0.154496	0.0339396	6.65426e-06	14306	ebi-a-GCST90016987	rs2590913	A	G	NA	Gut microbiota abundance (genus Desulfovibrio id.3173)	TRUE
14	97116904	0.0691756	0.0147285	2.70302e-06	14306	ebi-a-GCST90016987	rs11160353	A	T	NA	Gut microbiota abundance (genus Desulfovibrio id.3173)	TRUE
18	13447995	-0.212582	0.0470044	5.64313e-06	14306	ebi-a-GCST90016987	rs4797774	A	G	NA	Gut microbiota abundance (genus Desulfovibrio id.3173)	TRUE
1	247145690	-0.10309	0.0212861	1.48659e-06	14306	ebi-a-GCST90016965	rs4506496	A	G	NA	Gut microbiota abundance (genus Anaerofilum id.2053)	TRUE
2	76698142	0.0903417	0.0200239	7.24169e-06	14306	ebi-a-GCST90016965	rs17012738	T	G	NA	Gut microbiota abundance (genus Anaerofilum id.2053)	TRUE
2	191139151	0.182586	0.0357284	3.74731e-07	14306	ebi-a-GCST90016965	rs79598899	C	T	NA	Gut microbiota abundance (genus Anaerofilum id.2053)	TRUE
2	3838940	0.0923834	0.0202157	5.53847e-06	14306	ebi-a-GCST90016965	rs1563175	A	C	NA	Gut microbiota abundance (genus Anaerofilum id.2053)	TRUE
3	129686434	0.10076	0.0202902	6.83109e-07	14306	ebi-a-GCST90016965	rs712981	A	C	NA	Gut microbiota abundance (genus Anaerofilum id.2053)	TRUE
9	104339812	-0.1364	0.0302372	8.04304e-06	14306	ebi-a-GCST90016965	rs9299345	T	C	NA	Gut microbiota abundance (genus Anaerofilum id.2053)	TRUE
10	125294406	-0.193107	0.0411187	1.56819e-06	14306	ebi-a-GCST90016965	rs17105491	G	C	NA	Gut microbiota abundance (genus Anaerofilum id.2053)	TRUE
11	1051715	0.0953524	0.02006	2.23496e-06	14306	ebi-a-GCST90016965	rs10794359	C	T	NA	Gut microbiota abundance (genus Anaerofilum id.2053)	TRUE
12	67167461	0.146775	0.0326594	9.81206e-06	14306	ebi-a-GCST90016965	rs4244069	A	G	NA	Gut microbiota abundance (genus Anaerofilum id.2053)	TRUE
12	117811409	-0.113003	0.02204	2.6404e-07	14306	ebi-a-GCST90016965	rs816292	T	C	NA	Gut microbiota abundance (genus Anaerofilum id.2053)	TRUE
14	30991358	-0.126337	0.0268919	2.86029e-06	14306	ebi-a-GCST90016965	rs17096874	C	T	NA	Gut microbiota abundance (genus Anaerofilum id.2053)	TRUE
17	6450532	0.132603	0.0289802	6.55843e-06	14306	ebi-a-GCST90016965	rs356049	G	A	NA	Gut microbiota abundance (genus Anaerofilum id.2053)	TRUE
2	49906864	0.0577763	0.0117388	8.88055e-07	14306	ebi-a-GCST90017093	rs4567981	T	A	NA	Gut microbiota abundance (order Bifidobacteriales id.432)	TRUE
2	137603404	0.0637133	0.0144305	8.79792e-06	14306	ebi-a-GCST90017093	rs10496759	G	C	NA	Gut microbiota abundance (order Bifidobacteriales id.432)	TRUE
2	136616754	-0.11707	0.0126703	5.94155e-20	14306	ebi-a-GCST90017093	rs182549	T	C	NA	Gut microbiota abundance (order Bifidobacteriales id.432)	TRUE
2	192878532	0.0584045	0.0122081	1.57373e-06	14306	ebi-a-GCST90017093	rs13020688	G	A	NA	Gut microbiota abundance (order Bifidobacteriales id.432)	TRUE
4	1517826	0.053673	0.0120586	8.66204e-06	14306	ebi-a-GCST90017093	rs55888705	A	G	NA	Gut microbiota abundance (order Bifidobacteriales id.432)	TRUE
4	161211924	0.0562	0.0126395	7.24136e-06	14306	ebi-a-GCST90017093	rs10857328	T	A	NA	Gut microbiota abundance (order Bifidobacteriales id.432)	TRUE
5	142793467	-0.0942612	0.0208421	4.84953e-06	14306	ebi-a-GCST90017093	rs73797465	T	G	NA	Gut microbiota abundance (order Bifidobacteriales id.432)	TRUE
5	521096	0.0569873	0.0116907	1.1517e-06	14306	ebi-a-GCST90017093	rs4957061	T	C	NA	Gut microbiota abundance (order Bifidobacteriales id.432)	TRUE
5	169748189	-0.0892981	0.0183177	1.03631e-06	14306	ebi-a-GCST90017093	rs76671854	C	G	NA	Gut microbiota abundance (order Bifidobacteriales id.432)	TRUE
6	14617591	0.0553965	0.0120669	3.8249e-06	14306	ebi-a-GCST90017093	rs857444	C	T	NA	Gut microbiota abundance (order Bifidobacteriales id.432)	TRUE
6	97406220	-0.0914312	0.0202604	7.27998e-06	14306	ebi-a-GCST90017093	rs6899771	A	G	NA	Gut microbiota abundance (order Bifidobacteriales id.432)	TRUE
11	13098051	0.0537537	0.0123746	9.94741e-06	14306	ebi-a-GCST90017093	rs10831953	G	A	NA	Gut microbiota abundance (order Bifidobacteriales id.432)	TRUE
12	20378911	-0.0613031	0.0128844	2.28066e-06	14306	ebi-a-GCST90017093	rs10841473	G	C	NA	Gut microbiota abundance (order Bifidobacteriales id.432)	TRUE
13	112859829	0.110676	0.0200996	1.74032e-08	14306	ebi-a-GCST90017093	rs7322849	T	C	NA	Gut microbiota abundance (order Bifidobacteriales id.432)	TRUE
15	92463303	-0.0551726	0.0124655	6.86784e-06	14306	ebi-a-GCST90017093	rs7174549	T	C	NA	Gut microbiota abundance (order Bifidobacteriales id.432)	TRUE
16	898055	0.0810099	0.019073	8.52884e-06	14306	ebi-a-GCST90017093	rs12446429	T	C	NA	Gut microbiota abundance (order Bifidobacteriales id.432)	TRUE
17	72897722	-0.0632518	0.013817	5.36809e-06	14306	ebi-a-GCST90017093	rs540489	T	G	NA	Gut microbiota abundance (order Bifidobacteriales id.432)	TRUE
18	4304187	-0.0728589	0.0164821	6.00109e-06	14306	ebi-a-GCST90017093	rs677208	C	G	NA	Gut microbiota abundance (order Bifidobacteriales id.432)	TRUE
4	40707798	0.05695	0.0126502	6.8019e-06	14306	ebi-a-GCST90017058	rs7441445	T	C	NA	Gut microbiota abundance (genus Ruminococcaceae UCG010 id.11367)	TRUE
4	31057482	-0.166211	0.0367938	6.43028e-06	14306	ebi-a-GCST90017058	rs73218807	G	A	NA	Gut microbiota abundance (genus Ruminococcaceae UCG010 id.11367)	TRUE
6	104728618	0.0592304	0.0125917	2.85384e-06	14306	ebi-a-GCST90017058	rs2820282	C	A	NA	Gut microbiota abundance (genus Ruminococcaceae UCG010 id.11367)	TRUE
7	16349864	-0.0585718	0.0124994	2.84165e-06	14306	ebi-a-GCST90017058	rs6958419	C	T	NA	Gut microbiota abundance (genus Ruminococcaceae UCG010 id.11367)	TRUE
9	135968557	-0.0588161	0.0124671	2.36537e-06	14306	ebi-a-GCST90017058	rs682403	A	G	NA	Gut microbiota abundance (genus Ruminococcaceae UCG010 id.11367)	TRUE
11	130676996	0.0631351	0.0137953	4.99425e-06	14306	ebi-a-GCST90017058	rs7935775	T	A	NA	Gut microbiota abundance (genus Ruminococcaceae UCG010 id.11367)	TRUE
15	36607072	-0.0693743	0.0147926	3.20915e-06	14306	ebi-a-GCST90017058	rs35506912	G	C	NA	Gut microbiota abundance (genus Ruminococcaceae UCG010 id.11367)	TRUE
16	5233941	-0.0670855	0.0144415	4.87304e-06	14306	ebi-a-GCST90017058	rs12597105	A	G	NA	Gut microbiota abundance (genus Ruminococcaceae UCG010 id.11367)	TRUE
2	116724915	0.0888472	0.0179655	9.54201e-06	14306	ebi-a-GCST90016913	rs13421739	C	G	NA	Gut microbiota abundance (class Clostridia id.1859)	TRUE
2	231676041	0.0794173	0.0182427	9.8935e-06	14306	ebi-a-GCST90016913	rs10209007	G	C	NA	Gut microbiota abundance (class Clostridia id.1859)	TRUE
3	131371980	0.0698882	0.0156319	8.39808e-06	14306	ebi-a-GCST90016913	rs76767978	G	A	NA	Gut microbiota abundance (class Clostridia id.1859)	TRUE
3	89268714	-0.0592279	0.0134556	9.35643e-06	14306	ebi-a-GCST90016913	rs6797343	T	G	NA	Gut microbiota abundance (class Clostridia id.1859)	TRUE
4	7420184	0.0529097	0.011818	8.77789e-06	14306	ebi-a-GCST90016913	rs13105690	C	T	NA	Gut microbiota abundance (class Clostridia id.1859)	TRUE
4	161507301	-0.0739995	0.0150815	9.65095e-07	14306	ebi-a-GCST90016913	rs6814436	C	T	NA	Gut microbiota abundance (class Clostridia id.1859)	TRUE
4	152131744	-0.103803	0.0210883	4.01856e-07	14306	ebi-a-GCST90016913	rs6815608	C	T	NA	Gut microbiota abundance (class Clostridia id.1859)	TRUE
5	105060362	-0.0547202	0.0127338	8.72027e-06	14306	ebi-a-GCST90016913	rs1842454	G	A	NA	Gut microbiota abundance (class Clostridia id.1859)	TRUE
5	149077788	-0.0511937	0.0109569	3.37085e-06	14306	ebi-a-GCST90016913	rs13179700	C	T	NA	Gut microbiota abundance (class Clostridia id.1859)	TRUE
5	35770550	0.0866169	0.0190393	8.24233e-06	14306	ebi-a-GCST90016913	rs72738886	T	C	NA	Gut microbiota abundance (class Clostridia id.1859)	TRUE
6	12397187	0.0947036	0.0225117	7.53165e-06	14306	ebi-a-GCST90016913	rs76860606	C	G	NA	Gut microbiota abundance (class Clostridia id.1859)	TRUE
6	163743050	0.0524406	0.0116115	6.53085e-06	14306	ebi-a-GCST90016913	rs6934062	G	C	NA	Gut microbiota abundance (class Clostridia id.1859)	TRUE
12	5942519	-0.052659	0.0113858	3.24399e-06	14306	ebi-a-GCST90016913	rs10774377	G	A	NA	Gut microbiota abundance (class Clostridia id.1859)	TRUE
14	52494072	-0.0724037	0.0153105	4.52137e-06	14306	ebi-a-GCST90016913	rs2273429	A	G	NA	Gut microbiota abundance (class Clostridia id.1859)	TRUE
18	48792829	-0.0581025	0.0120557	1.34295e-06	14306	ebi-a-GCST90016913	rs72915163	T	C	NA	Gut microbiota abundance (class Clostridia id.1859)	TRUE
20	50803760	-0.0963981	0.0212007	9.04045e-06	14306	ebi-a-GCST90016913	rs7269302	A	T	NA	Gut microbiota abundance (class Clostridia id.1859)	TRUE
21	18567802	-0.255639	0.0508787	8.77506e-07	14306	ebi-a-GCST90016913	rs992074	T	C	NA	Gut microbiota abundance (class Clostridia id.1859)	TRUE
21	40703251	0.0641008	0.0127404	3.81408e-07	14306	ebi-a-GCST90016913	rs112334273	G	A	NA	Gut microbiota abundance (class Clostridia id.1859)	TRUE
1	69444163	-0.0953084	0.0210752	5.2342e-06	14306	ebi-a-GCST90016960	rs6664405	T	C	NA	Gut microbiota abundance (genus Adlercreutzia id.812)	TRUE
1	201061818	-0.0922959	0.0192121	1.39878e-06	14306	ebi-a-GCST90016960	rs2147798	G	C	NA	Gut microbiota abundance (genus Adlercreutzia id.812)	TRUE
3	105355971	-0.0699243	0.0158036	9.60506e-06	14306	ebi-a-GCST90016960	rs55719207	G	A	NA	Gut microbiota abundance (genus Adlercreutzia id.812)	TRUE
4	171281359	0.083381	0.0168901	9.769e-07	14306	ebi-a-GCST90016960	rs7680684	T	C	NA	Gut microbiota abundance (genus Adlercreutzia id.812)	TRUE
5	94059857	-0.11324	0.0232586	1.57358e-06	14306	ebi-a-GCST90016960	rs80078995	A	T	NA	Gut microbiota abundance (genus Adlercreutzia id.812)	TRUE
5	31991834	-0.104884	0.0234695	4.41255e-06	14306	ebi-a-GCST90016960	rs12522517	A	T	NA	Gut microbiota abundance (genus Adlercreutzia id.812)	TRUE
6	123909083	-0.0734512	0.0155789	2.54419e-06	14306	ebi-a-GCST90016960	rs9490822	C	T	NA	Gut microbiota abundance (genus Adlercreutzia id.812)	TRUE
7	48844151	0.143237	0.0311654	4.8136e-06	14306	ebi-a-GCST90016960	rs13231526	C	A	NA	Gut microbiota abundance (genus Adlercreutzia id.812)	TRUE
10	135204950	-0.112758	0.0255994	6.35887e-06	14306	ebi-a-GCST90016960	rs1046175	G	C	NA	Gut microbiota abundance (genus Adlercreutzia id.812)	TRUE
11	98386085	-0.102524	0.0234834	9.74473e-06	14306	ebi-a-GCST90016960	rs11604400	C	T	NA	Gut microbiota abundance (genus Adlercreutzia id.812)	TRUE
17	48864179	-0.0749219	0.016833	8.21675e-06	14306	ebi-a-GCST90016960	rs9915817	C	T	NA	Gut microbiota abundance (genus Adlercreutzia id.812)	TRUE
18	75009770	-0.119225	0.0251081	2.04593e-06	14306	ebi-a-GCST90016960	rs2717140	C	T	NA	Gut microbiota abundance (genus Adlercreutzia id.812)	TRUE
1	118425334	-0.0553339	0.0120621	4.90671e-06	14306	ebi-a-GCST90017021	rs9919338	G	C	NA	Gut microbiota abundance (genus Lachnospiraceae FCS020 group id.11314)	TRUE
1	35328576	0.106101	0.0222904	2.15432e-06	14306	ebi-a-GCST90017021	rs12078956	C	G	NA	Gut microbiota abundance (genus Lachnospiraceae FCS020 group id.11314)	TRUE
2	53946431	-0.116881	0.0246589	1.63422e-06	14306	ebi-a-GCST90017021	rs72793667	A	G	NA	Gut microbiota abundance (genus Lachnospiraceae FCS020 group id.11314)	TRUE
3	165996415	-0.0564927	0.0121736	3.91913e-06	14306	ebi-a-GCST90017021	rs2862811	C	T	NA	Gut microbiota abundance (genus Lachnospiraceae FCS020 group id.11314)	TRUE
4	165786478	-0.055381	0.0123659	7.47291e-06	14306	ebi-a-GCST90017021	rs9308097	G	A	NA	Gut microbiota abundance (genus Lachnospiraceae FCS020 group id.11314)	TRUE
4	166588085	-0.0666305	0.0141577	5.20811e-06	14306	ebi-a-GCST90017021	rs2322265	C	T	NA	Gut microbiota abundance (genus Lachnospiraceae FCS020 group id.11314)	TRUE
5	109403564	-0.108906	0.0242055	2.55452e-06	14306	ebi-a-GCST90017021	rs113859143	G	C	NA	Gut microbiota abundance (genus Lachnospiraceae FCS020 group id.11314)	TRUE
6	71966268	0.0604208	0.0135965	8.98194e-06	14306	ebi-a-GCST90017021	rs4452603	T	G	NA	Gut microbiota abundance (genus Lachnospiraceae FCS020 group id.11314)	TRUE
8	121244406	-0.0568869	0.0121152	3.05626e-06	14306	ebi-a-GCST90017021	rs10093861	G	A	NA	Gut microbiota abundance (genus Lachnospiraceae FCS020 group id.11314)	TRUE
10	65563647	-0.0550587	0.0121847	6.55043e-06	14306	ebi-a-GCST90017021	rs3999074	G	T	NA	Gut microbiota abundance (genus Lachnospiraceae FCS020 group id.11314)	TRUE
10	44346094	-0.105963	0.0232501	5.59667e-06	14306	ebi-a-GCST90017021	rs1254846	A	G	NA	Gut microbiota abundance (genus Lachnospiraceae FCS020 group id.11314)	TRUE
11	3248876	-0.190615	0.0414403	2.62029e-06	14306	ebi-a-GCST90017021	rs35035870	T	C	NA	Gut microbiota abundance (genus Lachnospiraceae FCS020 group id.11314)	TRUE
13	40419314	-0.062804	0.0130744	1.38618e-06	14306	ebi-a-GCST90017021	rs9788306	C	T	NA	Gut microbiota abundance (genus Lachnospiraceae FCS020 group id.11314)	TRUE
16	23631307	0.125481	0.0259008	3.14826e-06	14306	ebi-a-GCST90017021	rs369444	C	G	NA	Gut microbiota abundance (genus Lachnospiraceae FCS020 group id.11314)	TRUE
19	17865305	0.200628	0.0449372	1.58161e-06	14306	ebi-a-GCST90017021	rs1363769	C	T	NA	Gut microbiota abundance (genus Lachnospiraceae FCS020 group id.11314)	TRUE
19	2571232	0.0679483	0.0133496	3.721e-07	14306	ebi-a-GCST90017021	rs7249113	G	A	NA	Gut microbiota abundance (genus Lachnospiraceae FCS020 group id.11314)	TRUE
1	90818872	-0.117029	0.0243085	1.4003e-06	14306	ebi-a-GCST90017027	rs10801803	G	A	NA	Gut microbiota abundance (genus Lachnospiraceae UCG008 id.11328)	TRUE
2	228100140	0.102292	0.0212319	1.58891e-06	14306	ebi-a-GCST90017027	rs62277846	C	T	NA	Gut microbiota abundance (genus Lachnospiraceae UCG008 id.11328)	TRUE
2	168628871	-0.0798769	0.0168846	2.29166e-06	14306	ebi-a-GCST90017027	rs13024781	T	C	NA	Gut microbiota abundance (genus Lachnospiraceae UCG008 id.11328)	TRUE
3	100496680	-0.121162	0.0233467	2.4134e-07	14306	ebi-a-GCST90017027	rs9873555	G	C	NA	Gut microbiota abundance (genus Lachnospiraceae UCG008 id.11328)	TRUE
4	114220647	-0.0845848	0.0170693	7.68192e-07	14306	ebi-a-GCST90017027	rs67078837	T	C	NA	Gut microbiota abundance (genus Lachnospiraceae UCG008 id.11328)	TRUE
6	81214803	-0.110443	0.0235801	2.85825e-06	14306	ebi-a-GCST90017027	rs57091572	A	G	NA	Gut microbiota abundance (genus Lachnospiraceae UCG008 id.11328)	TRUE
8	23071054	0.0886512	0.0199045	6.92054e-06	14306	ebi-a-GCST90017027	rs57254474	G	A	NA	Gut microbiota abundance (genus Lachnospiraceae UCG008 id.11328)	TRUE
11	74391775	-0.0974344	0.0181279	9.34932e-08	14306	ebi-a-GCST90017027	rs10793103	T	C	NA	Gut microbiota abundance (genus Lachnospiraceae UCG008 id.11328)	TRUE
11	19572557	-0.0973842	0.0194791	7.68652e-07	14306	ebi-a-GCST90017027	rs10741777	T	C	NA	Gut microbiota abundance (genus Lachnospiraceae UCG008 id.11328)	TRUE
12	129539818	0.179838	0.0393797	6.34118e-06	14306	ebi-a-GCST90017027	rs61944774	A	G	NA	Gut microbiota abundance (genus Lachnospiraceae UCG008 id.11328)	TRUE
15	31697284	0.136523	0.0303128	9.83196e-06	14306	ebi-a-GCST90017027	rs75356640	G	A	NA	Gut microbiota abundance (genus Lachnospiraceae UCG008 id.11328)	TRUE
16	84992314	0.112064	0.0228369	1.80992e-06	14306	ebi-a-GCST90017027	rs955844	A	C	NA	Gut microbiota abundance (genus Lachnospiraceae UCG008 id.11328)	TRUE
1	230523039	-0.0896103	0.0186432	1.27488e-06	14306	ebi-a-GCST90016919	rs16851659	G	C	NA	Gut microbiota abundance (class Melainabacteria id.1589)	TRUE
3	14306949	-0.159735	0.0292553	5.36056e-08	14306	ebi-a-GCST90016919	rs9864379	T	C	NA	Gut microbiota abundance (class Melainabacteria id.1589)	TRUE
7	20010624	0.166216	0.0355728	2.86609e-06	14306	ebi-a-GCST90016919	rs73074665	A	T	NA	Gut microbiota abundance (class Melainabacteria id.1589)	TRUE
9	122046549	-0.123968	0.0278958	7.10739e-06	14306	ebi-a-GCST90016919	rs1221147	A	T	NA	Gut microbiota abundance (class Melainabacteria id.1589)	TRUE
9	115975389	0.0896187	0.0185106	1.48057e-06	14306	ebi-a-GCST90016919	rs4129395	G	A	NA	Gut microbiota abundance (class Melainabacteria id.1589)	TRUE
9	26184578	-0.0814624	0.0184409	9.95795e-06	14306	ebi-a-GCST90016919	rs10738747	A	G	NA	Gut microbiota abundance (class Melainabacteria id.1589)	TRUE
9	24648997	-0.205352	0.0454982	8.05675e-06	14306	ebi-a-GCST90016919	rs113884518	T	C	NA	Gut microbiota abundance (class Melainabacteria id.1589)	TRUE
11	2937631	0.083758	0.0185796	8.19917e-06	14306	ebi-a-GCST90016919	rs367480	A	G	NA	Gut microbiota abundance (class Melainabacteria id.1589)	TRUE
14	107061448	-0.0861928	0.0193381	8.67142e-06	14306	ebi-a-GCST90016919	rs10148250	A	G	NA	Gut microbiota abundance (class Melainabacteria id.1589)	TRUE
15	100747683	0.226722	0.0487841	3.29011e-06	14306	ebi-a-GCST90016919	rs79790072	T	C	NA	Gut microbiota abundance (class Melainabacteria id.1589)	TRUE
16	80493705	0.0989487	0.0196972	6.02893e-07	14306	ebi-a-GCST90016919	rs11150282	T	C	NA	Gut microbiota abundance (class Melainabacteria id.1589)	TRUE
17	53906328	0.214848	0.0470878	6.69083e-06	14306	ebi-a-GCST90016919	rs28678345	T	C	NA	Gut microbiota abundance (class Melainabacteria id.1589)	TRUE
18	1008278	-0.103539	0.0234287	6.84636e-06	14306	ebi-a-GCST90016919	rs789069	A	C	NA	Gut microbiota abundance (class Melainabacteria id.1589)	TRUE
2	195739311	0.0930178	0.0202658	1.71581e-06	14306	ebi-a-GCST90016981	rs73052258	G	A	NA	Gut microbiota abundance (genus Collinsella id.815)	TRUE
4	149818294	-0.108908	0.0240522	6.1355e-06	14306	ebi-a-GCST90016981	rs75672793	A	G	NA	Gut microbiota abundance (genus Collinsella id.815)	TRUE
7	24465024	-0.0540309	0.0120324	6.7825e-06	14306	ebi-a-GCST90016981	rs62448871	C	A	NA	Gut microbiota abundance (genus Collinsella id.815)	TRUE
10	8589813	-0.0537947	0.0120548	9.37605e-06	14306	ebi-a-GCST90016981	rs11597285	G	T	NA	Gut microbiota abundance (genus Collinsella id.815)	TRUE
11	107123199	0.0537401	0.0118848	6.52139e-06	14306	ebi-a-GCST90016981	rs10890671	C	T	NA	Gut microbiota abundance (genus Collinsella id.815)	TRUE
13	68610061	0.09597	0.0197312	8.79427e-07	14306	ebi-a-GCST90016981	rs9541268	C	A	NA	Gut microbiota abundance (genus Collinsella id.815)	TRUE
15	50026113	0.0668866	0.0149773	9.14724e-06	14306	ebi-a-GCST90016981	rs59414781	C	G	NA	Gut microbiota abundance (genus Collinsella id.815)	TRUE
16	77283458	-0.0563759	0.0127019	8.22565e-06	14306	ebi-a-GCST90016981	rs12921100	T	A	NA	Gut microbiota abundance (genus Collinsella id.815)	TRUE
17	47529492	0.0567751	0.011945	2.22039e-06	14306	ebi-a-GCST90016981	rs2671662	G	C	NA	Gut microbiota abundance (genus Collinsella id.815)	TRUE
19	56526640	-0.104264	0.0235841	7.09872e-06	14306	ebi-a-GCST90016981	rs149807560	C	A	NA	Gut microbiota abundance (genus Collinsella id.815)	TRUE
19	31760841	-0.0722307	0.01616	6.78172e-06	14306	ebi-a-GCST90016981	rs1496626	T	C	NA	Gut microbiota abundance (genus Collinsella id.815)	TRUE
21	29355467	0.0786551	0.0168217	2.42477e-06	14306	ebi-a-GCST90016981	rs2103510	G	A	NA	Gut microbiota abundance (genus Collinsella id.815)	TRUE
2	116724915	0.0943944	0.0179641	1.94644e-06	14306	ebi-a-GCST90017114	rs13421739	C	G	NA	Gut microbiota abundance (phylum Firmicutes id.1672)	TRUE
2	231678413	0.0897349	0.0182532	6.75492e-07	14306	ebi-a-GCST90017114	rs3792064	G	A	NA	Gut microbiota abundance (phylum Firmicutes id.1672)	TRUE
2	80141964	0.0698446	0.0153935	8.05156e-06	14306	ebi-a-GCST90017114	rs7573799	G	C	NA	Gut microbiota abundance (phylum Firmicutes id.1672)	TRUE
4	161507301	-0.0680205	0.0150844	6.80456e-06	14306	ebi-a-GCST90017114	rs6814436	C	T	NA	Gut microbiota abundance (phylum Firmicutes id.1672)	TRUE
4	171672038	0.0482656	0.0104823	4.04548e-06	14306	ebi-a-GCST90017114	rs2332027	A	G	NA	Gut microbiota abundance (phylum Firmicutes id.1672)	TRUE
4	152131744	-0.0935765	0.0210869	7.23852e-06	14306	ebi-a-GCST90017114	rs6815608	C	T	NA	Gut microbiota abundance (phylum Firmicutes id.1672)	TRUE
5	98020298	-0.0465802	0.0105075	8.56841e-06	14306	ebi-a-GCST90017114	rs2547978	G	A	NA	Gut microbiota abundance (phylum Firmicutes id.1672)	TRUE
5	35770550	0.0864609	0.0190398	7.67892e-06	14306	ebi-a-GCST90017114	rs72738886	T	C	NA	Gut microbiota abundance (phylum Firmicutes id.1672)	TRUE
9	116840801	-0.0525703	0.0116908	6.80848e-06	14306	ebi-a-GCST90017114	rs12554342	G	C	NA	Gut microbiota abundance (phylum Firmicutes id.1672)	TRUE
9	2801371	-0.186194	0.041051	8.66662e-06	14306	ebi-a-GCST90017114	rs56199908	T	C	NA	Gut microbiota abundance (phylum Firmicutes id.1672)	TRUE
10	39136170	-0.0480708	0.0105429	5.1744e-06	14306	ebi-a-GCST90017114	rs36111799	C	T	NA	Gut microbiota abundance (phylum Firmicutes id.1672)	TRUE
10	15054765	-0.0616007	0.0137936	5.78562e-06	14306	ebi-a-GCST90017114	rs4750583	G	A	NA	Gut microbiota abundance (phylum Firmicutes id.1672)	TRUE
10	13841631	-0.141357	0.0308303	5.12436e-06	14306	ebi-a-GCST90017114	rs72771021	C	T	NA	Gut microbiota abundance (phylum Firmicutes id.1672)	TRUE
12	97374875	0.0512732	0.0109226	2.82481e-06	14306	ebi-a-GCST90017114	rs7975768	C	G	NA	Gut microbiota abundance (phylum Firmicutes id.1672)	TRUE
14	52494072	-0.0702112	0.0153063	9.26232e-06	14306	ebi-a-GCST90017114	rs2273429	A	G	NA	Gut microbiota abundance (phylum Firmicutes id.1672)	TRUE
17	11780026	-0.0536457	0.0106294	4.94721e-07	14306	ebi-a-GCST90017114	rs2009919	C	T	NA	Gut microbiota abundance (phylum Firmicutes id.1672)	TRUE
18	29328305	-0.0647291	0.0146219	8.67261e-06	14306	ebi-a-GCST90017114	rs8085381	A	G	NA	Gut microbiota abundance (phylum Firmicutes id.1672)	TRUE
19	22899585	-0.0713033	0.0157424	4.73097e-06	14306	ebi-a-GCST90017114	rs7247191	T	C	NA	Gut microbiota abundance (phylum Firmicutes id.1672)	TRUE
20	54087963	0.0482086	0.0105	4.52595e-06	14306	ebi-a-GCST90017114	rs3852931	T	C	NA	Gut microbiota abundance (phylum Firmicutes id.1672)	TRUE
21	18567802	-0.233491	0.050901	8.51609e-06	14306	ebi-a-GCST90017114	rs992074	T	C	NA	Gut microbiota abundance (phylum Firmicutes id.1672)	TRUE
21	40703251	0.0627459	0.0127415	9.26446e-07	14306	ebi-a-GCST90017114	rs112334273	G	A	NA	Gut microbiota abundance (phylum Firmicutes id.1672)	TRUE
2	19611953	0.182308	0.0382298	2.1734e-06	14306	ebi-a-GCST90016992	rs114731706	T	G	NA	Gut microbiota abundance (genus Enterorhabdus id.820)	TRUE
2	236439879	0.132988	0.0298306	5.88044e-06	14306	ebi-a-GCST90016992	rs77655283	G	A	NA	Gut microbiota abundance (genus Enterorhabdus id.820)	TRUE
4	127336602	0.0966008	0.0162677	3.05647e-09	14306	ebi-a-GCST90016992	rs11098863	A	T	NA	Gut microbiota abundance (genus Enterorhabdus id.820)	TRUE
6	37567189	0.0755513	0.0166263	5.69626e-06	14306	ebi-a-GCST90016992	rs9470637	T	A	NA	Gut microbiota abundance (genus Enterorhabdus id.820)	TRUE
7	89709883	0.0843291	0.0189864	8.89857e-06	14306	ebi-a-GCST90016992	rs2051957	C	T	NA	Gut microbiota abundance (genus Enterorhabdus id.820)	TRUE
8	113109756	0.132323	0.0293688	6.40575e-06	14306	ebi-a-GCST90016992	rs10098492	T	C	NA	Gut microbiota abundance (genus Enterorhabdus id.820)	TRUE
10	20280612	-0.0860019	0.0169148	5.23854e-07	14306	ebi-a-GCST90016992	rs7923280	T	A	NA	Gut microbiota abundance (genus Enterorhabdus id.820)	TRUE
11	62174193	-0.0980897	0.0208995	2.94042e-06	14306	ebi-a-GCST90016992	rs3017103	G	A	NA	Gut microbiota abundance (genus Enterorhabdus id.820)	TRUE
12	69515102	0.26199	0.055123	4.8492e-06	14306	ebi-a-GCST90016992	rs73331712	T	C	NA	Gut microbiota abundance (genus Enterorhabdus id.820)	TRUE
2	63366962	0.169883	0.0315478	7.00971e-08	14306	ebi-a-GCST90017074	rs149744580	A	G	NA	Gut microbiota abundance (genus Turicibacter id.2162)	TRUE
5	95717619	0.131186	0.027197	2.5537e-06	14306	ebi-a-GCST90017074	rs4869133	G	A	NA	Gut microbiota abundance (genus Turicibacter id.2162)	TRUE
5	170048048	0.0710364	0.015343	3.45669e-06	14306	ebi-a-GCST90017074	rs2221441	G	C	NA	Gut microbiota abundance (genus Turicibacter id.2162)	TRUE
6	126111881	-0.120957	0.02683	5.31912e-06	14306	ebi-a-GCST90017074	rs3734633	G	A	NA	Gut microbiota abundance (genus Turicibacter id.2162)	TRUE
7	130972179	-0.115115	0.0240708	2.8053e-06	14306	ebi-a-GCST90017074	rs55756211	T	C	NA	Gut microbiota abundance (genus Turicibacter id.2162)	TRUE
8	26027842	0.0759019	0.0165764	5.63313e-06	14306	ebi-a-GCST90017074	rs2952020	A	G	NA	Gut microbiota abundance (genus Turicibacter id.2162)	TRUE
11	1681862	-0.0858591	0.0185778	4.13676e-06	14306	ebi-a-GCST90017074	rs61265175	G	C	NA	Gut microbiota abundance (genus Turicibacter id.2162)	TRUE
12	12242455	-0.104751	0.0226997	2.30978e-06	14306	ebi-a-GCST90017074	rs11054680	T	C	NA	Gut microbiota abundance (genus Turicibacter id.2162)	TRUE
15	92605098	-0.0710377	0.0155221	5.46072e-06	14306	ebi-a-GCST90017074	rs4247078	G	C	NA	Gut microbiota abundance (genus Turicibacter id.2162)	TRUE
16	10181248	0.0950891	0.0203433	3.26625e-06	14306	ebi-a-GCST90017074	rs11649454	G	C	NA	Gut microbiota abundance (genus Turicibacter id.2162)	TRUE
16	49826299	-0.0731428	0.0160172	5.7666e-06	14306	ebi-a-GCST90017074	rs7199484	G	A	NA	Gut microbiota abundance (genus Turicibacter id.2162)	TRUE
17	43117476	0.110861	0.0225598	8.66603e-07	14306	ebi-a-GCST90017074	rs12603364	T	C	NA	Gut microbiota abundance (genus Turicibacter id.2162)	TRUE
19	11864932	-0.111689	0.0248436	7.37106e-06	14306	ebi-a-GCST90017074	rs11666533	C	T	NA	Gut microbiota abundance (genus Turicibacter id.2162)	TRUE
21	36929643	-0.0959995	0.0208261	3.95585e-06	14306	ebi-a-GCST90017074	rs2834977	T	C	NA	Gut microbiota abundance (genus Turicibacter id.2162)	TRUE
1	8419420	0.160425	0.0360857	8.40601e-06	14306	ebi-a-GCST90016979	rs6577484	G	A	NA	Gut microbiota abundance (genus Clostridium innocuum group id.14397)	TRUE
3	103025517	-0.108859	0.023425	3.49406e-06	14306	ebi-a-GCST90016979	rs1948423	T	A	NA	Gut microbiota abundance (genus Clostridium innocuum group id.14397)	TRUE
5	9368158	0.142664	0.0311021	8.61529e-06	14306	ebi-a-GCST90016979	rs40656	C	T	NA	Gut microbiota abundance (genus Clostridium innocuum group id.14397)	TRUE
5	71186626	-0.113424	0.0233137	1.12243e-06	14306	ebi-a-GCST90016979	rs6890185	C	T	NA	Gut microbiota abundance (genus Clostridium innocuum group id.14397)	TRUE
5	95717619	-0.180591	0.0409505	7.24453e-06	14306	ebi-a-GCST90016979	rs4869133	G	A	NA	Gut microbiota abundance (genus Clostridium innocuum group id.14397)	TRUE
5	113126539	-0.102648	0.0227508	6.99939e-06	14306	ebi-a-GCST90016979	rs10074000	T	C	NA	Gut microbiota abundance (genus Clostridium innocuum group id.14397)	TRUE
6	143718234	-0.126746	0.0274657	7.8001e-06	14306	ebi-a-GCST90016979	rs71564433	T	A	NA	Gut microbiota abundance (genus Clostridium innocuum group id.14397)	TRUE
12	30268485	0.0997048	0.0221926	8.92442e-06	14306	ebi-a-GCST90016979	rs10506058	A	G	NA	Gut microbiota abundance (genus Clostridium innocuum group id.14397)	TRUE
15	59704208	-0.114993	0.0257186	8.40621e-06	14306	ebi-a-GCST90016979	rs77845139	A	G	NA	Gut microbiota abundance (genus Clostridium innocuum group id.14397)	TRUE
18	6348227	0.14708	0.0320875	5.58509e-06	14306	ebi-a-GCST90016979	rs61267978	T	C	NA	Gut microbiota abundance (genus Clostridium innocuum group id.14397)	TRUE
18	69274308	-0.157938	0.034187	4.0634e-06	14306	ebi-a-GCST90016979	rs1942371	G	A	NA	Gut microbiota abundance (genus Clostridium innocuum group id.14397)	TRUE
1	116082909	0.0870025	0.019779	9.75371e-06	14306	ebi-a-GCST90017003	rs143694765	T	C	NA	Gut microbiota abundance (genus Eubacterium rectale group id.14374)	TRUE
1	170900221	-0.0622701	0.0140572	6.8552e-06	14306	ebi-a-GCST90017003	rs3980709	A	T	NA	Gut microbiota abundance (genus Eubacterium rectale group id.14374)	TRUE
1	234530370	0.0503179	0.0108389	3.53387e-06	14306	ebi-a-GCST90017003	rs10797540	A	G	NA	Gut microbiota abundance (genus Eubacterium rectale group id.14374)	TRUE
2	125553155	0.0528824	0.0109486	1.37965e-06	14306	ebi-a-GCST90017003	rs314726	T	C	NA	Gut microbiota abundance (genus Eubacterium rectale group id.14374)	TRUE
7	121281238	-0.0527827	0.0113464	4.20678e-06	14306	ebi-a-GCST90017003	rs10248854	C	A	NA	Gut microbiota abundance (genus Eubacterium rectale group id.14374)	TRUE
9	92013419	0.0536319	0.0120201	9.89829e-06	14306	ebi-a-GCST90017003	rs62547233	A	G	NA	Gut microbiota abundance (genus Eubacterium rectale group id.14374)	TRUE
9	129425745	-0.0576035	0.0130853	5.36908e-06	14306	ebi-a-GCST90017003	rs59427698	A	G	NA	Gut microbiota abundance (genus Eubacterium rectale group id.14374)	TRUE
11	8129537	-0.129364	0.0289021	6.44421e-06	14306	ebi-a-GCST90017003	rs2884897	A	G	NA	Gut microbiota abundance (genus Eubacterium rectale group id.14374)	TRUE
11	98523638	-0.0635522	0.0140072	6.21828e-06	14306	ebi-a-GCST90017003	rs10892089	C	G	NA	Gut microbiota abundance (genus Eubacterium rectale group id.14374)	TRUE
12	20066025	-0.113141	0.0243541	1.84434e-06	14306	ebi-a-GCST90017003	rs117151453	G	C	NA	Gut microbiota abundance (genus Eubacterium rectale group id.14374)	TRUE
15	93006765	-0.0901402	0.0174602	5.39946e-07	14306	ebi-a-GCST90017003	rs35398954	A	G	NA	Gut microbiota abundance (genus Eubacterium rectale group id.14374)	TRUE
18	37703874	-0.156596	0.0336234	4.10129e-06	14306	ebi-a-GCST90017003	rs16960159	C	G	NA	Gut microbiota abundance (genus Eubacterium rectale group id.14374)	TRUE
1	200418805	-0.0714773	0.0146647	9.21977e-07	14306	ebi-a-GCST90016910	rs57872228	C	T	NA	Gut microbiota abundance (class Bacilli id.1673)	TRUE
2	231723657	0.0476864	0.0108547	7.97389e-06	14306	ebi-a-GCST90016910	rs1595463	C	A	NA	Gut microbiota abundance (class Bacilli id.1673)	TRUE
3	4800550	-0.0554219	0.0114789	1.38433e-06	14306	ebi-a-GCST90016910	rs1962325	G	C	NA	Gut microbiota abundance (class Bacilli id.1673)	TRUE
3	94153993	0.156331	0.0325945	1.07251e-06	14306	ebi-a-GCST90016910	rs76717940	T	A	NA	Gut microbiota abundance (class Bacilli id.1673)	TRUE
3	184371224	0.0979154	0.0224074	8.45688e-06	14306	ebi-a-GCST90016910	rs74663707	C	T	NA	Gut microbiota abundance (class Bacilli id.1673)	TRUE
3	64398863	0.0601035	0.0136407	9.53038e-06	14306	ebi-a-GCST90016910	rs13068444	A	G	NA	Gut microbiota abundance (class Bacilli id.1673)	TRUE
4	98049499	-0.0630747	0.0128717	1.96024e-06	14306	ebi-a-GCST90016910	rs11730038	G	A	NA	Gut microbiota abundance (class Bacilli id.1673)	TRUE
4	7431487	0.0535854	0.0116362	4.29833e-06	14306	ebi-a-GCST90016910	rs4459992	T	C	NA	Gut microbiota abundance (class Bacilli id.1673)	TRUE
4	184681021	0.128032	0.0286921	9.12809e-06	14306	ebi-a-GCST90016910	rs111552159	C	G	NA	Gut microbiota abundance (class Bacilli id.1673)	TRUE
4	151687420	0.104044	0.0247934	8.46837e-06	14306	ebi-a-GCST90016910	rs7666190	A	C	NA	Gut microbiota abundance (class Bacilli id.1673)	TRUE
5	174173171	-0.107255	0.0222879	1.33773e-06	14306	ebi-a-GCST90016910	rs77558518	A	G	NA	Gut microbiota abundance (class Bacilli id.1673)	TRUE
6	67570929	-0.104496	0.0217083	1.52753e-06	14306	ebi-a-GCST90016910	rs74352383	T	A	NA	Gut microbiota abundance (class Bacilli id.1673)	TRUE
7	36349586	0.108007	0.0232858	1.06891e-06	14306	ebi-a-GCST90016910	rs78938557	T	C	NA	Gut microbiota abundance (class Bacilli id.1673)	TRUE
8	10143164	0.0598868	0.0123903	1.07895e-06	14306	ebi-a-GCST90016910	rs2952251	G	A	NA	Gut microbiota abundance (class Bacilli id.1673)	TRUE
9	101101172	-0.0613034	0.0137579	7.81196e-06	14306	ebi-a-GCST90016910	rs28564647	T	G	NA	Gut microbiota abundance (class Bacilli id.1673)	TRUE
11	8332350	0.0572158	0.0126793	7.21174e-06	14306	ebi-a-GCST90016910	rs12797734	T	C	NA	Gut microbiota abundance (class Bacilli id.1673)	TRUE
12	100585559	-0.101189	0.0217379	4.85445e-06	14306	ebi-a-GCST90016910	rs11110282	A	G	NA	Gut microbiota abundance (class Bacilli id.1673)	TRUE
13	24973509	-0.225309	0.0467697	1.79457e-06	14306	ebi-a-GCST90016910	rs9581006	T	C	NA	Gut microbiota abundance (class Bacilli id.1673)	TRUE
15	58738075	-0.081146	0.0180042	7.59591e-06	14306	ebi-a-GCST90016910	rs694949	A	G	NA	Gut microbiota abundance (class Bacilli id.1673)	TRUE
16	991253	0.0619529	0.0127066	1.01499e-06	14306	ebi-a-GCST90016910	rs35344081	G	A	NA	Gut microbiota abundance (class Bacilli id.1673)	TRUE
17	40835649	-0.0520614	0.0109842	2.2076e-06	14306	ebi-a-GCST90016910	rs4028634	C	T	NA	Gut microbiota abundance (class Bacilli id.1673)	TRUE
19	51959855	0.111056	0.0246039	6.54591e-06	14306	ebi-a-GCST90016910	rs34989881	A	G	NA	Gut microbiota abundance (class Bacilli id.1673)	TRUE
1	105422565	-0.0655301	0.014223	4.13847e-06	14306	ebi-a-GCST90016957	rs11184341	C	G	NA	Gut microbiota abundance (family Verrucomicrobiaceae id.4036)	TRUE
1	41074472	-0.0758811	0.0167762	6.63025e-06	14306	ebi-a-GCST90016957	rs61779207	G	A	NA	Gut microbiota abundance (family Verrucomicrobiaceae id.4036)	TRUE
4	95027272	0.0749798	0.0150177	6.73085e-07	14306	ebi-a-GCST90016957	rs11729256	T	C	NA	Gut microbiota abundance (family Verrucomicrobiaceae id.4036)	TRUE
4	100544188	0.112124	0.0236422	1.64611e-06	14306	ebi-a-GCST90016957	rs74542928	T	C	NA	Gut microbiota abundance (family Verrucomicrobiaceae id.4036)	TRUE
6	56341481	-0.0704354	0.0147128	2.51287e-06	14306	ebi-a-GCST90016957	rs9349825	A	G	NA	Gut microbiota abundance (family Verrucomicrobiaceae id.4036)	TRUE
10	5064327	-0.0687992	0.0147694	2.75442e-06	14306	ebi-a-GCST90016957	rs4242783	A	G	NA	Gut microbiota abundance (family Verrucomicrobiaceae id.4036)	TRUE
11	130280667	-0.0648691	0.0135928	1.1293e-06	14306	ebi-a-GCST90016957	rs4936098	G	A	NA	Gut microbiota abundance (family Verrucomicrobiaceae id.4036)	TRUE
12	130309670	0.0907065	0.0196746	3.7313e-06	14306	ebi-a-GCST90016957	rs111862613	T	C	NA	Gut microbiota abundance (family Verrucomicrobiaceae id.4036)	TRUE
15	97570657	0.0619104	0.0130946	2.15139e-06	14306	ebi-a-GCST90016957	rs12908520	G	A	NA	Gut microbiota abundance (family Verrucomicrobiaceae id.4036)	TRUE
16	81063149	-0.0745516	0.0156195	2.69942e-06	14306	ebi-a-GCST90016957	rs2602429	T	C	NA	Gut microbiota abundance (family Verrucomicrobiaceae id.4036)	TRUE
18	49473635	0.204683	0.0431572	2.91823e-06	14306	ebi-a-GCST90016957	rs117107102	A	G	NA	Gut microbiota abundance (family Verrucomicrobiaceae id.4036)	TRUE
20	31867840	-0.0631526	0.0143767	9.5812e-06	14306	ebi-a-GCST90016957	rs941682	G	A	NA	Gut microbiota abundance (family Verrucomicrobiaceae id.4036)	TRUE
1	242767252	-0.0821108	0.0172701	2.59018e-06	14306	ebi-a-GCST90016928	rs12748533	G	T	NA	Gut microbiota abundance (family Bacteroidales S24 7group id.11173)	TRUE
2	53139362	-0.176187	0.0347133	5.11835e-07	14306	ebi-a-GCST90016928	rs17043785	T	C	NA	Gut microbiota abundance (family Bacteroidales S24 7group id.11173)	TRUE
3	158653545	0.122574	0.0272389	7.82781e-06	14306	ebi-a-GCST90016928	rs61508842	T	C	NA	Gut microbiota abundance (family Bacteroidales S24 7group id.11173)	TRUE
4	149300138	-0.0956546	0.0205228	6.10394e-06	14306	ebi-a-GCST90016928	rs6831034	T	A	NA	Gut microbiota abundance (family Bacteroidales S24 7group id.11173)	TRUE
5	164763068	0.0842142	0.0183739	8.77829e-06	14306	ebi-a-GCST90016928	rs11135366	C	G	NA	Gut microbiota abundance (family Bacteroidales S24 7group id.11173)	TRUE
6	63236747	-0.0867065	0.0195709	7.093e-06	14306	ebi-a-GCST90016928	rs78609301	A	G	NA	Gut microbiota abundance (family Bacteroidales S24 7group id.11173)	TRUE
6	151515172	0.123071	0.0275665	9.49008e-06	14306	ebi-a-GCST90016928	rs10872669	G	A	NA	Gut microbiota abundance (family Bacteroidales S24 7group id.11173)	TRUE
7	90714667	-0.0850266	0.0163382	3.15559e-07	14306	ebi-a-GCST90016928	rs941000	T	C	NA	Gut microbiota abundance (family Bacteroidales S24 7group id.11173)	TRUE
15	47340971	0.084048	0.0177806	2.4053e-06	14306	ebi-a-GCST90016928	rs1850003	A	G	NA	Gut microbiota abundance (family Bacteroidales S24 7group id.11173)	TRUE
17	21205200	0.0843019	0.0187308	8.42946e-06	14306	ebi-a-GCST90016928	rs7217209	C	T	NA	Gut microbiota abundance (family Bacteroidales S24 7group id.11173)	TRUE
22	25943322	0.0847328	0.0165856	3.82164e-07	14306	ebi-a-GCST90016928	rs738193	T	C	NA	Gut microbiota abundance (family Bacteroidales S24 7group id.11173)	TRUE
1	153240013	-0.0507782	0.0110587	4.51513e-06	14306	ebi-a-GCST90017094	rs1928341	G	A	NA	Gut microbiota abundance (order Burkholderiales id.2874)	TRUE
2	239900775	0.0679995	0.0132471	2.791e-07	14306	ebi-a-GCST90017094	rs62191117	A	G	NA	Gut microbiota abundance (order Burkholderiales id.2874)	TRUE
3	70588939	0.0580987	0.012673	4.83593e-06	14306	ebi-a-GCST90017094	rs7638039	T	C	NA	Gut microbiota abundance (order Burkholderiales id.2874)	TRUE
3	193456274	0.06333	0.0130595	1.23615e-06	14306	ebi-a-GCST90017094	rs2367850	G	C	NA	Gut microbiota abundance (order Burkholderiales id.2874)	TRUE
4	45642485	-0.0833445	0.0167489	5.66826e-07	14306	ebi-a-GCST90017094	rs4033856	T	C	NA	Gut microbiota abundance (order Burkholderiales id.2874)	TRUE
4	23588462	0.0910999	0.0199479	8.00092e-06	14306	ebi-a-GCST90017094	rs1511453	A	G	NA	Gut microbiota abundance (order Burkholderiales id.2874)	TRUE
5	173497796	0.109911	0.0236375	2.90228e-06	14306	ebi-a-GCST90017094	rs62395635	T	C	NA	Gut microbiota abundance (order Burkholderiales id.2874)	TRUE
7	111285025	0.0499561	0.0109264	4.13361e-06	14306	ebi-a-GCST90017094	rs2613606	T	C	NA	Gut microbiota abundance (order Burkholderiales id.2874)	TRUE
9	84206018	-0.133729	0.0290738	3.76218e-06	14306	ebi-a-GCST90017094	rs72747231	C	G	NA	Gut microbiota abundance (order Burkholderiales id.2874)	TRUE
13	58689340	-0.0508514	0.0109588	3.25784e-06	14306	ebi-a-GCST90017094	rs2321387	G	A	NA	Gut microbiota abundance (order Burkholderiales id.2874)	TRUE
15	56786407	-0.120974	0.0281273	9.74518e-06	14306	ebi-a-GCST90017094	rs75242906	C	T	NA	Gut microbiota abundance (order Burkholderiales id.2874)	TRUE
18	26569901	0.052509	0.011504	6.05982e-06	14306	ebi-a-GCST90017094	rs9964679	A	G	NA	Gut microbiota abundance (order Burkholderiales id.2874)	TRUE
20	30596130	-0.101587	0.0198817	2.88377e-07	14306	ebi-a-GCST90017094	rs6087811	T	G	NA	Gut microbiota abundance (order Burkholderiales id.2874)	TRUE
1	240118443	0.140717	0.0304142	2.79892e-06	14306	ebi-a-GCST90016977	rs12404911	C	T	NA	Gut microbiota abundance (genus Catenibacterium id.2153)	TRUE
4	122282768	-0.161826	0.0353447	3.62677e-06	14306	ebi-a-GCST90016977	rs77285108	G	A	NA	Gut microbiota abundance (genus Catenibacterium id.2153)	TRUE
6	159485742	0.135254	0.0286209	3.62485e-06	14306	ebi-a-GCST90016977	rs212393	A	G	NA	Gut microbiota abundance (genus Catenibacterium id.2153)	TRUE
6	105089665	0.11411	0.0251099	5.60725e-06	14306	ebi-a-GCST90016977	rs7742829	C	T	NA	Gut microbiota abundance (genus Catenibacterium id.2153)	TRUE
7	57364320	0.129726	0.0284563	4.29368e-06	14306	ebi-a-GCST90016977	rs73128290	A	G	NA	Gut microbiota abundance (genus Catenibacterium id.2153)	TRUE
1	11943792	0.220185	0.0485947	5.19194e-06	14306	ebi-a-GCST90017115	rs72640280	A	G	NA	Gut microbiota abundance (phylum Lentisphaerae id.2238)	TRUE
3	6223568	-0.131681	0.0288503	8.79387e-06	14306	ebi-a-GCST90017115	rs73113483	T	A	NA	Gut microbiota abundance (phylum Lentisphaerae id.2238)	TRUE
5	94720245	-0.109935	0.0236848	3.79603e-06	14306	ebi-a-GCST90017115	rs2731834	G	C	NA	Gut microbiota abundance (phylum Lentisphaerae id.2238)	TRUE
7	146795379	0.111896	0.0234776	1.13813e-06	14306	ebi-a-GCST90017115	rs11770843	C	T	NA	Gut microbiota abundance (phylum Lentisphaerae id.2238)	TRUE
9	111086170	-0.217203	0.0439621	9.64473e-07	14306	ebi-a-GCST90017115	rs62570196	C	T	NA	Gut microbiota abundance (phylum Lentisphaerae id.2238)	TRUE
10	53930085	-0.16062	0.0336806	9.1939e-06	14306	ebi-a-GCST90017115	rs60995569	T	G	NA	Gut microbiota abundance (phylum Lentisphaerae id.2238)	TRUE
13	20687179	0.120412	0.0270263	5.86462e-06	14306	ebi-a-GCST90017115	rs2031282	A	G	NA	Gut microbiota abundance (phylum Lentisphaerae id.2238)	TRUE
15	25162535	0.148972	0.0324162	6.76986e-06	14306	ebi-a-GCST90017115	rs17114848	G	A	NA	Gut microbiota abundance (phylum Lentisphaerae id.2238)	TRUE
15	101242690	-0.107661	0.0233382	4.30884e-06	14306	ebi-a-GCST90017115	rs1002941	A	G	NA	Gut microbiota abundance (phylum Lentisphaerae id.2238)	TRUE
20	61394262	0.229981	0.0479918	1.90265e-06	14306	ebi-a-GCST90017115	rs77599476	A	G	NA	Gut microbiota abundance (phylum Lentisphaerae id.2238)	TRUE
21	21023966	-0.138226	0.0289096	1.49772e-06	14306	ebi-a-GCST90017115	rs2825714	A	G	NA	Gut microbiota abundance (phylum Lentisphaerae id.2238)	TRUE
1	27418225	0.064399	0.0141246	5.82237e-06	14306	ebi-a-GCST90016945	rs12144792	C	T	NA	Gut microbiota abundance (family Peptococcaceae id.2024)	TRUE
2	188895743	0.0684213	0.0141137	1.46157e-06	14306	ebi-a-GCST90016945	rs12992764	T	G	NA	Gut microbiota abundance (family Peptococcaceae id.2024)	TRUE
3	182984048	-0.0739885	0.0150931	1.01109e-06	14306	ebi-a-GCST90016945	rs12634826	T	G	NA	Gut microbiota abundance (family Peptococcaceae id.2024)	TRUE
5	89252884	-0.147941	0.0317498	3.40847e-06	14306	ebi-a-GCST90016945	rs75430375	C	T	NA	Gut microbiota abundance (family Peptococcaceae id.2024)	TRUE
8	3580757	-0.0910387	0.0185869	1.74193e-06	14306	ebi-a-GCST90016945	rs4990837	G	A	NA	Gut microbiota abundance (family Peptococcaceae id.2024)	TRUE
8	28614217	0.0812655	0.0164355	4.94778e-07	14306	ebi-a-GCST90016945	rs35703006	G	T	NA	Gut microbiota abundance (family Peptococcaceae id.2024)	TRUE
9	9423378	-0.257982	0.0549569	3.15297e-06	14306	ebi-a-GCST90016945	rs117452796	A	G	NA	Gut microbiota abundance (family Peptococcaceae id.2024)	TRUE
10	129175962	0.135774	0.0289757	2.31308e-06	14306	ebi-a-GCST90016945	rs150600492	A	C	NA	Gut microbiota abundance (family Peptococcaceae id.2024)	TRUE
13	113561082	-0.0821779	0.0173541	2.02209e-06	14306	ebi-a-GCST90016945	rs75898026	A	G	NA	Gut microbiota abundance (family Peptococcaceae id.2024)	TRUE
1	58441860	-0.0935456	0.0193174	2.02428e-06	14306	ebi-a-GCST90017032	rs1187983	C	T	NA	Gut microbiota abundance (genus Marvinbryantia id.2005)	TRUE
1	211400180	0.0679323	0.015012	5.02736e-06	14306	ebi-a-GCST90017032	rs3125832	A	C	NA	Gut microbiota abundance (genus Marvinbryantia id.2005)	TRUE
3	166039765	-0.0634861	0.0136323	3.11279e-06	14306	ebi-a-GCST90017032	rs2863363	G	A	NA	Gut microbiota abundance (genus Marvinbryantia id.2005)	TRUE
6	132881664	-0.0649396	0.0131146	7.25371e-07	14306	ebi-a-GCST90017032	rs2842896	C	T	NA	Gut microbiota abundance (genus Marvinbryantia id.2005)	TRUE
10	12516924	0.0840769	0.0167551	6.28449e-07	14306	ebi-a-GCST90017032	rs2724813	G	A	NA	Gut microbiota abundance (genus Marvinbryantia id.2005)	TRUE
11	79518683	-0.126354	0.0272212	3.25912e-06	14306	ebi-a-GCST90017032	rs72948274	A	C	NA	Gut microbiota abundance (genus Marvinbryantia id.2005)	TRUE
11	45826561	0.124426	0.0248431	1.01163e-06	14306	ebi-a-GCST90017032	rs61884471	G	A	NA	Gut microbiota abundance (genus Marvinbryantia id.2005)	TRUE
13	86079090	0.119479	0.0271688	7.80171e-06	14306	ebi-a-GCST90017032	rs11620597	T	C	NA	Gut microbiota abundance (genus Marvinbryantia id.2005)	TRUE
14	21577837	-0.0952415	0.0216699	6.58082e-06	14306	ebi-a-GCST90017032	rs8006832	G	T	NA	Gut microbiota abundance (genus Marvinbryantia id.2005)	TRUE
16	5938448	-0.060618	0.0131551	4.14753e-06	14306	ebi-a-GCST90017032	rs11645029	G	C	NA	Gut microbiota abundance (genus Marvinbryantia id.2005)	TRUE
18	46255637	0.059681	0.0132289	6.60374e-06	14306	ebi-a-GCST90017032	rs12963345	C	G	NA	Gut microbiota abundance (genus Marvinbryantia id.2005)	TRUE
19	4542097	0.118845	0.0268423	6.86294e-06	14306	ebi-a-GCST90017032	rs146541147	G	A	NA	Gut microbiota abundance (genus Marvinbryantia id.2005)	TRUE
1	235580646	0.186779	0.0389112	1.70565e-06	14306	ebi-a-GCST90016975	rs7412979	C	G	NA	Gut microbiota abundance (genus Butyrivibrio id.1993)	TRUE
3	54288503	0.17471	0.0389333	8.18634e-06	14306	ebi-a-GCST90016975	rs4928024	G	A	NA	Gut microbiota abundance (genus Butyrivibrio id.1993)	TRUE
5	128976021	0.140987	0.0309117	5.51201e-06	14306	ebi-a-GCST90016975	rs17163238	G	A	NA	Gut microbiota abundance (genus Butyrivibrio id.1993)	TRUE
6	21960091	-0.119846	0.0253367	3.10656e-06	14306	ebi-a-GCST90016975	rs7763512	A	G	NA	Gut microbiota abundance (genus Butyrivibrio id.1993)	TRUE
6	53939724	-0.117973	0.0259861	5.54958e-06	14306	ebi-a-GCST90016975	rs9349693	G	A	NA	Gut microbiota abundance (genus Butyrivibrio id.1993)	TRUE
6	148403405	0.118065	0.0261271	7.92319e-06	14306	ebi-a-GCST90016975	rs1007475	G	T	NA	Gut microbiota abundance (genus Butyrivibrio id.1993)	TRUE
6	111780705	0.11923	0.0239975	7.69113e-07	14306	ebi-a-GCST90016975	rs7752361	G	A	NA	Gut microbiota abundance (genus Butyrivibrio id.1993)	TRUE
7	150596929	0.154775	0.0321539	2.20232e-06	14306	ebi-a-GCST90016975	rs11761679	T	C	NA	Gut microbiota abundance (genus Butyrivibrio id.1993)	TRUE
9	119693164	-0.133784	0.0299444	8.85911e-06	14306	ebi-a-GCST90016975	rs16934069	T	C	NA	Gut microbiota abundance (genus Butyrivibrio id.1993)	TRUE
10	22587900	0.205013	0.0457138	6.85536e-06	14306	ebi-a-GCST90016975	rs142855850	A	G	NA	Gut microbiota abundance (genus Butyrivibrio id.1993)	TRUE
13	27292666	-0.12459	0.0260992	1.80194e-06	14306	ebi-a-GCST90016975	rs4537857	T	C	NA	Gut microbiota abundance (genus Butyrivibrio id.1993)	TRUE
14	34150977	-0.201027	0.0428204	2.45748e-06	14306	ebi-a-GCST90016975	rs74622183	A	G	NA	Gut microbiota abundance (genus Butyrivibrio id.1993)	TRUE
14	76065563	0.224078	0.0449336	7.86249e-07	14306	ebi-a-GCST90016975	rs72723662	C	T	NA	Gut microbiota abundance (genus Butyrivibrio id.1993)	TRUE
17	20575697	0.127488	0.0267936	1.53183e-06	14306	ebi-a-GCST90016975	rs16941336	C	T	NA	Gut microbiota abundance (genus Butyrivibrio id.1993)	TRUE
18	10267733	0.216874	0.0483299	6.66423e-06	14306	ebi-a-GCST90016975	rs77356209	T	C	NA	Gut microbiota abundance (genus Butyrivibrio id.1993)	TRUE
20	811507	-0.108349	0.0240008	6.61089e-06	14306	ebi-a-GCST90016975	rs486484	A	G	NA	Gut microbiota abundance (genus Butyrivibrio id.1993)	TRUE
2	19973210	0.0893384	0.0199069	9.84419e-06	14306	ebi-a-GCST90016991	rs12710729	C	A	NA	Gut microbiota abundance (genus Eisenbergiella id.11304)	TRUE
3	111419486	0.120965	0.0263054	5.26842e-06	14306	ebi-a-GCST90016991	rs1553971	T	G	NA	Gut microbiota abundance (genus Eisenbergiella id.11304)	TRUE
4	189060431	-0.0978125	0.0216636	8.21826e-06	14306	ebi-a-GCST90016991	rs11938607	C	T	NA	Gut microbiota abundance (genus Eisenbergiella id.11304)	TRUE
8	55330814	0.137001	0.0302124	7.7464e-06	14306	ebi-a-GCST90016991	rs13258851	A	G	NA	Gut microbiota abundance (genus Eisenbergiella id.11304)	TRUE
8	50822676	-0.106447	0.0224159	2.71688e-06	14306	ebi-a-GCST90016991	rs3812426	A	G	NA	Gut microbiota abundance (genus Eisenbergiella id.11304)	TRUE
10	109417101	-0.0952742	0.0211569	8.85116e-06	14306	ebi-a-GCST90016991	rs12257723	A	C	NA	Gut microbiota abundance (genus Eisenbergiella id.11304)	TRUE
11	24001840	0.129006	0.0284844	4.9187e-06	14306	ebi-a-GCST90016991	rs11027642	C	T	NA	Gut microbiota abundance (genus Eisenbergiella id.11304)	TRUE
11	124764527	-0.121065	0.0251658	1.65002e-06	14306	ebi-a-GCST90016991	rs12278566	T	A	NA	Gut microbiota abundance (genus Eisenbergiella id.11304)	TRUE
15	36178565	-0.107319	0.022515	2.23748e-06	14306	ebi-a-GCST90016991	rs2683098	T	C	NA	Gut microbiota abundance (genus Eisenbergiella id.11304)	TRUE
15	53375201	0.091546	0.0195787	3.22887e-06	14306	ebi-a-GCST90016991	rs1508033	A	C	NA	Gut microbiota abundance (genus Eisenbergiella id.11304)	TRUE
17	53367641	0.100627	0.022546	7.34852e-06	14306	ebi-a-GCST90016991	rs11079158	T	C	NA	Gut microbiota abundance (genus Eisenbergiella id.11304)	TRUE
21	21610254	0.0939071	0.0201104	4.16217e-06	14306	ebi-a-GCST90016991	rs4462860	G	A	NA	Gut microbiota abundance (genus Eisenbergiella id.11304)	TRUE
1	118723685	-0.0805036	0.0167257	1.56776e-06	14306	ebi-a-GCST90016986	rs1582238	C	T	NA	Gut microbiota abundance (genus Defluviitaleaceae UCG011 id.11287)	TRUE
1	85205632	-0.13834	0.029554	3.51925e-06	14306	ebi-a-GCST90016986	rs9725395	A	G	NA	Gut microbiota abundance (genus Defluviitaleaceae UCG011 id.11287)	TRUE
3	72207794	0.0977912	0.0197263	9.59555e-07	14306	ebi-a-GCST90016986	rs4677103	A	G	NA	Gut microbiota abundance (genus Defluviitaleaceae UCG011 id.11287)	TRUE
4	120741726	0.0817755	0.0181686	6.82889e-06	14306	ebi-a-GCST90016986	rs2892880	G	A	NA	Gut microbiota abundance (genus Defluviitaleaceae UCG011 id.11287)	TRUE
4	147414743	-0.147383	0.0293796	4.33112e-07	14306	ebi-a-GCST90016986	rs72731813	C	T	NA	Gut microbiota abundance (genus Defluviitaleaceae UCG011 id.11287)	TRUE
7	79734541	0.106503	0.0238473	6.62811e-06	14306	ebi-a-GCST90016986	rs28696126	T	A	NA	Gut microbiota abundance (genus Defluviitaleaceae UCG011 id.11287)	TRUE
9	8786663	0.11381	0.0232806	1.44534e-06	14306	ebi-a-GCST90016986	rs112893842	T	C	NA	Gut microbiota abundance (genus Defluviitaleaceae UCG011 id.11287)	TRUE
10	66407366	-0.0715978	0.0156309	4.83237e-06	14306	ebi-a-GCST90016986	rs4344384	T	G	NA	Gut microbiota abundance (genus Defluviitaleaceae UCG011 id.11287)	TRUE
21	41811003	0.174369	0.0362226	2.15293e-06	14306	ebi-a-GCST90016986	rs55658617	T	C	NA	Gut microbiota abundance (genus Defluviitaleaceae UCG011 id.11287)	TRUE
22	24804081	0.142939	0.0299793	2.52046e-06	14306	ebi-a-GCST90016986	rs9608282	T	G	NA	Gut microbiota abundance (genus Defluviitaleaceae UCG011 id.11287)	TRUE
1	13794594	-0.0551473	0.0120346	4.38137e-06	14306	ebi-a-GCST90017054	rs3013089	G	A	NA	Gut microbiota abundance (genus Ruminococcaceae UCG003 id.11361)	TRUE
2	37905976	-0.0672094	0.0143309	4.15547e-06	14306	ebi-a-GCST90017054	rs10490280	C	T	NA	Gut microbiota abundance (genus Ruminococcaceae UCG003 id.11361)	TRUE
2	205238716	0.102523	0.0200204	7.86231e-07	14306	ebi-a-GCST90017054	rs6759615	A	G	NA	Gut microbiota abundance (genus Ruminococcaceae UCG003 id.11361)	TRUE
3	41982393	-0.115348	0.0249601	7.59259e-06	14306	ebi-a-GCST90017054	rs78720113	A	G	NA	Gut microbiota abundance (genus Ruminococcaceae UCG003 id.11361)	TRUE
6	105781538	0.0769231	0.017045	4.82125e-06	14306	ebi-a-GCST90017054	rs4532474	G	A	NA	Gut microbiota abundance (genus Ruminococcaceae UCG003 id.11361)	TRUE
7	51541468	-0.169857	0.0318768	1.50952e-07	14306	ebi-a-GCST90017054	rs73341549	T	C	NA	Gut microbiota abundance (genus Ruminococcaceae UCG003 id.11361)	TRUE
7	97348436	0.0546625	0.0120823	5.78376e-06	14306	ebi-a-GCST90017054	rs2523124	C	T	NA	Gut microbiota abundance (genus Ruminococcaceae UCG003 id.11361)	TRUE
8	82026852	-0.0634463	0.0134741	3.29337e-06	14306	ebi-a-GCST90017054	rs4452755	A	C	NA	Gut microbiota abundance (genus Ruminococcaceae UCG003 id.11361)	TRUE
9	134416970	-0.0925653	0.0191203	1.66882e-06	14306	ebi-a-GCST90017054	rs11243416	T	C	NA	Gut microbiota abundance (genus Ruminococcaceae UCG003 id.11361)	TRUE
12	75496463	0.0727604	0.0155716	1.6251e-06	14306	ebi-a-GCST90017054	rs11613919	G	T	NA	Gut microbiota abundance (genus Ruminococcaceae UCG003 id.11361)	TRUE
13	31520446	0.117283	0.025971	7.21157e-06	14306	ebi-a-GCST90017054	rs73165080	T	A	NA	Gut microbiota abundance (genus Ruminococcaceae UCG003 id.11361)	TRUE
15	35071718	-0.062527	0.0131259	2.21707e-06	14306	ebi-a-GCST90017054	rs16959793	A	C	NA	Gut microbiota abundance (genus Ruminococcaceae UCG003 id.11361)	TRUE
18	46485154	-0.0553742	0.0122659	6.5435e-06	14306	ebi-a-GCST90017054	rs4629039	A	T	NA	Gut microbiota abundance (genus Ruminococcaceae UCG003 id.11361)	TRUE
19	49209851	0.0586696	0.0118369	7.83177e-07	14306	ebi-a-GCST90017054	rs646327	G	A	NA	Gut microbiota abundance (genus Ruminococcaceae UCG003 id.11361)	TRUE
22	25292719	-0.0577655	0.0130645	9.7212e-06	14306	ebi-a-GCST90017054	rs139730	G	C	NA	Gut microbiota abundance (genus Ruminococcaceae UCG003 id.11361)	TRUE
1	55522083	-0.143901	0.03054	2.19129e-06	14306	ebi-a-GCST90017118	rs45598138	C	A	NA	Gut microbiota abundance (phylum Verrucomicrobia id.3982)	TRUE
1	41074472	-0.0755253	0.0164385	5.27971e-06	14306	ebi-a-GCST90017118	rs61779207	G	A	NA	Gut microbiota abundance (phylum Verrucomicrobia id.3982)	TRUE
4	16548975	0.171057	0.0398053	9.81386e-06	14306	ebi-a-GCST90017118	rs12512971	A	C	NA	Gut microbiota abundance (phylum Verrucomicrobia id.3982)	TRUE
4	95027272	0.0696984	0.0146953	2.23404e-06	14306	ebi-a-GCST90017118	rs11729256	T	C	NA	Gut microbiota abundance (phylum Verrucomicrobia id.3982)	TRUE
4	100544188	0.115994	0.0231324	4.08376e-07	14306	ebi-a-GCST90017118	rs74542928	T	C	NA	Gut microbiota abundance (phylum Verrucomicrobia id.3982)	TRUE
5	40438158	-0.11753	0.025458	3.49559e-06	14306	ebi-a-GCST90017118	rs76430504	T	C	NA	Gut microbiota abundance (phylum Verrucomicrobia id.3982)	TRUE
6	56341481	-0.0660243	0.0143911	6.2748e-06	14306	ebi-a-GCST90017118	rs9349825	A	G	NA	Gut microbiota abundance (phylum Verrucomicrobia id.3982)	TRUE
10	11389614	0.0610914	0.0138592	9.7221e-06	14306	ebi-a-GCST90017118	rs3995795	C	T	NA	Gut microbiota abundance (phylum Verrucomicrobia id.3982)	TRUE
10	5073050	0.0784055	0.0162769	1.10555e-06	14306	ebi-a-GCST90017118	rs11252894	A	C	NA	Gut microbiota abundance (phylum Verrucomicrobia id.3982)	TRUE
15	97570657	0.0594916	0.012823	3.40447e-06	14306	ebi-a-GCST90017118	rs12908520	G	A	NA	Gut microbiota abundance (phylum Verrucomicrobia id.3982)	TRUE
16	81063149	-0.0764148	0.0153487	8.71044e-07	14306	ebi-a-GCST90017118	rs2602429	T	C	NA	Gut microbiota abundance (phylum Verrucomicrobia id.3982)	TRUE
18	49473635	0.204283	0.0427565	2.67935e-06	14306	ebi-a-GCST90017118	rs117107102	A	G	NA	Gut microbiota abundance (phylum Verrucomicrobia id.3982)	TRUE
1	187906034	-0.0586677	0.0125277	2.81022e-06	14306	ebi-a-GCST90017056	rs7555878	G	A	NA	Gut microbiota abundance (genus Ruminococcaceae UCG005 id.11363)	TRUE
2	198122357	-0.146604	0.0316034	3.21855e-06	14306	ebi-a-GCST90017056	rs114279581	A	G	NA	Gut microbiota abundance (genus Ruminococcaceae UCG005 id.11363)	TRUE
2	239509030	0.0782349	0.0176458	8.81455e-06	14306	ebi-a-GCST90017056	rs7586445	G	A	NA	Gut microbiota abundance (genus Ruminococcaceae UCG005 id.11363)	TRUE
4	7302344	-0.0755811	0.0168226	8.17354e-06	14306	ebi-a-GCST90017056	rs10937802	A	G	NA	Gut microbiota abundance (genus Ruminococcaceae UCG005 id.11363)	TRUE
5	32755085	0.158082	0.0319586	9.28111e-07	14306	ebi-a-GCST90017056	rs60081663	C	G	NA	Gut microbiota abundance (genus Ruminococcaceae UCG005 id.11363)	TRUE
5	154003091	0.0599163	0.0130836	4.80773e-06	14306	ebi-a-GCST90017056	rs7449320	C	A	NA	Gut microbiota abundance (genus Ruminococcaceae UCG005 id.11363)	TRUE
7	18026604	-0.0577628	0.011412	4.29804e-07	14306	ebi-a-GCST90017056	rs10950694	C	T	NA	Gut microbiota abundance (genus Ruminococcaceae UCG005 id.11363)	TRUE
8	3099727	0.0686153	0.0146252	3.75405e-06	14306	ebi-a-GCST90017056	rs35166120	G	C	NA	Gut microbiota abundance (genus Ruminococcaceae UCG005 id.11363)	TRUE
10	62662781	-0.073644	0.015548	3.53843e-06	14306	ebi-a-GCST90017056	rs2893871	G	A	NA	Gut microbiota abundance (genus Ruminococcaceae UCG005 id.11363)	TRUE
10	4240906	0.087067	0.0197179	5.3571e-06	14306	ebi-a-GCST90017056	rs72776570	C	A	NA	Gut microbiota abundance (genus Ruminococcaceae UCG005 id.11363)	TRUE
11	27747671	0.066635	0.0144356	3.10277e-06	14306	ebi-a-GCST90017056	rs12288512	A	G	NA	Gut microbiota abundance (genus Ruminococcaceae UCG005 id.11363)	TRUE
12	47384118	0.121548	0.0279546	7.37038e-06	14306	ebi-a-GCST90017056	rs55793120	T	C	NA	Gut microbiota abundance (genus Ruminococcaceae UCG005 id.11363)	TRUE
14	94630731	-0.0654843	0.0143973	4.11169e-06	14306	ebi-a-GCST90017056	rs10873449	C	T	NA	Gut microbiota abundance (genus Ruminococcaceae UCG005 id.11363)	TRUE
15	68705697	0.123012	0.0286671	7.46311e-06	14306	ebi-a-GCST90017056	rs898577	C	T	NA	Gut microbiota abundance (genus Ruminococcaceae UCG005 id.11363)	TRUE
17	7034575	0.0692909	0.0148712	2.59896e-06	14306	ebi-a-GCST90017056	rs394449	A	T	NA	Gut microbiota abundance (genus Ruminococcaceae UCG005 id.11363)	TRUE
18	22575871	0.0677322	0.0144525	2.41024e-06	14306	ebi-a-GCST90017056	rs12458218	T	C	NA	Gut microbiota abundance (genus Ruminococcaceae UCG005 id.11363)	TRUE
20	16312851	0.188685	0.0386484	6.04728e-07	14306	ebi-a-GCST90017056	rs34781347	G	A	NA	Gut microbiota abundance (genus Ruminococcaceae UCG005 id.11363)	TRUE
1	115168097	0.0901946	0.0196476	3.09628e-06	14306	ebi-a-GCST90017065	rs12136548	C	T	NA	Gut microbiota abundance (genus Ruminococcus gnavus group id.14376)	TRUE
2	122096018	-0.105045	0.0229588	2.73703e-06	14306	ebi-a-GCST90017065	rs934940	A	C	NA	Gut microbiota abundance (genus Ruminococcus gnavus group id.14376)	TRUE
2	36259341	-0.0846861	0.0187936	7.11803e-06	14306	ebi-a-GCST90017065	rs12989336	G	A	NA	Gut microbiota abundance (genus Ruminococcus gnavus group id.14376)	TRUE
2	144700007	0.185289	0.0396295	3.49526e-06	14306	ebi-a-GCST90017065	rs62167033	T	C	NA	Gut microbiota abundance (genus Ruminococcus gnavus group id.14376)	TRUE
3	146290310	0.144445	0.0326618	6.62995e-06	14306	ebi-a-GCST90017065	rs78399089	T	C	NA	Gut microbiota abundance (genus Ruminococcus gnavus group id.14376)	TRUE
3	66701616	0.0849233	0.0176643	1.66027e-06	14306	ebi-a-GCST90017065	rs9872758	T	C	NA	Gut microbiota abundance (genus Ruminococcus gnavus group id.14376)	TRUE
4	190110710	0.0904997	0.0203544	9.11633e-06	14306	ebi-a-GCST90017065	rs4388134	T	C	NA	Gut microbiota abundance (genus Ruminococcus gnavus group id.14376)	TRUE
5	18662686	-0.127377	0.0233883	5.61009e-08	14306	ebi-a-GCST90017065	rs13163520	G	A	NA	Gut microbiota abundance (genus Ruminococcus gnavus group id.14376)	TRUE
8	129224680	0.0909965	0.018351	7.40952e-07	14306	ebi-a-GCST90017065	rs2909242	A	C	NA	Gut microbiota abundance (genus Ruminococcus gnavus group id.14376)	TRUE
9	135838591	0.11599	0.0249099	2.6652e-06	14306	ebi-a-GCST90017065	rs3124783	G	A	NA	Gut microbiota abundance (genus Ruminococcus gnavus group id.14376)	TRUE
10	6512581	0.114673	0.0250653	6.94864e-06	14306	ebi-a-GCST90017065	rs11597105	A	G	NA	Gut microbiota abundance (genus Ruminococcus gnavus group id.14376)	TRUE
16	433078	-0.139804	0.0318253	5.00876e-06	14306	ebi-a-GCST90017065	rs11864644	T	C	NA	Gut microbiota abundance (genus Ruminococcus gnavus group id.14376)	TRUE
1	172809633	0.0727223	0.016451	9.46085e-06	14306	ebi-a-GCST90016988	rs75416973	A	G	NA	Gut microbiota abundance (genus Dialister id.2183)	TRUE
3	45809449	-0.0601454	0.0135366	9.60771e-06	14306	ebi-a-GCST90016988	rs764177	C	A	NA	Gut microbiota abundance (genus Dialister id.2183)	TRUE
4	23294359	0.0773514	0.0170915	7.37055e-06	14306	ebi-a-GCST90016988	rs10938938	A	G	NA	Gut microbiota abundance (genus Dialister id.2183)	TRUE
7	150890034	0.0647132	0.0143314	5.93267e-06	14306	ebi-a-GCST90016988	rs2435610	A	C	NA	Gut microbiota abundance (genus Dialister id.2183)	TRUE
8	138295725	-0.0655301	0.013186	5.50744e-07	14306	ebi-a-GCST90016988	rs11166701	G	A	NA	Gut microbiota abundance (genus Dialister id.2183)	TRUE
9	25447080	-0.161296	0.0364332	8.19219e-06	14306	ebi-a-GCST90016988	rs76680460	G	A	NA	Gut microbiota abundance (genus Dialister id.2183)	TRUE
10	23199653	0.0668509	0.0147685	5.83727e-06	14306	ebi-a-GCST90016988	rs4747450	C	A	NA	Gut microbiota abundance (genus Dialister id.2183)	TRUE
11	10967286	0.076227	0.0170411	5.1363e-06	14306	ebi-a-GCST90016988	rs517089	T	A	NA	Gut microbiota abundance (genus Dialister id.2183)	TRUE
11	92267129	0.0596297	0.0130052	4.8568e-06	14306	ebi-a-GCST90016988	rs4753063	A	G	NA	Gut microbiota abundance (genus Dialister id.2183)	TRUE
14	102458052	-0.113054	0.0261933	7.88116e-06	14306	ebi-a-GCST90016988	rs10138457	T	C	NA	Gut microbiota abundance (genus Dialister id.2183)	TRUE
15	32955095	0.0662403	0.0146315	5.91412e-06	14306	ebi-a-GCST90016988	rs11071887	T	C	NA	Gut microbiota abundance (genus Dialister id.2183)	TRUE
16	9336862	0.0865932	0.0193719	8.07904e-06	14306	ebi-a-GCST90016988	rs2314294	T	C	NA	Gut microbiota abundance (genus Dialister id.2183)	TRUE
1	210628449	-0.190729	0.0433608	7.16902e-06	14306	ebi-a-GCST90017012	rs3765837	T	G	NA	Gut microbiota abundance (genus Gordonibacter id.821)	TRUE
1	83136096	-0.21399	0.0490592	7.98197e-06	14306	ebi-a-GCST90017012	rs72939513	A	G	NA	Gut microbiota abundance (genus Gordonibacter id.821)	TRUE
2	30158494	0.107597	0.0239228	8.61133e-06	14306	ebi-a-GCST90017012	rs13412653	A	C	NA	Gut microbiota abundance (genus Gordonibacter id.821)	TRUE
3	187450354	-0.242965	0.0466177	1.67487e-07	14306	ebi-a-GCST90017012	rs76287110	A	T	NA	Gut microbiota abundance (genus Gordonibacter id.821)	TRUE
4	8142607	-0.180293	0.0403296	8.10849e-06	14306	ebi-a-GCST90017012	rs35042269	C	A	NA	Gut microbiota abundance (genus Gordonibacter id.821)	TRUE
4	136768501	0.181405	0.0377102	1.42889e-06	14306	ebi-a-GCST90017012	rs72714787	C	A	NA	Gut microbiota abundance (genus Gordonibacter id.821)	TRUE
7	136937189	0.17869	0.037722	4.0242e-06	14306	ebi-a-GCST90017012	rs322296	G	A	NA	Gut microbiota abundance (genus Gordonibacter id.821)	TRUE
7	47144505	-0.153972	0.0338918	7.03947e-06	14306	ebi-a-GCST90017012	rs71545975	A	G	NA	Gut microbiota abundance (genus Gordonibacter id.821)	TRUE
7	129433205	-0.128261	0.0285123	9.16706e-06	14306	ebi-a-GCST90017012	rs117347059	G	C	NA	Gut microbiota abundance (genus Gordonibacter id.821)	TRUE
7	18970607	-0.149852	0.0333315	7.75586e-06	14306	ebi-a-GCST90017012	rs768830	A	G	NA	Gut microbiota abundance (genus Gordonibacter id.821)	TRUE
9	88787144	-0.102908	0.0231571	9.0567e-06	14306	ebi-a-GCST90017012	rs4596722	G	A	NA	Gut microbiota abundance (genus Gordonibacter id.821)	TRUE
12	131024079	-0.172495	0.0388567	8.36681e-06	14306	ebi-a-GCST90017012	rs61934597	C	T	NA	Gut microbiota abundance (genus Gordonibacter id.821)	TRUE
12	29024534	-0.12867	0.0249946	3.43764e-07	14306	ebi-a-GCST90017012	rs7294633	T	C	NA	Gut microbiota abundance (genus Gordonibacter id.821)	TRUE
17	10148653	0.116884	0.0234834	6.70641e-07	14306	ebi-a-GCST90017012	rs7220558	A	T	NA	Gut microbiota abundance (genus Gordonibacter id.821)	TRUE
17	52957210	-0.196423	0.0433538	6.37016e-06	14306	ebi-a-GCST90017012	rs16955299	G	A	NA	Gut microbiota abundance (genus Gordonibacter id.821)	TRUE
1	67595108	0.197389	0.0458642	7.72058e-06	14306	ebi-a-GCST90016966	rs13376554	A	T	NA	Gut microbiota abundance (genus Anaerostipes id.1991)	TRUE
2	228018671	0.0512653	0.0109555	2.91092e-06	14306	ebi-a-GCST90016966	rs2396460	C	T	NA	Gut microbiota abundance (genus Anaerostipes id.1991)	TRUE
2	142774333	0.088573	0.0185548	1.44907e-06	14306	ebi-a-GCST90016966	rs62157625	T	C	NA	Gut microbiota abundance (genus Anaerostipes id.1991)	TRUE
2	39351569	-0.0877497	0.0189408	3.32216e-06	14306	ebi-a-GCST90016966	rs6726833	C	A	NA	Gut microbiota abundance (genus Anaerostipes id.1991)	TRUE
3	171100102	0.0515687	0.0112199	4.68058e-06	14306	ebi-a-GCST90016966	rs2014785	T	C	NA	Gut microbiota abundance (genus Anaerostipes id.1991)	TRUE
4	169690814	0.0508482	0.0109075	3.1958e-06	14306	ebi-a-GCST90016966	rs6854026	C	T	NA	Gut microbiota abundance (genus Anaerostipes id.1991)	TRUE
8	128397494	0.0621085	0.0136614	5.84198e-06	14306	ebi-a-GCST90016966	rs7823228	C	G	NA	Gut microbiota abundance (genus Anaerostipes id.1991)	TRUE
9	1582701	0.0500065	0.0112001	6.74481e-06	14306	ebi-a-GCST90016966	rs6474958	G	A	NA	Gut microbiota abundance (genus Anaerostipes id.1991)	TRUE
9	13525082	-0.110013	0.0236302	2.74764e-06	14306	ebi-a-GCST90016966	rs3900776	G	A	NA	Gut microbiota abundance (genus Anaerostipes id.1991)	TRUE
10	117383184	0.053089	0.0110983	2.04052e-06	14306	ebi-a-GCST90016966	rs2804244	G	A	NA	Gut microbiota abundance (genus Anaerostipes id.1991)	TRUE
11	105615253	0.0835752	0.0192017	7.93542e-06	14306	ebi-a-GCST90016966	rs10502061	A	G	NA	Gut microbiota abundance (genus Anaerostipes id.1991)	TRUE
16	77574020	-0.0750642	0.0150723	5.35476e-07	14306	ebi-a-GCST90016966	rs7193624	T	C	NA	Gut microbiota abundance (genus Anaerostipes id.1991)	TRUE
17	2850737	-0.0539901	0.0116575	4.42059e-06	14306	ebi-a-GCST90016966	rs60983350	G	A	NA	Gut microbiota abundance (genus Anaerostipes id.1991)	TRUE
19	1497547	-0.137429	0.0305304	5.33384e-06	14306	ebi-a-GCST90016966	rs78735375	A	C	NA	Gut microbiota abundance (genus Anaerostipes id.1991)	TRUE
21	25873624	0.0644965	0.0136702	1.9777e-06	14306	ebi-a-GCST90016966	rs62215703	G	A	NA	Gut microbiota abundance (genus Anaerostipes id.1991)	TRUE
1	11943792	0.220207	0.0486196	5.18036e-06	14306	ebi-a-GCST90016918	rs72640280	A	G	NA	Gut microbiota abundance (class Lentisphaeria id.2250)	TRUE
3	6223568	-0.131217	0.0288713	8.66343e-06	14306	ebi-a-GCST90016918	rs73113483	T	A	NA	Gut microbiota abundance (class Lentisphaeria id.2250)	TRUE
5	94720245	-0.109438	0.023693	4.24356e-06	14306	ebi-a-GCST90016918	rs2731834	G	C	NA	Gut microbiota abundance (class Lentisphaeria id.2250)	TRUE
7	146795379	0.109431	0.0234879	1.9073e-06	14306	ebi-a-GCST90016918	rs11770843	C	T	NA	Gut microbiota abundance (class Lentisphaeria id.2250)	TRUE
9	111086170	-0.21635	0.0439866	1.07924e-06	14306	ebi-a-GCST90016918	rs62570196	C	T	NA	Gut microbiota abundance (class Lentisphaeria id.2250)	TRUE
13	20687179	0.122368	0.0270329	4.38258e-06	14306	ebi-a-GCST90016918	rs2031282	A	G	NA	Gut microbiota abundance (class Lentisphaeria id.2250)	TRUE
15	25162535	0.152377	0.0324332	4.05864e-06	14306	ebi-a-GCST90016918	rs17114848	G	A	NA	Gut microbiota abundance (class Lentisphaeria id.2250)	TRUE
15	101242690	-0.105025	0.0233484	8.14836e-06	14306	ebi-a-GCST90016918	rs1002941	A	G	NA	Gut microbiota abundance (class Lentisphaeria id.2250)	TRUE
20	61394262	0.230292	0.0480168	1.86132e-06	14306	ebi-a-GCST90016918	rs77599476	A	G	NA	Gut microbiota abundance (class Lentisphaeria id.2250)	TRUE
21	21023966	-0.13741	0.0289246	1.72211e-06	14306	ebi-a-GCST90016918	rs2825714	A	G	NA	Gut microbiota abundance (class Lentisphaeria id.2250)	TRUE
2	4015933	0.0990404	0.0215877	6.95312e-06	14306	ebi-a-GCST90016936	rs80319214	C	G	NA	Gut microbiota abundance (family Enterobacteriaceae id.3469)	TRUE
2	42133542	0.0582927	0.0126195	4.51617e-06	14306	ebi-a-GCST90016936	rs2374342	C	A	NA	Gut microbiota abundance (family Enterobacteriaceae id.3469)	TRUE
11	2563450	0.110561	0.0241719	3.65359e-06	14306	ebi-a-GCST90016936	rs111229068	A	T	NA	Gut microbiota abundance (family Enterobacteriaceae id.3469)	TRUE
11	22379097	0.0822408	0.0186379	9.42692e-06	14306	ebi-a-GCST90016936	rs11026530	T	C	NA	Gut microbiota abundance (family Enterobacteriaceae id.3469)	TRUE
13	110840418	0.0758597	0.0171286	9.31859e-06	14306	ebi-a-GCST90016936	rs79757635	C	A	NA	Gut microbiota abundance (family Enterobacteriaceae id.3469)	TRUE
14	27718039	-0.0605392	0.0133696	8.53532e-06	14306	ebi-a-GCST90016936	rs61973590	C	G	NA	Gut microbiota abundance (family Enterobacteriaceae id.3469)	TRUE
16	54327745	0.0899642	0.0202934	7.63115e-06	14306	ebi-a-GCST90016936	rs35673018	G	A	NA	Gut microbiota abundance (family Enterobacteriaceae id.3469)	TRUE
17	13521040	0.115598	0.0257683	9.48965e-06	14306	ebi-a-GCST90016936	rs4792380	A	T	NA	Gut microbiota abundance (family Enterobacteriaceae id.3469)	TRUE
18	55145547	0.084159	0.0189479	5.17095e-06	14306	ebi-a-GCST90016936	rs504442	T	G	NA	Gut microbiota abundance (family Enterobacteriaceae id.3469)	TRUE
18	57672335	-0.0848521	0.0170415	1.19564e-06	14306	ebi-a-GCST90016936	rs78143293	A	G	NA	Gut microbiota abundance (family Enterobacteriaceae id.3469)	TRUE
20	55340092	0.0606754	0.0130125	3.13163e-06	14306	ebi-a-GCST90016936	rs62210023	A	G	NA	Gut microbiota abundance (family Enterobacteriaceae id.3469)	TRUE
1	200418805	-0.0688415	0.0146994	2.5825e-06	14306	ebi-a-GCST90017101	rs57872228	C	T	NA	Gut microbiota abundance (order Lactobacillales id.1800)	TRUE
2	231723657	0.0479749	0.0108801	7.44355e-06	14306	ebi-a-GCST90017101	rs1595463	C	A	NA	Gut microbiota abundance (order Lactobacillales id.1800)	TRUE
3	4800550	-0.0546878	0.0115069	1.96232e-06	14306	ebi-a-GCST90017101	rs1962325	G	C	NA	Gut microbiota abundance (order Lactobacillales id.1800)	TRUE
3	184371224	0.0982594	0.0224613	8.39557e-06	14306	ebi-a-GCST90017101	rs74663707	C	T	NA	Gut microbiota abundance (order Lactobacillales id.1800)	TRUE
3	94153993	0.160943	0.0327	6.55315e-07	14306	ebi-a-GCST90017101	rs76717940	T	A	NA	Gut microbiota abundance (order Lactobacillales id.1800)	TRUE
4	184681021	0.128854	0.0287397	8.30807e-06	14306	ebi-a-GCST90017101	rs111552159	C	G	NA	Gut microbiota abundance (order Lactobacillales id.1800)	TRUE
4	98049499	-0.0605384	0.0129052	5.09742e-06	14306	ebi-a-GCST90017101	rs11730038	G	A	NA	Gut microbiota abundance (order Lactobacillales id.1800)	TRUE
5	174173171	-0.106466	0.0223484	1.67436e-06	14306	ebi-a-GCST90017101	rs77558518	A	G	NA	Gut microbiota abundance (order Lactobacillales id.1800)	TRUE
6	67570929	-0.103396	0.021758	1.88027e-06	14306	ebi-a-GCST90017101	rs74352383	T	A	NA	Gut microbiota abundance (order Lactobacillales id.1800)	TRUE
7	36349586	0.10553	0.0233581	2.31089e-06	14306	ebi-a-GCST90017101	rs78938557	T	C	NA	Gut microbiota abundance (order Lactobacillales id.1800)	TRUE
8	10143164	0.0629317	0.0124177	3.36457e-07	14306	ebi-a-GCST90017101	rs2952251	G	A	NA	Gut microbiota abundance (order Lactobacillales id.1800)	TRUE
11	8332350	0.0571279	0.0127113	7.76515e-06	14306	ebi-a-GCST90017101	rs12797734	T	C	NA	Gut microbiota abundance (order Lactobacillales id.1800)	TRUE
12	100585559	-0.10239	0.0217849	3.95667e-06	14306	ebi-a-GCST90017101	rs11110282	A	G	NA	Gut microbiota abundance (order Lactobacillales id.1800)	TRUE
13	24973509	-0.22583	0.0469228	1.76596e-06	14306	ebi-a-GCST90017101	rs9581006	T	C	NA	Gut microbiota abundance (order Lactobacillales id.1800)	TRUE
14	33200623	0.0499263	0.0109744	5.08757e-06	14306	ebi-a-GCST90017101	rs11627423	C	A	NA	Gut microbiota abundance (order Lactobacillales id.1800)	TRUE
14	97526750	-0.08054	0.0180992	8.33489e-06	14306	ebi-a-GCST90017101	rs2370083	G	T	NA	Gut microbiota abundance (order Lactobacillales id.1800)	TRUE
16	991253	0.0642442	0.0127358	4.16064e-07	14306	ebi-a-GCST90017101	rs35344081	G	A	NA	Gut microbiota abundance (order Lactobacillales id.1800)	TRUE
17	40835649	-0.0532915	0.01101	1.34806e-06	14306	ebi-a-GCST90017101	rs4028634	C	T	NA	Gut microbiota abundance (order Lactobacillales id.1800)	TRUE
19	51959855	0.113479	0.0246452	4.09355e-06	14306	ebi-a-GCST90017101	rs34989881	A	G	NA	Gut microbiota abundance (order Lactobacillales id.1800)	TRUE
1	53773248	-0.118868	0.0259753	3.38174e-06	14306	ebi-a-GCST90017025	rs78848836	A	G	NA	Gut microbiota abundance (genus Lachnospiraceae UCG001 id.11321)	TRUE
1	166199362	0.117095	0.02591	7.39861e-06	14306	ebi-a-GCST90017025	rs12131224	C	T	NA	Gut microbiota abundance (genus Lachnospiraceae UCG001 id.11321)	TRUE
1	82384407	0.0751466	0.0153934	1.10647e-06	14306	ebi-a-GCST90017025	rs2050911	G	A	NA	Gut microbiota abundance (genus Lachnospiraceae UCG001 id.11321)	TRUE
1	108102470	-0.087088	0.0197008	8.27428e-06	14306	ebi-a-GCST90017025	rs79476906	T	A	NA	Gut microbiota abundance (genus Lachnospiraceae UCG001 id.11321)	TRUE
3	42568440	0.0784637	0.0144768	7.16556e-08	14306	ebi-a-GCST90017025	rs437876	T	C	NA	Gut microbiota abundance (genus Lachnospiraceae UCG001 id.11321)	TRUE
3	148269083	-0.0970258	0.0181807	1.45589e-07	14306	ebi-a-GCST90017025	rs985416	T	C	NA	Gut microbiota abundance (genus Lachnospiraceae UCG001 id.11321)	TRUE
6	145006780	0.107801	0.0229777	3.46785e-06	14306	ebi-a-GCST90017025	rs9403580	C	T	NA	Gut microbiota abundance (genus Lachnospiraceae UCG001 id.11321)	TRUE
7	96965504	-0.0748504	0.0165681	5.87503e-06	14306	ebi-a-GCST90017025	rs62496417	T	G	NA	Gut microbiota abundance (genus Lachnospiraceae UCG001 id.11321)	TRUE
8	56839500	-0.0784757	0.0177648	9.48135e-06	14306	ebi-a-GCST90017025	rs7341608	T	C	NA	Gut microbiota abundance (genus Lachnospiraceae UCG001 id.11321)	TRUE
9	14477851	-0.107898	0.0232346	3.10506e-06	14306	ebi-a-GCST90017025	rs573933	T	C	NA	Gut microbiota abundance (genus Lachnospiraceae UCG001 id.11321)	TRUE
9	7273249	-0.0683706	0.0143691	1.71502e-06	14306	ebi-a-GCST90017025	rs10815577	C	G	NA	Gut microbiota abundance (genus Lachnospiraceae UCG001 id.11321)	TRUE
12	56256262	0.0761893	0.0170127	7.55962e-06	14306	ebi-a-GCST90017025	rs2371284	C	T	NA	Gut microbiota abundance (genus Lachnospiraceae UCG001 id.11321)	TRUE
14	21455973	-0.0681973	0.0149831	6.08597e-06	14306	ebi-a-GCST90017025	rs4981345	T	C	NA	Gut microbiota abundance (genus Lachnospiraceae UCG001 id.11321)	TRUE
16	79092359	0.168045	0.0382637	3.3335e-06	14306	ebi-a-GCST90017025	rs74034332	G	A	NA	Gut microbiota abundance (genus Lachnospiraceae UCG001 id.11321)	TRUE
17	36155074	-0.0816269	0.01838	9.01675e-06	14306	ebi-a-GCST90017025	rs7213933	T	A	NA	Gut microbiota abundance (genus Lachnospiraceae UCG001 id.11321)	TRUE
19	13962924	0.0892098	0.0197665	8.04211e-06	14306	ebi-a-GCST90017025	rs8104225	A	G	NA	Gut microbiota abundance (genus Lachnospiraceae UCG001 id.11321)	TRUE
1	103732214	0.133972	0.0257416	2.09426e-07	14306	ebi-a-GCST90017055	rs12125734	G	T	NA	Gut microbiota abundance (genus Ruminococcaceae UCG004 id.11362)	TRUE
1	18676399	0.078587	0.018003	9.43127e-06	14306	ebi-a-GCST90017055	rs550351	A	C	NA	Gut microbiota abundance (genus Ruminococcaceae UCG004 id.11362)	TRUE
2	239846337	-0.075914	0.0170308	8.1197e-06	14306	ebi-a-GCST90017055	rs7569771	A	G	NA	Gut microbiota abundance (genus Ruminococcaceae UCG004 id.11362)	TRUE
3	197683751	-0.0859927	0.0188671	5.38828e-06	14306	ebi-a-GCST90017055	rs9818949	T	G	NA	Gut microbiota abundance (genus Ruminococcaceae UCG004 id.11362)	TRUE
3	54427795	0.0849743	0.0157451	7.91061e-08	14306	ebi-a-GCST90017055	rs6769553	A	G	NA	Gut microbiota abundance (genus Ruminococcaceae UCG004 id.11362)	TRUE
3	169966722	-0.0757474	0.0162475	4.52054e-06	14306	ebi-a-GCST90017055	rs511258	G	A	NA	Gut microbiota abundance (genus Ruminococcaceae UCG004 id.11362)	TRUE
6	2119329	-0.0797959	0.0177639	6.11575e-06	14306	ebi-a-GCST90017055	rs3800154	A	C	NA	Gut microbiota abundance (genus Ruminococcaceae UCG004 id.11362)	TRUE
6	132887921	-0.0707825	0.0161381	9.18015e-06	14306	ebi-a-GCST90017055	rs11961899	G	A	NA	Gut microbiota abundance (genus Ruminococcaceae UCG004 id.11362)	TRUE
7	24791998	0.0689452	0.0153649	8.19993e-06	14306	ebi-a-GCST90017055	rs2248146	T	C	NA	Gut microbiota abundance (genus Ruminococcaceae UCG004 id.11362)	TRUE
8	139253064	0.116125	0.025946	5.80805e-06	14306	ebi-a-GCST90017055	rs872501	G	A	NA	Gut microbiota abundance (genus Ruminococcaceae UCG004 id.11362)	TRUE
9	7317307	0.095976	0.0214554	7.04482e-06	14306	ebi-a-GCST90017055	rs10976229	T	G	NA	Gut microbiota abundance (genus Ruminococcaceae UCG004 id.11362)	TRUE
11	15771251	-0.0786157	0.0179592	7.09186e-06	14306	ebi-a-GCST90017055	rs7123615	C	G	NA	Gut microbiota abundance (genus Ruminococcaceae UCG004 id.11362)	TRUE
1	109845252	0.070592	0.0157049	5.17285e-06	14306	ebi-a-GCST90017103	rs638542	A	G	NA	Gut microbiota abundance (order Mollicutes RF9 id.11579)	TRUE
1	61850864	-0.103134	0.0241775	8.11204e-06	14306	ebi-a-GCST90017103	rs12566890	T	G	NA	Gut microbiota abundance (order Mollicutes RF9 id.11579)	TRUE
2	177374176	-0.110864	0.0241355	5.26708e-06	14306	ebi-a-GCST90017103	rs62188991	G	C	NA	Gut microbiota abundance (order Mollicutes RF9 id.11579)	TRUE
3	165846506	0.0638979	0.0142685	7.28853e-06	14306	ebi-a-GCST90017103	rs13100746	C	T	NA	Gut microbiota abundance (order Mollicutes RF9 id.11579)	TRUE
3	184193482	0.0626209	0.0141623	9.92865e-06	14306	ebi-a-GCST90017103	rs3932485	C	T	NA	Gut microbiota abundance (order Mollicutes RF9 id.11579)	TRUE
3	3771148	0.0908218	0.0202986	5.15941e-06	14306	ebi-a-GCST90017103	rs76373661	G	A	NA	Gut microbiota abundance (order Mollicutes RF9 id.11579)	TRUE
5	17443654	-0.0657351	0.0138979	2.27206e-06	14306	ebi-a-GCST90017103	rs7706512	A	G	NA	Gut microbiota abundance (order Mollicutes RF9 id.11579)	TRUE
5	176287195	-0.125105	0.0278674	8.6441e-06	14306	ebi-a-GCST90017103	rs10071529	C	G	NA	Gut microbiota abundance (order Mollicutes RF9 id.11579)	TRUE
7	4105705	-0.0869495	0.0194509	9.46891e-06	14306	ebi-a-GCST90017103	rs7801843	A	G	NA	Gut microbiota abundance (order Mollicutes RF9 id.11579)	TRUE
7	82536037	-0.122002	0.0255463	2.15879e-06	14306	ebi-a-GCST90017103	rs17235252	T	C	NA	Gut microbiota abundance (order Mollicutes RF9 id.11579)	TRUE
8	15406830	-0.0772768	0.0172171	6.68852e-06	14306	ebi-a-GCST90017103	rs11779863	G	A	NA	Gut microbiota abundance (order Mollicutes RF9 id.11579)	TRUE
9	116711241	0.0624389	0.0139833	6.73256e-06	14306	ebi-a-GCST90017103	rs7853673	A	G	NA	Gut microbiota abundance (order Mollicutes RF9 id.11579)	TRUE
10	3521459	0.0875451	0.0190685	6.61363e-06	14306	ebi-a-GCST90017103	rs515984	C	T	NA	Gut microbiota abundance (order Mollicutes RF9 id.11579)	TRUE
11	112386785	-0.0656602	0.0147216	7.73286e-06	14306	ebi-a-GCST90017103	rs949341	A	G	NA	Gut microbiota abundance (order Mollicutes RF9 id.11579)	TRUE
14	46519718	0.230767	0.0489701	2.27641e-06	14306	ebi-a-GCST90017103	rs74603314	T	C	NA	Gut microbiota abundance (order Mollicutes RF9 id.11579)	TRUE
22	42741466	-0.0652658	0.0139773	3.09286e-06	14306	ebi-a-GCST90017103	rs739151	G	C	NA	Gut microbiota abundance (order Mollicutes RF9 id.11579)	TRUE
1	214031969	-0.0484566	0.0107934	7.26742e-06	14306	ebi-a-GCST90016940	rs12760724	A	C	NA	Gut microbiota abundance (family Lachnospiraceae id.1987)	TRUE
1	117031337	-0.0515295	0.01067	1.42945e-06	14306	ebi-a-GCST90016940	rs12562372	G	T	NA	Gut microbiota abundance (family Lachnospiraceae id.1987)	TRUE
2	232469722	-0.0993483	0.0218395	8.37067e-06	14306	ebi-a-GCST90016940	rs13005175	G	A	NA	Gut microbiota abundance (family Lachnospiraceae id.1987)	TRUE
4	186906801	0.0493666	0.0107801	5.16952e-06	14306	ebi-a-GCST90016940	rs959845	T	C	NA	Gut microbiota abundance (family Lachnospiraceae id.1987)	TRUE
4	10245354	-0.0585831	0.0128742	3.69556e-06	14306	ebi-a-GCST90016940	rs2159863	A	G	NA	Gut microbiota abundance (family Lachnospiraceae id.1987)	TRUE
5	32348593	-0.160302	0.035832	8.41977e-06	14306	ebi-a-GCST90016940	rs2910921	C	T	NA	Gut microbiota abundance (family Lachnospiraceae id.1987)	TRUE
6	161957425	-0.049227	0.0104894	2.6898e-06	14306	ebi-a-GCST90016940	rs11755180	C	G	NA	Gut microbiota abundance (family Lachnospiraceae id.1987)	TRUE
6	46664437	-0.215114	0.0476778	6.53236e-06	14306	ebi-a-GCST90016940	rs146660815	T	C	NA	Gut microbiota abundance (family Lachnospiraceae id.1987)	TRUE
7	130436459	-0.0500924	0.0105069	1.81844e-06	14306	ebi-a-GCST90016940	rs11979110	T	C	NA	Gut microbiota abundance (family Lachnospiraceae id.1987)	TRUE
9	72179847	-0.0494463	0.0110503	4.26265e-06	14306	ebi-a-GCST90016940	rs11139361	C	T	NA	Gut microbiota abundance (family Lachnospiraceae id.1987)	TRUE
9	133791605	0.0776723	0.0164472	3.01426e-06	14306	ebi-a-GCST90016940	rs79086868	T	C	NA	Gut microbiota abundance (family Lachnospiraceae id.1987)	TRUE
9	100113683	-0.0607481	0.0125216	2.44997e-06	14306	ebi-a-GCST90016940	rs35524804	T	C	NA	Gut microbiota abundance (family Lachnospiraceae id.1987)	TRUE
10	103392503	-0.0503537	0.0112201	6.20326e-06	14306	ebi-a-GCST90016940	rs3127230	C	T	NA	Gut microbiota abundance (family Lachnospiraceae id.1987)	TRUE
13	38004672	-0.0718128	0.017462	9.57767e-06	14306	ebi-a-GCST90016940	rs11841382	G	T	NA	Gut microbiota abundance (family Lachnospiraceae id.1987)	TRUE
16	76559184	-0.125721	0.0245233	2.83596e-07	14306	ebi-a-GCST90016940	rs9929145	G	A	NA	Gut microbiota abundance (family Lachnospiraceae id.1987)	TRUE
17	80469064	0.0549584	0.0117086	2.41835e-06	14306	ebi-a-GCST90016940	rs112040820	A	G	NA	Gut microbiota abundance (family Lachnospiraceae id.1987)	TRUE
19	29408858	0.0503142	0.0112482	5.35895e-06	14306	ebi-a-GCST90016940	rs7359994	C	T	NA	Gut microbiota abundance (family Lachnospiraceae id.1987)	TRUE
19	13425799	0.0661701	0.014851	7.58351e-06	14306	ebi-a-GCST90016940	rs10402491	C	T	NA	Gut microbiota abundance (family Lachnospiraceae id.1987)	TRUE
20	36876868	0.0501415	0.0112157	7.28836e-06	14306	ebi-a-GCST90016940	rs1205443	A	G	NA	Gut microbiota abundance (family Lachnospiraceae id.1987)	TRUE
1	18501459	-0.183147	0.038148	1.27809e-06	14306	ebi-a-GCST90017030	rs16861661	G	A	NA	Gut microbiota abundance (genus Lactobacillus id.1837)	TRUE
2	28903275	-0.0852686	0.0176504	1.59199e-06	14306	ebi-a-GCST90017030	rs11674854	C	T	NA	Gut microbiota abundance (genus Lactobacillus id.1837)	TRUE
2	199312684	-0.0805447	0.0177429	8.96314e-06	14306	ebi-a-GCST90017030	rs12693845	C	T	NA	Gut microbiota abundance (genus Lactobacillus id.1837)	TRUE
2	135755629	0.0804001	0.0178207	4.93106e-06	14306	ebi-a-GCST90017030	rs1530559	G	A	NA	Gut microbiota abundance (genus Lactobacillus id.1837)	TRUE
3	173151665	-0.219886	0.0475759	7.32706e-06	14306	ebi-a-GCST90017030	rs77478751	A	G	NA	Gut microbiota abundance (genus Lactobacillus id.1837)	TRUE
4	109896462	0.187692	0.0394585	2.24383e-06	14306	ebi-a-GCST90017030	rs62314653	C	A	NA	Gut microbiota abundance (genus Lactobacillus id.1837)	TRUE
6	151027636	0.139784	0.0310414	6.83439e-06	14306	ebi-a-GCST90017030	rs75127669	C	A	NA	Gut microbiota abundance (genus Lactobacillus id.1837)	TRUE
8	69010103	-0.079195	0.0171791	4.24766e-06	14306	ebi-a-GCST90017030	rs768253	T	G	NA	Gut microbiota abundance (genus Lactobacillus id.1837)	TRUE
13	23834968	-0.107134	0.0221883	3.12097e-06	14306	ebi-a-GCST90017030	rs7399658	G	A	NA	Gut microbiota abundance (genus Lactobacillus id.1837)	TRUE
16	73890910	0.0815092	0.0169441	1.40618e-06	14306	ebi-a-GCST90017030	rs328312	T	A	NA	Gut microbiota abundance (genus Lactobacillus id.1837)	TRUE
19	6928017	0.0985077	0.0203229	9.71673e-07	14306	ebi-a-GCST90017030	rs921925	A	C	NA	Gut microbiota abundance (genus Lactobacillus id.1837)	TRUE
20	54192992	-0.0801344	0.017149	3.29041e-06	14306	ebi-a-GCST90017030	rs6092149	A	T	NA	Gut microbiota abundance (genus Lactobacillus id.1837)	TRUE
1	61850864	-0.101147	0.0230978	3.65098e-06	14306	ebi-a-GCST90017117	rs12566890	T	G	NA	Gut microbiota abundance (phylum Tenericutes id.3919)	TRUE
1	109965986	0.0681052	0.0149061	4.2335e-06	14306	ebi-a-GCST90017117	rs3768491	G	A	NA	Gut microbiota abundance (phylum Tenericutes id.3919)	TRUE
2	157532549	0.074438	0.0153389	9.56577e-07	14306	ebi-a-GCST90017117	rs11890098	A	G	NA	Gut microbiota abundance (phylum Tenericutes id.3919)	TRUE
7	79490250	0.0944239	0.0211806	8.39499e-06	14306	ebi-a-GCST90017117	rs2464826	A	C	NA	Gut microbiota abundance (phylum Tenericutes id.3919)	TRUE
8	59440824	0.0769142	0.0153953	1.09001e-06	14306	ebi-a-GCST90017117	rs10108398	G	A	NA	Gut microbiota abundance (phylum Tenericutes id.3919)	TRUE
11	47103877	-0.0841852	0.0178119	3.25792e-06	14306	ebi-a-GCST90017117	rs72901605	T	C	NA	Gut microbiota abundance (phylum Tenericutes id.3919)	TRUE
11	108439087	-0.108283	0.0237289	5.87611e-06	14306	ebi-a-GCST90017117	rs78169027	A	G	NA	Gut microbiota abundance (phylum Tenericutes id.3919)	TRUE
13	73170489	0.0819606	0.0181628	7.26993e-06	14306	ebi-a-GCST90017117	rs4885016	C	T	NA	Gut microbiota abundance (phylum Tenericutes id.3919)	TRUE
14	46519718	0.221639	0.0462918	1.5569e-06	14306	ebi-a-GCST90017117	rs74603314	T	C	NA	Gut microbiota abundance (phylum Tenericutes id.3919)	TRUE
14	97159674	0.06099	0.0135623	6.60861e-06	14306	ebi-a-GCST90017117	rs17214486	C	A	NA	Gut microbiota abundance (phylum Tenericutes id.3919)	TRUE
15	95309676	0.0820873	0.0188312	8.07402e-06	14306	ebi-a-GCST90017117	rs28537087	G	A	NA	Gut microbiota abundance (phylum Tenericutes id.3919)	TRUE
20	16259524	-0.114937	0.0248606	4.55481e-06	14306	ebi-a-GCST90017117	rs6043847	T	C	NA	Gut microbiota abundance (phylum Tenericutes id.3919)	TRUE
2	68086034	-0.0770689	0.0187079	9.25977e-06	14306	ebi-a-GCST90017116	rs11126162	T	C	NA	Gut microbiota abundance (phylum Proteobacteria id.2375)	TRUE
2	124872681	0.0498267	0.011138	6.30667e-06	14306	ebi-a-GCST90017116	rs12467198	C	T	NA	Gut microbiota abundance (phylum Proteobacteria id.2375)	TRUE
2	52053891	0.0849594	0.0187782	8.08593e-06	14306	ebi-a-GCST90017116	rs6707783	C	T	NA	Gut microbiota abundance (phylum Proteobacteria id.2375)	TRUE
3	66318042	-0.0803778	0.0157851	3.67959e-07	14306	ebi-a-GCST90017116	rs922773	C	T	NA	Gut microbiota abundance (phylum Proteobacteria id.2375)	TRUE
3	53720793	-0.0519289	0.0115246	6.90415e-06	14306	ebi-a-GCST90017116	rs11715072	G	A	NA	Gut microbiota abundance (phylum Proteobacteria id.2375)	TRUE
7	134388240	0.0502281	0.0108968	4.26914e-06	14306	ebi-a-GCST90017116	rs2347697	G	T	NA	Gut microbiota abundance (phylum Proteobacteria id.2375)	TRUE
8	89541526	0.0951285	0.0216921	9.2506e-06	14306	ebi-a-GCST90017116	rs74757828	A	T	NA	Gut microbiota abundance (phylum Proteobacteria id.2375)	TRUE
10	13841631	0.141726	0.0309242	7.18092e-06	14306	ebi-a-GCST90017116	rs72771021	C	T	NA	Gut microbiota abundance (phylum Proteobacteria id.2375)	TRUE
10	119247234	0.125578	0.0258034	7.4681e-07	14306	ebi-a-GCST90017116	rs2532663	A	G	NA	Gut microbiota abundance (phylum Proteobacteria id.2375)	TRUE
11	123997498	0.0491248	0.010824	8.71907e-06	14306	ebi-a-GCST90017116	rs10750258	C	A	NA	Gut microbiota abundance (phylum Proteobacteria id.2375)	TRUE
12	130331764	-0.0668162	0.0153387	9.9901e-06	14306	ebi-a-GCST90017116	rs4340090	C	T	NA	Gut microbiota abundance (phylum Proteobacteria id.2375)	TRUE
17	68347701	0.0517269	0.0112854	4.83905e-06	14306	ebi-a-GCST90017116	rs312757	G	C	NA	Gut microbiota abundance (phylum Proteobacteria id.2375)	TRUE
19	43505320	0.0511615	0.0106407	1.54085e-06	14306	ebi-a-GCST90017116	rs12150865	C	T	NA	Gut microbiota abundance (phylum Proteobacteria id.2375)	TRUE
22	20301800	0.0474614	0.0105645	6.94656e-06	14306	ebi-a-GCST90017116	rs3890996	G	T	NA	Gut microbiota abundance (phylum Proteobacteria id.2375)	TRUE
1	171903885	-0.0875276	0.0196779	5.08124e-06	14306	ebi-a-GCST90017047	rs16843578	C	T	NA	Gut microbiota abundance (genus Romboutsia id.11347)	TRUE
2	16066705	-0.129578	0.0280454	6.70795e-06	14306	ebi-a-GCST90017047	rs75987356	G	A	NA	Gut microbiota abundance (genus Romboutsia id.11347)	TRUE
5	57229635	-0.131039	0.0293815	7.95848e-06	14306	ebi-a-GCST90017047	rs114398731	G	C	NA	Gut microbiota abundance (genus Romboutsia id.11347)	TRUE
6	135411737	0.0722815	0.0162353	9.38469e-06	14306	ebi-a-GCST90017047	rs9389266	T	G	NA	Gut microbiota abundance (genus Romboutsia id.11347)	TRUE
7	106406824	-0.214911	0.0474739	8.52236e-06	14306	ebi-a-GCST90017047	rs28603357	T	C	NA	Gut microbiota abundance (genus Romboutsia id.11347)	TRUE
7	78136725	-0.0550261	0.0120835	5.87665e-06	14306	ebi-a-GCST90017047	rs34302036	G	A	NA	Gut microbiota abundance (genus Romboutsia id.11347)	TRUE
7	145760298	-0.0710048	0.0156654	4.65833e-06	14306	ebi-a-GCST90017047	rs62504452	A	G	NA	Gut microbiota abundance (genus Romboutsia id.11347)	TRUE
7	5319387	-0.0622202	0.0127675	1.17009e-06	14306	ebi-a-GCST90017047	rs10279978	A	G	NA	Gut microbiota abundance (genus Romboutsia id.11347)	TRUE
8	5088054	-0.190644	0.0421065	5.06559e-06	14306	ebi-a-GCST90017047	rs75200530	T	G	NA	Gut microbiota abundance (genus Romboutsia id.11347)	TRUE
10	17019559	0.092888	0.0171454	3.99595e-08	14306	ebi-a-GCST90017047	rs61841503	G	A	NA	Gut microbiota abundance (genus Romboutsia id.11347)	TRUE
11	133834657	0.0919112	0.0205738	6.98361e-06	14306	ebi-a-GCST90017047	rs7109293	A	G	NA	Gut microbiota abundance (genus Romboutsia id.11347)	TRUE
11	99665050	-0.0726779	0.0158263	6.48649e-06	14306	ebi-a-GCST90017047	rs11221428	T	C	NA	Gut microbiota abundance (genus Romboutsia id.11347)	TRUE
13	88725540	-0.094406	0.0208544	7.3697e-06	14306	ebi-a-GCST90017047	rs77702691	A	G	NA	Gut microbiota abundance (genus Romboutsia id.11347)	TRUE
13	32720756	0.0580018	0.0127495	5.75692e-06	14306	ebi-a-GCST90017047	rs9567264	C	T	NA	Gut microbiota abundance (genus Romboutsia id.11347)	TRUE
1	50088819	-0.0621452	0.0119266	1.28493e-07	14306	ebi-a-GCST90016956	rs12741784	C	T	NA	Gut microbiota abundance (family Veillonellaceae id.2172)	TRUE
1	244391618	-0.0534397	0.0118254	8.67981e-06	14306	ebi-a-GCST90016956	rs6692542	G	A	NA	Gut microbiota abundance (family Veillonellaceae id.2172)	TRUE
4	46366067	0.0514024	0.0112125	4.50671e-06	14306	ebi-a-GCST90016956	rs1442060	A	G	NA	Gut microbiota abundance (family Veillonellaceae id.2172)	TRUE
4	23317124	0.0526752	0.0114886	4.63554e-06	14306	ebi-a-GCST90016956	rs2175069	G	A	NA	Gut microbiota abundance (family Veillonellaceae id.2172)	TRUE
5	132646303	0.208096	0.0453999	4.52856e-06	14306	ebi-a-GCST90016956	rs12186441	G	A	NA	Gut microbiota abundance (family Veillonellaceae id.2172)	TRUE
5	38348199	-0.083617	0.0187159	7.88515e-06	14306	ebi-a-GCST90016956	rs2561116	T	G	NA	Gut microbiota abundance (family Veillonellaceae id.2172)	TRUE
6	75534152	-0.0638696	0.0141765	5.47621e-06	14306	ebi-a-GCST90016956	rs6909981	C	T	NA	Gut microbiota abundance (family Veillonellaceae id.2172)	TRUE
6	139188534	0.202367	0.0464388	6.74544e-06	14306	ebi-a-GCST90016956	rs61264131	A	C	NA	Gut microbiota abundance (family Veillonellaceae id.2172)	TRUE
6	92380922	-0.0509102	0.0113253	8.48887e-06	14306	ebi-a-GCST90016956	rs9345168	A	C	NA	Gut microbiota abundance (family Veillonellaceae id.2172)	TRUE
7	21637810	0.055301	0.0117654	2.57365e-06	14306	ebi-a-GCST90016956	rs12668619	A	G	NA	Gut microbiota abundance (family Veillonellaceae id.2172)	TRUE
8	138319508	-0.050942	0.0114921	7.45006e-06	14306	ebi-a-GCST90016956	rs4263802	A	G	NA	Gut microbiota abundance (family Veillonellaceae id.2172)	TRUE
8	41231597	0.0520689	0.0115656	7.34903e-06	14306	ebi-a-GCST90016956	rs1447205	C	G	NA	Gut microbiota abundance (family Veillonellaceae id.2172)	TRUE
13	101617913	-0.0703773	0.0156855	7.19234e-06	14306	ebi-a-GCST90016956	rs75768969	C	G	NA	Gut microbiota abundance (family Veillonellaceae id.2172)	TRUE
13	61597625	-0.253809	0.0539169	6.19028e-06	14306	ebi-a-GCST90016956	rs114889439	A	G	NA	Gut microbiota abundance (family Veillonellaceae id.2172)	TRUE
13	38326692	0.100666	0.0207016	1.57688e-06	14306	ebi-a-GCST90016956	rs79535861	A	C	NA	Gut microbiota abundance (family Veillonellaceae id.2172)	TRUE
13	78785141	-0.0904972	0.0200428	5.26926e-06	14306	ebi-a-GCST90016956	rs2585520	G	T	NA	Gut microbiota abundance (family Veillonellaceae id.2172)	TRUE
14	102897930	-0.0867108	0.0180573	1.72926e-06	14306	ebi-a-GCST90016956	rs111810795	C	T	NA	Gut microbiota abundance (family Veillonellaceae id.2172)	TRUE
15	78546996	0.0554965	0.0119467	3.73474e-06	14306	ebi-a-GCST90016956	rs4461038	G	A	NA	Gut microbiota abundance (family Veillonellaceae id.2172)	TRUE
18	462180	0.0587799	0.0128297	4.49345e-06	14306	ebi-a-GCST90016956	rs4797169	T	C	NA	Gut microbiota abundance (family Veillonellaceae id.2172)	TRUE
18	30208691	0.0818934	0.018245	9.25273e-06	14306	ebi-a-GCST90016956	rs1693340	T	C	NA	Gut microbiota abundance (family Veillonellaceae id.2172)	TRUE
21	35576123	0.0503337	0.0113763	9.2538e-06	14306	ebi-a-GCST90016956	rs11700976	C	A	NA	Gut microbiota abundance (family Veillonellaceae id.2172)	TRUE
1	85585609	-0.10452	0.0225521	9.75708e-06	14306	ebi-a-GCST90017039	rs6657302	T	C	NA	Gut microbiota abundance (genus Parabacteroides id.954)	TRUE
2	38037203	-0.0715594	0.0156668	8.83385e-06	14306	ebi-a-GCST90017039	rs72893646	A	T	NA	Gut microbiota abundance (genus Parabacteroides id.954)	TRUE
3	191572365	0.10308	0.0222736	1.93059e-06	14306	ebi-a-GCST90017039	rs115602804	G	A	NA	Gut microbiota abundance (genus Parabacteroides id.954)	TRUE
3	52354847	0.186478	0.0405199	5.65484e-06	14306	ebi-a-GCST90017039	rs114567323	T	C	NA	Gut microbiota abundance (genus Parabacteroides id.954)	TRUE
5	169360155	0.0558784	0.0116625	1.71325e-06	14306	ebi-a-GCST90017039	rs3860755	G	C	NA	Gut microbiota abundance (genus Parabacteroides id.954)	TRUE
6	165969505	0.162824	0.0381863	8.86584e-06	14306	ebi-a-GCST90017039	rs11965579	G	C	NA	Gut microbiota abundance (genus Parabacteroides id.954)	TRUE
6	47368687	-0.0761961	0.0157042	1.93143e-06	14306	ebi-a-GCST90017039	rs4236095	A	G	NA	Gut microbiota abundance (genus Parabacteroides id.954)	TRUE
9	2217340	-0.0702667	0.0142249	5.7069e-07	14306	ebi-a-GCST90017039	rs60884758	C	T	NA	Gut microbiota abundance (genus Parabacteroides id.954)	TRUE
12	56396953	0.0888832	0.0200902	8.53631e-06	14306	ebi-a-GCST90017039	rs7298818	C	T	NA	Gut microbiota abundance (genus Parabacteroides id.954)	TRUE
16	7045276	-0.0500303	0.0111459	7.27411e-06	14306	ebi-a-GCST90017039	rs17141986	C	G	NA	Gut microbiota abundance (genus Parabacteroides id.954)	TRUE
1	203308383	-0.0732697	0.0150964	2.39651e-06	14306	ebi-a-GCST90016935	rs16851319	G	C	NA	Gut microbiota abundance (family Desulfovibrionaceae id.3169)	TRUE
1	203991605	-0.114231	0.0253568	1.5639e-06	14306	ebi-a-GCST90016935	rs2692012	G	A	NA	Gut microbiota abundance (family Desulfovibrionaceae id.3169)	TRUE
2	233929283	-0.0525838	0.0115757	6.78141e-06	14306	ebi-a-GCST90016935	rs3935584	C	T	NA	Gut microbiota abundance (family Desulfovibrionaceae id.3169)	TRUE
8	57865378	-0.0770089	0.017089	9.60882e-06	14306	ebi-a-GCST90016935	rs72647048	T	C	NA	Gut microbiota abundance (family Desulfovibrionaceae id.3169)	TRUE
9	81834426	-0.0729251	0.0154381	2.09677e-06	14306	ebi-a-GCST90016935	rs17791387	A	G	NA	Gut microbiota abundance (family Desulfovibrionaceae id.3169)	TRUE
9	15269705	0.211435	0.0456962	2.81877e-06	14306	ebi-a-GCST90016935	rs112381107	C	T	NA	Gut microbiota abundance (family Desulfovibrionaceae id.3169)	TRUE
10	11855599	0.0555931	0.0117493	2.49701e-06	14306	ebi-a-GCST90016935	rs11599763	C	T	NA	Gut microbiota abundance (family Desulfovibrionaceae id.3169)	TRUE
15	96159374	-0.0574455	0.0129468	7.34345e-06	14306	ebi-a-GCST90016935	rs7164160	A	T	NA	Gut microbiota abundance (family Desulfovibrionaceae id.3169)	TRUE
16	71541641	-0.0541732	0.0117819	4.48477e-06	14306	ebi-a-GCST90016935	rs9928243	C	A	NA	Gut microbiota abundance (family Desulfovibrionaceae id.3169)	TRUE
17	2856662	-0.0943381	0.020138	3.16046e-06	14306	ebi-a-GCST90016935	rs4506934	C	T	NA	Gut microbiota abundance (family Desulfovibrionaceae id.3169)	TRUE
20	33694801	0.0834742	0.0166111	2.69911e-07	14306	ebi-a-GCST90016935	rs6058181	C	T	NA	Gut microbiota abundance (family Desulfovibrionaceae id.3169)	TRUE
21	45064961	0.0571419	0.012423	3.82375e-06	14306	ebi-a-GCST90016935	rs2838334	G	A	NA	Gut microbiota abundance (family Desulfovibrionaceae id.3169)	TRUE
1	85205632	-0.138357	0.0295185	3.41374e-06	14306	ebi-a-GCST90016934	rs9725395	A	G	NA	Gut microbiota abundance (family Defluviitaleaceae id.1924)	TRUE
1	118723685	-0.0801923	0.0167061	1.692e-06	14306	ebi-a-GCST90016934	rs1582238	C	T	NA	Gut microbiota abundance (family Defluviitaleaceae id.1924)	TRUE
3	72207794	0.0977203	0.0197033	9.42193e-07	14306	ebi-a-GCST90016934	rs4677103	A	G	NA	Gut microbiota abundance (family Defluviitaleaceae id.1924)	TRUE
4	122202910	-0.134314	0.0292201	4.58121e-06	14306	ebi-a-GCST90016934	rs17051335	C	T	NA	Gut microbiota abundance (family Defluviitaleaceae id.1924)	TRUE
4	147414743	-0.149751	0.0293415	2.75778e-07	14306	ebi-a-GCST90016934	rs72731813	C	T	NA	Gut microbiota abundance (family Defluviitaleaceae id.1924)	TRUE
7	79734541	0.107106	0.0238173	5.56327e-06	14306	ebi-a-GCST90016934	rs28696126	T	A	NA	Gut microbiota abundance (family Defluviitaleaceae id.1924)	TRUE
9	93331308	0.123954	0.0289814	9.48135e-06	14306	ebi-a-GCST90016934	rs540220	C	T	NA	Gut microbiota abundance (family Defluviitaleaceae id.1924)	TRUE
9	8786663	0.110761	0.0232545	2.7503e-06	14306	ebi-a-GCST90016934	rs112893842	T	C	NA	Gut microbiota abundance (family Defluviitaleaceae id.1924)	TRUE
10	66407366	-0.0708803	0.0156121	5.86017e-06	14306	ebi-a-GCST90016934	rs4344384	T	G	NA	Gut microbiota abundance (family Defluviitaleaceae id.1924)	TRUE
18	59026148	0.070223	0.0156601	7.85905e-06	14306	ebi-a-GCST90016934	rs1908593	T	C	NA	Gut microbiota abundance (family Defluviitaleaceae id.1924)	TRUE
21	41811003	0.177314	0.0361844	1.40608e-06	14306	ebi-a-GCST90016934	rs55658617	T	C	NA	Gut microbiota abundance (family Defluviitaleaceae id.1924)	TRUE
22	24804081	0.139014	0.0299429	4.60829e-06	14306	ebi-a-GCST90016934	rs9608282	T	G	NA	Gut microbiota abundance (family Defluviitaleaceae id.1924)	TRUE
1	240929774	0.0915257	0.0207306	8.37394e-06	14306	ebi-a-GCST90016947	rs35961441	A	C	NA	Gut microbiota abundance (family Porphyromonadaceae id.943)	TRUE
3	62035586	-0.059133	0.0122235	1.79349e-06	14306	ebi-a-GCST90016947	rs17065783	A	G	NA	Gut microbiota abundance (family Porphyromonadaceae id.943)	TRUE
3	189854046	-0.0581896	0.0121147	2.19498e-06	14306	ebi-a-GCST90016947	rs3111851	G	C	NA	Gut microbiota abundance (family Porphyromonadaceae id.943)	TRUE
4	149825977	-0.0527939	0.0117499	9.59798e-06	14306	ebi-a-GCST90016947	rs864093	A	C	NA	Gut microbiota abundance (family Porphyromonadaceae id.943)	TRUE
7	69251692	0.0718149	0.0150724	2.44478e-06	14306	ebi-a-GCST90016947	rs6953849	A	G	NA	Gut microbiota abundance (family Porphyromonadaceae id.943)	TRUE
9	138076081	0.055316	0.012085	4.31062e-06	14306	ebi-a-GCST90016947	rs10858364	G	T	NA	Gut microbiota abundance (family Porphyromonadaceae id.943)	TRUE
9	2233969	-0.0737324	0.014259	1.32425e-07	14306	ebi-a-GCST90016947	rs10119172	C	G	NA	Gut microbiota abundance (family Porphyromonadaceae id.943)	TRUE
10	71571863	0.052368	0.0118814	8.70362e-06	14306	ebi-a-GCST90016947	rs10762312	A	G	NA	Gut microbiota abundance (family Porphyromonadaceae id.943)	TRUE
13	23531802	-0.103842	0.0237355	8.04896e-06	14306	ebi-a-GCST90016947	rs7330827	T	C	NA	Gut microbiota abundance (family Porphyromonadaceae id.943)	TRUE
14	63386516	-0.0485289	0.0109284	8.9454e-06	14306	ebi-a-GCST90016947	rs1980561	A	G	NA	Gut microbiota abundance (family Porphyromonadaceae id.943)	TRUE
17	63750903	-0.0473576	0.010602	7.90988e-06	14306	ebi-a-GCST90016947	rs35233670	T	C	NA	Gut microbiota abundance (family Porphyromonadaceae id.943)	TRUE
1	240503826	0.11614	0.0243083	1.66054e-06	14306	ebi-a-GCST90017050	rs79968172	G	A	NA	Gut microbiota abundance (genus Ruminiclostridium6 id.11356)	TRUE
2	5548605	0.0554234	0.0125423	8.57946e-06	14306	ebi-a-GCST90017050	rs792058	G	A	NA	Gut microbiota abundance (genus Ruminiclostridium6 id.11356)	TRUE
4	36478011	0.0720077	0.0165387	8.99146e-06	14306	ebi-a-GCST90017050	rs35362464	C	A	NA	Gut microbiota abundance (genus Ruminiclostridium6 id.11356)	TRUE
7	101271282	0.058665	0.013208	7.28887e-06	14306	ebi-a-GCST90017050	rs73176030	T	C	NA	Gut microbiota abundance (genus Ruminiclostridium6 id.11356)	TRUE
8	79766499	0.0625299	0.0137876	4.64836e-06	14306	ebi-a-GCST90017050	rs11992182	A	C	NA	Gut microbiota abundance (genus Ruminiclostridium6 id.11356)	TRUE
10	128214403	-0.166823	0.0376681	9.15946e-06	14306	ebi-a-GCST90017050	rs116969552	A	G	NA	Gut microbiota abundance (genus Ruminiclostridium6 id.11356)	TRUE
10	132651293	-0.097606	0.0216072	3.47144e-06	14306	ebi-a-GCST90017050	rs10829821	T	C	NA	Gut microbiota abundance (genus Ruminiclostridium6 id.11356)	TRUE
11	86179076	0.13498	0.0310715	3.39414e-06	14306	ebi-a-GCST90017050	rs663262	C	T	NA	Gut microbiota abundance (genus Ruminiclostridium6 id.11356)	TRUE
11	40289063	0.0736533	0.0153163	1.29587e-06	14306	ebi-a-GCST90017050	rs77193512	A	G	NA	Gut microbiota abundance (genus Ruminiclostridium6 id.11356)	TRUE
13	111703249	-0.0804138	0.0176692	7.10133e-06	14306	ebi-a-GCST90017050	rs9555756	A	C	NA	Gut microbiota abundance (genus Ruminiclostridium6 id.11356)	TRUE
14	20954661	0.0999189	0.0197169	2.53653e-07	14306	ebi-a-GCST90017050	rs1756364	G	T	NA	Gut microbiota abundance (genus Ruminiclostridium6 id.11356)	TRUE
14	56938952	0.200894	0.0406434	1.07696e-06	14306	ebi-a-GCST90017050	rs71414120	T	G	NA	Gut microbiota abundance (genus Ruminiclostridium6 id.11356)	TRUE
15	61047117	-0.105422	0.0237274	9.11612e-06	14306	ebi-a-GCST90017050	rs1871858	C	G	NA	Gut microbiota abundance (genus Ruminiclostridium6 id.11356)	TRUE
16	72136154	0.15913	0.0322283	1.08648e-06	14306	ebi-a-GCST90017050	rs61060922	T	G	NA	Gut microbiota abundance (genus Ruminiclostridium6 id.11356)	TRUE
18	76018244	0.135604	0.0295174	4.9537e-06	14306	ebi-a-GCST90017050	rs72991535	T	G	NA	Gut microbiota abundance (genus Ruminiclostridium6 id.11356)	TRUE
19	10115515	0.118994	0.026487	9.30208e-06	14306	ebi-a-GCST90017050	rs67479537	T	C	NA	Gut microbiota abundance (genus Ruminiclostridium6 id.11356)	TRUE
19	49209339	0.0554866	0.0122755	6.40206e-06	14306	ebi-a-GCST90017050	rs2548459	C	T	NA	Gut microbiota abundance (genus Ruminiclostridium6 id.11356)	TRUE
1	9136139	-0.188618	0.0403613	3.34649e-06	14306	ebi-a-GCST90016990	rs112205261	T	C	NA	Gut microbiota abundance (genus Eggerthella id.819)	TRUE
2	45453805	0.107774	0.0236527	4.1759e-06	14306	ebi-a-GCST90016990	rs3851328	G	T	NA	Gut microbiota abundance (genus Eggerthella id.819)	TRUE
2	141337454	-0.0879736	0.0197127	8.37124e-06	14306	ebi-a-GCST90016990	rs6430926	T	C	NA	Gut microbiota abundance (genus Eggerthella id.819)	TRUE
3	20807454	-0.121331	0.0272024	7.61921e-06	14306	ebi-a-GCST90016990	rs13070736	A	C	NA	Gut microbiota abundance (genus Eggerthella id.819)	TRUE
4	70483957	-0.093486	0.0210208	9.02714e-06	14306	ebi-a-GCST90016990	rs2877457	G	A	NA	Gut microbiota abundance (genus Eggerthella id.819)	TRUE
7	38335954	-0.0980582	0.0197653	7.36207e-07	14306	ebi-a-GCST90016990	rs2240838	G	A	NA	Gut microbiota abundance (genus Eggerthella id.819)	TRUE
11	102461599	-0.0907728	0.0198096	5.2313e-06	14306	ebi-a-GCST90016990	rs1784446	A	G	NA	Gut microbiota abundance (genus Eggerthella id.819)	TRUE
15	65691324	0.108495	0.0245457	8.94211e-06	14306	ebi-a-GCST90016990	rs67490567	T	C	NA	Gut microbiota abundance (genus Eggerthella id.819)	TRUE
17	17098213	-0.110522	0.0247653	5.71465e-06	14306	ebi-a-GCST90016990	rs4985746	A	G	NA	Gut microbiota abundance (genus Eggerthella id.819)	TRUE
20	55647869	0.175349	0.0378576	4.8257e-06	14306	ebi-a-GCST90016990	rs76663501	C	T	NA	Gut microbiota abundance (genus Eggerthella id.819)	TRUE
21	29778032	-0.102572	0.0221108	3.88893e-06	14306	ebi-a-GCST90016990	rs2223081	A	G	NA	Gut microbiota abundance (genus Eggerthella id.819)	TRUE
2	200778866	-0.0911053	0.0202239	7.73891e-06	14306	ebi-a-GCST90017104	rs166849	A	G	NA	Gut microbiota abundance (order NB1n id.3953)	TRUE
2	234081324	0.0929494	0.0201348	3.96826e-06	14306	ebi-a-GCST90017104	rs13385922	T	C	NA	Gut microbiota abundance (order NB1n id.3953)	TRUE
5	10737802	-0.0988612	0.0209676	2.61993e-06	14306	ebi-a-GCST90017104	rs267959	G	A	NA	Gut microbiota abundance (order NB1n id.3953)	TRUE
6	68934648	0.115344	0.0236958	1.40637e-06	14306	ebi-a-GCST90017104	rs13219468	G	C	NA	Gut microbiota abundance (order NB1n id.3953)	TRUE
7	1321675	0.108934	0.021177	2.59579e-07	14306	ebi-a-GCST90017104	rs60583455	T	C	NA	Gut microbiota abundance (order NB1n id.3953)	TRUE
8	18229020	0.10212	0.0198947	3.17424e-07	14306	ebi-a-GCST90017104	rs2172426	T	C	NA	Gut microbiota abundance (order NB1n id.3953)	TRUE
10	127094261	-0.109245	0.0236201	4.32136e-06	14306	ebi-a-GCST90017104	rs55921101	A	T	NA	Gut microbiota abundance (order NB1n id.3953)	TRUE
10	98619568	-0.223071	0.0470232	3.38821e-06	14306	ebi-a-GCST90017104	rs7911787	G	T	NA	Gut microbiota abundance (order NB1n id.3953)	TRUE
10	2095726	0.104201	0.0206737	6.62796e-07	14306	ebi-a-GCST90017104	rs11251024	G	A	NA	Gut microbiota abundance (order NB1n id.3953)	TRUE
11	91589600	-0.154539	0.0326288	3.30583e-06	14306	ebi-a-GCST90017104	rs11606187	A	G	NA	Gut microbiota abundance (order NB1n id.3953)	TRUE
13	70306831	0.0990709	0.0218149	6.52334e-06	14306	ebi-a-GCST90017104	rs9542068	T	C	NA	Gut microbiota abundance (order NB1n id.3953)	TRUE
14	39425971	0.172322	0.0370028	3.79577e-06	14306	ebi-a-GCST90017104	rs72671304	T	C	NA	Gut microbiota abundance (order NB1n id.3953)	TRUE
15	97318671	-0.0962425	0.0213842	7.10461e-06	14306	ebi-a-GCST90017104	rs60775321	T	C	NA	Gut microbiota abundance (order NB1n id.3953)	TRUE
15	81694972	-0.149188	0.0320662	4.28134e-06	14306	ebi-a-GCST90017104	rs4383094	C	T	NA	Gut microbiota abundance (order NB1n id.3953)	TRUE
19	887824	0.0908335	0.0209434	6.84353e-06	14306	ebi-a-GCST90017104	rs2930903	C	G	NA	Gut microbiota abundance (order NB1n id.3953)	TRUE
20	3405239	-0.159135	0.0351904	7.36326e-06	14306	ebi-a-GCST90017104	rs8126061	T	C	NA	Gut microbiota abundance (order NB1n id.3953)	TRUE
2	230943099	0.0958394	0.0214723	8.74017e-06	14306	ebi-a-GCST90016978	rs62190261	A	C	NA	Gut microbiota abundance (genus Christensenellaceae R 7group id.11283)	TRUE
4	156131004	-0.0551969	0.0122069	6.50744e-06	14306	ebi-a-GCST90016978	rs10461257	A	G	NA	Gut microbiota abundance (genus Christensenellaceae R 7group id.11283)	TRUE
5	29352420	0.121547	0.0270977	9.41803e-06	14306	ebi-a-GCST90016978	rs79150079	C	A	NA	Gut microbiota abundance (genus Christensenellaceae R 7group id.11283)	TRUE
7	118096925	0.114108	0.0251983	3.25364e-06	14306	ebi-a-GCST90016978	rs62467127	C	T	NA	Gut microbiota abundance (genus Christensenellaceae R 7group id.11283)	TRUE
9	83043376	0.0514099	0.011136	3.96862e-06	14306	ebi-a-GCST90016978	rs892686	A	G	NA	Gut microbiota abundance (genus Christensenellaceae R 7group id.11283)	TRUE
10	126448374	0.124992	0.0274797	5.60673e-06	14306	ebi-a-GCST90016978	rs78521377	C	T	NA	Gut microbiota abundance (genus Christensenellaceae R 7group id.11283)	TRUE
18	67555560	-0.0904325	0.0204253	3.34033e-06	14306	ebi-a-GCST90016978	rs17081797	A	G	NA	Gut microbiota abundance (genus Christensenellaceae R 7group id.11283)	TRUE
18	1779609	-0.0862164	0.0194354	8.45766e-06	14306	ebi-a-GCST90016978	rs73952017	C	T	NA	Gut microbiota abundance (genus Christensenellaceae R 7group id.11283)	TRUE
19	35883736	0.049815	0.0110787	7.13181e-06	14306	ebi-a-GCST90016978	rs60954665	T	G	NA	Gut microbiota abundance (genus Christensenellaceae R 7group id.11283)	TRUE
19	34076956	0.0580248	0.0117185	7.00697e-07	14306	ebi-a-GCST90016978	rs999354	T	A	NA	Gut microbiota abundance (genus Christensenellaceae R 7group id.11283)	TRUE
19	49279227	-0.0828853	0.0179623	5.66709e-06	14306	ebi-a-GCST90016978	rs62132810	A	G	NA	Gut microbiota abundance (genus Christensenellaceae R 7group id.11283)	TRUE
1	14238305	-0.0692742	0.0148866	3.55435e-06	14306	ebi-a-GCST90016909	rs10803434	A	T	NA	Gut microbiota abundance (class Alphaproteobacteria id.2379)	TRUE
2	169033340	0.133271	0.0267738	5.09143e-07	14306	ebi-a-GCST90016909	rs76784716	A	G	NA	Gut microbiota abundance (class Alphaproteobacteria id.2379)	TRUE
2	75630344	-0.0705145	0.0157564	7.37921e-06	14306	ebi-a-GCST90016909	rs34569731	G	A	NA	Gut microbiota abundance (class Alphaproteobacteria id.2379)	TRUE
3	59982336	0.0927341	0.0207569	9.33254e-06	14306	ebi-a-GCST90016909	rs17061716	G	C	NA	Gut microbiota abundance (class Alphaproteobacteria id.2379)	TRUE
3	84471266	-0.080811	0.0184159	7.53633e-06	14306	ebi-a-GCST90016909	rs55876211	C	T	NA	Gut microbiota abundance (class Alphaproteobacteria id.2379)	TRUE
3	176407911	0.0805256	0.0180912	9.75933e-06	14306	ebi-a-GCST90016909	rs62285697	C	T	NA	Gut microbiota abundance (class Alphaproteobacteria id.2379)	TRUE
3	13726736	-0.0751277	0.0153867	1.05334e-06	14306	ebi-a-GCST90016909	rs9813022	A	G	NA	Gut microbiota abundance (class Alphaproteobacteria id.2379)	TRUE
9	95517807	-0.160677	0.0317708	6.20369e-07	14306	ebi-a-GCST90016909	rs140912403	C	T	NA	Gut microbiota abundance (class Alphaproteobacteria id.2379)	TRUE
12	89471235	-0.0969489	0.0215149	8.84301e-06	14306	ebi-a-GCST90016909	rs7960664	A	G	NA	Gut microbiota abundance (class Alphaproteobacteria id.2379)	TRUE
19	28641647	0.0690234	0.0153829	7.14184e-06	14306	ebi-a-GCST90016909	rs12977163	G	C	NA	Gut microbiota abundance (class Alphaproteobacteria id.2379)	TRUE
1	43767569	0.0637084	0.0135355	2.19053e-06	14306	ebi-a-GCST90017019	rs12566247	T	A	NA	Gut microbiota abundance (genus Intestinimonas id.2062)	TRUE
2	6514088	0.0818068	0.0165992	8.56624e-07	14306	ebi-a-GCST90017019	rs716604	A	G	NA	Gut microbiota abundance (genus Intestinimonas id.2062)	TRUE
2	140898088	0.183158	0.0402743	4.91157e-06	14306	ebi-a-GCST90017019	rs72982915	C	T	NA	Gut microbiota abundance (genus Intestinimonas id.2062)	TRUE
3	150620956	-0.0685233	0.0152546	7.84061e-06	14306	ebi-a-GCST90017019	rs2276760	A	G	NA	Gut microbiota abundance (genus Intestinimonas id.2062)	TRUE
3	10611142	0.130074	0.0267179	2.20308e-06	14306	ebi-a-GCST90017019	rs62240188	G	A	NA	Gut microbiota abundance (genus Intestinimonas id.2062)	TRUE
3	17187502	0.0581947	0.0131455	9.85871e-06	14306	ebi-a-GCST90017019	rs9823439	C	T	NA	Gut microbiota abundance (genus Intestinimonas id.2062)	TRUE
4	114608814	-0.141905	0.0315074	7.305e-06	14306	ebi-a-GCST90017019	rs994794	G	C	NA	Gut microbiota abundance (genus Intestinimonas id.2062)	TRUE
5	17209391	0.120632	0.0257529	1.91743e-06	14306	ebi-a-GCST90017019	rs2731794	C	T	NA	Gut microbiota abundance (genus Intestinimonas id.2062)	TRUE
6	67200802	0.0692373	0.0151154	8.56959e-06	14306	ebi-a-GCST90017019	rs6934519	C	T	NA	Gut microbiota abundance (genus Intestinimonas id.2062)	TRUE
6	155737906	0.162658	0.0367647	9.40503e-06	14306	ebi-a-GCST90017019	rs62427239	C	A	NA	Gut microbiota abundance (genus Intestinimonas id.2062)	TRUE
7	66890843	0.0918017	0.0194885	2.06072e-06	14306	ebi-a-GCST90017019	rs10262702	T	C	NA	Gut microbiota abundance (genus Intestinimonas id.2062)	TRUE
7	22007303	0.060368	0.0131793	4.1223e-06	14306	ebi-a-GCST90017019	rs1859797	G	A	NA	Gut microbiota abundance (genus Intestinimonas id.2062)	TRUE
8	3763540	0.107194	0.0250013	6.37926e-06	14306	ebi-a-GCST90017019	rs17067892	C	T	NA	Gut microbiota abundance (genus Intestinimonas id.2062)	TRUE
10	13124513	0.0660742	0.0134139	6.982e-07	14306	ebi-a-GCST90017019	rs11258178	A	G	NA	Gut microbiota abundance (genus Intestinimonas id.2062)	TRUE
11	94364293	-0.151142	0.0306922	5.12165e-07	14306	ebi-a-GCST90017019	rs12226153	A	G	NA	Gut microbiota abundance (genus Intestinimonas id.2062)	TRUE
13	23343542	-0.0585038	0.013219	9.71292e-06	14306	ebi-a-GCST90017019	rs1000888	C	G	NA	Gut microbiota abundance (genus Intestinimonas id.2062)	TRUE
15	93819735	-0.0658116	0.0140767	2.98353e-06	14306	ebi-a-GCST90017019	rs7170984	T	C	NA	Gut microbiota abundance (genus Intestinimonas id.2062)	TRUE
16	58818770	-0.175324	0.038599	8.71806e-07	14306	ebi-a-GCST90017019	rs4784055	T	C	NA	Gut microbiota abundance (genus Intestinimonas id.2062)	TRUE
16	85327902	-0.0729524	0.0152948	1.34623e-06	14306	ebi-a-GCST90017019	rs2930225	T	G	NA	Gut microbiota abundance (genus Intestinimonas id.2062)	TRUE
20	6218922	-0.218507	0.0490152	7.41635e-06	14306	ebi-a-GCST90017019	rs4113676	A	C	NA	Gut microbiota abundance (genus Intestinimonas id.2062)	TRUE
2	206654123	-0.109619	0.0247785	8.90574e-06	14306	ebi-a-GCST90017068	rs1990708	A	C	NA	Gut microbiota abundance (genus Senegalimassilia id.11160)	TRUE
2	220831701	-0.0774679	0.017084	6.03949e-06	14306	ebi-a-GCST90017068	rs13383270	C	G	NA	Gut microbiota abundance (genus Senegalimassilia id.11160)	TRUE
5	127861692	0.185519	0.0400881	8.05434e-06	14306	ebi-a-GCST90017068	rs10036909	C	T	NA	Gut microbiota abundance (genus Senegalimassilia id.11160)	TRUE
9	34332382	0.081327	0.0171154	2.63463e-06	14306	ebi-a-GCST90017068	rs11787826	C	A	NA	Gut microbiota abundance (genus Senegalimassilia id.11160)	TRUE
13	19489214	0.0819494	0.0172241	2.0332e-06	14306	ebi-a-GCST90017068	rs57512504	T	A	NA	Gut microbiota abundance (genus Senegalimassilia id.11160)	TRUE
14	34431996	0.0782258	0.0176841	9.50298e-06	14306	ebi-a-GCST90017068	rs2017373	C	T	NA	Gut microbiota abundance (genus Senegalimassilia id.11160)	TRUE
17	74949284	-0.0822462	0.0175721	2.41535e-06	14306	ebi-a-GCST90017068	rs72887800	T	A	NA	Gut microbiota abundance (genus Senegalimassilia id.11160)	TRUE
17	48379615	-0.079173	0.0170421	4.18013e-06	14306	ebi-a-GCST90017068	rs7225245	A	G	NA	Gut microbiota abundance (genus Senegalimassilia id.11160)	TRUE
1	100248591	0.100174	0.024	9.0494e-06	14306	ebi-a-GCST90017052	rs6681678	T	C	NA	Gut microbiota abundance (genus Ruminococcaceae NK4A214 group id.11358)	TRUE
1	157338888	-0.0863422	0.0169937	3.66277e-07	14306	ebi-a-GCST90017052	rs11586410	G	A	NA	Gut microbiota abundance (genus Ruminococcaceae NK4A214 group id.11358)	TRUE
2	239087912	-0.0527684	0.0115053	4.87237e-06	14306	ebi-a-GCST90017052	rs12731	A	G	NA	Gut microbiota abundance (genus Ruminococcaceae NK4A214 group id.11358)	TRUE
2	235430299	-0.175266	0.0372779	3.59153e-06	14306	ebi-a-GCST90017052	rs114244418	C	G	NA	Gut microbiota abundance (genus Ruminococcaceae NK4A214 group id.11358)	TRUE
2	141897042	0.107739	0.0233638	3.23139e-06	14306	ebi-a-GCST90017052	rs7573569	T	C	NA	Gut microbiota abundance (genus Ruminococcaceae NK4A214 group id.11358)	TRUE
3	84725039	-0.0574623	0.012594	8.69221e-06	14306	ebi-a-GCST90017052	rs13087692	G	T	NA	Gut microbiota abundance (genus Ruminococcaceae NK4A214 group id.11358)	TRUE
3	26509287	-0.133769	0.0295196	4.72498e-06	14306	ebi-a-GCST90017052	rs147475196	A	G	NA	Gut microbiota abundance (genus Ruminococcaceae NK4A214 group id.11358)	TRUE
4	159932022	0.0553003	0.0119397	3.43005e-06	14306	ebi-a-GCST90017052	rs12642039	C	T	NA	Gut microbiota abundance (genus Ruminococcaceae NK4A214 group id.11358)	TRUE
5	35288938	-0.0925071	0.0203674	4.89024e-06	14306	ebi-a-GCST90017052	rs35559912	T	C	NA	Gut microbiota abundance (genus Ruminococcaceae NK4A214 group id.11358)	TRUE
5	123846318	-0.0533858	0.0120035	6.58977e-06	14306	ebi-a-GCST90017052	rs11241747	T	C	NA	Gut microbiota abundance (genus Ruminococcaceae NK4A214 group id.11358)	TRUE
7	132042135	-0.109257	0.0227458	2.19796e-06	14306	ebi-a-GCST90017052	rs73158814	C	G	NA	Gut microbiota abundance (genus Ruminococcaceae NK4A214 group id.11358)	TRUE
12	78373555	-0.0873312	0.0194886	4.71639e-06	14306	ebi-a-GCST90017052	rs34576931	G	C	NA	Gut microbiota abundance (genus Ruminococcaceae NK4A214 group id.11358)	TRUE
16	24073806	0.0615389	0.0137612	6.58461e-06	14306	ebi-a-GCST90017052	rs62027366	T	C	NA	Gut microbiota abundance (genus Ruminococcaceae NK4A214 group id.11358)	TRUE
20	18030357	-0.1083	0.0230708	4.55187e-06	14306	ebi-a-GCST90017052	rs4814689	C	T	NA	Gut microbiota abundance (genus Ruminococcaceae NK4A214 group id.11358)	TRUE
22	49796014	0.0587521	0.0119155	8.15192e-07	14306	ebi-a-GCST90017052	rs136761	A	G	NA	Gut microbiota abundance (genus Ruminococcaceae NK4A214 group id.11358)	TRUE
22	17793012	-0.0811302	0.0157621	2.35185e-07	14306	ebi-a-GCST90017052	rs5994253	A	G	NA	Gut microbiota abundance (genus Ruminococcaceae NK4A214 group id.11358)	TRUE
1	202299085	0.0915623	0.019936	3.28246e-06	14306	ebi-a-GCST90017057	rs4079028	C	T	NA	Gut microbiota abundance (genus Ruminococcaceae UCG009 id.11366)	TRUE
1	39983022	-0.138137	0.0292072	1.94241e-06	14306	ebi-a-GCST90017057	rs61779334	G	C	NA	Gut microbiota abundance (genus Ruminococcaceae UCG009 id.11366)	TRUE
2	66396776	0.139274	0.0315794	9.80844e-06	14306	ebi-a-GCST90017057	rs138460696	A	G	NA	Gut microbiota abundance (genus Ruminococcaceae UCG009 id.11366)	TRUE
2	75512668	-0.089048	0.0192989	4.87742e-06	14306	ebi-a-GCST90017057	rs2192926	A	G	NA	Gut microbiota abundance (genus Ruminococcaceae UCG009 id.11366)	TRUE
4	7426937	-0.0774649	0.0168937	4.75488e-06	14306	ebi-a-GCST90017057	rs12508214	C	T	NA	Gut microbiota abundance (genus Ruminococcaceae UCG009 id.11366)	TRUE
6	51803869	-0.0928893	0.0208035	7.97701e-06	14306	ebi-a-GCST90017057	rs113006825	T	C	NA	Gut microbiota abundance (genus Ruminococcaceae UCG009 id.11366)	TRUE
6	78106701	-0.084033	0.0174757	1.56246e-06	14306	ebi-a-GCST90017057	rs4708333	T	G	NA	Gut microbiota abundance (genus Ruminococcaceae UCG009 id.11366)	TRUE
7	32001710	0.0732099	0.0166777	8.13055e-06	14306	ebi-a-GCST90017057	rs6952765	G	A	NA	Gut microbiota abundance (genus Ruminococcaceae UCG009 id.11366)	TRUE
12	12970792	-0.0816464	0.017472	3.12486e-06	14306	ebi-a-GCST90017057	rs2058609	G	A	NA	Gut microbiota abundance (genus Ruminococcaceae UCG009 id.11366)	TRUE
13	106650093	-0.0897823	0.0200739	7.00842e-06	14306	ebi-a-GCST90017057	rs9558661	T	C	NA	Gut microbiota abundance (genus Ruminococcaceae UCG009 id.11366)	TRUE
14	39306809	-0.135936	0.0244857	4.42181e-08	14306	ebi-a-GCST90017057	rs8009993	G	C	NA	Gut microbiota abundance (genus Ruminococcaceae UCG009 id.11366)	TRUE
16	1979831	0.17702	0.0375113	9.0099e-06	14306	ebi-a-GCST90017057	rs758191	T	G	NA	Gut microbiota abundance (genus Ruminococcaceae UCG009 id.11366)	TRUE
17	32786955	-0.130842	0.0262478	1.13287e-06	14306	ebi-a-GCST90017057	rs1550196	A	G	NA	Gut microbiota abundance (genus Ruminococcaceae UCG009 id.11366)	TRUE
19	52399401	0.120989	0.0277317	9.67208e-06	14306	ebi-a-GCST90017057	rs78410648	A	G	NA	Gut microbiota abundance (genus Ruminococcaceae UCG009 id.11366)	TRUE
1	234157721	0.115182	0.0246006	3.10592e-06	14306	ebi-a-GCST90017022	rs12127733	G	A	NA	Gut microbiota abundance (genus Lachnospiraceae NC2004 group id.11316)	TRUE
5	149544722	-0.0883469	0.0188397	3.32583e-06	14306	ebi-a-GCST90017022	rs3756315	A	G	NA	Gut microbiota abundance (genus Lachnospiraceae NC2004 group id.11316)	TRUE
6	22725908	-0.154739	0.0340372	9.74833e-06	14306	ebi-a-GCST90017022	rs12208226	C	A	NA	Gut microbiota abundance (genus Lachnospiraceae NC2004 group id.11316)	TRUE
9	29334137	0.102522	0.0226445	6.17234e-06	14306	ebi-a-GCST90017022	rs1928659	T	C	NA	Gut microbiota abundance (genus Lachnospiraceae NC2004 group id.11316)	TRUE
9	122239986	-0.0948806	0.0208369	5.34355e-06	14306	ebi-a-GCST90017022	rs1331592	G	C	NA	Gut microbiota abundance (genus Lachnospiraceae NC2004 group id.11316)	TRUE
13	76829562	0.0837206	0.0190318	9.05503e-06	14306	ebi-a-GCST90017022	rs1929743	T	C	NA	Gut microbiota abundance (genus Lachnospiraceae NC2004 group id.11316)	TRUE
13	47512191	-0.156365	0.0345372	6.03976e-06	14306	ebi-a-GCST90017022	rs12863463	G	A	NA	Gut microbiota abundance (genus Lachnospiraceae NC2004 group id.11316)	TRUE
17	21157406	-0.169687	0.0383169	9.13314e-06	14306	ebi-a-GCST90017022	rs117467633	T	C	NA	Gut microbiota abundance (genus Lachnospiraceae NC2004 group id.11316)	TRUE
18	58229086	-0.154631	0.0352194	5.61203e-06	14306	ebi-a-GCST90017022	rs17067076	G	A	NA	Gut microbiota abundance (genus Lachnospiraceae NC2004 group id.11316)	TRUE
20	5330700	0.0994748	0.0209139	2.92247e-06	14306	ebi-a-GCST90017022	rs6116753	G	A	NA	Gut microbiota abundance (genus Lachnospiraceae NC2004 group id.11316)	TRUE
1	203102563	0.0595857	0.01296	4.24326e-06	14306	ebi-a-GCST90016924	rs6427992	C	G	NA	Gut microbiota abundance (family Acidaminococcaceae id.2166)	TRUE
3	186553389	-0.108969	0.0243533	7.0881e-06	14306	ebi-a-GCST90016924	rs74540770	G	A	NA	Gut microbiota abundance (family Acidaminococcaceae id.2166)	TRUE
3	18462531	-0.143755	0.0323244	9.16474e-06	14306	ebi-a-GCST90016924	rs78702810	T	C	NA	Gut microbiota abundance (family Acidaminococcaceae id.2166)	TRUE
6	158647999	-0.065675	0.0142257	3.24908e-06	14306	ebi-a-GCST90016924	rs262812	T	C	NA	Gut microbiota abundance (family Acidaminococcaceae id.2166)	TRUE
6	5723181	-0.0796106	0.0169192	2.21304e-06	14306	ebi-a-GCST90016924	rs6923842	T	C	NA	Gut microbiota abundance (family Acidaminococcaceae id.2166)	TRUE
9	107117653	0.0662557	0.0140257	2.23676e-06	14306	ebi-a-GCST90016924	rs2933324	G	A	NA	Gut microbiota abundance (family Acidaminococcaceae id.2166)	TRUE
11	114701288	-0.165911	0.0349516	2.3151e-06	14306	ebi-a-GCST90016924	rs6589457	G	A	NA	Gut microbiota abundance (family Acidaminococcaceae id.2166)	TRUE
20	61991833	-0.117863	0.0257351	5.86422e-06	14306	ebi-a-GCST90016924	rs45497800	T	C	NA	Gut microbiota abundance (family Acidaminococcaceae id.2166)	TRUE
1	207003553	-0.0711483	0.0134495	1.10652e-07	14306	ebi-a-GCST90016908	rs6660520	G	A	NA	Gut microbiota abundance (class Actinobacteria id.419)	TRUE
1	114665485	0.0510452	0.0114325	8.62621e-06	14306	ebi-a-GCST90016908	rs12049045	A	G	NA	Gut microbiota abundance (class Actinobacteria id.419)	TRUE
2	136616754	-0.111489	0.012066	3.78966e-20	14306	ebi-a-GCST90016908	rs182549	T	C	NA	Gut microbiota abundance (class Actinobacteria id.419)	TRUE
2	161611969	0.0509242	0.0112503	6.71382e-06	14306	ebi-a-GCST90016908	rs1376754	G	A	NA	Gut microbiota abundance (class Actinobacteria id.419)	TRUE
5	475408	0.0563759	0.0115529	1.58132e-06	14306	ebi-a-GCST90016908	rs11745923	G	T	NA	Gut microbiota abundance (class Actinobacteria id.419)	TRUE
5	18019549	-0.0769653	0.0173933	8.62144e-06	14306	ebi-a-GCST90016908	rs7700479	T	A	NA	Gut microbiota abundance (class Actinobacteria id.419)	TRUE
6	14617591	0.0509553	0.011539	8.92237e-06	14306	ebi-a-GCST90016908	rs857444	C	T	NA	Gut microbiota abundance (class Actinobacteria id.419)	TRUE
7	95654718	0.0501255	0.011255	8.67601e-06	14306	ebi-a-GCST90016908	rs961091	G	A	NA	Gut microbiota abundance (class Actinobacteria id.419)	TRUE
8	65654844	0.155784	0.0348017	8.62105e-06	14306	ebi-a-GCST90016908	rs80083040	T	G	NA	Gut microbiota abundance (class Actinobacteria id.419)	TRUE
10	126110032	-0.0762317	0.0169884	4.96364e-06	14306	ebi-a-GCST90016908	rs1515761	C	T	NA	Gut microbiota abundance (class Actinobacteria id.419)	TRUE
11	71221248	-0.0540741	0.0121393	5.39237e-06	14306	ebi-a-GCST90016908	rs4945008	G	A	NA	Gut microbiota abundance (class Actinobacteria id.419)	TRUE
12	20378911	-0.0583765	0.0123353	2.59358e-06	14306	ebi-a-GCST90016908	rs10841473	G	C	NA	Gut microbiota abundance (class Actinobacteria id.419)	TRUE
13	112859829	0.0944467	0.0192976	6.20798e-07	14306	ebi-a-GCST90016908	rs7322849	T	C	NA	Gut microbiota abundance (class Actinobacteria id.419)	TRUE
15	49208992	-0.0719923	0.0154661	4.02819e-06	14306	ebi-a-GCST90016908	rs12899991	T	A	NA	Gut microbiota abundance (class Actinobacteria id.419)	TRUE
15	94852795	-0.126352	0.0273626	2.56803e-06	14306	ebi-a-GCST90016908	rs72767435	T	C	NA	Gut microbiota abundance (class Actinobacteria id.419)	TRUE
16	81776768	-0.0575816	0.0116762	8.3372e-07	14306	ebi-a-GCST90016908	rs8047955	G	A	NA	Gut microbiota abundance (class Actinobacteria id.419)	TRUE
17	75348675	-0.0560674	0.0124286	5.92516e-06	14306	ebi-a-GCST90016908	rs11655079	T	C	NA	Gut microbiota abundance (class Actinobacteria id.419)	TRUE
22	35567355	-0.111877	0.023501	1.50428e-06	14306	ebi-a-GCST90016908	rs134366	A	G	NA	Gut microbiota abundance (class Actinobacteria id.419)	TRUE
1	95178974	0.0697527	0.0153607	7.3426e-06	14306	ebi-a-GCST90017048	rs12740451	T	C	NA	Gut microbiota abundance (genus Roseburia id.2012)	TRUE
1	194183650	-0.0777312	0.0172985	8.12587e-06	14306	ebi-a-GCST90017048	rs302266	T	C	NA	Gut microbiota abundance (genus Roseburia id.2012)	TRUE
3	57116228	0.0497336	0.0108158	3.5272e-06	14306	ebi-a-GCST90017048	rs6445851	A	G	NA	Gut microbiota abundance (genus Roseburia id.2012)	TRUE
4	119349	-0.153844	0.0329324	1.19525e-06	14306	ebi-a-GCST90017048	rs116270582	T	A	NA	Gut microbiota abundance (genus Roseburia id.2012)	TRUE
5	89598914	0.0493786	0.0106763	4.11405e-06	14306	ebi-a-GCST90017048	rs2943022	T	C	NA	Gut microbiota abundance (genus Roseburia id.2012)	TRUE
5	144135655	0.0968739	0.0214067	9.98321e-06	14306	ebi-a-GCST90017048	rs78753150	A	C	NA	Gut microbiota abundance (genus Roseburia id.2012)	TRUE
5	125076494	0.0690327	0.0152884	5.90147e-06	14306	ebi-a-GCST90017048	rs329182	T	C	NA	Gut microbiota abundance (genus Roseburia id.2012)	TRUE
6	166170836	-0.104628	0.0230897	7.50205e-06	14306	ebi-a-GCST90017048	rs75326254	C	T	NA	Gut microbiota abundance (genus Roseburia id.2012)	TRUE
6	12774611	-0.0961587	0.0204975	2.47942e-06	14306	ebi-a-GCST90017048	rs6930661	C	T	NA	Gut microbiota abundance (genus Roseburia id.2012)	TRUE
10	16051097	0.0488326	0.0106404	4.67218e-06	14306	ebi-a-GCST90017048	rs4748237	G	C	NA	Gut microbiota abundance (genus Roseburia id.2012)	TRUE
10	79277321	-0.232125	0.0481562	1.47798e-07	14306	ebi-a-GCST90017048	rs75820970	C	G	NA	Gut microbiota abundance (genus Roseburia id.2012)	TRUE
11	12009569	-0.0980434	0.020957	2.91112e-06	14306	ebi-a-GCST90017048	rs16910295	T	C	NA	Gut microbiota abundance (genus Roseburia id.2012)	TRUE
12	50650057	-0.0550687	0.0112481	9.6984e-07	14306	ebi-a-GCST90017048	rs2160994	C	T	NA	Gut microbiota abundance (genus Roseburia id.2012)	TRUE
13	103117486	-0.0588452	0.0126228	4.75116e-06	14306	ebi-a-GCST90017048	rs9300744	C	T	NA	Gut microbiota abundance (genus Roseburia id.2012)	TRUE
15	86512809	0.179284	0.0404954	9.98964e-06	14306	ebi-a-GCST90017048	rs55858165	A	C	NA	Gut microbiota abundance (genus Roseburia id.2012)	TRUE
15	37859065	0.0741405	0.0171601	8.30099e-06	14306	ebi-a-GCST90017048	rs57466170	C	T	NA	Gut microbiota abundance (genus Roseburia id.2012)	TRUE
16	8307948	0.0629765	0.0123489	5.01164e-07	14306	ebi-a-GCST90017048	rs2034589	G	C	NA	Gut microbiota abundance (genus Roseburia id.2012)	TRUE
1	185091351	-0.0468097	0.0105787	9.57194e-06	14306	ebi-a-GCST90017020	rs12566975	T	C	NA	Gut microbiota abundance (genus Lachnoclostridium id.11308)	TRUE
2	167244051	0.0497799	0.0111919	9.63984e-06	14306	ebi-a-GCST90017020	rs1528479	A	G	NA	Gut microbiota abundance (genus Lachnoclostridium id.11308)	TRUE
3	23037786	0.0511752	0.0106491	2.0268e-06	14306	ebi-a-GCST90017020	rs615997	T	C	NA	Gut microbiota abundance (genus Lachnoclostridium id.11308)	TRUE
3	177470032	0.0864203	0.0181565	1.58332e-06	14306	ebi-a-GCST90017020	rs62285313	A	G	NA	Gut microbiota abundance (genus Lachnoclostridium id.11308)	TRUE
3	66725825	0.078627	0.0175644	6.31379e-06	14306	ebi-a-GCST90017020	rs1031599	T	G	NA	Gut microbiota abundance (genus Lachnoclostridium id.11308)	TRUE
4	38694566	-0.0864066	0.0192519	6.72048e-06	14306	ebi-a-GCST90017020	rs3821998	C	A	NA	Gut microbiota abundance (genus Lachnoclostridium id.11308)	TRUE
8	59370320	0.0520267	0.011404	4.41754e-06	14306	ebi-a-GCST90017020	rs4738679	A	G	NA	Gut microbiota abundance (genus Lachnoclostridium id.11308)	TRUE
12	102046595	0.108075	0.0242022	5.97077e-06	14306	ebi-a-GCST90017020	rs1997204	C	T	NA	Gut microbiota abundance (genus Lachnoclostridium id.11308)	TRUE
16	27217620	0.0469989	0.0105971	9.17044e-06	14306	ebi-a-GCST90017020	rs62028349	G	C	NA	Gut microbiota abundance (genus Lachnoclostridium id.11308)	TRUE
17	46694541	0.117472	0.0268103	5.57763e-06	14306	ebi-a-GCST90017020	rs72829893	G	T	NA	Gut microbiota abundance (genus Lachnoclostridium id.11308)	TRUE
17	13816159	0.0886199	0.0194248	3.66522e-06	14306	ebi-a-GCST90017020	rs78068103	A	G	NA	Gut microbiota abundance (genus Lachnoclostridium id.11308)	TRUE
18	19743455	0.0746186	0.0180734	7.13724e-06	14306	ebi-a-GCST90017020	rs2385421	A	G	NA	Gut microbiota abundance (genus Lachnoclostridium id.11308)	TRUE
18	1053252	-0.0641288	0.0137974	3.75327e-06	14306	ebi-a-GCST90017020	rs789029	C	T	NA	Gut microbiota abundance (genus Lachnoclostridium id.11308)	TRUE
20	19300846	-0.0561715	0.0108174	2.43215e-07	14306	ebi-a-GCST90017020	rs6112314	A	C	NA	Gut microbiota abundance (genus Lachnoclostridium id.11308)	TRUE
1	230523039	-0.0895168	0.0186555	1.27025e-06	14306	ebi-a-GCST90017100	rs16851659	G	C	NA	Gut microbiota abundance (order Gastranaerophilales id.1591)	TRUE
3	14306949	-0.160521	0.0292752	4.65876e-08	14306	ebi-a-GCST90017100	rs9864379	T	C	NA	Gut microbiota abundance (order Gastranaerophilales id.1591)	TRUE
7	20010624	0.164631	0.0356037	3.62376e-06	14306	ebi-a-GCST90017100	rs73074665	A	T	NA	Gut microbiota abundance (order Gastranaerophilales id.1591)	TRUE
9	24648997	-0.20591	0.0455376	7.7398e-06	14306	ebi-a-GCST90017100	rs113884518	T	C	NA	Gut microbiota abundance (order Gastranaerophilales id.1591)	TRUE
9	115975389	0.0904264	0.0185253	1.21742e-06	14306	ebi-a-GCST90017100	rs4129395	G	A	NA	Gut microbiota abundance (order Gastranaerophilales id.1591)	TRUE
9	122046549	-0.126305	0.0279161	4.85959e-06	14306	ebi-a-GCST90017100	rs1221147	A	T	NA	Gut microbiota abundance (order Gastranaerophilales id.1591)	TRUE
11	2937631	0.0841649	0.0185948	7.52419e-06	14306	ebi-a-GCST90017100	rs367480	A	G	NA	Gut microbiota abundance (order Gastranaerophilales id.1591)	TRUE
15	100747683	0.226103	0.0488017	3.5381e-06	14306	ebi-a-GCST90017100	rs79790072	T	C	NA	Gut microbiota abundance (order Gastranaerophilales id.1591)	TRUE
15	62055753	0.08346	0.0188504	9.78228e-06	14306	ebi-a-GCST90017100	rs8028558	A	G	NA	Gut microbiota abundance (order Gastranaerophilales id.1591)	TRUE
16	80493705	0.098235	0.0197127	7.36055e-07	14306	ebi-a-GCST90017100	rs11150282	T	C	NA	Gut microbiota abundance (order Gastranaerophilales id.1591)	TRUE
17	53906328	0.213083	0.0471377	8.05954e-06	14306	ebi-a-GCST90017100	rs28678345	T	C	NA	Gut microbiota abundance (order Gastranaerophilales id.1591)	TRUE
18	1008278	-0.10413	0.0234459	6.5001e-06	14306	ebi-a-GCST90017100	rs789069	A	C	NA	Gut microbiota abundance (order Gastranaerophilales id.1591)	TRUE
1	34308917	0.0601661	0.0126752	2.60555e-06	14306	ebi-a-GCST90017000	rs10798999	C	T	NA	Gut microbiota abundance (genus Eubacterium hallii group id.11338)	TRUE
1	104524676	0.0810805	0.0184573	9.45453e-06	14306	ebi-a-GCST90017000	rs17474256	G	A	NA	Gut microbiota abundance (genus Eubacterium hallii group id.11338)	TRUE
3	23663416	0.198087	0.0443545	4.82303e-06	14306	ebi-a-GCST90017000	rs6550770	C	T	NA	Gut microbiota abundance (genus Eubacterium hallii group id.11338)	TRUE
3	110283389	-0.0540164	0.0116101	3.29003e-06	14306	ebi-a-GCST90017000	rs949971	T	G	NA	Gut microbiota abundance (genus Eubacterium hallii group id.11338)	TRUE
3	64664456	0.126115	0.0268627	4.43231e-06	14306	ebi-a-GCST90017000	rs28584818	A	G	NA	Gut microbiota abundance (genus Eubacterium hallii group id.11338)	TRUE
3	195238086	0.153138	0.0349456	5.43063e-06	14306	ebi-a-GCST90017000	rs138531890	A	G	NA	Gut microbiota abundance (genus Eubacterium hallii group id.11338)	TRUE
4	183709536	-0.0813986	0.0189272	9.3491e-06	14306	ebi-a-GCST90017000	rs17074066	T	C	NA	Gut microbiota abundance (genus Eubacterium hallii group id.11338)	TRUE
4	111885431	0.154124	0.0297185	2.9449e-07	14306	ebi-a-GCST90017000	rs13116360	T	C	NA	Gut microbiota abundance (genus Eubacterium hallii group id.11338)	TRUE
7	148856720	0.0522832	0.0111865	2.69675e-06	14306	ebi-a-GCST90017000	rs60254196	G	A	NA	Gut microbiota abundance (genus Eubacterium hallii group id.11338)	TRUE
7	100635375	0.0504747	0.0109922	4.42446e-06	14306	ebi-a-GCST90017000	rs10808115	C	A	NA	Gut microbiota abundance (genus Eubacterium hallii group id.11338)	TRUE
11	58040621	-0.115589	0.0252489	5.41914e-06	14306	ebi-a-GCST90017000	rs10501370	C	T	NA	Gut microbiota abundance (genus Eubacterium hallii group id.11338)	TRUE
11	123789877	-0.0507411	0.0113758	8.2882e-06	14306	ebi-a-GCST90017000	rs78056098	G	T	NA	Gut microbiota abundance (genus Eubacterium hallii group id.11338)	TRUE
11	11771637	-0.126582	0.028712	7.85995e-06	14306	ebi-a-GCST90017000	rs117748144	T	C	NA	Gut microbiota abundance (genus Eubacterium hallii group id.11338)	TRUE
15	62014160	0.208943	0.043822	3.70254e-06	14306	ebi-a-GCST90017000	rs74018587	C	T	NA	Gut microbiota abundance (genus Eubacterium hallii group id.11338)	TRUE
18	48384463	-0.0508914	0.0114352	9.15756e-06	14306	ebi-a-GCST90017000	rs630939	C	T	NA	Gut microbiota abundance (genus Eubacterium hallii group id.11338)	TRUE
19	49214274	-0.0499523	0.0112153	9.32803e-06	14306	ebi-a-GCST90017000	rs281379	A	G	NA	Gut microbiota abundance (genus Eubacterium hallii group id.11338)	TRUE
1	105422565	-0.0655855	0.0142236	4.0635e-06	14306	ebi-a-GCST90016961	rs11184341	C	G	NA	Gut microbiota abundance (genus Akkermansia id.4037)	TRUE
1	41074472	-0.0760539	0.0167769	6.32121e-06	14306	ebi-a-GCST90016961	rs61779207	G	A	NA	Gut microbiota abundance (genus Akkermansia id.4037)	TRUE
4	95027272	0.0750473	0.0150184	6.58385e-07	14306	ebi-a-GCST90016961	rs11729256	T	C	NA	Gut microbiota abundance (genus Akkermansia id.4037)	TRUE
4	100544188	0.112623	0.0236434	1.4802e-06	14306	ebi-a-GCST90016961	rs74542928	T	C	NA	Gut microbiota abundance (genus Akkermansia id.4037)	TRUE
6	56341481	-0.0703407	0.0147133	2.59884e-06	14306	ebi-a-GCST90016961	rs9349825	A	G	NA	Gut microbiota abundance (genus Akkermansia id.4037)	TRUE
10	5064327	-0.0685454	0.0147701	2.99799e-06	14306	ebi-a-GCST90016961	rs4242783	A	G	NA	Gut microbiota abundance (genus Akkermansia id.4037)	TRUE
11	130280667	-0.0649225	0.0135934	1.1036e-06	14306	ebi-a-GCST90016961	rs4936098	G	A	NA	Gut microbiota abundance (genus Akkermansia id.4037)	TRUE
12	130309670	0.0911199	0.0196748	3.39234e-06	14306	ebi-a-GCST90016961	rs111862613	T	C	NA	Gut microbiota abundance (genus Akkermansia id.4037)	TRUE
15	97570657	0.061772	0.0130954	2.2648e-06	14306	ebi-a-GCST90016961	rs12908520	G	A	NA	Gut microbiota abundance (genus Akkermansia id.4037)	TRUE
16	81063149	-0.0745352	0.0156201	2.71569e-06	14306	ebi-a-GCST90016961	rs2602429	T	C	NA	Gut microbiota abundance (genus Akkermansia id.4037)	TRUE
18	49473635	0.204406	0.0431629	3.01141e-06	14306	ebi-a-GCST90016961	rs117107102	A	G	NA	Gut microbiota abundance (genus Akkermansia id.4037)	TRUE
20	31867840	-0.0632957	0.0143777	9.17128e-06	14306	ebi-a-GCST90016961	rs941682	G	A	NA	Gut microbiota abundance (genus Akkermansia id.4037)	TRUE
1	78619512	0.111984	0.0251088	9.94672e-06	14306	ebi-a-GCST90016949	rs6679026	T	C	NA	Gut microbiota abundance (family Rhodospirillaceae id.2717)	TRUE
1	92206218	0.0816858	0.0180791	7.3492e-06	14306	ebi-a-GCST90016949	rs72714493	A	G	NA	Gut microbiota abundance (family Rhodospirillaceae id.2717)	TRUE
2	169033340	0.136049	0.0285767	1.48988e-06	14306	ebi-a-GCST90016949	rs76784716	A	G	NA	Gut microbiota abundance (family Rhodospirillaceae id.2717)	TRUE
2	225633812	0.0971389	0.0200064	1.71479e-06	14306	ebi-a-GCST90016949	rs3754624	C	T	NA	Gut microbiota abundance (family Rhodospirillaceae id.2717)	TRUE
3	13726736	-0.0842444	0.0163583	2.53122e-07	14306	ebi-a-GCST90016949	rs9813022	A	G	NA	Gut microbiota abundance (family Rhodospirillaceae id.2717)	TRUE
3	84471266	-0.0911851	0.0196395	2.86682e-06	14306	ebi-a-GCST90016949	rs55876211	C	T	NA	Gut microbiota abundance (family Rhodospirillaceae id.2717)	TRUE
4	134192918	-0.0911896	0.0204907	6.67298e-06	14306	ebi-a-GCST90016949	rs74354280	C	T	NA	Gut microbiota abundance (family Rhodospirillaceae id.2717)	TRUE
5	27945645	0.0999312	0.0218634	4.70392e-06	14306	ebi-a-GCST90016949	rs1549633	A	C	NA	Gut microbiota abundance (family Rhodospirillaceae id.2717)	TRUE
5	119372737	-0.11354	0.0250863	5.84454e-06	14306	ebi-a-GCST90016949	rs1035406	G	A	NA	Gut microbiota abundance (family Rhodospirillaceae id.2717)	TRUE
6	89268715	-0.0999238	0.0227326	9.63696e-06	14306	ebi-a-GCST90016949	rs1923415	A	G	NA	Gut microbiota abundance (family Rhodospirillaceae id.2717)	TRUE
8	131958403	0.117366	0.0261324	5.34749e-06	14306	ebi-a-GCST90016949	rs7001029	C	T	NA	Gut microbiota abundance (family Rhodospirillaceae id.2717)	TRUE
10	113419797	0.0743184	0.0158724	2.67147e-06	14306	ebi-a-GCST90016949	rs11591293	G	T	NA	Gut microbiota abundance (family Rhodospirillaceae id.2717)	TRUE
10	2670553	0.107529	0.0235725	3.12018e-06	14306	ebi-a-GCST90016949	rs4278423	T	C	NA	Gut microbiota abundance (family Rhodospirillaceae id.2717)	TRUE
12	73139398	0.164808	0.0360647	7.22587e-06	14306	ebi-a-GCST90016949	rs61933850	G	A	NA	Gut microbiota abundance (family Rhodospirillaceae id.2717)	TRUE
16	88554243	-0.0701719	0.0158061	9.17339e-06	14306	ebi-a-GCST90016949	rs13336560	C	T	NA	Gut microbiota abundance (family Rhodospirillaceae id.2717)	TRUE
19	28641647	0.0730952	0.0163491	7.62588e-06	14306	ebi-a-GCST90016949	rs12977163	G	C	NA	Gut microbiota abundance (family Rhodospirillaceae id.2717)	TRUE
22	27173098	0.0734321	0.0160521	7.00519e-06	14306	ebi-a-GCST90016949	rs4822789	G	C	NA	Gut microbiota abundance (family Rhodospirillaceae id.2717)	TRUE
3	171947435	0.130293	0.0242237	7.51069e-08	14306	ebi-a-GCST90017038	rs4428215	G	A	NA	Gut microbiota abundance (genus Oxalobacter id.2978)	TRUE
4	189935314	0.207847	0.0421439	8.79812e-07	14306	ebi-a-GCST90017038	rs36057338	G	T	NA	Gut microbiota abundance (genus Oxalobacter id.2978)	TRUE
6	38550301	-0.138078	0.0296981	3.64502e-06	14306	ebi-a-GCST90017038	rs1569853	T	C	NA	Gut microbiota abundance (genus Oxalobacter id.2978)	TRUE
8	115560689	0.127217	0.0278855	7.12771e-06	14306	ebi-a-GCST90017038	rs6993398	G	A	NA	Gut microbiota abundance (genus Oxalobacter id.2978)	TRUE
8	20902693	0.137691	0.0294804	3.29754e-06	14306	ebi-a-GCST90017038	rs10464997	G	A	NA	Gut microbiota abundance (genus Oxalobacter id.2978)	TRUE
9	19682558	0.217122	0.0466317	1.41504e-06	14306	ebi-a-GCST90017038	rs12002250	A	C	NA	Gut microbiota abundance (genus Oxalobacter id.2978)	TRUE
9	87514407	-0.117882	0.0211262	2.57472e-08	14306	ebi-a-GCST90017038	rs736744	T	C	NA	Gut microbiota abundance (genus Oxalobacter id.2978)	TRUE
11	126582578	-0.172142	0.0394026	9.18692e-06	14306	ebi-a-GCST90017038	rs3862635	C	T	NA	Gut microbiota abundance (genus Oxalobacter id.2978)	TRUE
12	96819204	-0.199099	0.0427327	3.74283e-06	14306	ebi-a-GCST90017038	rs11108500	A	G	NA	Gut microbiota abundance (genus Oxalobacter id.2978)	TRUE
15	93941937	0.213114	0.047162	7.29861e-06	14306	ebi-a-GCST90017038	rs111966731	T	C	NA	Gut microbiota abundance (genus Oxalobacter id.2978)	TRUE
20	59502888	-0.105512	0.021489	1.07431e-06	14306	ebi-a-GCST90017038	rs6071435	T	A	NA	Gut microbiota abundance (genus Oxalobacter id.2978)	TRUE
22	37421469	-0.130992	0.0253804	2.06054e-07	14306	ebi-a-GCST90017038	rs6000536	C	T	NA	Gut microbiota abundance (genus Oxalobacter id.2978)	TRUE
2	67852836	-0.0509823	0.0111975	5.07762e-06	14306	ebi-a-GCST90016946	rs6721459	G	A	NA	Gut microbiota abundance (family Peptostreptococcaceae id.2042)	TRUE
3	151781175	-0.0525658	0.0112476	3.16548e-06	14306	ebi-a-GCST90016946	rs1520207	T	C	NA	Gut microbiota abundance (family Peptostreptococcaceae id.2042)	TRUE
4	14324623	-0.0566637	0.012276	4.03395e-06	14306	ebi-a-GCST90016946	rs10805326	A	G	NA	Gut microbiota abundance (family Peptostreptococcaceae id.2042)	TRUE
4	171180190	0.0642075	0.0126913	4.21124e-07	14306	ebi-a-GCST90016946	rs4692811	C	T	NA	Gut microbiota abundance (family Peptostreptococcaceae id.2042)	TRUE
7	46710977	0.182411	0.0372126	1.02795e-06	14306	ebi-a-GCST90016946	rs117020988	C	T	NA	Gut microbiota abundance (family Peptostreptococcaceae id.2042)	TRUE
7	44312824	0.124203	0.0266923	3.24056e-06	14306	ebi-a-GCST90016946	rs76982728	T	C	NA	Gut microbiota abundance (family Peptostreptococcaceae id.2042)	TRUE
8	26726641	-0.0558506	0.011224	6.3333e-07	14306	ebi-a-GCST90016946	rs2644627	C	G	NA	Gut microbiota abundance (family Peptostreptococcaceae id.2042)	TRUE
9	16786784	-0.252	0.0511627	7.26256e-07	14306	ebi-a-GCST90016946	rs12377846	C	A	NA	Gut microbiota abundance (family Peptostreptococcaceae id.2042)	TRUE
10	17019559	0.0919658	0.0161331	9.80122e-09	14306	ebi-a-GCST90016946	rs61841503	G	A	NA	Gut microbiota abundance (family Peptostreptococcaceae id.2042)	TRUE
10	14650535	0.106725	0.0245638	8.13711e-06	14306	ebi-a-GCST90016946	rs77540684	T	G	NA	Gut microbiota abundance (family Peptostreptococcaceae id.2042)	TRUE
13	77351196	-0.0693637	0.0142907	1.70589e-06	14306	ebi-a-GCST90016946	rs9573937	A	G	NA	Gut microbiota abundance (family Peptostreptococcaceae id.2042)	TRUE
16	89246670	-0.0573764	0.0127192	7.69024e-06	14306	ebi-a-GCST90016946	rs59865771	C	T	NA	Gut microbiota abundance (family Peptostreptococcaceae id.2042)	TRUE
17	38216487	0.072584	0.0162321	7.89805e-06	14306	ebi-a-GCST90016946	rs1467258	G	A	NA	Gut microbiota abundance (family Peptostreptococcaceae id.2042)	TRUE
18	65324280	0.126264	0.0268383	2.48737e-06	14306	ebi-a-GCST90016946	rs75819860	T	A	NA	Gut microbiota abundance (family Peptostreptococcaceae id.2042)	TRUE
19	17414138	0.0571818	0.0125947	5.76713e-06	14306	ebi-a-GCST90016946	rs12986312	T	G	NA	Gut microbiota abundance (family Peptostreptococcaceae id.2042)	TRUE
22	37976422	-0.0537078	0.011443	2.70085e-06	14306	ebi-a-GCST90016946	rs59987323	C	T	NA	Gut microbiota abundance (family Peptostreptococcaceae id.2042)	TRUE
3	94103591	0.107024	0.0228121	3.59484e-06	14306	ebi-a-GCST90017070	rs11720390	G	A	NA	Gut microbiota abundance (genus Streptococcus id.1853)	TRUE
3	132058723	-0.0633829	0.0136647	4.93867e-06	14306	ebi-a-GCST90017070	rs6806351	T	C	NA	Gut microbiota abundance (genus Streptococcus id.1853)	TRUE
4	37452858	-0.0907696	0.0200344	5.47545e-06	14306	ebi-a-GCST90017070	rs57646748	G	A	NA	Gut microbiota abundance (genus Streptococcus id.1853)	TRUE
4	53657577	-0.0921167	0.0191881	7.30348e-06	14306	ebi-a-GCST90017070	rs10028567	C	T	NA	Gut microbiota abundance (genus Streptococcus id.1853)	TRUE
5	169689604	0.0792781	0.0173697	4.36506e-06	14306	ebi-a-GCST90017070	rs395407	C	G	NA	Gut microbiota abundance (genus Streptococcus id.1853)	TRUE
7	46774896	-0.0695345	0.0143671	1.28632e-06	14306	ebi-a-GCST90017070	rs11764382	A	G	NA	Gut microbiota abundance (genus Streptococcus id.1853)	TRUE
8	10199548	-0.0793955	0.0170628	3.04096e-06	14306	ebi-a-GCST90017070	rs17708276	A	G	NA	Gut microbiota abundance (genus Streptococcus id.1853)	TRUE
9	93556174	-0.0517935	0.0111324	3.30704e-06	14306	ebi-a-GCST90017070	rs10448310	A	G	NA	Gut microbiota abundance (genus Streptococcus id.1853)	TRUE
10	8102404	0.0931048	0.0207949	6.51478e-06	14306	ebi-a-GCST90017070	rs71481756	T	G	NA	Gut microbiota abundance (genus Streptococcus id.1853)	TRUE
10	28588269	0.102891	0.0217362	2.717e-06	14306	ebi-a-GCST90017070	rs7916711	A	G	NA	Gut microbiota abundance (genus Streptococcus id.1853)	TRUE
11	131649446	-0.059639	0.0128148	2.44068e-06	14306	ebi-a-GCST90017070	rs1918540	A	G	NA	Gut microbiota abundance (genus Streptococcus id.1853)	TRUE
12	100584014	-0.137519	0.0227398	2.58315e-09	14306	ebi-a-GCST90017070	rs11110281	T	C	NA	Gut microbiota abundance (genus Streptococcus id.1853)	TRUE
14	97526750	-0.0816836	0.0185851	9.75237e-06	14306	ebi-a-GCST90017070	rs2370083	G	T	NA	Gut microbiota abundance (genus Streptococcus id.1853)	TRUE
15	41663393	0.0959942	0.0193213	1.03307e-06	14306	ebi-a-GCST90017070	rs72739637	A	G	NA	Gut microbiota abundance (genus Streptococcus id.1853)	TRUE
16	73391982	-0.0827344	0.0180035	5.8213e-06	14306	ebi-a-GCST90017070	rs6563952	C	G	NA	Gut microbiota abundance (genus Streptococcus id.1853)	TRUE
17	61298020	-0.0515109	0.0112068	3.7812e-06	14306	ebi-a-GCST90017070	rs4968759	A	G	NA	Gut microbiota abundance (genus Streptococcus id.1853)	TRUE
17	80576624	-0.0709483	0.0155275	4.17994e-06	14306	ebi-a-GCST90017070	rs9903102	C	A	NA	Gut microbiota abundance (genus Streptococcus id.1853)	TRUE
1	4210455	0.0727361	0.0161662	6.30681e-06	14306	ebi-a-GCST90016984	rs9426473	A	G	NA	Gut microbiota abundance (genus Coprococcus2 id.11302)	TRUE
1	112139008	-0.0804405	0.0164216	1.185e-06	14306	ebi-a-GCST90016984	rs6677933	C	T	NA	Gut microbiota abundance (genus Coprococcus2 id.11302)	TRUE
1	223688236	-0.0955381	0.0215724	6.68252e-06	14306	ebi-a-GCST90016984	rs61823518	A	C	NA	Gut microbiota abundance (genus Coprococcus2 id.11302)	TRUE
3	180544880	0.0736486	0.0164921	9.95108e-06	14306	ebi-a-GCST90016984	rs12634070	T	C	NA	Gut microbiota abundance (genus Coprococcus2 id.11302)	TRUE
4	131125786	-0.0649382	0.013919	2.27117e-06	14306	ebi-a-GCST90016984	rs72680320	T	C	NA	Gut microbiota abundance (genus Coprococcus2 id.11302)	TRUE
5	34794789	0.0594312	0.0135375	7.64874e-06	14306	ebi-a-GCST90016984	rs10070053	A	G	NA	Gut microbiota abundance (genus Coprococcus2 id.11302)	TRUE
9	25554068	0.0754415	0.0164619	4.72335e-06	14306	ebi-a-GCST90016984	rs2482516	C	T	NA	Gut microbiota abundance (genus Coprococcus2 id.11302)	TRUE
10	129715759	-0.066536	0.0147661	8.25962e-06	14306	ebi-a-GCST90016984	rs35890118	A	G	NA	Gut microbiota abundance (genus Coprococcus2 id.11302)	TRUE
14	86833255	0.0665288	0.0138558	1.57692e-06	14306	ebi-a-GCST90016984	rs1958519	T	A	NA	Gut microbiota abundance (genus Coprococcus2 id.11302)	TRUE
20	49266770	0.117085	0.0233995	9.3754e-07	14306	ebi-a-GCST90016984	rs59936925	A	T	NA	Gut microbiota abundance (genus Coprococcus2 id.11302)	TRUE
1	178945043	-0.0703062	0.0153954	5.49693e-06	14306	ebi-a-GCST90017088	rs6656807	G	A	NA	Gut microbiota abundance (genus Veillonella id.2198)	TRUE
3	125544032	-0.0761385	0.0164228	3.11803e-06	14306	ebi-a-GCST90017088	rs7645873	T	A	NA	Gut microbiota abundance (genus Veillonella id.2198)	TRUE
5	119914285	-0.0762216	0.0163499	3.65452e-06	14306	ebi-a-GCST90017088	rs62376424	C	T	NA	Gut microbiota abundance (genus Veillonella id.2198)	TRUE
8	13253770	-0.0793499	0.0164818	1.77578e-06	14306	ebi-a-GCST90017088	rs12679709	C	G	NA	Gut microbiota abundance (genus Veillonella id.2198)	TRUE
9	89306305	-0.0783421	0.0174393	9.74653e-06	14306	ebi-a-GCST90017088	rs11141494	G	A	NA	Gut microbiota abundance (genus Veillonella id.2198)	TRUE
11	2956783	0.107329	0.0237633	5.5143e-06	14306	ebi-a-GCST90017088	rs55807413	A	G	NA	Gut microbiota abundance (genus Veillonella id.2198)	TRUE
11	44302154	0.0720698	0.0155153	3.42129e-06	14306	ebi-a-GCST90017088	rs2013594	C	T	NA	Gut microbiota abundance (genus Veillonella id.2198)	TRUE
12	129984555	0.0744538	0.0165214	7.1264e-06	14306	ebi-a-GCST90017088	rs11614532	G	C	NA	Gut microbiota abundance (genus Veillonella id.2198)	TRUE
14	106939916	-0.135391	0.030352	7.39895e-06	14306	ebi-a-GCST90017088	rs7359080	C	A	NA	Gut microbiota abundance (genus Veillonella id.2198)	TRUE
21	30010673	-0.0768966	0.0163908	2.98092e-06	14306	ebi-a-GCST90017088	rs1882878	A	G	NA	Gut microbiota abundance (genus Veillonella id.2198)	TRUE
22	45604800	-0.0688571	0.0149769	4.65693e-06	14306	ebi-a-GCST90017088	rs742016	A	G	NA	Gut microbiota abundance (genus Veillonella id.2198)	TRUE
1	83252771	0.110967	0.0250498	8.84993e-06	14306	ebi-a-GCST90016980	rs11586026	A	T	NA	Gut microbiota abundance (genus Clostridium sensustricto1 id.1873)	TRUE
1	3041519	0.058139	0.0124492	2.76656e-06	14306	ebi-a-GCST90016980	rs2817172	C	T	NA	Gut microbiota abundance (genus Clostridium sensustricto1 id.1873)	TRUE
1	155676492	-0.139061	0.0334454	7.7555e-06	14306	ebi-a-GCST90016980	rs11264403	G	A	NA	Gut microbiota abundance (genus Clostridium sensustricto1 id.1873)	TRUE
3	111482845	-0.0616879	0.0137581	7.49463e-06	14306	ebi-a-GCST90016980	rs12490337	C	G	NA	Gut microbiota abundance (genus Clostridium sensustricto1 id.1873)	TRUE
5	84997131	-0.22736	0.0492575	4.31688e-06	14306	ebi-a-GCST90016980	rs115807074	A	G	NA	Gut microbiota abundance (genus Clostridium sensustricto1 id.1873)	TRUE
6	165722832	-0.0783246	0.0169209	2.05069e-06	14306	ebi-a-GCST90016980	rs550843	T	C	NA	Gut microbiota abundance (genus Clostridium sensustricto1 id.1873)	TRUE
9	136710881	0.0810718	0.0180121	4.8217e-06	14306	ebi-a-GCST90016980	rs12341505	G	A	NA	Gut microbiota abundance (genus Clostridium sensustricto1 id.1873)	TRUE
10	43270264	-0.184315	0.0392204	2.72038e-06	14306	ebi-a-GCST90016980	rs2795528	G	A	NA	Gut microbiota abundance (genus Clostridium sensustricto1 id.1873)	TRUE
12	43485015	0.110021	0.0246032	4.58121e-06	14306	ebi-a-GCST90016980	rs116847295	C	T	NA	Gut microbiota abundance (genus Clostridium sensustricto1 id.1873)	TRUE
1	203308383	-0.0705516	0.0150849	5.67884e-06	14306	ebi-a-GCST90016915	rs16851319	G	C	NA	Gut microbiota abundance (class Deltaproteobacteria id.3087)	TRUE
1	203991605	-0.110335	0.0253336	3.14188e-06	14306	ebi-a-GCST90016915	rs2692012	G	A	NA	Gut microbiota abundance (class Deltaproteobacteria id.3087)	TRUE
2	233929283	-0.0523484	0.011566	7.50119e-06	14306	ebi-a-GCST90016915	rs3935584	C	T	NA	Gut microbiota abundance (class Deltaproteobacteria id.3087)	TRUE
8	57867671	-0.0779693	0.0170738	7.31375e-06	14306	ebi-a-GCST90016915	rs55744759	A	G	NA	Gut microbiota abundance (class Deltaproteobacteria id.3087)	TRUE
9	15269705	0.206594	0.0456908	4.63052e-06	14306	ebi-a-GCST90016915	rs112381107	C	T	NA	Gut microbiota abundance (class Deltaproteobacteria id.3087)	TRUE
9	81834426	-0.0735881	0.0154246	1.60221e-06	14306	ebi-a-GCST90016915	rs17791387	A	G	NA	Gut microbiota abundance (class Deltaproteobacteria id.3087)	TRUE
10	11855599	0.0544219	0.0117397	3.94121e-06	14306	ebi-a-GCST90016915	rs11599763	C	T	NA	Gut microbiota abundance (class Deltaproteobacteria id.3087)	TRUE
11	10658735	0.055176	0.0121602	9.65162e-06	14306	ebi-a-GCST90016915	rs1035691	G	A	NA	Gut microbiota abundance (class Deltaproteobacteria id.3087)	TRUE
15	96161065	-0.0585411	0.0129358	4.85087e-06	14306	ebi-a-GCST90016915	rs62020470	A	G	NA	Gut microbiota abundance (class Deltaproteobacteria id.3087)	TRUE
16	71541641	-0.0538457	0.0117718	5.02077e-06	14306	ebi-a-GCST90016915	rs9928243	C	A	NA	Gut microbiota abundance (class Deltaproteobacteria id.3087)	TRUE
17	2856662	-0.0936514	0.02012	3.58889e-06	14306	ebi-a-GCST90016915	rs4506934	C	T	NA	Gut microbiota abundance (class Deltaproteobacteria id.3087)	TRUE
18	69312914	-0.0710762	0.015953	5.6863e-06	14306	ebi-a-GCST90016915	rs17084793	G	A	NA	Gut microbiota abundance (class Deltaproteobacteria id.3087)	TRUE
20	33694801	0.0825716	0.0165958	3.39555e-07	14306	ebi-a-GCST90016915	rs6058181	C	T	NA	Gut microbiota abundance (class Deltaproteobacteria id.3087)	TRUE
21	45064961	0.0561722	0.0124124	5.44553e-06	14306	ebi-a-GCST90016915	rs2838334	G	A	NA	Gut microbiota abundance (class Deltaproteobacteria id.3087)	TRUE
1	97457427	-0.0497374	0.0111376	8.02897e-06	14306	ebi-a-GCST90017099	rs290833	T	G	NA	Gut microbiota abundance (order Erysipelotrichales id.2148)	TRUE
1	64139196	-0.0475363	0.0106939	9.52708e-06	14306	ebi-a-GCST90017099	rs1884466	C	T	NA	Gut microbiota abundance (order Erysipelotrichales id.2148)	TRUE
3	195793712	-0.0524152	0.0106784	8.95468e-07	14306	ebi-a-GCST90017099	rs2300774	A	G	NA	Gut microbiota abundance (order Erysipelotrichales id.2148)	TRUE
5	3002546	-0.0492438	0.010887	6.14582e-06	14306	ebi-a-GCST90017099	rs1074800	G	A	NA	Gut microbiota abundance (order Erysipelotrichales id.2148)	TRUE
8	38803551	0.0681159	0.0127883	1.12264e-07	14306	ebi-a-GCST90017099	rs62504403	C	T	NA	Gut microbiota abundance (order Erysipelotrichales id.2148)	TRUE
8	2954952	0.0839071	0.0199131	9.28453e-06	14306	ebi-a-GCST90017099	rs7826267	G	T	NA	Gut microbiota abundance (order Erysipelotrichales id.2148)	TRUE
10	133897233	-0.0552212	0.0116074	2.33115e-06	14306	ebi-a-GCST90017099	rs10781552	C	T	NA	Gut microbiota abundance (order Erysipelotrichales id.2148)	TRUE
13	40385457	0.10305	0.0224648	2.79126e-06	14306	ebi-a-GCST90017099	rs17530232	A	G	NA	Gut microbiota abundance (order Erysipelotrichales id.2148)	TRUE
14	80357610	0.0724145	0.0164471	5.40344e-06	14306	ebi-a-GCST90017099	rs56970041	T	G	NA	Gut microbiota abundance (order Erysipelotrichales id.2148)	TRUE
14	56156504	0.0538798	0.0116888	4.08479e-06	14306	ebi-a-GCST90017099	rs8003149	C	T	NA	Gut microbiota abundance (order Erysipelotrichales id.2148)	TRUE
14	48997206	0.0608929	0.0133764	4.23107e-06	14306	ebi-a-GCST90017099	rs4078432	T	C	NA	Gut microbiota abundance (order Erysipelotrichales id.2148)	TRUE
17	70327224	-0.0806041	0.0167641	1.8451e-06	14306	ebi-a-GCST90017099	rs35161940	T	C	NA	Gut microbiota abundance (order Erysipelotrichales id.2148)	TRUE
18	5830507	-0.0945759	0.0194091	9.12347e-07	14306	ebi-a-GCST90017099	rs7234058	T	C	NA	Gut microbiota abundance (order Erysipelotrichales id.2148)	TRUE
1	109965986	0.0681052	0.0149061	4.2335e-06	14306	ebi-a-GCST90016921	rs3768491	G	A	NA	Gut microbiota abundance (class Mollicutes id.3920)	TRUE
1	61850864	-0.101147	0.0230978	3.65098e-06	14306	ebi-a-GCST90016921	rs12566890	T	G	NA	Gut microbiota abundance (class Mollicutes id.3920)	TRUE
2	157532549	0.074438	0.0153389	9.56577e-07	14306	ebi-a-GCST90016921	rs11890098	A	G	NA	Gut microbiota abundance (class Mollicutes id.3920)	TRUE
7	79490250	0.0944239	0.0211806	8.39499e-06	14306	ebi-a-GCST90016921	rs2464826	A	C	NA	Gut microbiota abundance (class Mollicutes id.3920)	TRUE
8	59440824	0.0769142	0.0153953	1.09001e-06	14306	ebi-a-GCST90016921	rs10108398	G	A	NA	Gut microbiota abundance (class Mollicutes id.3920)	TRUE
11	47103877	-0.0841852	0.0178119	3.25792e-06	14306	ebi-a-GCST90016921	rs72901605	T	C	NA	Gut microbiota abundance (class Mollicutes id.3920)	TRUE
11	108439087	-0.108283	0.0237289	5.87611e-06	14306	ebi-a-GCST90016921	rs78169027	A	G	NA	Gut microbiota abundance (class Mollicutes id.3920)	TRUE
13	73170489	0.0819606	0.0181628	7.26993e-06	14306	ebi-a-GCST90016921	rs4885016	C	T	NA	Gut microbiota abundance (class Mollicutes id.3920)	TRUE
14	46519718	0.221639	0.0462918	1.5569e-06	14306	ebi-a-GCST90016921	rs74603314	T	C	NA	Gut microbiota abundance (class Mollicutes id.3920)	TRUE
14	97159674	0.06099	0.0135623	6.60861e-06	14306	ebi-a-GCST90016921	rs17214486	C	A	NA	Gut microbiota abundance (class Mollicutes id.3920)	TRUE
15	95309676	0.0820873	0.0188312	8.07402e-06	14306	ebi-a-GCST90016921	rs28537087	G	A	NA	Gut microbiota abundance (class Mollicutes id.3920)	TRUE
20	16259524	-0.114937	0.0248606	4.55481e-06	14306	ebi-a-GCST90016921	rs6043847	T	C	NA	Gut microbiota abundance (class Mollicutes id.3920)	TRUE
1	195064019	-0.0893273	0.0198333	5.79522e-06	14306	ebi-a-GCST90017002	rs12129908	A	C	NA	Gut microbiota abundance (genus Eubacterium oxidoreducens group id.11339)	TRUE
4	37526679	0.0923559	0.0195439	2.38836e-06	14306	ebi-a-GCST90017002	rs2973294	G	T	NA	Gut microbiota abundance (genus Eubacterium oxidoreducens group id.11339)	TRUE
4	187905399	-0.0906104	0.0200612	7.32285e-06	14306	ebi-a-GCST90017002	rs1425962	C	G	NA	Gut microbiota abundance (genus Eubacterium oxidoreducens group id.11339)	TRUE
5	106882394	-0.0932766	0.0195294	1.65406e-06	14306	ebi-a-GCST90017002	rs440215	T	C	NA	Gut microbiota abundance (genus Eubacterium oxidoreducens group id.11339)	TRUE
12	94515340	0.14098	0.0295029	2.62924e-06	14306	ebi-a-GCST90017002	rs12423772	G	T	NA	Gut microbiota abundance (genus Eubacterium oxidoreducens group id.11339)	TRUE
16	86480355	0.216145	0.045992	2.51166e-06	14306	ebi-a-GCST90017002	rs34561138	G	A	NA	Gut microbiota abundance (genus Eubacterium oxidoreducens group id.11339)	TRUE
2	20054971	0.0583322	0.0130729	7.85037e-06	14306	ebi-a-GCST90017018	rs893394	G	A	NA	Gut microbiota abundance (genus Intestinibacter id.11345)	TRUE
3	70657785	0.0662258	0.0149877	9.25763e-06	14306	ebi-a-GCST90017018	rs68093214	C	T	NA	Gut microbiota abundance (genus Intestinibacter id.11345)	TRUE
4	179361262	-0.0608559	0.0132145	4.25991e-06	14306	ebi-a-GCST90017018	rs2702387	G	A	NA	Gut microbiota abundance (genus Intestinibacter id.11345)	TRUE
4	14324623	-0.0775151	0.0139665	3.54544e-08	14306	ebi-a-GCST90017018	rs10805326	A	G	NA	Gut microbiota abundance (genus Intestinibacter id.11345)	TRUE
5	159686256	0.0890455	0.0193905	3.05781e-06	14306	ebi-a-GCST90017018	rs6875660	C	T	NA	Gut microbiota abundance (genus Intestinibacter id.11345)	TRUE
5	148846426	0.0628342	0.0136652	5.6391e-06	14306	ebi-a-GCST90017018	rs447950	A	G	NA	Gut microbiota abundance (genus Intestinibacter id.11345)	TRUE
6	10303945	0.099082	0.0221625	6.25936e-06	14306	ebi-a-GCST90017018	rs9348442	C	T	NA	Gut microbiota abundance (genus Intestinibacter id.11345)	TRUE
6	170918194	0.151096	0.0351476	6.84227e-06	14306	ebi-a-GCST90017018	rs62430350	T	C	NA	Gut microbiota abundance (genus Intestinibacter id.11345)	TRUE
9	21502923	-0.112189	0.0235439	1.80098e-06	14306	ebi-a-GCST90017018	rs16938435	T	C	NA	Gut microbiota abundance (genus Intestinibacter id.11345)	TRUE
11	127703160	0.0575295	0.0128416	6.78875e-06	14306	ebi-a-GCST90017018	rs2098844	T	C	NA	Gut microbiota abundance (genus Intestinibacter id.11345)	TRUE
11	125663184	0.142681	0.0297116	1.81991e-06	14306	ebi-a-GCST90017018	rs478972	C	T	NA	Gut microbiota abundance (genus Intestinibacter id.11345)	TRUE
12	97928437	-0.0624272	0.0138539	5.4949e-06	14306	ebi-a-GCST90017018	rs11109097	T	C	NA	Gut microbiota abundance (genus Intestinibacter id.11345)	TRUE
15	92446683	-0.0810346	0.0154397	1.64327e-07	14306	ebi-a-GCST90017018	rs4327025	G	A	NA	Gut microbiota abundance (genus Intestinibacter id.11345)	TRUE
16	5993076	-0.151829	0.0324471	2.67436e-06	14306	ebi-a-GCST90017018	rs118030283	G	A	NA	Gut microbiota abundance (genus Intestinibacter id.11345)	TRUE
20	61325223	0.0924508	0.0204658	6.6799e-06	14306	ebi-a-GCST90017018	rs6062862	A	G	NA	Gut microbiota abundance (genus Intestinibacter id.11345)	TRUE
2	102126220	0.084254	0.0196297	9.9977e-06	14306	ebi-a-GCST90017095	rs290772	G	A	NA	Gut microbiota abundance (order Clostridiales id.1863)	TRUE
2	231676041	0.0795424	0.0182427	9.59555e-06	14306	ebi-a-GCST90017095	rs10209007	G	C	NA	Gut microbiota abundance (order Clostridiales id.1863)	TRUE
3	12870886	0.0547729	0.0124169	9.62565e-06	14306	ebi-a-GCST90017095	rs6442336	T	C	NA	Gut microbiota abundance (order Clostridiales id.1863)	TRUE
3	131371980	0.0699806	0.0156318	8.17561e-06	14306	ebi-a-GCST90017095	rs76767978	G	A	NA	Gut microbiota abundance (order Clostridiales id.1863)	TRUE
4	161507301	-0.0741858	0.0150814	9.06296e-07	14306	ebi-a-GCST90017095	rs6814436	C	T	NA	Gut microbiota abundance (order Clostridiales id.1863)	TRUE
4	152131744	-0.104089	0.0210883	3.71989e-07	14306	ebi-a-GCST90017095	rs6815608	C	T	NA	Gut microbiota abundance (order Clostridiales id.1863)	TRUE
4	7420184	0.0527441	0.011818	9.36807e-06	14306	ebi-a-GCST90017095	rs13105690	C	T	NA	Gut microbiota abundance (order Clostridiales id.1863)	TRUE
5	35770550	0.0865333	0.0190392	8.4157e-06	14306	ebi-a-GCST90017095	rs72738886	T	C	NA	Gut microbiota abundance (order Clostridiales id.1863)	TRUE
5	149077788	-0.0510953	0.0109569	3.52111e-06	14306	ebi-a-GCST90017095	rs13179700	C	T	NA	Gut microbiota abundance (order Clostridiales id.1863)	TRUE
5	105060362	-0.0543676	0.012734	9.91745e-06	14306	ebi-a-GCST90017095	rs1842454	G	A	NA	Gut microbiota abundance (order Clostridiales id.1863)	TRUE
6	163743050	0.0522397	0.0116116	7.0948e-06	14306	ebi-a-GCST90017095	rs6934062	G	C	NA	Gut microbiota abundance (order Clostridiales id.1863)	TRUE
6	12397187	0.094122	0.0225117	8.58163e-06	14306	ebi-a-GCST90017095	rs76860606	C	G	NA	Gut microbiota abundance (order Clostridiales id.1863)	TRUE
12	5942519	-0.0523003	0.0113859	3.80899e-06	14306	ebi-a-GCST90017095	rs10774377	G	A	NA	Gut microbiota abundance (order Clostridiales id.1863)	TRUE
14	52494072	-0.0726191	0.0153105	4.16869e-06	14306	ebi-a-GCST90017095	rs2273429	A	G	NA	Gut microbiota abundance (order Clostridiales id.1863)	TRUE
18	48792829	-0.0580246	0.0120558	1.39104e-06	14306	ebi-a-GCST90017095	rs72915163	T	C	NA	Gut microbiota abundance (order Clostridiales id.1863)	TRUE
20	50803760	-0.0965346	0.0212006	8.84341e-06	14306	ebi-a-GCST90017095	rs7269302	A	T	NA	Gut microbiota abundance (order Clostridiales id.1863)	TRUE
21	40703251	0.0639383	0.0127404	4.07258e-07	14306	ebi-a-GCST90017095	rs112334273	G	A	NA	Gut microbiota abundance (order Clostridiales id.1863)	TRUE
21	18567802	-0.255441	0.0508788	8.95385e-07	14306	ebi-a-GCST90017095	rs992074	T	C	NA	Gut microbiota abundance (order Clostridiales id.1863)	TRUE
6	129224488	0.106544	0.0200323	1.46913e-07	14306	ebi-a-GCST90017013	rs12191680	C	G	NA	Gut microbiota abundance (genus Haemophilus id.3698)	TRUE
6	8350917	0.0723095	0.0148799	1.42269e-06	14306	ebi-a-GCST90017013	rs9328464	T	C	NA	Gut microbiota abundance (genus Haemophilus id.3698)	TRUE
6	55448491	-0.093521	0.0172649	7.12049e-08	14306	ebi-a-GCST90017013	rs9382510	C	T	NA	Gut microbiota abundance (genus Haemophilus id.3698)	TRUE
7	24360361	-0.108393	0.0247052	7.23236e-06	14306	ebi-a-GCST90017013	rs56310940	G	C	NA	Gut microbiota abundance (genus Haemophilus id.3698)	TRUE
9	78752170	-0.0948915	0.0203221	4.32265e-06	14306	ebi-a-GCST90017013	rs10781340	A	G	NA	Gut microbiota abundance (genus Haemophilus id.3698)	TRUE
9	105650242	-0.246256	0.0503924	1.66744e-06	14306	ebi-a-GCST90017013	rs78909003	T	C	NA	Gut microbiota abundance (genus Haemophilus id.3698)	TRUE
10	94306385	0.244638	0.0505504	1.83033e-06	14306	ebi-a-GCST90017013	rs76022354	C	T	NA	Gut microbiota abundance (genus Haemophilus id.3698)	TRUE
11	9951672	-0.0677384	0.0151463	7.36529e-06	14306	ebi-a-GCST90017013	rs10840326	C	G	NA	Gut microbiota abundance (genus Haemophilus id.3698)	TRUE
12	115493337	0.128249	0.0268779	2.00951e-06	14306	ebi-a-GCST90017013	rs35509	G	A	NA	Gut microbiota abundance (genus Haemophilus id.3698)	TRUE
13	85114550	0.0749201	0.016711	9.62498e-06	14306	ebi-a-GCST90017013	rs12876183	T	A	NA	Gut microbiota abundance (genus Haemophilus id.3698)	TRUE
13	36104947	-0.0736375	0.0155227	2.18022e-06	14306	ebi-a-GCST90017013	rs9574096	A	T	NA	Gut microbiota abundance (genus Haemophilus id.3698)	TRUE
16	48742489	-0.124265	0.026016	1.27347e-06	14306	ebi-a-GCST90017013	rs111582866	G	A	NA	Gut microbiota abundance (genus Haemophilus id.3698)	TRUE
17	64535013	-0.192957	0.0416755	2.14062e-06	14306	ebi-a-GCST90017013	rs9895850	T	C	NA	Gut microbiota abundance (genus Haemophilus id.3698)	TRUE
22	26891808	0.0705861	0.0151388	3.47848e-06	14306	ebi-a-GCST90017013	rs4822728	T	C	NA	Gut microbiota abundance (genus Haemophilus id.3698)	TRUE
1	116887742	0.200758	0.0442121	6.1776e-06	14306	ebi-a-GCST90017031	rs6674304	C	T	NA	Gut microbiota abundance (genus Lactococcus id.1851)	TRUE
2	54114864	-0.199221	0.0430969	1.39592e-06	14306	ebi-a-GCST90017031	rs2293361	C	T	NA	Gut microbiota abundance (genus Lactococcus id.1851)	TRUE
2	31266049	0.108423	0.0239978	6.6083e-06	14306	ebi-a-GCST90017031	rs12621813	G	A	NA	Gut microbiota abundance (genus Lactococcus id.1851)	TRUE
7	14650221	0.191857	0.0424761	6.28608e-06	14306	ebi-a-GCST90017031	rs17168302	G	A	NA	Gut microbiota abundance (genus Lactococcus id.1851)	TRUE
10	71518643	0.146426	0.0307367	2.36211e-06	14306	ebi-a-GCST90017031	rs55910161	C	T	NA	Gut microbiota abundance (genus Lactococcus id.1851)	TRUE
12	113161438	0.114599	0.023839	2.06144e-06	14306	ebi-a-GCST90017031	rs4766997	C	T	NA	Gut microbiota abundance (genus Lactococcus id.1851)	TRUE
13	113472525	-0.104232	0.0230786	4.44723e-06	14306	ebi-a-GCST90017031	rs7992246	C	T	NA	Gut microbiota abundance (genus Lactococcus id.1851)	TRUE
17	2699935	0.13671	0.0274694	1.26561e-06	14306	ebi-a-GCST90017031	rs123059	C	T	NA	Gut microbiota abundance (genus Lactococcus id.1851)	TRUE
18	64699550	0.122294	0.0228976	8.95035e-08	14306	ebi-a-GCST90017031	rs34757988	G	C	NA	Gut microbiota abundance (genus Lactococcus id.1851)	TRUE
19	28767353	-0.118306	0.024522	1.28677e-06	14306	ebi-a-GCST90017031	rs10417872	G	T	NA	Gut microbiota abundance (genus Lactococcus id.1851)	TRUE
22	31532568	-0.140799	0.027582	4.36878e-07	14306	ebi-a-GCST90017031	rs757872	C	G	NA	Gut microbiota abundance (genus Lactococcus id.1851)	TRUE
2	57810406	-0.131341	0.0286292	1.51604e-06	14306	ebi-a-GCST90017075	rs7561370	C	T	NA	Gut microbiota abundance (genus Tyzzerella3 id.11335)	TRUE
5	16388259	-0.140368	0.0274708	5.87814e-07	14306	ebi-a-GCST90017075	rs17706273	T	C	NA	Gut microbiota abundance (genus Tyzzerella3 id.11335)	TRUE
6	5755626	-0.141081	0.0305446	4.15375e-06	14306	ebi-a-GCST90017075	rs6920448	C	T	NA	Gut microbiota abundance (genus Tyzzerella3 id.11335)	TRUE
6	102680257	0.143869	0.031828	7.90788e-06	14306	ebi-a-GCST90017075	rs1232220	T	G	NA	Gut microbiota abundance (genus Tyzzerella3 id.11335)	TRUE
7	82547827	-0.163819	0.0336386	1.54135e-06	14306	ebi-a-GCST90017075	rs17809157	A	T	NA	Gut microbiota abundance (genus Tyzzerella3 id.11335)	TRUE
9	33113322	0.144156	0.0301626	1.76121e-06	14306	ebi-a-GCST90017075	rs7019909	T	C	NA	Gut microbiota abundance (genus Tyzzerella3 id.11335)	TRUE
10	46098286	-0.216348	0.0477575	6.17675e-06	14306	ebi-a-GCST90017075	rs112102233	A	G	NA	Gut microbiota abundance (genus Tyzzerella3 id.11335)	TRUE
11	87588698	0.12238	0.0274683	8.85442e-06	14306	ebi-a-GCST90017075	rs10898797	C	T	NA	Gut microbiota abundance (genus Tyzzerella3 id.11335)	TRUE
12	77390329	0.159008	0.0353306	6.76394e-06	14306	ebi-a-GCST90017075	rs191093	G	A	NA	Gut microbiota abundance (genus Tyzzerella3 id.11335)	TRUE
13	81593016	-0.207191	0.0453121	4.87607e-06	14306	ebi-a-GCST90017075	rs7333521	T	C	NA	Gut microbiota abundance (genus Tyzzerella3 id.11335)	TRUE
13	35023691	-0.184966	0.0383029	1.70675e-06	14306	ebi-a-GCST90017075	rs75091807	G	T	NA	Gut microbiota abundance (genus Tyzzerella3 id.11335)	TRUE
14	89595945	-0.117151	0.0250306	3.09272e-06	14306	ebi-a-GCST90017075	rs4904512	T	C	NA	Gut microbiota abundance (genus Tyzzerella3 id.11335)	TRUE
17	3738781	-0.11435	0.0238604	1.33549e-06	14306	ebi-a-GCST90017075	rs55799124	A	G	NA	Gut microbiota abundance (genus Tyzzerella3 id.11335)	TRUE
19	1030320	0.132164	0.022208	3.7405e-09	14306	ebi-a-GCST90017075	rs67476743	T	G	NA	Gut microbiota abundance (genus Tyzzerella3 id.11335)	TRUE
1	76803093	0.0774322	0.0172216	6.85125e-06	14306	ebi-a-GCST90017037	rs751183	C	T	NA	Gut microbiota abundance (genus Oscillospira id.2064)	TRUE
3	172373615	-0.08321	0.0168666	1.09428e-06	14306	ebi-a-GCST90017037	rs73038677	T	A	NA	Gut microbiota abundance (genus Oscillospira id.2064)	TRUE
4	89483300	0.114051	0.0252838	3.36589e-06	14306	ebi-a-GCST90017037	rs28889936	A	C	NA	Gut microbiota abundance (genus Oscillospira id.2064)	TRUE
6	18093691	-0.133016	0.0269733	1.04222e-06	14306	ebi-a-GCST90017037	rs12206468	G	A	NA	Gut microbiota abundance (genus Oscillospira id.2064)	TRUE
6	56160483	-0.130569	0.0281674	5.62704e-06	14306	ebi-a-GCST90017037	rs72866977	A	C	NA	Gut microbiota abundance (genus Oscillospira id.2064)	TRUE
6	170474630	0.0898456	0.0198088	6.46755e-06	14306	ebi-a-GCST90017037	rs62422654	C	T	NA	Gut microbiota abundance (genus Oscillospira id.2064)	TRUE
14	28151415	0.0826246	0.0175252	2.26772e-06	14306	ebi-a-GCST90017037	rs1954532	C	T	NA	Gut microbiota abundance (genus Oscillospira id.2064)	TRUE
16	89792856	0.13559	0.030678	9.31022e-06	14306	ebi-a-GCST90017037	rs12925026	T	C	NA	Gut microbiota abundance (genus Oscillospira id.2064)	TRUE
17	14881860	0.0715392	0.0156539	5.61319e-06	14306	ebi-a-GCST90017037	rs8076323	A	G	NA	Gut microbiota abundance (genus Oscillospira id.2064)	TRUE
1	246780557	-0.0553508	0.0123588	7.19615e-06	14306	ebi-a-GCST90017006	rs4654122	G	C	NA	Gut microbiota abundance (genus Eubacterium xylanophilum group id.14375)	TRUE
1	22627266	0.0612633	0.0130917	3.15152e-06	14306	ebi-a-GCST90017006	rs10917203	A	C	NA	Gut microbiota abundance (genus Eubacterium xylanophilum group id.14375)	TRUE
4	87891938	-0.114498	0.0263455	9.38707e-06	14306	ebi-a-GCST90017006	rs75586835	A	G	NA	Gut microbiota abundance (genus Eubacterium xylanophilum group id.14375)	TRUE
7	43566344	0.0687427	0.0142728	1.81782e-06	14306	ebi-a-GCST90017006	rs13239072	G	A	NA	Gut microbiota abundance (genus Eubacterium xylanophilum group id.14375)	TRUE
9	130498120	-0.0949051	0.0203503	3.75491e-06	14306	ebi-a-GCST90017006	rs1999224	G	T	NA	Gut microbiota abundance (genus Eubacterium xylanophilum group id.14375)	TRUE
11	131009660	0.0877797	0.0189012	4.21328e-06	14306	ebi-a-GCST90017006	rs2213117	T	G	NA	Gut microbiota abundance (genus Eubacterium xylanophilum group id.14375)	TRUE
14	73181783	0.0576795	0.012599	4.95861e-06	14306	ebi-a-GCST90017006	rs10140184	A	C	NA	Gut microbiota abundance (genus Eubacterium xylanophilum group id.14375)	TRUE
16	73696771	-0.113455	0.0245762	3.32767e-06	14306	ebi-a-GCST90017006	rs112176119	C	T	NA	Gut microbiota abundance (genus Eubacterium xylanophilum group id.14375)	TRUE
16	84790559	-0.0573202	0.0126905	6.52544e-06	14306	ebi-a-GCST90017006	rs2012708	G	A	NA	Gut microbiota abundance (genus Eubacterium xylanophilum group id.14375)	TRUE
17	66689958	-0.0951677	0.0199969	2.40979e-06	14306	ebi-a-GCST90017006	rs79582700	C	G	NA	Gut microbiota abundance (genus Eubacterium xylanophilum group id.14375)	TRUE
19	8255478	-0.108274	0.0238257	5.01938e-06	14306	ebi-a-GCST90017006	rs12980122	C	G	NA	Gut microbiota abundance (genus Eubacterium xylanophilum group id.14375)	TRUE
20	57995506	-0.160597	0.0310515	2.38891e-07	14306	ebi-a-GCST90017006	rs17830032	G	A	NA	Gut microbiota abundance (genus Eubacterium xylanophilum group id.14375)	TRUE
1	29736216	-0.123657	0.0278514	9.71717e-06	14306	ebi-a-GCST90017044	rs9426434	T	C	NA	Gut microbiota abundance (genus Prevotella7 id.11182)	TRUE
1	3343802	-0.121281	0.0275017	9.48986e-06	14306	ebi-a-GCST90017044	rs12124567	A	G	NA	Gut microbiota abundance (genus Prevotella7 id.11182)	TRUE
2	12101762	0.155486	0.0316057	6.2157e-07	14306	ebi-a-GCST90017044	rs57404562	C	A	NA	Gut microbiota abundance (genus Prevotella7 id.11182)	TRUE
2	242066314	0.12085	0.0261776	4.8415e-06	14306	ebi-a-GCST90017044	rs2240542	C	T	NA	Gut microbiota abundance (genus Prevotella7 id.11182)	TRUE
3	60474379	0.139155	0.0297055	2.86847e-06	14306	ebi-a-GCST90017044	rs430270	A	C	NA	Gut microbiota abundance (genus Prevotella7 id.11182)	TRUE
6	91019654	0.196528	0.0442322	8.72811e-06	14306	ebi-a-GCST90017044	rs12195431	T	C	NA	Gut microbiota abundance (genus Prevotella7 id.11182)	TRUE
10	133000320	0.114648	0.0254916	6.42407e-06	14306	ebi-a-GCST90017044	rs2918132	T	C	NA	Gut microbiota abundance (genus Prevotella7 id.11182)	TRUE
11	39821773	-0.143982	0.031501	7.51052e-06	14306	ebi-a-GCST90017044	rs79263163	A	C	NA	Gut microbiota abundance (genus Prevotella7 id.11182)	TRUE
11	19943115	0.146098	0.0351529	9.63696e-06	14306	ebi-a-GCST90017044	rs16937247	G	C	NA	Gut microbiota abundance (genus Prevotella7 id.11182)	TRUE
16	47237609	0.205676	0.0468917	7.85416e-06	14306	ebi-a-GCST90017044	rs118038478	A	G	NA	Gut microbiota abundance (genus Prevotella7 id.11182)	TRUE
18	71442664	0.133012	0.0275361	1.9006e-06	14306	ebi-a-GCST90017044	rs9959718	G	A	NA	Gut microbiota abundance (genus Prevotella7 id.11182)	TRUE
22	24613952	-0.158213	0.0336317	2.06685e-06	14306	ebi-a-GCST90017044	rs9608249	A	G	NA	Gut microbiota abundance (genus Prevotella7 id.11182)	TRUE
1	34529736	-0.130234	0.0292347	7.20676e-06	14306	ebi-a-GCST90017001	rs9425984	T	C	NA	Gut microbiota abundance (genus Eubacterium nodatum group id.11297)	TRUE
1	171060821	-0.125454	0.0275303	6.8388e-06	14306	ebi-a-GCST90017001	rs7880204	T	C	NA	Gut microbiota abundance (genus Eubacterium nodatum group id.11297)	TRUE
4	94712747	0.110081	0.0245964	7.82546e-06	14306	ebi-a-GCST90017001	rs6818880	G	A	NA	Gut microbiota abundance (genus Eubacterium nodatum group id.11297)	TRUE
7	135052348	-0.187753	0.041969	8.3672e-06	14306	ebi-a-GCST90017001	rs10458299	T	C	NA	Gut microbiota abundance (genus Eubacterium nodatum group id.11297)	TRUE
7	64894137	0.193496	0.0439023	8.90697e-06	14306	ebi-a-GCST90017001	rs10263623	C	T	NA	Gut microbiota abundance (genus Eubacterium nodatum group id.11297)	TRUE
8	4954912	0.1223	0.0271331	7.17348e-06	14306	ebi-a-GCST90017001	rs7827125	C	T	NA	Gut microbiota abundance (genus Eubacterium nodatum group id.11297)	TRUE
9	28245518	-0.185107	0.0403573	5.75705e-06	14306	ebi-a-GCST90017001	rs113893692	C	T	NA	Gut microbiota abundance (genus Eubacterium nodatum group id.11297)	TRUE
9	96597985	0.201788	0.0413568	9.05378e-07	14306	ebi-a-GCST90017001	rs77910827	C	T	NA	Gut microbiota abundance (genus Eubacterium nodatum group id.11297)	TRUE
10	61322015	-0.110167	0.024593	7.98656e-06	14306	ebi-a-GCST90017001	rs11006576	A	G	NA	Gut microbiota abundance (genus Eubacterium nodatum group id.11297)	TRUE
10	9659749	0.160621	0.0341609	3.56139e-06	14306	ebi-a-GCST90017001	rs61841040	G	T	NA	Gut microbiota abundance (genus Eubacterium nodatum group id.11297)	TRUE
14	52185888	-0.186907	0.0341475	6.59781e-08	14306	ebi-a-GCST90017001	rs34297067	A	G	NA	Gut microbiota abundance (genus Eubacterium nodatum group id.11297)	TRUE
3	60615680	0.0788638	0.0176744	8.38147e-06	14306	ebi-a-GCST90017015	rs967319	T	C	NA	Gut microbiota abundance (genus Holdemania id.2157)	TRUE
5	106209093	0.079488	0.0177002	7.2297e-06	14306	ebi-a-GCST90017015	rs4146507	C	T	NA	Gut microbiota abundance (genus Holdemania id.2157)	TRUE
5	77388406	0.164556	0.0341775	1.77468e-06	14306	ebi-a-GCST90017015	rs77293403	A	G	NA	Gut microbiota abundance (genus Holdemania id.2157)	TRUE
6	105737322	0.0926764	0.0178886	4.08517e-07	14306	ebi-a-GCST90017015	rs9500080	C	T	NA	Gut microbiota abundance (genus Holdemania id.2157)	TRUE
7	38292857	-0.0660617	0.0149427	9.51853e-06	14306	ebi-a-GCST90017015	rs12701617	A	G	NA	Gut microbiota abundance (genus Holdemania id.2157)	TRUE
7	63323145	-0.148594	0.0327469	7.77177e-06	14306	ebi-a-GCST90017015	rs73139538	G	A	NA	Gut microbiota abundance (genus Holdemania id.2157)	TRUE
8	123973840	-0.128935	0.0282526	9.35729e-06	14306	ebi-a-GCST90017015	rs113593397	A	G	NA	Gut microbiota abundance (genus Holdemania id.2157)	TRUE
10	115332413	-0.135137	0.0301894	8.59825e-06	14306	ebi-a-GCST90017015	rs10885477	T	C	NA	Gut microbiota abundance (genus Holdemania id.2157)	TRUE
10	129908282	-0.232987	0.0519183	6.04213e-06	14306	ebi-a-GCST90017015	rs80149660	C	T	NA	Gut microbiota abundance (genus Holdemania id.2157)	TRUE
11	18768068	0.0842919	0.0162192	2.7388e-07	14306	ebi-a-GCST90017015	rs1867876	T	C	NA	Gut microbiota abundance (genus Holdemania id.2157)	TRUE
12	39589195	0.162139	0.0332089	2.37766e-06	14306	ebi-a-GCST90017015	rs150096134	T	A	NA	Gut microbiota abundance (genus Holdemania id.2157)	TRUE
13	81685543	-0.13755	0.0293386	2.34477e-06	14306	ebi-a-GCST90017015	rs116500994	G	T	NA	Gut microbiota abundance (genus Holdemania id.2157)	TRUE
13	70856516	-0.074038	0.0160494	5.96664e-06	14306	ebi-a-GCST90017015	rs9529719	C	T	NA	Gut microbiota abundance (genus Holdemania id.2157)	TRUE
14	102553414	-0.124871	0.0270129	2.44433e-06	14306	ebi-a-GCST90017015	rs41438744	C	G	NA	Gut microbiota abundance (genus Holdemania id.2157)	TRUE
15	93110222	0.120677	0.0265781	3.70775e-06	14306	ebi-a-GCST90017015	rs111745969	A	G	NA	Gut microbiota abundance (genus Holdemania id.2157)	TRUE
17	26789271	-0.0665238	0.0149837	6.66884e-06	14306	ebi-a-GCST90017015	rs11080063	G	A	NA	Gut microbiota abundance (genus Holdemania id.2157)	TRUE
17	76443497	0.128671	0.0282795	5.89196e-06	14306	ebi-a-GCST90017015	rs55888180	C	G	NA	Gut microbiota abundance (genus Holdemania id.2157)	TRUE
20	3839754	0.0910829	0.0178561	5.16928e-07	14306	ebi-a-GCST90017015	rs6133067	T	C	NA	Gut microbiota abundance (genus Holdemania id.2157)	TRUE
3	172950553	0.0572304	0.0127279	7.36936e-06	14306	ebi-a-GCST90017023	rs2861203	G	A	NA	Gut microbiota abundance (genus Lachnospiraceae ND3007 group id.11317)	TRUE
4	7678735	-0.0636978	0.0142041	4.47806e-06	14306	ebi-a-GCST90017023	rs13110238	C	G	NA	Gut microbiota abundance (genus Lachnospiraceae ND3007 group id.11317)	TRUE
10	14137663	-0.0647067	0.014797	8.71686e-06	14306	ebi-a-GCST90017023	rs72776675	T	C	NA	Gut microbiota abundance (genus Lachnospiraceae ND3007 group id.11317)	TRUE
16	1100633	-0.0561864	0.0115984	1.24882e-06	14306	ebi-a-GCST90017023	rs9932954	A	G	NA	Gut microbiota abundance (genus Lachnospiraceae ND3007 group id.11317)	TRUE
1	111161677	0.083936	0.0167936	5.4968e-07	14306	ebi-a-GCST90016948	rs3860225	A	G	NA	Gut microbiota abundance (family Prevotellaceae id.960)	TRUE
1	210681370	-0.0751986	0.0147265	5.5423e-07	14306	ebi-a-GCST90016948	rs12118202	T	C	NA	Gut microbiota abundance (family Prevotellaceae id.960)	TRUE
1	99470269	0.0589878	0.0132268	8.9747e-06	14306	ebi-a-GCST90016948	rs12057990	C	T	NA	Gut microbiota abundance (family Prevotellaceae id.960)	TRUE
2	118910912	-0.0604992	0.0118027	3.02315e-07	14306	ebi-a-GCST90016948	rs4493272	T	C	NA	Gut microbiota abundance (family Prevotellaceae id.960)	TRUE
3	4864877	-0.0679529	0.0145407	2.77192e-06	14306	ebi-a-GCST90016948	rs4685827	T	C	NA	Gut microbiota abundance (family Prevotellaceae id.960)	TRUE
3	32408916	0.0554249	0.0123265	8.43587e-06	14306	ebi-a-GCST90016948	rs2278540	G	A	NA	Gut microbiota abundance (family Prevotellaceae id.960)	TRUE
3	170126707	0.084515	0.0179163	2.08027e-06	14306	ebi-a-GCST90016948	rs148376875	T	G	NA	Gut microbiota abundance (family Prevotellaceae id.960)	TRUE
3	71801830	-0.0539768	0.0119687	7.39486e-06	14306	ebi-a-GCST90016948	rs13069367	A	C	NA	Gut microbiota abundance (family Prevotellaceae id.960)	TRUE
5	180283881	-0.0805894	0.0178291	7.40321e-06	14306	ebi-a-GCST90016948	rs34660375	A	G	NA	Gut microbiota abundance (family Prevotellaceae id.960)	TRUE
8	23714609	-0.0564199	0.0124655	8.60578e-06	14306	ebi-a-GCST90016948	rs3758087	C	T	NA	Gut microbiota abundance (family Prevotellaceae id.960)	TRUE
11	119712522	-0.1567	0.0347882	5.60144e-06	14306	ebi-a-GCST90016948	rs34071565	T	A	NA	Gut microbiota abundance (family Prevotellaceae id.960)	TRUE
12	21404832	-0.0601448	0.0135454	7.59451e-06	14306	ebi-a-GCST90016948	rs7975087	C	A	NA	Gut microbiota abundance (family Prevotellaceae id.960)	TRUE
13	105075823	0.0592681	0.0127329	2.58988e-06	14306	ebi-a-GCST90016948	rs9586501	G	A	NA	Gut microbiota abundance (family Prevotellaceae id.960)	TRUE
14	78643095	0.0701212	0.0158326	8.60815e-06	14306	ebi-a-GCST90016948	rs10131942	C	G	NA	Gut microbiota abundance (family Prevotellaceae id.960)	TRUE
14	33706908	0.229046	0.0483124	9.29929e-07	14306	ebi-a-GCST90016948	rs912860	A	G	NA	Gut microbiota abundance (family Prevotellaceae id.960)	TRUE
18	63018983	-0.0914807	0.0173611	1.06324e-07	14306	ebi-a-GCST90016948	rs9958960	G	A	NA	Gut microbiota abundance (family Prevotellaceae id.960)	TRUE
19	17460999	0.0740876	0.0161926	5.56583e-06	14306	ebi-a-GCST90016948	rs7252711	G	A	NA	Gut microbiota abundance (family Prevotellaceae id.960)	TRUE
20	9771109	-0.0569105	0.0117486	1.30377e-06	14306	ebi-a-GCST90016948	rs2206482	T	G	NA	Gut microbiota abundance (family Prevotellaceae id.960)	TRUE
1	54578401	-0.0520656	0.0109082	1.78201e-06	14306	ebi-a-GCST90017024	rs954878	A	G	NA	Gut microbiota abundance (genus Lachnospiraceae NK4A136 group id.11319)	TRUE
3	55181375	-0.0492283	0.0109388	7.05424e-06	14306	ebi-a-GCST90017024	rs4955932	T	C	NA	Gut microbiota abundance (genus Lachnospiraceae NK4A136 group id.11319)	TRUE
3	190415145	-0.230542	0.0483465	2.77389e-06	14306	ebi-a-GCST90017024	rs7616165	G	T	NA	Gut microbiota abundance (genus Lachnospiraceae NK4A136 group id.11319)	TRUE
3	161749981	-0.22973	0.0499776	2.93089e-06	14306	ebi-a-GCST90017024	rs76193507	A	G	NA	Gut microbiota abundance (genus Lachnospiraceae NK4A136 group id.11319)	TRUE
5	90289997	0.0936162	0.0207982	9.45388e-06	14306	ebi-a-GCST90017024	rs59805249	T	C	NA	Gut microbiota abundance (genus Lachnospiraceae NK4A136 group id.11319)	TRUE
5	6116659	-0.0513831	0.0108094	2.12197e-06	14306	ebi-a-GCST90017024	rs160061	G	A	NA	Gut microbiota abundance (genus Lachnospiraceae NK4A136 group id.11319)	TRUE
7	8497922	0.0487709	0.0109614	9.08113e-06	14306	ebi-a-GCST90017024	rs10952110	G	T	NA	Gut microbiota abundance (genus Lachnospiraceae NK4A136 group id.11319)	TRUE
8	84735080	0.0508285	0.0110591	9.34329e-06	14306	ebi-a-GCST90017024	rs28540839	A	C	NA	Gut microbiota abundance (genus Lachnospiraceae NK4A136 group id.11319)	TRUE
8	4842929	-0.0714756	0.0151703	3.57084e-06	14306	ebi-a-GCST90017024	rs7832116	A	G	NA	Gut microbiota abundance (genus Lachnospiraceae NK4A136 group id.11319)	TRUE
10	62175024	0.0499621	0.0109693	5.26914e-06	14306	ebi-a-GCST90017024	rs7073658	G	T	NA	Gut microbiota abundance (genus Lachnospiraceae NK4A136 group id.11319)	TRUE
11	3922055	0.0573168	0.0115466	8.0423e-07	14306	ebi-a-GCST90017024	rs12362320	G	C	NA	Gut microbiota abundance (genus Lachnospiraceae NK4A136 group id.11319)	TRUE
14	100177681	-0.0549104	0.0115385	2.36777e-06	14306	ebi-a-GCST90017024	rs68104925	T	C	NA	Gut microbiota abundance (genus Lachnospiraceae NK4A136 group id.11319)	TRUE
17	30016653	0.0599578	0.0134693	5.61423e-06	14306	ebi-a-GCST90017024	rs2880566	T	C	NA	Gut microbiota abundance (genus Lachnospiraceae NK4A136 group id.11319)	TRUE
17	35240097	-0.0524615	0.0116758	5.06512e-06	14306	ebi-a-GCST90017024	rs11263806	A	G	NA	Gut microbiota abundance (genus Lachnospiraceae NK4A136 group id.11319)	TRUE
19	21806125	0.0902532	0.0199652	5.83042e-06	14306	ebi-a-GCST90017024	rs12611395	G	A	NA	Gut microbiota abundance (genus Lachnospiraceae NK4A136 group id.11319)	TRUE
19	51256120	-0.10758	0.0229884	3.57256e-06	14306	ebi-a-GCST90017024	rs73044693	A	G	NA	Gut microbiota abundance (genus Lachnospiraceae NK4A136 group id.11319)	TRUE
1	102960989	-0.0592004	0.0132244	6.73008e-06	14306	ebi-a-GCST90016968	rs1340391	T	C	NA	Gut microbiota abundance (genus Bacteroides id.918)	TRUE
1	10644351	-0.0740746	0.0147633	1.79511e-06	14306	ebi-a-GCST90016968	rs11585893	A	G	NA	Gut microbiota abundance (genus Bacteroides id.918)	TRUE
3	10593224	0.0538565	0.0105251	3.37909e-07	14306	ebi-a-GCST90016968	rs6795673	C	T	NA	Gut microbiota abundance (genus Bacteroides id.918)	TRUE
3	77215327	-0.0488038	0.0107412	5.8626e-06	14306	ebi-a-GCST90016968	rs66710942	T	C	NA	Gut microbiota abundance (genus Bacteroides id.918)	TRUE
3	62019400	-0.0528153	0.0117124	7.64945e-06	14306	ebi-a-GCST90016968	rs2366421	T	A	NA	Gut microbiota abundance (genus Bacteroides id.918)	TRUE
6	29143451	0.0818398	0.0170319	1.2942e-06	14306	ebi-a-GCST90016968	rs28757219	T	A	NA	Gut microbiota abundance (genus Bacteroides id.918)	TRUE
6	41519430	-0.059205	0.0131195	7.48497e-06	14306	ebi-a-GCST90016968	rs13207588	A	G	NA	Gut microbiota abundance (genus Bacteroides id.918)	TRUE
9	112855426	-0.0607475	0.0129865	3.4209e-06	14306	ebi-a-GCST90016968	rs495004	C	G	NA	Gut microbiota abundance (genus Bacteroides id.918)	TRUE
13	24910476	0.0604456	0.0129128	2.12711e-06	14306	ebi-a-GCST90016968	rs9507307	C	T	NA	Gut microbiota abundance (genus Bacteroides id.918)	TRUE
14	22045949	-0.0782325	0.0167634	5.01822e-06	14306	ebi-a-GCST90016968	rs2023437	T	C	NA	Gut microbiota abundance (genus Bacteroides id.918)	TRUE
19	24342250	0.0880978	0.0187002	2.68683e-06	14306	ebi-a-GCST90016968	rs17619981	T	G	NA	Gut microbiota abundance (genus Bacteroides id.918)	TRUE
20	58605432	0.0812515	0.0164479	6.80973e-07	14306	ebi-a-GCST90016968	rs66474973	G	T	NA	Gut microbiota abundance (genus Bacteroides id.918)	TRUE
3	142135117	0.0625312	0.0131735	1.95488e-06	14306	ebi-a-GCST90016922	rs13086907	G	A	NA	Gut microbiota abundance (class Negativicutes id.2164)	TRUE
4	17413426	-0.151829	0.0314932	1.87452e-06	14306	ebi-a-GCST90016922	rs73232831	G	A	NA	Gut microbiota abundance (class Negativicutes id.2164)	TRUE
5	165266628	-0.0565284	0.0112298	4.14601e-07	14306	ebi-a-GCST90016922	rs1643968	T	C	NA	Gut microbiota abundance (class Negativicutes id.2164)	TRUE
7	22817571	0.0501306	0.0105798	2.00111e-06	14306	ebi-a-GCST90016922	rs4722181	T	G	NA	Gut microbiota abundance (class Negativicutes id.2164)	TRUE
7	75609677	0.0529785	0.0119177	9.26296e-06	14306	ebi-a-GCST90016922	rs1135612	G	A	NA	Gut microbiota abundance (class Negativicutes id.2164)	TRUE
8	41231597	0.0502053	0.0108382	2.93326e-06	14306	ebi-a-GCST90016922	rs1447205	C	G	NA	Gut microbiota abundance (class Negativicutes id.2164)	TRUE
9	124912908	0.0777075	0.0168628	2.95474e-06	14306	ebi-a-GCST90016922	rs61249479	A	C	NA	Gut microbiota abundance (class Negativicutes id.2164)	TRUE
10	115597993	0.0543966	0.0129365	7.80657e-06	14306	ebi-a-GCST90016922	rs4463806	C	T	NA	Gut microbiota abundance (class Negativicutes id.2164)	TRUE
10	80086072	0.0748989	0.0166458	7.58124e-06	14306	ebi-a-GCST90016922	rs1649999	A	G	NA	Gut microbiota abundance (class Negativicutes id.2164)	TRUE
10	5579818	0.047817	0.0105282	6.06108e-06	14306	ebi-a-GCST90016922	rs9423647	G	A	NA	Gut microbiota abundance (class Negativicutes id.2164)	TRUE
15	101245088	-0.114178	0.02405	2.16631e-06	14306	ebi-a-GCST90016922	rs71405394	G	A	NA	Gut microbiota abundance (class Negativicutes id.2164)	TRUE
16	21249925	-0.0659623	0.0134137	1.1623e-06	14306	ebi-a-GCST90016922	rs60274479	T	C	NA	Gut microbiota abundance (class Negativicutes id.2164)	TRUE
21	34377485	0.0489057	0.0108842	8.43918e-06	14306	ebi-a-GCST90016922	rs2834062	A	G	NA	Gut microbiota abundance (class Negativicutes id.2164)	TRUE
1	20552072	-0.0580215	0.0127806	5.10352e-06	14306	ebi-a-GCST90017064	rs2105937	G	A	NA	Gut microbiota abundance (genus Ruminococcus gauvreauii group id.11342)	TRUE
1	161880482	0.0955324	0.0213436	5.03721e-06	14306	ebi-a-GCST90017064	rs12079579	A	G	NA	Gut microbiota abundance (genus Ruminococcus gauvreauii group id.11342)	TRUE
2	191954852	-0.0610096	0.0130484	3.38213e-06	14306	ebi-a-GCST90017064	rs10931481	A	G	NA	Gut microbiota abundance (genus Ruminococcus gauvreauii group id.11342)	TRUE
3	112372317	-0.0621643	0.0126072	8.49122e-07	14306	ebi-a-GCST90017064	rs9870933	G	A	NA	Gut microbiota abundance (genus Ruminococcus gauvreauii group id.11342)	TRUE
4	18824860	0.0736808	0.0169665	7.48032e-06	14306	ebi-a-GCST90017064	rs73802842	C	A	NA	Gut microbiota abundance (genus Ruminococcus gauvreauii group id.11342)	TRUE
5	112627773	0.0709419	0.0156855	7.27562e-06	14306	ebi-a-GCST90017064	rs13188803	T	A	NA	Gut microbiota abundance (genus Ruminococcus gauvreauii group id.11342)	TRUE
5	166419552	0.094737	0.0210157	5.53669e-06	14306	ebi-a-GCST90017064	rs431418	G	A	NA	Gut microbiota abundance (genus Ruminococcus gauvreauii group id.11342)	TRUE
7	153487396	0.110654	0.0240684	4.49376e-06	14306	ebi-a-GCST90017064	rs12539819	C	T	NA	Gut microbiota abundance (genus Ruminococcus gauvreauii group id.11342)	TRUE
8	137090850	-0.0566974	0.0123497	5.27716e-06	14306	ebi-a-GCST90017064	rs2166943	C	A	NA	Gut microbiota abundance (genus Ruminococcus gauvreauii group id.11342)	TRUE
10	29201860	-0.067603	0.0133738	2.46371e-07	14306	ebi-a-GCST90017064	rs2047242	A	G	NA	Gut microbiota abundance (genus Ruminococcus gauvreauii group id.11342)	TRUE
12	61119266	0.0590284	0.0124874	1.85964e-06	14306	ebi-a-GCST90017064	rs1391597	C	T	NA	Gut microbiota abundance (genus Ruminococcus gauvreauii group id.11342)	TRUE
15	85563483	0.0654926	0.0139101	2.27463e-06	14306	ebi-a-GCST90017064	rs289410	A	G	NA	Gut microbiota abundance (genus Ruminococcus gauvreauii group id.11342)	TRUE
16	2767894	0.121037	0.02386	2.90764e-07	14306	ebi-a-GCST90017064	rs71386687	T	G	NA	Gut microbiota abundance (genus Ruminococcus gauvreauii group id.11342)	TRUE
1	30400301	0.0580232	0.0122722	1.95916e-06	14306	ebi-a-GCST90016983	rs1010560	C	A	NA	Gut microbiota abundance (genus Coprococcus1 id.11301)	TRUE
1	95424321	-0.0718988	0.0144651	1.0329e-06	14306	ebi-a-GCST90016983	rs74101919	T	C	NA	Gut microbiota abundance (genus Coprococcus1 id.11301)	TRUE
2	22079770	0.0499197	0.0113558	8.95282e-06	14306	ebi-a-GCST90016983	rs1519491	T	C	NA	Gut microbiota abundance (genus Coprococcus1 id.11301)	TRUE
3	165693143	0.0573137	0.0127573	8.5686e-06	14306	ebi-a-GCST90016983	rs73167075	T	C	NA	Gut microbiota abundance (genus Coprococcus1 id.11301)	TRUE
4	174468316	-0.08963	0.0186508	1.57195e-06	14306	ebi-a-GCST90016983	rs56405618	A	G	NA	Gut microbiota abundance (genus Coprococcus1 id.11301)	TRUE
6	72529277	-0.0510343	0.0109535	3.32859e-06	14306	ebi-a-GCST90016983	rs1576241	A	G	NA	Gut microbiota abundance (genus Coprococcus1 id.11301)	TRUE
7	132556835	0.0518543	0.0113136	4.55229e-06	14306	ebi-a-GCST90016983	rs7784490	G	C	NA	Gut microbiota abundance (genus Coprococcus1 id.11301)	TRUE
10	15913820	-0.205899	0.0460018	8.61847e-06	14306	ebi-a-GCST90016983	rs946513	T	C	NA	Gut microbiota abundance (genus Coprococcus1 id.11301)	TRUE
11	124554061	0.0903299	0.0197212	4.9153e-06	14306	ebi-a-GCST90016983	rs12794898	G	T	NA	Gut microbiota abundance (genus Coprococcus1 id.11301)	TRUE
11	134622282	0.167591	0.0355224	1.97916e-06	14306	ebi-a-GCST90016983	rs73031725	T	C	NA	Gut microbiota abundance (genus Coprococcus1 id.11301)	TRUE
14	29898456	-0.0521782	0.0118051	8.00774e-06	14306	ebi-a-GCST90016983	rs12886051	G	C	NA	Gut microbiota abundance (genus Coprococcus1 id.11301)	TRUE
19	2600717	-0.0561173	0.0126824	7.65332e-06	14306	ebi-a-GCST90016983	rs2907920	G	A	NA	Gut microbiota abundance (genus Coprococcus1 id.11301)	TRUE
20	4319420	-0.0585649	0.0109914	1.1397e-07	14306	ebi-a-GCST90016983	rs4277593	G	A	NA	Gut microbiota abundance (genus Coprococcus1 id.11301)	TRUE
2	38049069	0.130568	0.0276239	2.76707e-06	1531	ebi-a-GCST90017089	rs11899949	G	A	NA	Gut microbiota abundance (genus Victivallis id.2256)	TRUE
3	57723877	0.117031	0.0249764	2.95822e-06	1531	ebi-a-GCST90017089	rs6445926	G	C	NA	Gut microbiota abundance (genus Victivallis id.2256)	TRUE
4	9608445	-0.178036	0.0374344	2.54132e-06	1531	ebi-a-GCST90017089	rs12512543	A	C	NA	Gut microbiota abundance (genus Victivallis id.2256)	TRUE
5	180579462	0.110803	0.0249655	9.93276e-06	1531	ebi-a-GCST90017089	rs2546432	C	T	NA	Gut microbiota abundance (genus Victivallis id.2256)	TRUE
6	131630319	0.116918	0.0247515	2.75201e-06	1531	ebi-a-GCST90017089	rs4895919	C	T	NA	Gut microbiota abundance (genus Victivallis id.2256)	TRUE
7	106378229	-0.152754	0.0351572	8.15943e-06	1531	ebi-a-GCST90017089	rs342302	A	G	NA	Gut microbiota abundance (genus Victivallis id.2256)	TRUE
9	136309841	-0.181449	0.0391678	2.60375e-06	1531	ebi-a-GCST90017089	rs592514	T	A	NA	Gut microbiota abundance (genus Victivallis id.2256)	TRUE
11	9312796	-0.158501	0.0315231	6.25749e-07	1531	ebi-a-GCST90017089	rs56349194	A	G	NA	Gut microbiota abundance (genus Victivallis id.2256)	TRUE
12	102514184	0.121561	0.0246058	8.22224e-07	1531	ebi-a-GCST90017089	rs4764863	G	A	NA	Gut microbiota abundance (genus Victivallis id.2256)	TRUE
13	72876881	-0.13381	0.0290127	7.65244e-06	1531	ebi-a-GCST90017089	rs173120	C	T	NA	Gut microbiota abundance (genus Victivallis id.2256)	TRUE
14	96071125	-0.118576	0.0263146	7.65244e-06	1531	ebi-a-GCST90017089	rs911666	T	C	NA	Gut microbiota abundance (genus Victivallis id.2256)	TRUE
21	40405606	-0.13827	0.031273	8.72831e-06	1531	ebi-a-GCST90017089	rs1882775	A	G	NA	Gut microbiota abundance (genus Victivallis id.2256)	TRUE
1	239995451	-0.117998	0.025516	4.79789e-06	14306	ebi-a-GCST90016938	rs488164	G	T	NA	Gut microbiota abundance (family Family XI id.1936)	TRUE
4	119955787	0.128253	0.0274718	3.38556e-06	14306	ebi-a-GCST90016938	rs3733511	A	G	NA	Gut microbiota abundance (family Family XI id.1936)	TRUE
7	148921732	-0.177599	0.0372795	2.70222e-06	14306	ebi-a-GCST90016938	rs11547158	A	G	NA	Gut microbiota abundance (family Family XI id.1936)	TRUE
9	115821485	-0.162115	0.032151	5.78309e-07	14306	ebi-a-GCST90016938	rs10759623	C	T	NA	Gut microbiota abundance (family Family XI id.1936)	TRUE
11	35334668	-0.116383	0.0252125	3.97109e-06	14306	ebi-a-GCST90016938	rs17379710	T	C	NA	Gut microbiota abundance (family Family XI id.1936)	TRUE
11	95357209	-0.150538	0.0302319	6.63437e-07	14306	ebi-a-GCST90016938	rs2155352	A	G	NA	Gut microbiota abundance (family Family XI id.1936)	TRUE
16	54115200	-0.117677	0.0251491	3.19374e-06	14306	ebi-a-GCST90016938	rs697771	A	G	NA	Gut microbiota abundance (family Family XI id.1936)	TRUE
16	64956642	0.224835	0.0511672	8.4126e-06	14306	ebi-a-GCST90016938	rs78222136	G	C	NA	Gut microbiota abundance (family Family XI id.1936)	TRUE
18	43345864	-0.112486	0.0251099	9.42671e-06	14306	ebi-a-GCST90016938	rs2156611	T	C	NA	Gut microbiota abundance (family Family XI id.1936)	TRUE
20	55348292	-0.118619	0.0261969	7.07082e-06	14306	ebi-a-GCST90016938	rs6025153	C	G	NA	Gut microbiota abundance (family Family XI id.1936)	TRUE
4	11907559	-0.0881922	0.0194146	6.05954e-06	14306	ebi-a-GCST90017034	rs6856150	A	G	NA	Gut microbiota abundance (genus Odoribacter id.952)	TRUE
8	1266824	-0.0577795	0.0125389	3.67443e-06	14306	ebi-a-GCST90017034	rs10093869	A	G	NA	Gut microbiota abundance (genus Odoribacter id.952)	TRUE
8	69677480	0.121449	0.0264106	9.48681e-06	14306	ebi-a-GCST90017034	rs74553962	T	G	NA	Gut microbiota abundance (genus Odoribacter id.952)	TRUE
11	6848360	0.0999781	0.0223785	8.85054e-06	14306	ebi-a-GCST90017034	rs16918425	A	T	NA	Gut microbiota abundance (genus Odoribacter id.952)	TRUE
12	67655943	-0.133489	0.0268526	6.56251e-07	14306	ebi-a-GCST90017034	rs77779484	G	A	NA	Gut microbiota abundance (genus Odoribacter id.952)	TRUE
14	70944224	-0.0726896	0.0161372	3.68036e-06	14306	ebi-a-GCST90017034	rs28417404	A	G	NA	Gut microbiota abundance (genus Odoribacter id.952)	TRUE
15	58063881	0.0618294	0.0118887	2.07625e-07	14306	ebi-a-GCST90017034	rs503751	C	G	NA	Gut microbiota abundance (genus Odoribacter id.952)	TRUE
17	46763962	-0.0576329	0.0129154	6.02698e-06	14306	ebi-a-GCST90017034	rs4793970	A	G	NA	Gut microbiota abundance (genus Odoribacter id.952)	TRUE
19	49523088	-0.0550695	0.0121164	6.5793e-06	14306	ebi-a-GCST90017034	rs10423795	T	C	NA	Gut microbiota abundance (genus Odoribacter id.952)	TRUE
2	175403951	-0.169667	0.0374238	3.57511e-06	14306	ebi-a-GCST90016994	rs75949021	T	C	NA	Gut microbiota abundance (genus Erysipelotrichaceae UCG003 id.11384)	TRUE
1	176792690	0.0569173	0.0118382	1.41932e-06	14306	ebi-a-GCST90017111	rs7546249	A	T	NA	Gut microbiota abundance (phylum Bacteroidetes id.905)	TRUE
1	157495438	-0.223193	0.0493382	7.13116e-06	14306	ebi-a-GCST90017111	rs72706335	T	C	NA	Gut microbiota abundance (phylum Bacteroidetes id.905)	TRUE
2	53831026	0.0510857	0.0106804	1.70836e-06	14306	ebi-a-GCST90017111	rs2032750	C	T	NA	Gut microbiota abundance (phylum Bacteroidetes id.905)	TRUE
3	89340254	-0.0664262	0.0133481	4.783e-07	14306	ebi-a-GCST90017111	rs73846128	A	G	NA	Gut microbiota abundance (phylum Bacteroidetes id.905)	TRUE
8	70916181	0.0657788	0.0149886	8.42326e-06	14306	ebi-a-GCST90017111	rs62531359	T	G	NA	Gut microbiota abundance (phylum Bacteroidetes id.905)	TRUE
9	116888284	0.0700929	0.0148756	2.60994e-06	14306	ebi-a-GCST90017111	rs13291169	C	G	NA	Gut microbiota abundance (phylum Bacteroidetes id.905)	TRUE
9	136493820	0.145424	0.0311079	2.95951e-06	14306	ebi-a-GCST90017111	rs62575403	C	T	NA	Gut microbiota abundance (phylum Bacteroidetes id.905)	TRUE
13	70522683	-0.123117	0.0236743	2.53893e-07	14306	ebi-a-GCST90017111	rs73512608	G	A	NA	Gut microbiota abundance (phylum Bacteroidetes id.905)	TRUE
13	24963729	0.0543635	0.0124067	9.46651e-06	14306	ebi-a-GCST90017111	rs7999780	G	A	NA	Gut microbiota abundance (phylum Bacteroidetes id.905)	TRUE
14	59317502	0.104177	0.0213837	6.47187e-07	14306	ebi-a-GCST90017111	rs111845179	T	C	NA	Gut microbiota abundance (phylum Bacteroidetes id.905)	TRUE
16	74290641	0.0540001	0.0121526	6.51118e-06	14306	ebi-a-GCST90017111	rs929878	T	C	NA	Gut microbiota abundance (phylum Bacteroidetes id.905)	TRUE
17	6461200	-0.207163	0.0442629	1.20412e-06	14306	ebi-a-GCST90017111	rs73975615	G	A	NA	Gut microbiota abundance (phylum Bacteroidetes id.905)	TRUE
21	43942135	0.0477792	0.0105437	7.36885e-06	14306	ebi-a-GCST90017111	rs6586324	T	C	NA	Gut microbiota abundance (phylum Bacteroidetes id.905)	TRUE
22	27433885	-0.0556041	0.0120272	7.2247e-06	14306	ebi-a-GCST90017111	rs17343978	A	C	NA	Gut microbiota abundance (phylum Bacteroidetes id.905)	TRUE
1	41878680	-0.0520975	0.0115111	6.20869e-06	14306	ebi-a-GCST90017049	rs2801960	G	C	NA	Gut microbiota abundance (genus Ruminiclostridium5 id.11355)	TRUE
2	103755970	0.181548	0.0414078	8.82226e-06	14306	ebi-a-GCST90017049	rs73002572	G	C	NA	Gut microbiota abundance (genus Ruminiclostridium5 id.11355)	TRUE
3	55243531	-0.0713749	0.0165826	9.9552e-06	14306	ebi-a-GCST90017049	rs4955951	A	G	NA	Gut microbiota abundance (genus Ruminiclostridium5 id.11355)	TRUE
5	32477664	0.0820689	0.0174463	3.98896e-06	14306	ebi-a-GCST90017049	rs113753996	T	C	NA	Gut microbiota abundance (genus Ruminiclostridium5 id.11355)	TRUE
6	50405920	-0.0830505	0.0180073	3.52574e-06	14306	ebi-a-GCST90017049	rs1492620	T	C	NA	Gut microbiota abundance (genus Ruminiclostridium5 id.11355)	TRUE
8	131316030	0.051717	0.0113369	5.53962e-06	14306	ebi-a-GCST90017049	rs2791343	T	C	NA	Gut microbiota abundance (genus Ruminiclostridium5 id.11355)	TRUE
10	35262588	-0.0547387	0.0115163	2.1918e-06	14306	ebi-a-GCST90017049	rs10827477	A	G	NA	Gut microbiota abundance (genus Ruminiclostridium5 id.11355)	TRUE
10	12835085	0.0518991	0.0108777	1.70314e-06	14306	ebi-a-GCST90017049	rs2482038	C	A	NA	Gut microbiota abundance (genus Ruminiclostridium5 id.11355)	TRUE
12	1891043	0.0518814	0.0107482	1.43857e-06	14306	ebi-a-GCST90017049	rs2286384	C	G	NA	Gut microbiota abundance (genus Ruminiclostridium5 id.11355)	TRUE
13	108775162	-0.0484169	0.0108254	8.16188e-06	14306	ebi-a-GCST90017049	rs1223978	C	T	NA	Gut microbiota abundance (genus Ruminiclostridium5 id.11355)	TRUE
16	86769909	0.0740543	0.0159151	5.89807e-06	14306	ebi-a-GCST90017049	rs8053158	G	A	NA	Gut microbiota abundance (genus Ruminiclostridium5 id.11355)	TRUE
20	60293505	0.0932955	0.0199206	2.64107e-06	14306	ebi-a-GCST90017049	rs6121460	G	A	NA	Gut microbiota abundance (genus Ruminiclostridium5 id.11355)	TRUE
20	41177956	-0.0950311	0.0193507	1.14623e-06	14306	ebi-a-GCST90017049	rs79968837	A	G	NA	Gut microbiota abundance (genus Ruminiclostridium5 id.11355)	TRUE
21	19151940	-0.0585939	0.0121017	1.32681e-06	14306	ebi-a-GCST90017049	rs243585	C	G	NA	Gut microbiota abundance (genus Ruminiclostridium5 id.11355)	TRUE
21	33811886	0.0489617	0.0108702	6.81648e-06	14306	ebi-a-GCST90017049	rs2833828	G	A	NA	Gut microbiota abundance (genus Ruminiclostridium5 id.11355)	TRUE
1	206216607	-0.09152	0.0210002	7.93414e-06	14306	ebi-a-GCST90016969	rs28479800	A	T	NA	Gut microbiota abundance (genus Barnesiella id.944)	TRUE
2	180020849	0.098992	0.0214121	7.31122e-06	14306	ebi-a-GCST90016969	rs113258194	A	G	NA	Gut microbiota abundance (genus Barnesiella id.944)	TRUE
3	44327429	0.0690763	0.0149374	4.2416e-06	14306	ebi-a-GCST90016969	rs62251337	G	A	NA	Gut microbiota abundance (genus Barnesiella id.944)	TRUE
3	181589155	0.0917125	0.0190133	2.94761e-06	14306	ebi-a-GCST90016969	rs35177866	A	G	NA	Gut microbiota abundance (genus Barnesiella id.944)	TRUE
4	114546595	-0.0818645	0.0176441	4.23302e-06	14306	ebi-a-GCST90016969	rs79795328	A	G	NA	Gut microbiota abundance (genus Barnesiella id.944)	TRUE
4	102616869	-0.114369	0.0253873	6.76176e-06	14306	ebi-a-GCST90016969	rs72684847	T	C	NA	Gut microbiota abundance (genus Barnesiella id.944)	TRUE
4	5730954	-0.0697176	0.0139537	4.65029e-07	14306	ebi-a-GCST90016969	rs2276875	A	G	NA	Gut microbiota abundance (genus Barnesiella id.944)	TRUE
5	54107036	-0.0891491	0.0195601	3.16352e-06	14306	ebi-a-GCST90016969	rs77455852	T	G	NA	Gut microbiota abundance (genus Barnesiella id.944)	TRUE
6	148601905	0.0956023	0.0212961	8.91908e-06	14306	ebi-a-GCST90016969	rs11155559	T	C	NA	Gut microbiota abundance (genus Barnesiella id.944)	TRUE
6	23435415	0.0559495	0.0119716	3.00296e-06	14306	ebi-a-GCST90016969	rs199035	G	A	NA	Gut microbiota abundance (genus Barnesiella id.944)	TRUE
6	110831148	-0.165859	0.0337309	8.50883e-07	14306	ebi-a-GCST90016969	rs2428166	G	A	NA	Gut microbiota abundance (genus Barnesiella id.944)	TRUE
7	10076378	-0.0915241	0.0194623	3.82631e-06	14306	ebi-a-GCST90016969	rs2057922	C	G	NA	Gut microbiota abundance (genus Barnesiella id.944)	TRUE
7	122021518	0.0583747	0.0123176	2.29018e-06	14306	ebi-a-GCST90016969	rs13242616	C	T	NA	Gut microbiota abundance (genus Barnesiella id.944)	TRUE
8	105458416	-0.0778559	0.017164	6.77657e-06	14306	ebi-a-GCST90016969	rs76181748	C	T	NA	Gut microbiota abundance (genus Barnesiella id.944)	TRUE
8	25834694	-0.0791324	0.0174957	6.47635e-06	14306	ebi-a-GCST90016969	rs28418786	C	G	NA	Gut microbiota abundance (genus Barnesiella id.944)	TRUE
12	54872438	-0.121478	0.025184	1.19064e-06	14306	ebi-a-GCST90016969	rs60316894	C	T	NA	Gut microbiota abundance (genus Barnesiella id.944)	TRUE
15	87145913	-0.0550716	0.0120039	4.94527e-06	14306	ebi-a-GCST90016969	rs12909713	C	T	NA	Gut microbiota abundance (genus Barnesiella id.944)	TRUE
1	64139196	-0.0475363	0.0106939	9.52708e-06	14306	ebi-a-GCST90016916	rs1884466	C	T	NA	Gut microbiota abundance (class Erysipelotrichia id.2147)	TRUE
1	97457427	-0.0497374	0.0111376	8.02897e-06	14306	ebi-a-GCST90016916	rs290833	T	G	NA	Gut microbiota abundance (class Erysipelotrichia id.2147)	TRUE
3	195793712	-0.0524152	0.0106784	8.95468e-07	14306	ebi-a-GCST90016916	rs2300774	A	G	NA	Gut microbiota abundance (class Erysipelotrichia id.2147)	TRUE
5	3002546	-0.0492438	0.010887	6.14582e-06	14306	ebi-a-GCST90016916	rs1074800	G	A	NA	Gut microbiota abundance (class Erysipelotrichia id.2147)	TRUE
8	38803551	0.0681159	0.0127883	1.12264e-07	14306	ebi-a-GCST90016916	rs62504403	C	T	NA	Gut microbiota abundance (class Erysipelotrichia id.2147)	TRUE
8	2954952	0.0839071	0.0199131	9.28453e-06	14306	ebi-a-GCST90016916	rs7826267	G	T	NA	Gut microbiota abundance (class Erysipelotrichia id.2147)	TRUE
10	133897233	-0.0552212	0.0116074	2.33115e-06	14306	ebi-a-GCST90016916	rs10781552	C	T	NA	Gut microbiota abundance (class Erysipelotrichia id.2147)	TRUE
13	40385457	0.10305	0.0224648	2.79126e-06	14306	ebi-a-GCST90016916	rs17530232	A	G	NA	Gut microbiota abundance (class Erysipelotrichia id.2147)	TRUE
14	48997206	0.0608929	0.0133764	4.23107e-06	14306	ebi-a-GCST90016916	rs4078432	T	C	NA	Gut microbiota abundance (class Erysipelotrichia id.2147)	TRUE
14	56156504	0.0538798	0.0116888	4.08479e-06	14306	ebi-a-GCST90016916	rs8003149	C	T	NA	Gut microbiota abundance (class Erysipelotrichia id.2147)	TRUE
14	80357610	0.0724145	0.0164471	5.40344e-06	14306	ebi-a-GCST90016916	rs56970041	T	G	NA	Gut microbiota abundance (class Erysipelotrichia id.2147)	TRUE
17	70327224	-0.0806041	0.0167641	1.8451e-06	14306	ebi-a-GCST90016916	rs35161940	T	C	NA	Gut microbiota abundance (class Erysipelotrichia id.2147)	TRUE
18	5830507	-0.0945759	0.0194091	9.12347e-07	14306	ebi-a-GCST90016916	rs7234058	T	C	NA	Gut microbiota abundance (class Erysipelotrichia id.2147)	TRUE
1	45082825	-0.0694173	0.0150795	5.38158e-06	14306	ebi-a-GCST90016974	rs270727	G	C	NA	Gut microbiota abundance (genus Butyricimonas id.945)	TRUE
2	83093264	-0.133188	0.0289905	4.80408e-06	14306	ebi-a-GCST90016974	rs71428626	G	T	NA	Gut microbiota abundance (genus Butyricimonas id.945)	TRUE
3	78740009	-0.14948	0.0327073	4.05807e-06	14306	ebi-a-GCST90016974	rs78453362	A	G	NA	Gut microbiota abundance (genus Butyricimonas id.945)	TRUE
3	127468661	-0.0653488	0.0137974	2.23398e-06	14306	ebi-a-GCST90016974	rs782080	A	T	NA	Gut microbiota abundance (genus Butyricimonas id.945)	TRUE
5	997217	0.0759694	0.0167617	8.18653e-06	14306	ebi-a-GCST90016974	rs326049	C	G	NA	Gut microbiota abundance (genus Butyricimonas id.945)	TRUE
5	62119947	0.0713357	0.0145396	8.58084e-07	14306	ebi-a-GCST90016974	rs2642760	G	C	NA	Gut microbiota abundance (genus Butyricimonas id.945)	TRUE
5	159867647	-0.0872983	0.0174893	7.41908e-07	14306	ebi-a-GCST90016974	rs62390301	T	C	NA	Gut microbiota abundance (genus Butyricimonas id.945)	TRUE
8	4834406	0.0680719	0.0148172	4.5036e-06	14306	ebi-a-GCST90016974	rs9657374	C	T	NA	Gut microbiota abundance (genus Butyricimonas id.945)	TRUE
10	72711156	0.0703539	0.0144439	8.85462e-07	14306	ebi-a-GCST90016974	rs7083431	A	C	NA	Gut microbiota abundance (genus Butyricimonas id.945)	TRUE
10	72443070	0.0664154	0.0149766	8.24594e-06	14306	ebi-a-GCST90016974	rs72814525	A	G	NA	Gut microbiota abundance (genus Butyricimonas id.945)	TRUE
11	56664962	0.135265	0.0298411	6.55164e-06	14306	ebi-a-GCST90016974	rs11228830	A	G	NA	Gut microbiota abundance (genus Butyricimonas id.945)	TRUE
12	129438771	-0.0862781	0.0196846	6.7007e-06	14306	ebi-a-GCST90016974	rs12304031	G	A	NA	Gut microbiota abundance (genus Butyricimonas id.945)	TRUE
15	80528373	0.062721	0.0138998	6.87717e-06	14306	ebi-a-GCST90016974	rs2114713	G	T	NA	Gut microbiota abundance (genus Butyricimonas id.945)	TRUE
16	22172866	0.113124	0.0248176	4.76255e-06	14306	ebi-a-GCST90016974	rs1862649	G	A	NA	Gut microbiota abundance (genus Butyricimonas id.945)	TRUE
18	34091618	0.122037	0.0269587	6.36649e-06	14306	ebi-a-GCST90016974	rs12458763	A	C	NA	Gut microbiota abundance (genus Butyricimonas id.945)	TRUE
19	49162501	0.0732608	0.0158324	3.89807e-06	14306	ebi-a-GCST90016974	rs62130338	A	G	NA	Gut microbiota abundance (genus Butyricimonas id.945)	TRUE
21	16550389	-0.144881	0.0274574	1.73696e-07	14306	ebi-a-GCST90016974	rs113054641	G	A	NA	Gut microbiota abundance (genus Butyricimonas id.945)	TRUE
2	125440268	0.112811	0.0239106	3.08546e-06	14306	ebi-a-GCST90017033	rs10202904	G	T	NA	Gut microbiota abundance (genus Methanobrevibacter id.123)	TRUE
3	15053083	-0.188956	0.0419905	8.04896e-06	14306	ebi-a-GCST90017033	rs6776814	T	C	NA	Gut microbiota abundance (genus Methanobrevibacter id.123)	TRUE
4	104418307	0.214213	0.0456045	3.81566e-06	14306	ebi-a-GCST90017033	rs894996	C	A	NA	Gut microbiota abundance (genus Methanobrevibacter id.123)	TRUE
10	112266046	0.115197	0.0255492	7.61377e-06	14306	ebi-a-GCST90017033	rs1334944	T	C	NA	Gut microbiota abundance (genus Methanobrevibacter id.123)	TRUE
11	89349287	0.113013	0.0254343	7.03105e-06	14306	ebi-a-GCST90017033	rs11018665	A	T	NA	Gut microbiota abundance (genus Methanobrevibacter id.123)	TRUE
13	41963791	0.222849	0.0454319	1.07552e-06	14306	ebi-a-GCST90017033	rs76029318	T	C	NA	Gut microbiota abundance (genus Methanobrevibacter id.123)	TRUE
15	31516919	-0.109639	0.0247979	9.28282e-06	14306	ebi-a-GCST90017033	rs4779844	C	G	NA	Gut microbiota abundance (genus Methanobrevibacter id.123)	TRUE
19	52925820	0.135628	0.0308139	9.73823e-06	14306	ebi-a-GCST90017033	rs4802933	G	A	NA	Gut microbiota abundance (genus Methanobrevibacter id.123)	TRUE
1	9361576	0.0661211	0.0144736	4.72585e-06	14306	ebi-a-GCST90017060	rs11581881	C	T	NA	Gut microbiota abundance (genus Ruminococcaceae UCG013 id.11370)	TRUE
3	197049996	-0.0607903	0.0130847	4.19382e-06	14306	ebi-a-GCST90017060	rs12485353	G	A	NA	Gut microbiota abundance (genus Ruminococcaceae UCG013 id.11370)	TRUE
3	9534657	0.194976	0.0418213	3.34981e-06	14306	ebi-a-GCST90017060	rs76973485	G	T	NA	Gut microbiota abundance (genus Ruminococcaceae UCG013 id.11370)	TRUE
5	3628882	0.105087	0.023446	9.54707e-06	14306	ebi-a-GCST90017060	rs9313055	T	C	NA	Gut microbiota abundance (genus Ruminococcaceae UCG013 id.11370)	TRUE
5	141395140	0.0684961	0.014558	1.67954e-06	14306	ebi-a-GCST90017060	rs12189346	G	A	NA	Gut microbiota abundance (genus Ruminococcaceae UCG013 id.11370)	TRUE
7	32530997	0.0498329	0.0112066	8.16263e-06	14306	ebi-a-GCST90017060	rs7784330	A	G	NA	Gut microbiota abundance (genus Ruminococcaceae UCG013 id.11370)	TRUE
8	40311885	-0.0488692	0.0109907	8.43782e-06	14306	ebi-a-GCST90017060	rs2730183	G	A	NA	Gut microbiota abundance (genus Ruminococcaceae UCG013 id.11370)	TRUE
9	136620584	-0.0490863	0.0109903	8.37606e-06	14306	ebi-a-GCST90017060	rs2428106	C	G	NA	Gut microbiota abundance (genus Ruminococcaceae UCG013 id.11370)	TRUE
9	13609119	-0.0856047	0.0189311	8.603e-06	14306	ebi-a-GCST90017060	rs12336782	T	C	NA	Gut microbiota abundance (genus Ruminococcaceae UCG013 id.11370)	TRUE
10	19780463	0.111491	0.0240157	4.15499e-06	14306	ebi-a-GCST90017060	rs16918863	A	C	NA	Gut microbiota abundance (genus Ruminococcaceae UCG013 id.11370)	TRUE
10	2219930	-0.0656129	0.0117477	2.553e-08	14306	ebi-a-GCST90017060	rs12781711	C	T	NA	Gut microbiota abundance (genus Ruminococcaceae UCG013 id.11370)	TRUE
10	115650278	-0.0598404	0.0131807	6.46205e-06	14306	ebi-a-GCST90017060	rs4385846	T	G	NA	Gut microbiota abundance (genus Ruminococcaceae UCG013 id.11370)	TRUE
12	30245557	-0.0942968	0.0200712	2.55399e-06	14306	ebi-a-GCST90017060	rs75088940	T	C	NA	Gut microbiota abundance (genus Ruminococcaceae UCG013 id.11370)	TRUE
13	76583319	-0.0524592	0.0117701	8.72529e-06	14306	ebi-a-GCST90017060	rs9565219	T	A	NA	Gut microbiota abundance (genus Ruminococcaceae UCG013 id.11370)	TRUE
16	10863459	0.0533411	0.0120757	9.63585e-06	14306	ebi-a-GCST90017060	rs1729063	C	G	NA	Gut microbiota abundance (genus Ruminococcaceae UCG013 id.11370)	TRUE
1	192019835	-0.0899559	0.0177107	6.88763e-07	14306	ebi-a-GCST90017008	rs72730932	C	A	NA	Gut microbiota abundance (genus Family XIII AD3011 group id.11293)	TRUE
1	240694163	0.0608052	0.0122149	6.75118e-07	14306	ebi-a-GCST90017008	rs16840310	G	A	NA	Gut microbiota abundance (genus Family XIII AD3011 group id.11293)	TRUE
2	74195551	-0.0904399	0.0196301	5.91248e-06	14306	ebi-a-GCST90017008	rs11126423	T	C	NA	Gut microbiota abundance (genus Family XIII AD3011 group id.11293)	TRUE
3	29811865	0.10752	0.0240482	8.70803e-06	14306	ebi-a-GCST90017008	rs9837139	A	G	NA	Gut microbiota abundance (genus Family XIII AD3011 group id.11293)	TRUE
3	3556826	-0.0657834	0.0129056	3.87543e-07	14306	ebi-a-GCST90017008	rs9852893	G	C	NA	Gut microbiota abundance (genus Family XIII AD3011 group id.11293)	TRUE
4	38917830	-0.0759493	0.0172101	9.02049e-06	14306	ebi-a-GCST90017008	rs11736617	G	A	NA	Gut microbiota abundance (genus Family XIII AD3011 group id.11293)	TRUE
5	14159925	-0.0645635	0.0143225	7.48187e-06	14306	ebi-a-GCST90017008	rs149302	T	C	NA	Gut microbiota abundance (genus Family XIII AD3011 group id.11293)	TRUE
6	32695336	-0.0811384	0.0185669	8.92771e-06	14306	ebi-a-GCST90017008	rs9276029	A	G	NA	Gut microbiota abundance (genus Family XIII AD3011 group id.11293)	TRUE
7	28603985	-0.112891	0.0245292	4.1917e-06	14306	ebi-a-GCST90017008	rs17156849	G	A	NA	Gut microbiota abundance (genus Family XIII AD3011 group id.11293)	TRUE
9	136678954	0.0649589	0.0147534	7.87807e-06	14306	ebi-a-GCST90017008	rs739451	C	T	NA	Gut microbiota abundance (genus Family XIII AD3011 group id.11293)	TRUE
12	18127597	-0.096065	0.020828	2.55806e-06	14306	ebi-a-GCST90017008	rs12812672	T	C	NA	Gut microbiota abundance (genus Family XIII AD3011 group id.11293)	TRUE
15	40047706	-0.0811976	0.0183335	6.90828e-06	14306	ebi-a-GCST90017008	rs12911842	A	T	NA	Gut microbiota abundance (genus Family XIII AD3011 group id.11293)	TRUE
15	58683697	0.0732552	0.0159898	3.90841e-06	14306	ebi-a-GCST90017008	rs16940167	C	T	NA	Gut microbiota abundance (genus Family XIII AD3011 group id.11293)	TRUE
16	16006242	0.128753	0.0276002	3.89081e-06	14306	ebi-a-GCST90017008	rs62029761	A	G	NA	Gut microbiota abundance (genus Family XIII AD3011 group id.11293)	TRUE
20	4618639	-0.0800851	0.0163834	5.80216e-07	14306	ebi-a-GCST90017008	rs62200412	C	T	NA	Gut microbiota abundance (genus Family XIII AD3011 group id.11293)	TRUE
3	142135117	0.0625312	0.0131735	1.95488e-06	14306	ebi-a-GCST90017107	rs13086907	G	A	NA	Gut microbiota abundance (order Selenomonadales id.2165)	TRUE
4	17413426	-0.151829	0.0314932	1.87452e-06	14306	ebi-a-GCST90017107	rs73232831	G	A	NA	Gut microbiota abundance (order Selenomonadales id.2165)	TRUE
5	165266628	-0.0565284	0.0112298	4.14601e-07	14306	ebi-a-GCST90017107	rs1643968	T	C	NA	Gut microbiota abundance (order Selenomonadales id.2165)	TRUE
7	22817571	0.0501306	0.0105798	2.00111e-06	14306	ebi-a-GCST90017107	rs4722181	T	G	NA	Gut microbiota abundance (order Selenomonadales id.2165)	TRUE
7	75609677	0.0529785	0.0119177	9.26296e-06	14306	ebi-a-GCST90017107	rs1135612	G	A	NA	Gut microbiota abundance (order Selenomonadales id.2165)	TRUE
8	41231597	0.0502053	0.0108382	2.93326e-06	14306	ebi-a-GCST90017107	rs1447205	C	G	NA	Gut microbiota abundance (order Selenomonadales id.2165)	TRUE
9	124912908	0.0777075	0.0168628	2.95474e-06	14306	ebi-a-GCST90017107	rs61249479	A	C	NA	Gut microbiota abundance (order Selenomonadales id.2165)	TRUE
10	115597993	0.0543966	0.0129365	7.80657e-06	14306	ebi-a-GCST90017107	rs4463806	C	T	NA	Gut microbiota abundance (order Selenomonadales id.2165)	TRUE
10	80086072	0.0748989	0.0166458	7.58124e-06	14306	ebi-a-GCST90017107	rs1649999	A	G	NA	Gut microbiota abundance (order Selenomonadales id.2165)	TRUE
10	5579818	0.047817	0.0105282	6.06108e-06	14306	ebi-a-GCST90017107	rs9423647	G	A	NA	Gut microbiota abundance (order Selenomonadales id.2165)	TRUE
15	101245088	-0.114178	0.02405	2.16631e-06	14306	ebi-a-GCST90017107	rs71405394	G	A	NA	Gut microbiota abundance (order Selenomonadales id.2165)	TRUE
16	21249925	-0.0659623	0.0134137	1.1623e-06	14306	ebi-a-GCST90017107	rs60274479	T	C	NA	Gut microbiota abundance (order Selenomonadales id.2165)	TRUE
21	34377485	0.0489057	0.0108842	8.43918e-06	14306	ebi-a-GCST90017107	rs2834062	A	G	NA	Gut microbiota abundance (order Selenomonadales id.2165)	TRUE
1	176571431	-0.0603429	0.0126849	1.51604e-06	14306	ebi-a-GCST90016933	rs240104	T	C	NA	Gut microbiota abundance (family Coriobacteriaceae id.811)	TRUE
3	11654412	0.116408	0.0258545	9.02693e-06	14306	ebi-a-GCST90016933	rs2442778	A	G	NA	Gut microbiota abundance (family Coriobacteriaceae id.811)	TRUE
5	90471451	0.0498855	0.0112446	9.77372e-06	14306	ebi-a-GCST90016933	rs1397793	A	G	NA	Gut microbiota abundance (family Coriobacteriaceae id.811)	TRUE
5	459415	0.25584	0.0561995	4.65693e-06	14306	ebi-a-GCST90016933	rs80046645	C	G	NA	Gut microbiota abundance (family Coriobacteriaceae id.811)	TRUE
5	125460084	0.0774888	0.0171877	5.63093e-06	14306	ebi-a-GCST90016933	rs76779974	C	G	NA	Gut microbiota abundance (family Coriobacteriaceae id.811)	TRUE
7	105084680	-0.0565686	0.0126265	7.79938e-06	14306	ebi-a-GCST90016933	rs13307134	T	C	NA	Gut microbiota abundance (family Coriobacteriaceae id.811)	TRUE
7	24464799	-0.0486059	0.0108982	7.87281e-06	14306	ebi-a-GCST90016933	rs62448869	T	A	NA	Gut microbiota abundance (family Coriobacteriaceae id.811)	TRUE
9	136512906	0.0926543	0.0209468	8.26913e-06	14306	ebi-a-GCST90016933	rs3025411	A	G	NA	Gut microbiota abundance (family Coriobacteriaceae id.811)	TRUE
10	1922731	0.06075	0.0130939	4.82848e-06	14306	ebi-a-GCST90016933	rs11250875	T	C	NA	Gut microbiota abundance (family Coriobacteriaceae id.811)	TRUE
10	65799217	0.0778402	0.0155815	5.43313e-07	14306	ebi-a-GCST90016933	rs719099	A	G	NA	Gut microbiota abundance (family Coriobacteriaceae id.811)	TRUE
12	11494021	0.0586265	0.0129006	4.84117e-06	14306	ebi-a-GCST90016933	rs1816223	G	A	NA	Gut microbiota abundance (family Coriobacteriaceae id.811)	TRUE
14	39660509	0.103377	0.0229286	6.8962e-06	14306	ebi-a-GCST90016933	rs8010111	A	G	NA	Gut microbiota abundance (family Coriobacteriaceae id.811)	TRUE
15	86433579	-0.0510212	0.0114339	8.14442e-06	14306	ebi-a-GCST90016933	rs11073596	G	T	NA	Gut microbiota abundance (family Coriobacteriaceae id.811)	TRUE
17	37376685	0.0965017	0.0207666	3.88356e-06	14306	ebi-a-GCST90016933	rs34739816	G	T	NA	Gut microbiota abundance (family Coriobacteriaceae id.811)	TRUE
17	8121332	0.0773006	0.017553	8.0201e-06	14306	ebi-a-GCST90016933	rs11656361	A	C	NA	Gut microbiota abundance (family Coriobacteriaceae id.811)	TRUE
19	52895166	0.0789796	0.0177205	8.51236e-06	14306	ebi-a-GCST90016933	rs12974142	G	A	NA	Gut microbiota abundance (family Coriobacteriaceae id.811)	TRUE
20	62072077	-0.0714367	0.0154113	5.39126e-06	14306	ebi-a-GCST90016933	rs67561917	A	G	NA	Gut microbiota abundance (family Coriobacteriaceae id.811)	TRUE
1	147291928	0.0749762	0.0164404	3.35792e-06	14306	ebi-a-GCST90017005	rs78250280	G	A	NA	Gut microbiota abundance (genus Eubacterium ventriosum group id.11341)	TRUE
1	109398264	0.0751501	0.0164978	6.11139e-06	14306	ebi-a-GCST90017005	rs66746423	C	T	NA	Gut microbiota abundance (genus Eubacterium ventriosum group id.11341)	TRUE
2	203661779	-0.0739179	0.0166705	6.62232e-06	14306	ebi-a-GCST90017005	rs6704822	G	A	NA	Gut microbiota abundance (genus Eubacterium ventriosum group id.11341)	TRUE
3	107736434	-0.0715522	0.016137	9.55983e-06	14306	ebi-a-GCST90017005	rs13082419	C	T	NA	Gut microbiota abundance (genus Eubacterium ventriosum group id.11341)	TRUE
3	171895485	0.0528752	0.0117972	6.8691e-06	14306	ebi-a-GCST90017005	rs66830358	T	A	NA	Gut microbiota abundance (genus Eubacterium ventriosum group id.11341)	TRUE
3	190223732	0.0783394	0.0160257	7.9704e-07	14306	ebi-a-GCST90017005	rs57199565	T	C	NA	Gut microbiota abundance (genus Eubacterium ventriosum group id.11341)	TRUE
4	126371814	0.0975711	0.0224388	5.20907e-06	14306	ebi-a-GCST90017005	rs73849225	T	C	NA	Gut microbiota abundance (genus Eubacterium ventriosum group id.11341)	TRUE
8	114445055	-0.0906428	0.0191909	1.73968e-06	14306	ebi-a-GCST90017005	rs16884680	G	T	NA	Gut microbiota abundance (genus Eubacterium ventriosum group id.11341)	TRUE
12	52423996	0.0618696	0.0132532	2.88908e-06	14306	ebi-a-GCST90017005	rs876734	T	C	NA	Gut microbiota abundance (genus Eubacterium ventriosum group id.11341)	TRUE
13	51938576	-0.0817111	0.0183121	7.8352e-06	14306	ebi-a-GCST90017005	rs9316536	T	G	NA	Gut microbiota abundance (genus Eubacterium ventriosum group id.11341)	TRUE
13	98785900	-0.143349	0.0286241	7.21755e-07	14306	ebi-a-GCST90017005	rs11617697	A	G	NA	Gut microbiota abundance (genus Eubacterium ventriosum group id.11341)	TRUE
14	44975510	-0.0548171	0.0118426	3.5532e-06	14306	ebi-a-GCST90017005	rs3809430	T	C	NA	Gut microbiota abundance (genus Eubacterium ventriosum group id.11341)	TRUE
14	51960625	-0.0627263	0.013786	5.75798e-06	14306	ebi-a-GCST90017005	rs35179274	C	T	NA	Gut microbiota abundance (genus Eubacterium ventriosum group id.11341)	TRUE
16	60348381	0.0658926	0.0143747	6.54757e-06	14306	ebi-a-GCST90017005	rs72783037	C	A	NA	Gut microbiota abundance (genus Eubacterium ventriosum group id.11341)	TRUE
18	22460785	0.0587198	0.0123453	2.07501e-06	14306	ebi-a-GCST90017005	rs12964517	G	A	NA	Gut microbiota abundance (genus Eubacterium ventriosum group id.11341)	TRUE
20	50140919	-0.0956303	0.0193428	9.53608e-07	14306	ebi-a-GCST90017005	rs73615400	T	C	NA	Gut microbiota abundance (genus Eubacterium ventriosum group id.11341)	TRUE
20	2308307	-0.0603594	0.011658	2.50323e-07	14306	ebi-a-GCST90017005	rs6048195	A	T	NA	Gut microbiota abundance (genus Eubacterium ventriosum group id.11341)	TRUE
1	237422989	0.082486	0.0187194	9.96323e-06	14306	ebi-a-GCST90017061	rs10495392	T	C	NA	Gut microbiota abundance (genus Ruminococcaceae UCG014 id.11371)	TRUE
1	15322582	-0.115767	0.0254199	8.70502e-06	14306	ebi-a-GCST90017061	rs74060145	C	G	NA	Gut microbiota abundance (genus Ruminococcaceae UCG014 id.11371)	TRUE
2	119467367	0.0577127	0.0126675	7.0419e-06	14306	ebi-a-GCST90017061	rs439810	C	G	NA	Gut microbiota abundance (genus Ruminococcaceae UCG014 id.11371)	TRUE
2	57205854	0.0671775	0.0139838	2.4119e-06	14306	ebi-a-GCST90017061	rs72809222	T	C	NA	Gut microbiota abundance (genus Ruminococcaceae UCG014 id.11371)	TRUE
2	134854659	0.060048	0.0126417	1.90222e-06	14306	ebi-a-GCST90017061	rs995642	C	T	NA	Gut microbiota abundance (genus Ruminococcaceae UCG014 id.11371)	TRUE
3	101334609	0.0582548	0.0119657	1.21143e-06	14306	ebi-a-GCST90017061	rs12638134	T	G	NA	Gut microbiota abundance (genus Ruminococcaceae UCG014 id.11371)	TRUE
3	123829361	-0.0993852	0.0216819	6.71754e-06	14306	ebi-a-GCST90017061	rs73186226	G	A	NA	Gut microbiota abundance (genus Ruminococcaceae UCG014 id.11371)	TRUE
5	36435597	-0.122057	0.0260017	2.39701e-06	14306	ebi-a-GCST90017061	rs10941294	C	T	NA	Gut microbiota abundance (genus Ruminococcaceae UCG014 id.11371)	TRUE
5	26110626	-0.18835	0.0386643	4.62328e-07	14306	ebi-a-GCST90017061	rs115777838	T	C	NA	Gut microbiota abundance (genus Ruminococcaceae UCG014 id.11371)	TRUE
7	109564034	-0.058129	0.012903	6.04422e-06	14306	ebi-a-GCST90017061	rs62478832	T	A	NA	Gut microbiota abundance (genus Ruminococcaceae UCG014 id.11371)	TRUE
8	3636548	-0.0688023	0.0156083	9.80438e-06	14306	ebi-a-GCST90017061	rs34402072	C	T	NA	Gut microbiota abundance (genus Ruminococcaceae UCG014 id.11371)	TRUE
9	14363769	0.139276	0.0299132	2.9128e-06	14306	ebi-a-GCST90017061	rs56105232	G	A	NA	Gut microbiota abundance (genus Ruminococcaceae UCG014 id.11371)	TRUE
10	119928413	-0.0528257	0.0119367	9.75461e-06	14306	ebi-a-GCST90017061	rs853612	A	G	NA	Gut microbiota abundance (genus Ruminococcaceae UCG014 id.11371)	TRUE
11	126024042	0.0607865	0.0138761	9.91791e-06	14306	ebi-a-GCST90017061	rs61898819	A	T	NA	Gut microbiota abundance (genus Ruminococcaceae UCG014 id.11371)	TRUE
11	131659000	0.0664624	0.0150069	9.7618e-06	14306	ebi-a-GCST90017061	rs10791168	G	A	NA	Gut microbiota abundance (genus Ruminococcaceae UCG014 id.11371)	TRUE
16	87759750	0.067562	0.0150103	7.4266e-06	14306	ebi-a-GCST90017061	rs77627087	C	G	NA	Gut microbiota abundance (genus Ruminococcaceae UCG014 id.11371)	TRUE
18	4084336	-0.110863	0.0248098	8.73756e-06	14306	ebi-a-GCST90017061	rs79640386	T	A	NA	Gut microbiota abundance (genus Ruminococcaceae UCG014 id.11371)	TRUE
19	49175964	-0.0829544	0.0185058	7.33719e-06	14306	ebi-a-GCST90017061	rs17296933	C	G	NA	Gut microbiota abundance (genus Ruminococcaceae UCG014 id.11371)	TRUE
1	61827534	0.14455	0.0316912	5.73456e-06	14306	ebi-a-GCST90017091	rs11207728	A	G	NA	Gut microbiota abundance (order Bacillales id.1674)	TRUE
4	127766709	-0.164413	0.0353763	3.07319e-06	14306	ebi-a-GCST90017091	rs74420793	A	G	NA	Gut microbiota abundance (order Bacillales id.1674)	TRUE
5	78856074	0.174339	0.0400515	7.60221e-06	14306	ebi-a-GCST90017091	rs12522021	T	A	NA	Gut microbiota abundance (order Bacillales id.1674)	TRUE
7	117496144	-0.116319	0.0248527	3.508e-06	14306	ebi-a-GCST90017091	rs10233278	T	C	NA	Gut microbiota abundance (order Bacillales id.1674)	TRUE
7	49423832	-0.248861	0.0525929	1.97506e-06	14306	ebi-a-GCST90017091	rs4617108	G	A	NA	Gut microbiota abundance (order Bacillales id.1674)	TRUE
11	38085711	0.205765	0.0453311	8.85972e-06	14306	ebi-a-GCST90017091	rs11034576	A	G	NA	Gut microbiota abundance (order Bacillales id.1674)	TRUE
12	69332975	0.148238	0.0326455	4.49262e-06	14306	ebi-a-GCST90017091	rs62640857	A	G	NA	Gut microbiota abundance (order Bacillales id.1674)	TRUE
14	49001226	-0.143245	0.0320272	5.06209e-06	14306	ebi-a-GCST90017091	rs11844714	A	G	NA	Gut microbiota abundance (order Bacillales id.1674)	TRUE
19	14970441	-0.11471	0.0250025	5.57353e-06	14306	ebi-a-GCST90017091	rs10410917	C	T	NA	Gut microbiota abundance (order Bacillales id.1674)	TRUE
20	5826474	0.141125	0.0319309	9.87097e-06	14306	ebi-a-GCST90017091	rs1287018	G	A	NA	Gut microbiota abundance (order Bacillales id.1674)	TRUE
21	28684912	-0.192166	0.0358817	1.16118e-07	14306	ebi-a-GCST90017091	rs74887130	C	G	NA	Gut microbiota abundance (order Bacillales id.1674)	TRUE
2	239900775	0.0684302	0.0133636	2.75943e-07	14306	ebi-a-GCST90016926	rs62191117	A	G	NA	Gut microbiota abundance (family Alcaligenaceae id.2875)	TRUE
3	70588939	0.0603335	0.0127779	2.70477e-06	14306	ebi-a-GCST90016926	rs7638039	T	C	NA	Gut microbiota abundance (family Alcaligenaceae id.2875)	TRUE
3	193456274	0.0629104	0.0131712	1.84629e-06	14306	ebi-a-GCST90016926	rs2367850	G	C	NA	Gut microbiota abundance (family Alcaligenaceae id.2875)	TRUE
4	75867283	-0.0609257	0.0125363	1.1272e-06	14306	ebi-a-GCST90016926	rs17000015	A	T	NA	Gut microbiota abundance (family Alcaligenaceae id.2875)	TRUE
4	45642485	-0.081834	0.0168931	1.02903e-06	14306	ebi-a-GCST90016926	rs4033856	T	C	NA	Gut microbiota abundance (family Alcaligenaceae id.2875)	TRUE
5	173497796	0.110583	0.0238514	3.34696e-06	14306	ebi-a-GCST90016926	rs62395635	T	C	NA	Gut microbiota abundance (family Alcaligenaceae id.2875)	TRUE
5	104233461	-0.058727	0.0128306	5.96788e-06	14306	ebi-a-GCST90016926	rs1153990	A	G	NA	Gut microbiota abundance (family Alcaligenaceae id.2875)	TRUE
6	138305038	0.131484	0.0281089	3.56484e-06	14306	ebi-a-GCST90016926	rs112159068	A	T	NA	Gut microbiota abundance (family Alcaligenaceae id.2875)	TRUE
7	104214487	-0.0593564	0.0129137	3.8858e-06	14306	ebi-a-GCST90016926	rs6969323	A	C	NA	Gut microbiota abundance (family Alcaligenaceae id.2875)	TRUE
9	82485327	-0.0775052	0.0171554	5.27667e-06	14306	ebi-a-GCST90016926	rs112135816	T	G	NA	Gut microbiota abundance (family Alcaligenaceae id.2875)	TRUE
11	20763367	-0.0944052	0.0213287	6.85046e-06	14306	ebi-a-GCST90016926	rs74776516	T	G	NA	Gut microbiota abundance (family Alcaligenaceae id.2875)	TRUE
12	1396151	-0.106817	0.023298	3.33557e-06	14306	ebi-a-GCST90016926	rs7302582	G	C	NA	Gut microbiota abundance (family Alcaligenaceae id.2875)	TRUE
13	58545246	-0.0570888	0.0110683	2.35109e-07	14306	ebi-a-GCST90016926	rs9537886	A	C	NA	Gut microbiota abundance (family Alcaligenaceae id.2875)	TRUE
14	66593668	-0.0563972	0.0124753	6.08373e-06	14306	ebi-a-GCST90016926	rs2184675	A	T	NA	Gut microbiota abundance (family Alcaligenaceae id.2875)	TRUE
15	71522509	0.0516967	0.0115503	6.60602e-06	14306	ebi-a-GCST90016926	rs28480294	C	T	NA	Gut microbiota abundance (family Alcaligenaceae id.2875)	TRUE
16	85945839	0.0489475	0.0110321	9.12704e-06	14306	ebi-a-GCST90016926	rs147968	C	T	NA	Gut microbiota abundance (family Alcaligenaceae id.2875)	TRUE
18	26569901	0.0537051	0.0116008	4.47384e-06	14306	ebi-a-GCST90016926	rs9964679	A	G	NA	Gut microbiota abundance (family Alcaligenaceae id.2875)	TRUE
20	29836081	0.0738409	0.0151678	1.03743e-06	14306	ebi-a-GCST90016926	rs67737557	C	G	NA	Gut microbiota abundance (family Alcaligenaceae id.2875)	TRUE
1	67379595	-0.0701199	0.0158213	9.57679e-06	14306	ebi-a-GCST90016973	rs12034718	G	A	NA	Gut microbiota abundance (genus Butyricicoccus id.2055)	TRUE
2	191304149	-0.0549699	0.0123563	8.58638e-06	14306	ebi-a-GCST90016973	rs10084203	G	A	NA	Gut microbiota abundance (genus Butyricicoccus id.2055)	TRUE
2	153453410	0.0828027	0.0167401	7.61939e-07	14306	ebi-a-GCST90016973	rs56221232	T	C	NA	Gut microbiota abundance (genus Butyricicoccus id.2055)	TRUE
4	7460153	0.0506956	0.011024	3.87258e-06	14306	ebi-a-GCST90016973	rs2017189	T	G	NA	Gut microbiota abundance (genus Butyricicoccus id.2055)	TRUE
7	157688150	0.224039	0.0494959	5.93772e-06	14306	ebi-a-GCST90016973	rs62478070	T	G	NA	Gut microbiota abundance (genus Butyricicoccus id.2055)	TRUE
10	126908208	-0.0614216	0.0135979	7.38482e-06	14306	ebi-a-GCST90016973	rs4962426	T	G	NA	Gut microbiota abundance (genus Butyricicoccus id.2055)	TRUE
13	100213990	-0.0815733	0.0183167	5.51785e-06	14306	ebi-a-GCST90016973	rs7322368	C	T	NA	Gut microbiota abundance (genus Butyricicoccus id.2055)	TRUE
13	27018240	-0.262206	0.0564729	5.79189e-06	14306	ebi-a-GCST90016973	rs12585793	T	C	NA	Gut microbiota abundance (genus Butyricicoccus id.2055)	TRUE
18	22899113	0.0619423	0.0139942	6.79704e-06	14306	ebi-a-GCST90016973	rs75238760	T	A	NA	Gut microbiota abundance (genus Butyricicoccus id.2055)	TRUE
1	18501459	-0.193287	0.0379293	2.70128e-07	14306	ebi-a-GCST90016941	rs16861661	G	A	NA	Gut microbiota abundance (family Lactobacillaceae id.1836)	TRUE
1	179720669	0.191613	0.0425039	7.6952e-06	14306	ebi-a-GCST90016941	rs74599091	A	G	NA	Gut microbiota abundance (family Lactobacillaceae id.1836)	TRUE
2	135755629	0.0772453	0.0176921	9.6525e-06	14306	ebi-a-GCST90016941	rs1530559	G	A	NA	Gut microbiota abundance (family Lactobacillaceae id.1836)	TRUE
2	28903275	-0.0830224	0.0175267	2.59543e-06	14306	ebi-a-GCST90016941	rs11674854	C	T	NA	Gut microbiota abundance (family Lactobacillaceae id.1836)	TRUE
3	173151665	-0.219178	0.0473566	5.9595e-06	14306	ebi-a-GCST90016941	rs77478751	A	G	NA	Gut microbiota abundance (family Lactobacillaceae id.1836)	TRUE
4	109896462	0.177082	0.0392269	6.59189e-06	14306	ebi-a-GCST90016941	rs62314653	C	A	NA	Gut microbiota abundance (family Lactobacillaceae id.1836)	TRUE
6	67559323	-0.124042	0.0278946	9.44583e-06	14306	ebi-a-GCST90016941	rs9345899	A	G	NA	Gut microbiota abundance (family Lactobacillaceae id.1836)	TRUE
8	69010103	-0.0792344	0.0170604	3.60761e-06	14306	ebi-a-GCST90016941	rs768253	T	G	NA	Gut microbiota abundance (family Lactobacillaceae id.1836)	TRUE
13	23836941	-0.10381	0.0220135	3.89933e-06	14306	ebi-a-GCST90016941	rs1590596	C	G	NA	Gut microbiota abundance (family Lactobacillaceae id.1836)	TRUE
16	73890910	0.082529	0.0168225	8.69121e-07	14306	ebi-a-GCST90016941	rs328312	T	A	NA	Gut microbiota abundance (family Lactobacillaceae id.1836)	TRUE
19	6928017	0.0999419	0.0201687	5.77192e-07	14306	ebi-a-GCST90016941	rs921925	A	C	NA	Gut microbiota abundance (family Lactobacillaceae id.1836)	TRUE
20	54192992	-0.0825646	0.0170282	1.38159e-06	14306	ebi-a-GCST90016941	rs6092149	A	T	NA	Gut microbiota abundance (family Lactobacillaceae id.1836)	TRUE
1	234126516	0.126418	0.0282207	8.58361e-06	14306	ebi-a-GCST90016964	rs4364940	A	G	NA	Gut microbiota abundance (genus Alloprevotella id.961)	TRUE
3	152805600	0.119599	0.0259446	4.99057e-06	14306	ebi-a-GCST90016964	rs4680035	G	A	NA	Gut microbiota abundance (genus Alloprevotella id.961)	TRUE
3	79794395	0.125564	0.0280409	9.27129e-06	14306	ebi-a-GCST90016964	rs17380632	A	T	NA	Gut microbiota abundance (genus Alloprevotella id.961)	TRUE
4	189076705	-0.161506	0.0359102	7.93615e-06	14306	ebi-a-GCST90016964	rs58212166	A	G	NA	Gut microbiota abundance (genus Alloprevotella id.961)	TRUE
8	69994816	0.145669	0.0290678	9.63718e-07	14306	ebi-a-GCST90016964	rs12675596	G	T	NA	Gut microbiota abundance (genus Alloprevotella id.961)	TRUE
21	36053643	-0.138234	0.0308961	8.36758e-06	14306	ebi-a-GCST90016964	rs2154444	G	T	NA	Gut microbiota abundance (genus Alloprevotella id.961)	TRUE
21	40993008	-0.156037	0.0344392	8.84199e-06	14306	ebi-a-GCST90016964	rs34619204	G	A	NA	Gut microbiota abundance (genus Alloprevotella id.961)	TRUE
1	179370499	-0.120881	0.0249229	1.51985e-06	14306	ebi-a-GCST90017059	rs12724320	C	T	NA	Gut microbiota abundance (genus Ruminococcaceae UCG011 id.11368)	TRUE
1	219901055	-0.184934	0.0394616	2.36772e-06	14306	ebi-a-GCST90017059	rs9729514	G	A	NA	Gut microbiota abundance (genus Ruminococcaceae UCG011 id.11368)	TRUE
3	76205107	-0.111816	0.0248963	7.74622e-06	14306	ebi-a-GCST90017059	rs4490371	T	C	NA	Gut microbiota abundance (genus Ruminococcaceae UCG011 id.11368)	TRUE
3	185469491	0.132725	0.0282037	2.81235e-06	14306	ebi-a-GCST90017059	rs12636310	G	A	NA	Gut microbiota abundance (genus Ruminococcaceae UCG011 id.11368)	TRUE
6	105073676	-0.182339	0.0339898	7.04417e-08	14306	ebi-a-GCST90017059	rs1416041	A	C	NA	Gut microbiota abundance (genus Ruminococcaceae UCG011 id.11368)	TRUE
7	111763988	0.109097	0.0233699	3.18676e-06	14306	ebi-a-GCST90017059	rs2729556	T	C	NA	Gut microbiota abundance (genus Ruminococcaceae UCG011 id.11368)	TRUE
7	11222521	0.110917	0.0244556	6.49606e-06	14306	ebi-a-GCST90017059	rs10274562	C	T	NA	Gut microbiota abundance (genus Ruminococcaceae UCG011 id.11368)	TRUE
12	29634919	-0.152166	0.0317519	2.06125e-06	14306	ebi-a-GCST90017059	rs79113084	C	T	NA	Gut microbiota abundance (genus Ruminococcaceae UCG011 id.11368)	TRUE
1	183503664	-0.112639	0.0242751	5.19709e-06	14306	ebi-a-GCST90017009	rs3842897	G	A	NA	Gut microbiota abundance (genus Family XIII UCG001 id.11294)	TRUE
1	85228325	-0.0647298	0.0134065	1.17379e-06	14306	ebi-a-GCST90017009	rs12049454	T	C	NA	Gut microbiota abundance (genus Family XIII UCG001 id.11294)	TRUE
3	45479090	0.19313	0.0419866	3.77477e-06	14306	ebi-a-GCST90017009	rs76463770	A	G	NA	Gut microbiota abundance (genus Family XIII UCG001 id.11294)	TRUE
3	188224096	0.0665521	0.0137151	1.24934e-06	14306	ebi-a-GCST90017009	rs1426266	C	T	NA	Gut microbiota abundance (genus Family XIII UCG001 id.11294)	TRUE
6	76598635	-0.0611904	0.013457	4.29181e-06	14306	ebi-a-GCST90017009	rs62414802	C	T	NA	Gut microbiota abundance (genus Family XIII UCG001 id.11294)	TRUE
11	94681786	-0.0809085	0.0174782	3.52493e-06	14306	ebi-a-GCST90017009	rs7119679	G	A	NA	Gut microbiota abundance (genus Family XIII UCG001 id.11294)	TRUE
15	25151194	-0.121679	0.0260821	3.04635e-06	14306	ebi-a-GCST90017009	rs116979587	T	A	NA	Gut microbiota abundance (genus Family XIII UCG001 id.11294)	TRUE
17	78223817	-0.088655	0.0198094	8.01826e-06	14306	ebi-a-GCST90017009	rs8076666	G	A	NA	Gut microbiota abundance (genus Family XIII UCG001 id.11294)	TRUE
17	33761027	-0.149047	0.0333271	7.87771e-06	14306	ebi-a-GCST90017009	rs112362903	A	G	NA	Gut microbiota abundance (genus Family XIII UCG001 id.11294)	TRUE
21	45153079	-0.0759406	0.0165099	5.35673e-06	14306	ebi-a-GCST90017009	rs2276529	C	G	NA	Gut microbiota abundance (genus Family XIII UCG001 id.11294)	TRUE
1	203991605	-0.112244	0.0253553	2.27023e-06	14306	ebi-a-GCST90017097	rs2692012	G	A	NA	Gut microbiota abundance (order Desulfovibrionales id.3156)	TRUE
1	203308383	-0.0729137	0.0150954	2.7029e-06	14306	ebi-a-GCST90017097	rs16851319	G	C	NA	Gut microbiota abundance (order Desulfovibrionales id.3156)	TRUE
2	233929283	-0.0524466	0.0115749	7.19747e-06	14306	ebi-a-GCST90017097	rs3935584	C	T	NA	Gut microbiota abundance (order Desulfovibrionales id.3156)	TRUE
3	31133401	0.0529219	0.0118542	8.7444e-06	14306	ebi-a-GCST90017097	rs186073	T	C	NA	Gut microbiota abundance (order Desulfovibrionales id.3156)	TRUE
8	57865378	-0.0772459	0.0170876	9.00285e-06	14306	ebi-a-GCST90017097	rs72647048	T	C	NA	Gut microbiota abundance (order Desulfovibrionales id.3156)	TRUE
9	15269705	0.21009	0.0456974	3.21655e-06	14306	ebi-a-GCST90017097	rs112381107	C	T	NA	Gut microbiota abundance (order Desulfovibrionales id.3156)	TRUE
9	81834426	-0.0727501	0.0154369	2.25294e-06	14306	ebi-a-GCST90017097	rs17791387	A	G	NA	Gut microbiota abundance (order Desulfovibrionales id.3156)	TRUE
10	11855599	0.0554862	0.0117486	2.60699e-06	14306	ebi-a-GCST90017097	rs11599763	C	T	NA	Gut microbiota abundance (order Desulfovibrionales id.3156)	TRUE
15	96161065	-0.0573633	0.0129462	7.50983e-06	14306	ebi-a-GCST90017097	rs62020470	A	G	NA	Gut microbiota abundance (order Desulfovibrionales id.3156)	TRUE
16	71541641	-0.0544713	0.0117811	3.96634e-06	14306	ebi-a-GCST90017097	rs9928243	C	A	NA	Gut microbiota abundance (order Desulfovibrionales id.3156)	TRUE
17	2856662	-0.0953383	0.0201367	2.42996e-06	14306	ebi-a-GCST90017097	rs4506934	C	T	NA	Gut microbiota abundance (order Desulfovibrionales id.3156)	TRUE
20	33694801	0.0836765	0.0166098	2.52773e-07	14306	ebi-a-GCST90017097	rs6058181	C	T	NA	Gut microbiota abundance (order Desulfovibrionales id.3156)	TRUE
21	45064961	0.0569024	0.0124223	4.16793e-06	14306	ebi-a-GCST90017097	rs2838334	G	A	NA	Gut microbiota abundance (order Desulfovibrionales id.3156)	TRUE
2	33607071	-0.149152	0.0316484	3.34511e-06	14306	ebi-a-GCST90016963	rs6742198	A	G	NA	Gut microbiota abundance (genus Allisonella id.2174)	TRUE
5	114286707	-0.115769	0.0248626	3.58798e-06	14306	ebi-a-GCST90016963	rs1901739	G	T	NA	Gut microbiota abundance (genus Allisonella id.2174)	TRUE
7	137968010	0.148523	0.0334857	6.08751e-06	14306	ebi-a-GCST90016963	rs76904847	G	A	NA	Gut microbiota abundance (genus Allisonella id.2174)	TRUE
9	100150556	0.146679	0.0297186	1.20629e-06	14306	ebi-a-GCST90016963	rs35778461	C	T	NA	Gut microbiota abundance (genus Allisonella id.2174)	TRUE
9	79110160	-0.168974	0.0296976	3.56574e-08	14306	ebi-a-GCST90016963	rs602075	G	A	NA	Gut microbiota abundance (genus Allisonella id.2174)	TRUE
10	122413451	0.167966	0.0373586	8.87279e-06	14306	ebi-a-GCST90016963	rs7898615	T	G	NA	Gut microbiota abundance (genus Allisonella id.2174)	TRUE
11	88632972	-0.112231	0.0251681	9.41109e-06	14306	ebi-a-GCST90016963	rs594561	T	C	NA	Gut microbiota abundance (genus Allisonella id.2174)	TRUE
12	28018998	-0.146322	0.0320852	5.72321e-06	14306	ebi-a-GCST90016963	rs35110698	T	C	NA	Gut microbiota abundance (genus Allisonella id.2174)	TRUE
18	75370866	-0.175203	0.0404474	4.88394e-06	14306	ebi-a-GCST90016963	rs685403	G	C	NA	Gut microbiota abundance (genus Allisonella id.2174)	TRUE
1	14201546	0.0641305	0.0149933	8.80278e-06	14306	ebi-a-GCST90017007	rs12753492	A	C	NA	Gut microbiota abundance (genus Faecalibacterium id.2057)	TRUE
1	245267339	-0.232262	0.0512364	7.01892e-06	14306	ebi-a-GCST90017007	rs10927394	G	T	NA	Gut microbiota abundance (genus Faecalibacterium id.2057)	TRUE
1	111036827	0.145631	0.0323019	8.13561e-06	14306	ebi-a-GCST90017007	rs79656633	T	C	NA	Gut microbiota abundance (genus Faecalibacterium id.2057)	TRUE
2	37125235	-0.0861565	0.01896	5.69574e-06	14306	ebi-a-GCST90017007	rs114946999	C	T	NA	Gut microbiota abundance (genus Faecalibacterium id.2057)	TRUE
6	131587157	-0.134864	0.0277032	1.37848e-06	14306	ebi-a-GCST90017007	rs6910935	G	A	NA	Gut microbiota abundance (genus Faecalibacterium id.2057)	TRUE
8	38593645	-0.078354	0.017183	6.39676e-06	14306	ebi-a-GCST90017007	rs11776390	T	C	NA	Gut microbiota abundance (genus Faecalibacterium id.2057)	TRUE
10	128614990	0.0817953	0.018369	9.18015e-06	14306	ebi-a-GCST90017007	rs61875484	C	G	NA	Gut microbiota abundance (genus Faecalibacterium id.2057)	TRUE
12	83502773	0.094833	0.0163962	7.56955e-09	14306	ebi-a-GCST90017007	rs12320842	C	G	NA	Gut microbiota abundance (genus Faecalibacterium id.2057)	TRUE
13	53567017	-0.048317	0.010797	5.33261e-06	14306	ebi-a-GCST90017007	rs9536330	T	C	NA	Gut microbiota abundance (genus Faecalibacterium id.2057)	TRUE
14	64044097	-0.0576251	0.0119649	1.3017e-06	14306	ebi-a-GCST90017007	rs1271565	C	T	NA	Gut microbiota abundance (genus Faecalibacterium id.2057)	TRUE
15	47404021	0.0504817	0.0109368	3.66454e-06	14306	ebi-a-GCST90017007	rs28376661	C	G	NA	Gut microbiota abundance (genus Faecalibacterium id.2057)	TRUE
16	6099863	0.227585	0.0465522	1.76449e-06	14306	ebi-a-GCST90017007	rs75499067	C	T	NA	Gut microbiota abundance (genus Faecalibacterium id.2057)	TRUE
21	39027901	-0.0866356	0.0196496	7.54397e-06	14306	ebi-a-GCST90017007	rs2835874	T	C	NA	Gut microbiota abundance (genus Faecalibacterium id.2057)	TRUE
3	144148905	0.0775591	0.0174641	8.95014e-06	14306	ebi-a-GCST90017073	rs2569953	C	A	NA	Gut microbiota abundance (genus Terrisporobacter id.11348)	TRUE
9	117245252	-0.0799209	0.0173794	4.53774e-06	14306	ebi-a-GCST90017073	rs7034891	G	C	NA	Gut microbiota abundance (genus Terrisporobacter id.11348)	TRUE
11	8938819	0.226399	0.0454642	4.15786e-07	14306	ebi-a-GCST90017073	rs1883097	C	T	NA	Gut microbiota abundance (genus Terrisporobacter id.11348)	TRUE
11	20621043	0.134617	0.0301177	7.93707e-06	14306	ebi-a-GCST90017073	rs58405430	G	T	NA	Gut microbiota abundance (genus Terrisporobacter id.11348)	TRUE
16	15920394	0.091256	0.0205493	8.48106e-06	14306	ebi-a-GCST90017073	rs7184125	T	C	NA	Gut microbiota abundance (genus Terrisporobacter id.11348)	TRUE
19	17026940	0.0814505	0.0175943	3.97137e-06	14306	ebi-a-GCST90017073	rs2872237	A	C	NA	Gut microbiota abundance (genus Terrisporobacter id.11348)	TRUE
2	169033340	0.136039	0.0284399	1.31383e-06	14306	ebi-a-GCST90017106	rs76784716	A	G	NA	Gut microbiota abundance (order Rhodospirillales id.2667)	TRUE
2	225633812	0.094128	0.0198389	2.68368e-06	14306	ebi-a-GCST90017106	rs3754624	C	T	NA	Gut microbiota abundance (order Rhodospirillales id.2667)	TRUE
3	84471266	-0.0865002	0.0195197	7.87318e-06	14306	ebi-a-GCST90017106	rs55876211	C	T	NA	Gut microbiota abundance (order Rhodospirillales id.2667)	TRUE
3	13726736	-0.0830794	0.0162642	3.07213e-07	14306	ebi-a-GCST90017106	rs9813022	A	G	NA	Gut microbiota abundance (order Rhodospirillales id.2667)	TRUE
4	134248015	-0.0997433	0.0222165	6.02033e-06	14306	ebi-a-GCST90017106	rs77304857	C	A	NA	Gut microbiota abundance (order Rhodospirillales id.2667)	TRUE
5	27945645	0.0996735	0.0216667	3.88025e-06	14306	ebi-a-GCST90017106	rs1549633	A	C	NA	Gut microbiota abundance (order Rhodospirillales id.2667)	TRUE
5	67577051	0.0800354	0.0178737	7.98252e-06	14306	ebi-a-GCST90017106	rs3730086	A	G	NA	Gut microbiota abundance (order Rhodospirillales id.2667)	TRUE
5	119372737	-0.114725	0.0247994	4.07165e-06	14306	ebi-a-GCST90017106	rs1035406	G	A	NA	Gut microbiota abundance (order Rhodospirillales id.2667)	TRUE
8	131958403	0.120726	0.0260989	2.83067e-06	14306	ebi-a-GCST90017106	rs7001029	C	T	NA	Gut microbiota abundance (order Rhodospirillales id.2667)	TRUE
10	2670553	0.105215	0.0233778	3.98043e-06	14306	ebi-a-GCST90017106	rs4278423	T	C	NA	Gut microbiota abundance (order Rhodospirillales id.2667)	TRUE
10	113419797	0.0722755	0.0158186	4.68533e-06	14306	ebi-a-GCST90017106	rs11591293	G	T	NA	Gut microbiota abundance (order Rhodospirillales id.2667)	TRUE
12	73139398	0.164663	0.0360285	6.99874e-06	14306	ebi-a-GCST90017106	rs61933850	G	A	NA	Gut microbiota abundance (order Rhodospirillales id.2667)	TRUE
15	61775734	0.0945198	0.0202139	3.70382e-06	14306	ebi-a-GCST90017106	rs11630875	T	C	NA	Gut microbiota abundance (order Rhodospirillales id.2667)	TRUE
16	88554243	-0.0695313	0.0157065	9.74675e-06	14306	ebi-a-GCST90017106	rs13336560	C	T	NA	Gut microbiota abundance (order Rhodospirillales id.2667)	TRUE
22	27173098	0.0727755	0.0159522	7.32723e-06	14306	ebi-a-GCST90017106	rs4822789	G	C	NA	Gut microbiota abundance (order Rhodospirillales id.2667)	TRUE
1	179629191	0.108044	0.023638	5.32023e-06	14306	ebi-a-GCST90017035	rs7540303	C	T	NA	Gut microbiota abundance (genus Olsenella id.822)	TRUE
[truncated: 811 more rows]

## Sheet: Table S5
Table S5: Instrumental variables used in MR analyisis between cytokines and inflammatory skin diseases
[truncated: 1,820 more rows]

## Sheet: Table S6
Table S6: Full result of MR estimates for the association between gut microbiota and inflammatory dermatoses
[truncated: 5,779 more rows]

[truncated: 9 more sheets: Table S7, Table S8, Table S9, Table S10, Table S11, Table S12, Table S13, Table S14, Table S15]
